# Supplementary material
Source: PubMed Central journal article supplement (PMC6233079)
Supplement: pnas.1813593115.sapp.pdf [file pnas.1813593115.sapp.pdf]

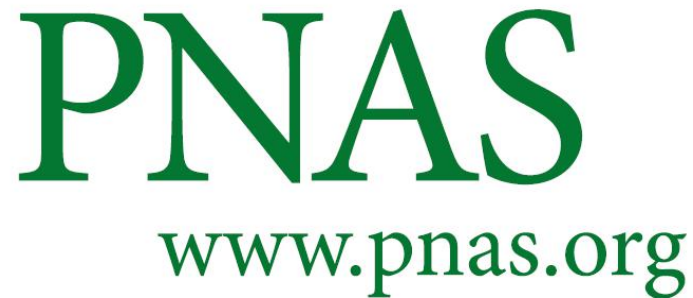

Supplementary Information for

**Species Groups Distributed Across Elevational Gradients Reveal Convergent and Continuous Genetic Adaptation to High Elevations**

Yan-Bo Sun<sup>a,b,1</sup>, Ting-Ting Fu<sup>a,b,d,1</sup>, Jie-Qiong Jin<sup>a,b</sup>, Robert W. Murphy<sup>a,f</sup>, David M. Hillis<sup>g,2</sup>, Ya-Ping Zhang<sup>a,b,c,e,2</sup>, and Jing Che<sup>a,b,c,e,2</sup>

<sup>a</sup>State Key Laboratory of Genetic Resources and Evolution, Kunming Institute of Zoology, Chinese Academy of Sciences, Kunming 650223, China

<sup>b</sup>Kunming College of Life Science, University of Chinese Academy of Sciences, Kunming 650204, China

<sup>c</sup>Centre for Biodiversity and Conservation Biology, Royal Ontario Museum, 100 Queen's Park, Toronto, Ont., M5S 2C6, Canada

<sup>d</sup>Department of Integrative Biology and Biodiversity Center, University of Texas at Austin, Austin, TX 78712

<sup>e</sup>Center for Excellence in Animal Evolution and Genetics, Chinese Academy of Sciences, Kunming 650223, China

<sup>f</sup>Southeast Asia Biodiversity Research Institute, Chinese Academy of Sciences, Yezin, Nay Pyi Taw 05282, Myanmar

<sup>1</sup>These authors contribute equally to this work

<sup>2</sup>Corresponding author: [chej@mail.kiz.ac.cn](mailto:chej@mail.kiz.ac.cn), [zhangyp@mail.kiz.ac.cn](mailto:zhangyp@mail.kiz.ac.cn) or [dhillis@austin.utexas.edu](mailto:dhillis@austin.utexas.edu)

**This PDF file includes:**

Figure S1 to S2  
Tables S1 to S36

**Other supplementary materials for this manuscript include the following:**

Dataset S1

Figure S1. Species phylogenies and distributions of the two studied groups.

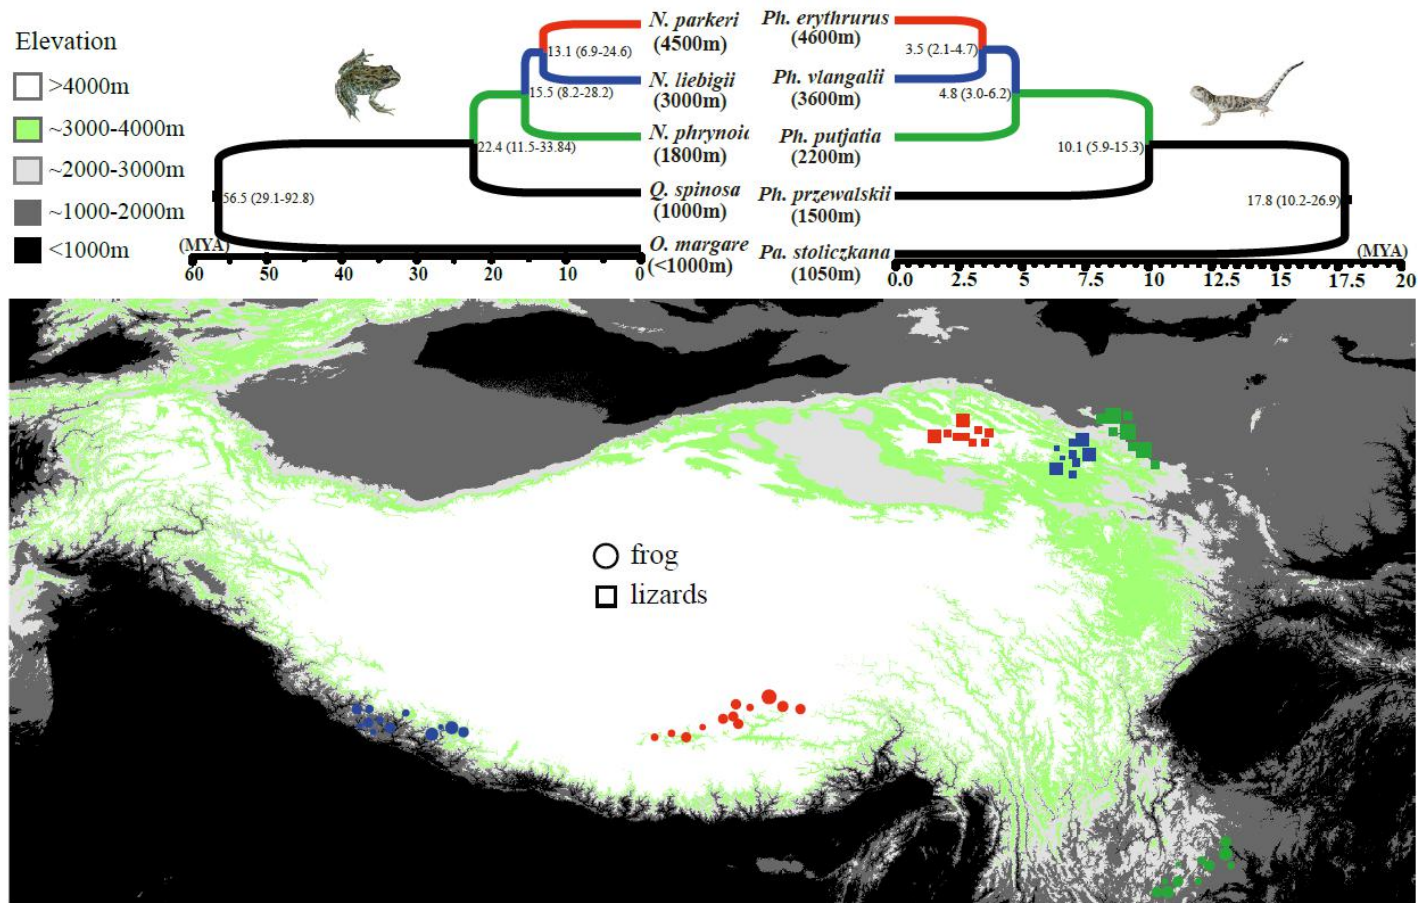

Figure S2. Comparison of the proportion of PSGs among different functions.

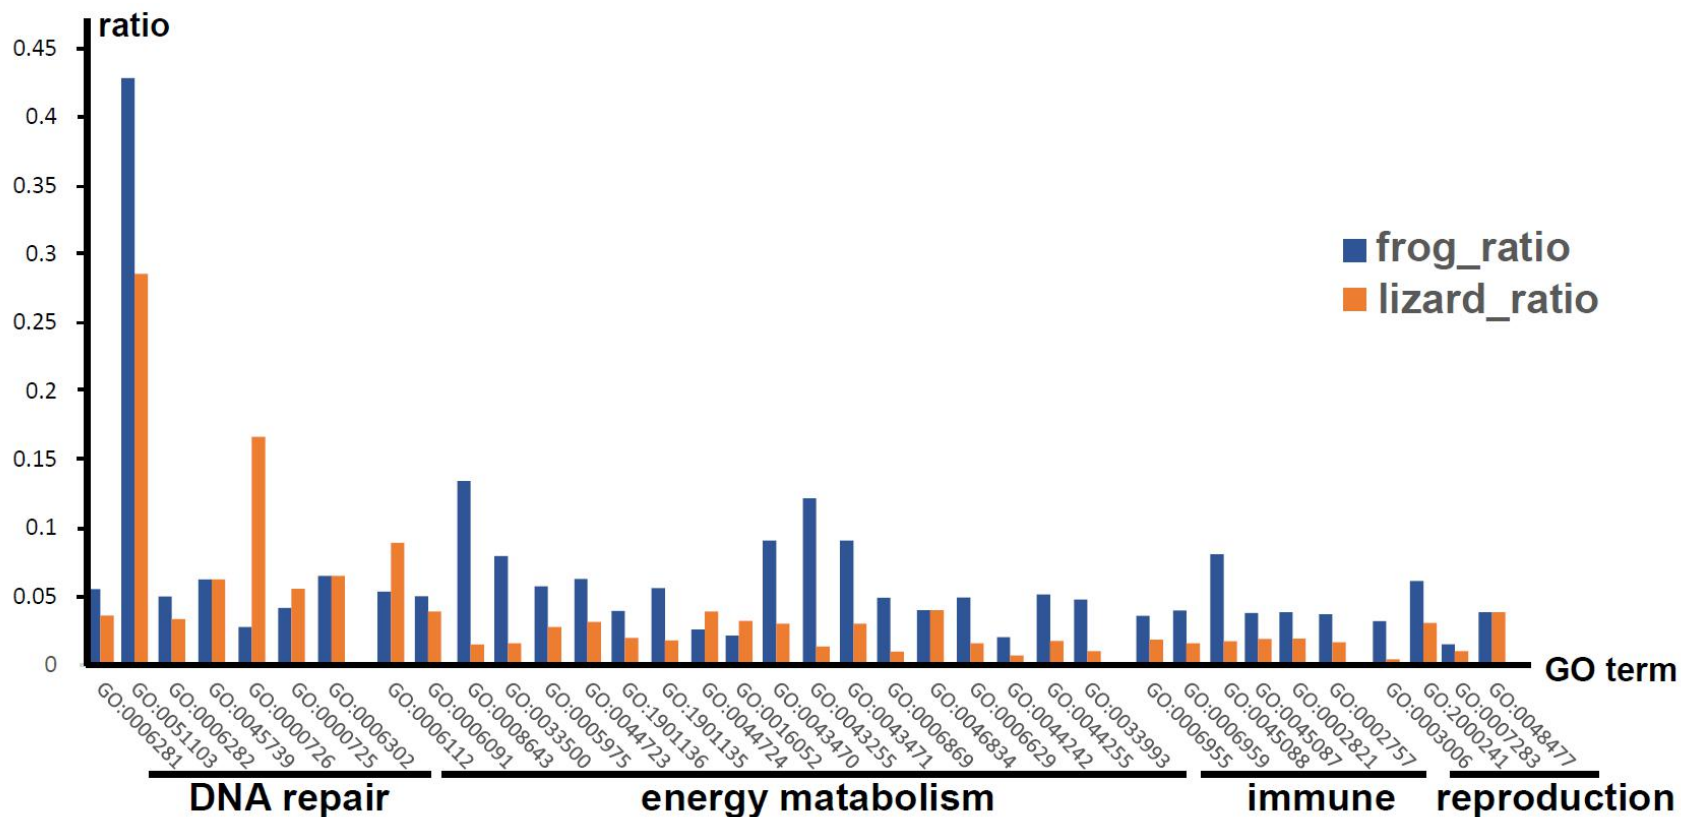

Table S1. Statistics of the sequencing, assembly, and mapping of the transcriptomes of the five studied frog species.

|                                     | <i>N. parkeri</i> | <i>N. pleskei</i> | <i>N. liebigii</i> | <i>N. phrynoides</i> | <i>Q. spinosa</i> |
|-------------------------------------|-------------------|-------------------|--------------------|----------------------|-------------------|
| <b>Statistics for cleaned reads</b> |                   |                   |                    |                      |                   |
| Brain                               | 31747793          | 28372324          | 30089889           | 36982011             | 44806278          |

|        |           |           |           |          |           |
|--------|-----------|-----------|-----------|----------|-----------|
| Heart  | 68919061  | NA        | 39001346  | 37108402 | 42516294  |
| Liver  | 37751646  | 29983581  | 27273475  | 21938277 | 31297635  |
| Ovary  | 40151610  | 38496558  | 24922554  | NA       | 61407966  |
| Skin   | 41843091  | 38825058  | 23503252  | NA       | 43138626  |
| Testis | 62470978  | 59282415  | 52438831  | NA       | 64628702  |
| Total  | 282884179 | 194959936 | 197229347 | 96028690 | 287795501 |

**Statistics for assemblies**

|          |           |           |           |           |           |
|----------|-----------|-----------|-----------|-----------|-----------|
| n_seqs   | 162309    | 123903    | 109250    | 145507    | 174007    |
| n_bases  | 185021286 | 142948117 | 121932574 | 149433562 | 168143443 |
| mean_len | 1139.93   | 1153.71   | 1116.09   | 1026.99   | 966.3     |
| N90      | 429       | 436       | 419       | 389       | 393       |
| N50      | 1984      | 1968      | 1914      | 1788      | 1483      |

**Statistics for mapping rates**

|        |      |      |      |      |      |
|--------|------|------|------|------|------|
| Brain  | 0.87 | 0.89 | 0.66 | 0.85 | 0.9  |
| Heart  | 0.9  | NA   | 0.92 | 0.91 | 0.9  |
| Liver  | 0.94 | 0.95 | 0.97 | 0.96 | 0.93 |
| Ovary  | 0.87 | 0.91 | 0.88 | NA   | 0.85 |
| Skin   | 0.9  | 0.92 | 0.92 | NA   | 0.92 |
| Testis | 0.84 | 0.8  | 0.71 | NA   | 0.84 |

(n\_seqs: number of seqs; n\_bases: number of bases; mean\_len: mean length; N90: the length of the smallest contig in the set that contains the fewest (largest) contigs whose combined length represents at least 90% of the assembly; N50: the length of the smallest contig in the set that contains the fewest (largest) contigs whose combined length represents at least 50% of the assembly)

**Table S2. PSGs identified on branch 7 of frog.**

| <b>Ensembl Prot ID</b> | <b>Ensembl Gene ID</b> | <b>Ensembl Trans ID</b> | <b>HNGC Name</b> |
|------------------------|------------------------|-------------------------|------------------|
| ENSACAP00000017607     | ENSACAG00000017862     | ENSACAT00000017953      | NID2             |
| ENSACAP00000001510     | ENSACAG00000001589     | ENSACAT00000001546      | CCDC6            |

|                    |                    |                    |           |
|--------------------|--------------------|--------------------|-----------|
| ENSACAP00000011157 | ENSACAG00000010939 | ENSACAT00000011389 | TLN1      |
| ENSACAP00000000577 | ENSACAG00000000375 | ENSACAT00000000596 | SUPT5H    |
| ENSACAP00000006240 | ENSACAG00000006382 | ENSACAT00000006379 | MRPL48    |
| ENSACAP00000013530 | ENSACAG00000013806 | ENSACAT00000013808 | C15orf40  |
| ENSACAP00000010281 | ENSACAG00000010443 | ENSACAT00000010493 | MYPN      |
| ENSACAP00000013942 | ENSACAG00000014212 | ENSACAT00000014228 |           |
| ENSACAP00000004204 | ENSACAG00000004343 | ENSACAT00000004303 |           |
| ENSACAP00000016408 | ENSACAG00000016668 | ENSACAT00000016733 | HTATIP2   |
| ENSACAP00000017016 | ENSACAG00000017279 | ENSACAT00000017351 | RPL13A    |
| ENSACAP00000009390 | ENSACAG00000009594 | ENSACAT00000009585 |           |
| ENSACAP00000006024 | ENSACAG00000006175 | ENSACAT00000006158 | ZNF518A   |
| ENSACAP00000020409 | ENSACAG00000025807 | ENSACAT00000024910 |           |
| ENSACAP00000014496 | ENSACAG00000014522 | ENSACAT00000014791 | KIAA0319L |
| ENSACAP00000012225 | ENSACAG00000012412 | ENSACAT00000012475 | TINAGL1   |
| ENSACAP00000012152 | ENSACAG00000012399 | ENSACAT00000012398 | PEF1      |
| ENSACAP00000015045 | ENSACAG00000015301 | ENSACAT00000015349 | MRPL28    |
| ENSACAP00000009086 | ENSACAG00000009224 | ENSACAT00000009279 | XPNPEP2   |
| ENSACAP00000001230 | ENSACAG00000001340 | ENSACAT00000001263 | MUL1      |
| ENSACAP00000019661 | ENSACAG00000028065 | ENSACAT00000026241 | IFNGR1    |
| ENSACAP00000001568 | ENSACAG00000001189 | ENSACAT00000001605 | GRIN1     |
| ENSACAP00000007253 | ENSACAG00000007287 | ENSACAT00000007408 | STX4      |
| ENSACAP00000000726 | ENSACAG00000000734 | ENSACAT00000000750 | CEP95     |
| ENSACAP00000004828 | ENSACAG00000004882 | ENSACAT00000004936 | PDIA3     |
| ENSACAP00000007602 | ENSACAG00000007494 | ENSACAT00000007763 | SPTBN2    |
| ENSACAP00000015368 | ENSACAG00000015612 | ENSACAT00000015681 | DPAGT1    |
| ENSACAP00000017456 | ENSACAG00000017715 | ENSACAT00000017798 | EXOC2     |
| ENSACAP00000000221 | ENSACAG00000000233 | ENSACAT00000000226 | RAB11FIP1 |
| ENSACAP00000007082 | ENSACAG00000007230 | ENSACAT00000007235 |           |
| ENSACAP00000007739 | ENSACAG00000007802 | ENSACAT00000007905 | APIG1     |
| ENSACAP00000007392 | ENSACAG00000007495 | ENSACAT00000007549 | PCIF1     |

|                     |                     |                     |          |
|---------------------|---------------------|---------------------|----------|
| ENSACAP0000001605   | ENSACAG0000001652   | ENSACAT0000001644   | RSRC2    |
| ENSACAP00000009907  | ENSACAG00000010107  | ENSACAT00000010110  | BBS10    |
| ENSACAP00000009618  | ENSACAG00000009734  | ENSACAT00000009815  | AFAP1L2  |
| ENSACAP00000006379  | ENSACAG00000006527  | ENSACAT00000006522  | PTGFR    |
| ENSACAP00000008308  | ENSACAG00000008449  | ENSACAT00000008487  | PLA2G6   |
| ENSACAP00000017541  | ENSACAG00000017813  | ENSACAT00000017887  | STMN1    |
| ENSACAP00000009217  | ENSACAG00000009420  | ENSACAT00000009410  | CTHRC1   |
| ENSACAP00000011007  | ENSACAG00000011206  | ENSACAT00000011235  | STARD5   |
| ENSACAP00000000190  | ENSACAG00000000197  | ENSACAT00000000193  | RPLP1    |
| ENSACAP00000012760  | ENSACAG00000012995  | ENSACAT00000013016  | PTGR1    |
| ENSACAP00000008480  | ENSACAG00000008679  | ENSACAT00000008662  | RERE     |
| ENSACAP00000008439  | ENSACAG00000008492  | ENSACAT00000008621  | NOC2L    |
| ENSACAP00000015231  | ENSACAG00000015062  | ENSACAT00000015539  | COL3A1   |
| ENSACAP00000002246  | ENSACAG00000002283  | ENSACAT00000002306  | MTX1     |
| ENSACAP00000000009  | ENSACAG00000000010  | ENSACAT00000000010  | C9orf114 |
| ENSACAP00000008955  | ENSACAG00000009158  | ENSACAT00000009147  | H6PD     |
| ENSACAP00000003816  | ENSACAG00000003931  | ENSACAT00000003908  | MOCS3    |
| ENSACAP00000006332  | ENSACAG00000006410  | ENSACAT00000006474  | PPL      |
| ENSACAP00000013508  | ENSACAG00000013732  | ENSACAT00000013786  | IMPA1    |
| ENSACAP00000005323  | ENSACAG00000005405  | ENSACAT00000005440  | SDCBP    |
| ENSACAP00000001612  | ENSACAG00000001561  | ENSACAT00000001651  | EDC4     |
| ENSACAP00000016387  | ENSACAG00000016630  | ENSACAT00000016711  | ADHFE1   |
| ENSACAP000000022567 | ENSACAG000000029031 | ENSACAT000000029984 | THY1     |
| ENSACAP00000000097  | ENSACAG00000000097  | ENSACAT00000000099  | ST3GAL4  |
| ENSACAP00000017417  | ENSACAG00000017674  | ENSACAT00000017759  | STX12    |
| ENSACAP00000015283  | ENSACAG00000015561  | ENSACAT00000015593  | C12orf65 |
| ENSACAP00000005642  | ENSACAG00000005783  | ENSACAT00000005765  | NOP56    |
| ENSACAP00000005757  | ENSACAG00000005785  | ENSACAT00000005884  | IDH3B    |
| ENSACAP00000001710  | ENSACAG00000001452  | ENSACAT00000001750  | TPR      |
| ENSACAP00000018531  | ENSACAG00000000642  | ENSACAT00000026269  | MRPS18A  |

|                    |                     |                     |          |
|--------------------|---------------------|---------------------|----------|
| ENSACAP00000013104 | ENSACAG00000013226  | ENSACAT00000013364  |          |
| ENSACAP00000003323 | ENSACAG00000003408  | ENSACAT00000003406  | SPINT1   |
| ENSACAP00000008645 | ENSACAG00000008766  | ENSACAT00000008829  | NDC80    |
| ENSACAP00000004975 | ENSACAG00000005023  | ENSACAT00000005088  | DHX9     |
| ENSACAP00000021856 | ENSACAG00000009246  | ENSACAT00000029274  | MYOM1    |
| ENSACAP00000006621 | ENSACAG00000006760  | ENSACAT00000006767  | HHATL    |
| ENSACAP00000003089 | ENSACAG00000003151  | ENSACAT00000003168  | CIRH1A   |
| ENSACAP00000003435 | ENSACAG00000003527  | ENSACAT00000003520  |          |
| ENSACAP00000014368 | ENSACAG00000014635  | ENSACAT00000014661  | CCKAR    |
| ENSACAP00000003280 | ENSACAG00000003259  | ENSACAT00000003363  | CEP120   |
| ENSACAP00000007588 | ENSACAG00000007655  | ENSACAT00000007749  | CHFR     |
| ENSACAP00000004177 | ENSACAG00000004251  | ENSACAT00000004276  | PAK1IP1  |
| ENSACAP00000017711 | ENSACAG00000017988  | ENSACAT00000018059  | TGS1     |
| ENSACAP00000016402 | ENSACAG00000016680  | ENSACAT00000016727  | C1QL3    |
| ENSACAP00000016956 | ENSACAG00000017208  | ENSACAT00000017291  | FLOT1    |
| ENSACAP00000002766 | ENSACAG00000002701  | ENSACAT00000002836  | ATL3     |
| ENSACAP00000019744 | ENSACAG000000026199 | ENSACAT000000025542 | TMEM158  |
| ENSACAP00000016067 | ENSACAG00000016360  | ENSACAT00000016387  | MYADM    |
| ENSACAP00000015077 | ENSACAG00000015336  | ENSACAT00000015381  | MMP19    |
| ENSACAP00000013343 | ENSACAG00000013301  | ENSACAT00000013614  | COL1A2   |
| ENSACAP00000015291 | ENSACAG00000015534  | ENSACAT00000015602  | EPN1     |
| ENSACAP00000014423 | ENSACAG00000014705  | ENSACAT00000014718  | DLX6     |
| ENSACAP00000004484 | ENSACAG00000004557  | ENSACAT00000004587  |          |
| ENSACAP00000001278 | ENSACAG00000001224  | ENSACAT00000001311  | PPIL2    |
| ENSACAP00000000925 | ENSACAG00000000892  | ENSACAT00000000953  | UFD1L    |
| ENSACAP00000002021 | ENSACAG00000002090  | ENSACAT00000002069  | KIAA0232 |
| ENSACAP00000004779 | ENSACAG00000004791  | ENSACAT00000004887  | PLS1     |
| ENSACAP00000004674 | ENSACAG00000004789  | ENSACAT00000004780  | RWDD3    |
| ENSACAP00000013905 | ENSACAG00000014123  | ENSACAT00000014191  | PDIA4    |
| ENSACAP00000022783 | ENSACAG00000029652  | ENSACAT00000030201  | PIGX     |



|                    |                    |                    |          |
|--------------------|--------------------|--------------------|----------|
| ENSACAP00000001757 | ENSACAG00000001800 | ENSACAT00000001798 |          |
| ENSACAP00000007400 | ENSACAG00000007571 | ENSACAT00000007557 | RPS19BP1 |
| ENSACAP00000009566 | ENSACAG00000009697 | ENSACAT00000009763 | YTHDC1   |
| ENSACAP00000005180 | ENSACAG00000005227 | ENSACAT00000005297 |          |
| ENSACAP00000005095 | ENSACAG00000005215 | ENSACAT00000005210 | XPNPEP3  |
| ENSACAP00000005033 | ENSACAG00000005163 | ENSACAT00000005146 | SFR1     |
| ENSACAP00000011995 | ENSACAG00000012203 | ENSACAT00000012240 | FAM171A2 |
| ENSACAP00000006283 | ENSACAG00000006287 | ENSACAT00000006423 | XPNPEP1  |
| ENSACAP00000014854 | ENSACAG00000015138 | ENSACAT00000015155 | SEPP1    |
| ENSACAP00000013720 | ENSACAG00000013826 | ENSACAT00000014001 | SYT1     |
| ENSACAP00000017010 | ENSACAG00000017228 | ENSACAT00000017345 | SLC4A1   |
| ENSACAP00000000791 | ENSACAG00000000862 | ENSACAT00000000816 | MCU      |
| ENSACAP00000007175 | ENSACAG00000007344 | ENSACAT00000007330 | LRRN2    |
| ENSACAP00000007428 | ENSACAG00000007599 | ENSACAT00000007585 | PPP1R15B |
| ENSACAP00000003054 | ENSACAG00000003149 | ENSACAT00000003132 | PPHLN1   |
| ENSACAP00000002294 | ENSACAG00000002156 | ENSACAT00000002354 | LMO7     |
| ENSACAP00000002037 | ENSACAG00000002035 | ENSACAT00000002086 | UCHL3    |
| ENSACAP00000000748 | ENSACAG00000000689 | ENSACAT00000000772 | GAS6     |
| ENSACAP00000005130 | ENSACAG00000005207 | ENSACAT00000005246 | ADD1     |
| ENSACAP00000006927 | ENSACAG00000007007 | ENSACAT00000007078 | SAMHD1   |
| ENSACAP00000000344 | ENSACAG00000000390 | ENSACAT00000000358 | STS      |
| ENSACAP00000007342 | ENSACAG00000007489 | ENSACAT00000007498 | PRDX4    |
| ENSACAP00000017656 | ENSACAG00000017928 | ENSACAT00000018002 |          |
| ENSACAP00000014951 | ENSACAG00000015209 | ENSACAT00000015254 |          |
| ENSACAP00000002450 | ENSACAG00000002543 | ENSACAT00000002513 | SOD1     |
| ENSACAP00000002268 | ENSACAG00000002352 | ENSACAT00000002328 | SLC25A4  |
| ENSACAP00000010317 | ENSACAG00000010312 | ENSACAT00000010529 | F5       |
| ENSACAP00000016547 | ENSACAG00000016786 | ENSACAT00000016873 | GLRB     |
| ENSACAP00000015388 | ENSACAG00000015617 | ENSACAT00000015701 | FGG      |
| ENSACAP00000012614 | ENSACAG00000012831 | ENSACAT00000012870 | CCDC109B |

|                    |                    |                    |         |
|--------------------|--------------------|--------------------|---------|
| ENSACAP00000012376 | ENSACAG00000012569 | ENSACAT00000012629 | ETNPPL  |
| ENSACAP00000011045 | ENSACAG00000011296 | ENSACAT00000011273 | EMB     |
| ENSACAP00000010244 | ENSACAG00000010314 | ENSACAT00000010455 |         |
| ENSACAP00000010102 | ENSACAG00000010303 | ENSACAT00000010309 | C7      |
| ENSACAP00000016155 | ENSACAG00000016440 | ENSACAT00000016476 | CENPH   |
| ENSACAP00000008740 | ENSACAG00000008942 | ENSACAT00000008928 | GCNT4   |
| ENSACAP00000008820 | ENSACAG00000008991 | ENSACAT00000009010 | KEAP1   |
| ENSACAP00000016373 | ENSACAG00000016619 | ENSACAT00000016697 | SEMA4D  |
| ENSACAP00000000355 | ENSACAG00000000371 | ENSACAT00000000369 | GOLM1   |
| ENSACAP00000008420 | ENSACAG00000008545 | ENSACAT00000008602 | DDX24   |
| ENSACAP00000008929 | ENSACAG00000008987 | ENSACAT00000009120 | LGMN    |
| ENSACAP00000009030 | ENSACAG00000009184 | ENSACAT00000009223 | SLC24A4 |
| ENSACAP00000013202 | ENSACAG00000013365 | ENSACAT00000013466 | GALC    |
| ENSACAP00000016429 | ENSACAG00000016685 | ENSACAT00000016754 | YLPM1   |
| ENSACAP00000015870 | ENSACAG00000016157 | ENSACAT00000016188 | FAM161B |
| ENSACAP00000017274 | ENSACAG00000017477 | ENSACAT00000017614 |         |
| ENSACAP00000012138 | ENSACAG00000012275 | ENSACAT00000012383 | EEF2    |
| ENSACAP00000007715 | ENSACAG00000007871 | ENSACAT00000007880 | GATA1   |
| ENSACAP00000020710 | ENSACAG00000016156 | ENSACAT00000022687 | PAPLN   |
| ENSACAP00000005007 | ENSACAG00000005108 | ENSACAT00000005120 | TRAF6   |
| ENSACAP00000001943 | ENSACAG00000002019 | ENSACAT00000001989 | ARL14EP |
| ENSACAP00000022624 | ENSACAG00000028784 | ENSACAT00000030041 |         |
| ENSACAP00000012439 | ENSACAG00000012658 | ENSACAT00000012693 | PDE3B   |
| ENSACAP00000000060 | ENSACAG00000000061 | ENSACAT00000000061 |         |
| ENSACAP00000015232 | ENSACAG00000015422 | ENSACAT00000015540 | BAIAP2  |
| ENSACAP00000016462 | ENSACAG00000016730 | ENSACAT00000016788 | TK1     |
| ENSACAP00000016553 | ENSACAG00000016808 | ENSACAT00000016879 | HGS     |
| ENSACAP00000013241 | ENSACAG00000013428 | ENSACAT00000013507 | PKP3    |
| ENSACAP00000009525 | ENSACAG00000009732 | ENSACAT00000009722 | DTX3L   |
| ENSACAP00000015851 | ENSACAG00000016117 | ENSACAT00000016168 |         |

|                     |                     |                     |        |
|---------------------|---------------------|---------------------|--------|
| ENSACAP00000009739  | ENSACAG00000009876  | ENSACAT00000009938  | STX3   |
| ENSACAP00000006856  | ENSACAG00000006926  | ENSACAT00000007006  | CTNND1 |
| ENSACAP000000022448 | ENSACAG00000008728  | ENSACAT000000029865 |        |
| ENSACAP00000005899  | ENSACAG00000006044  | ENSACAT00000006028  | ICT1   |
| ENSACAP00000002161  | ENSACAG00000002188  | ENSACAT00000002220  |        |
| ENSACAP000000015946 | ENSACAG000000016212 | ENSACAT000000016264 | SPDL1  |
| ENSACAP00000004891  | ENSACAG00000004938  | ENSACAT00000005003  | RARS   |
| ENSACAP000000010520 | ENSACAG000000010677 | ENSACAT000000010737 | ACADL  |
| ENSACAP00000005561  | ENSACAG00000005569  | ENSACAT00000005683  | CCT4   |
| ENSACAP000000014514 | ENSACAG000000014770 | ENSACAT000000014809 | ITM2B  |
| ENSACAP000000013145 | ENSACAG000000013326 | ENSACAT000000013405 | ADGRF5 |
| ENSACAP000000011424 | ENSACAG000000011554 | ENSACAT000000011663 | PARP3  |
| ENSACAP00000006881  | ENSACAG00000007045  | ENSACAT00000007031  |        |
| ENSACAP000000014132 | ENSACAG000000014404 | ENSACAT000000014422 | MDN1   |
| ENSACAP000000013835 | ENSACAG000000014005 | ENSACAT000000014118 | TXNRD3 |
| ENSACAP000000010811 | ENSACAG000000010996 | ENSACAT000000011035 | RPS5   |
| ENSACAP00000004644  | ENSACAG00000004653  | ENSACAT00000004750  | EZR    |
| ENSACAP00000004996  | ENSACAG00000005018  | ENSACAT00000005109  | SNX9   |
| ENSACAP000000020699 | ENSACAG000000017760 | ENSACAT000000026892 |        |
| ENSACAP000000022351 | ENSACAG00000001489  | ENSACAT000000029768 | TBCE   |
| ENSACAP00000001610  | ENSACAG00000001612  | ENSACAT00000001649  | VEGFA  |
| ENSACAP00000001283  | ENSACAG00000001292  | ENSACAT00000001316  | DIEXF  |
| ENSACAP00000001907  | ENSACAG00000001946  | ENSACAT00000001953  |        |
| ENSACAP00000003297  | ENSACAG00000003328  | ENSACAT00000003380  | MTIF2  |
| ENSACAP00000001611  | ENSACAG00000001550  | ENSACAT00000001650  | NRXN1  |

**Table S3. GO terms associated with PSGs identified on frog branch 7.**

| category | pvalue | numDE<br>InCat | numIn<br>Cat | term | GeneNames |
|----------|--------|----------------|--------------|------|-----------|
|----------|--------|----------------|--------------|------|-----------|

|            |             |    |     |                                                                |                                                                               |
|------------|-------------|----|-----|----------------------------------------------------------------|-------------------------------------------------------------------------------|
| GO:0030198 | 1.37E-05    | 11 | 210 | extracellular matrix organization                              | MMP19,COL1A2,GAS6,PRDX4,FGG,ENSACAG00000017760,NRXN1,NID2,COL3A1,SPINT1,FLOT1 |
| GO:0043062 | 1.47E-05    | 11 | 212 | extracellular structure organization                           | MMP19,COL1A2,GAS6,PRDX4,FGG,ENSACAG00000017760,NRXN1,NID2,COL3A1,SPINT1,FLOT1 |
| GO:0045921 | 1.80E-05    | 6  | 59  | positive regulation of exocytosis                              | FGG,HGS,STX4,AP1G1,PLA2G6,SDCBP                                               |
| GO:0022411 | 5.11E-05    | 9  | 175 | cellular component disassembly                                 | MMP19,ICT1,ENSACAG00000017760,MTIF2,STMN1,C12orf65,TPR,MRPL48,FLOT1           |
| GO:1902896 | 0.000123526 | 2  | 2   | terminal web assembly                                          | PLS1,EZR                                                                      |
| GO:0070126 | 0.000135325 | 3  | 16  | mitochondrial translational termination                        | ICT1,C12orf65,MRPL48                                                          |
| GO:0022406 | 0.000245636 | 5  | 65  | membrane docking                                               | STX3,EZR,NRXN1,STX4,STX12                                                     |
| GO:0001951 | 0.000338055 | 2  | 3   | intestinal D-glucose absorption                                | PLS1,EZR                                                                      |
| GO:0072657 | 0.000363474 | 9  | 233 | protein localization to membrane                               | PPIL2,GAS6,GLRB,HGS,RPS5,NRXN1,RPL13A,SDCBP,FLOT1                             |
| GO:0032984 | 0.000498456 | 5  | 69  | macromolecular complex disassembly                             | ICT1,MTIF2,STMN1,C12orf65,MRPL48                                              |
| GO:1903078 | 0.000560531 | 4  | 41  | positive regulation of protein localization to plasma membrane | PLS1,STX3,EZR,STX4                                                            |
| GO:0034116 | 0.000574935 | 2  | 4   | positive regulation of heterotypic cell-cell adhesion          | FGG,FLOT1                                                                     |
| GO:0006414 | 0.000724099 | 4  | 58  | translational elongation                                       | RPLP1,C12orf65,MRPS18A,MRPL48                                                 |
| GO:0051017 | 0.000734502 | 4  | 40  | actin filament bundle assembly                                 | PLS1,ADD1,BAIAP2,EZR                                                          |
| GO:1903608 | 0.000746964 | 2  | 4   | protein localization to cytoplasmic stress granule             | ENSACAG00000017928,DHX9                                                       |
| GO:0050731 | 0.000846055 | 5  | 76  | positive regulation of peptidyl-tyrosine phosphorylation       | GAS6,SEMA4D,GATA1,CTNND1,VEGFA                                                |
| GO:0097028 | 0.000954023 | 3  | 21  | dendritic cell differentiation                                 | GAS6,GATA1,TRAF6                                                              |
| GO:0036444 | 0.000986709 | 2  | 6   | calcium ion transmembrane import into mitochondrion            | MCU,CCDC109B                                                                  |
| GO:0048278 | 0.001188464 | 4  | 54  | vesicle docking                                                | STX3,NRXN1,STX4,STX12                                                         |
| GO:0035457 | 0.001264808 | 2  | 5   | cellular response to interferon-alpha                          | GAS6,TPR                                                                      |
| GO:0032532 | 0.001352776 | 2  | 5   | regulation of microvillus length                               | PLS1,EZR                                                                      |
| GO:0060627 | 0.001414933 | 10 | 335 | regulation of vesicle-mediated transport                       | GAS6,ENSACAG00000015209,FGG,HGS,EZR,STX4,AP1G1,PLA2G6,SDCBP,FLOT1             |
| GO:0001894 | 0.00214517  | 5  | 95  | tissue homeostasis                                             | ADD1,GATA1,TRAF6,ADGRF5,BBS10                                                 |

|            |             |    |     |                                                                       |                                                                               |
|------------|-------------|----|-----|-----------------------------------------------------------------------|-------------------------------------------------------------------------------|
| GO:0090267 | 0.00224599  | 2  | 7   | positive regulation of mitotic cell cycle spindle assembly checkpoint | TPR,NDC80                                                                     |
| GO:0019083 | 0.002465858 | 3  | 29  | viral transcription                                                   | RPS5,RPL13A,TPR                                                               |
| GO:0033690 | 0.002508122 | 2  | 8   | positive regulation of osteoblast proliferation                       | GATA1,CTHRC1                                                                  |
| GO:0032536 | 0.002716264 | 2  | 7   | regulation of cell projection size                                    | PLS1,EZR                                                                      |
| GO:0051023 | 0.002785628 | 2  | 10  | regulation of immunoglobulin secretion                                | TRAF6,STX4                                                                    |
| GO:0030953 | 0.002896043 | 2  | 8   | astral microtubule organization                                       | EZR,CEP120                                                                    |
| GO:0045454 | 0.002944918 | 4  | 70  | cell redox homeostasis                                                | PDIA4,PRDX4,TXNRD3,PDIA3                                                      |
| GO:0006364 | 0.003306535 | 6  | 165 | rRNA processing                                                       | MDN1,RPS5,DIEXF,RPL13A,NOP56,CIRH1A                                           |
| GO:0006457 | 0.003632197 | 6  | 168 | protein folding                                                       | PPIL2,PDIA4,PRDX4,CCT4,TBCE,PDIA3                                             |
| GO:0097067 | 0.003971133 | 2  | 10  | cellular response to thyroid hormone stimulus                         | COL1A2,GATA1                                                                  |
| GO:0030534 | 0.004090956 | 5  | 105 | adult behavior                                                        | UCHL3,GLRB,TBCE,NRXN1,SPTBN2                                                  |
| GO:0034976 | 0.004370411 | 5  | 112 | response to endoplasmic reticulum stress                              | PDIA4,PPP1R15B,PDIA3,PLA2G6,FLOT1                                             |
| GO:0031629 | 0.004422914 | 2  | 14  | synaptic vesicle fusion to presynaptic active zone membrane           | STX3,STX4                                                                     |
| GO:0030155 | 0.004663163 | 11 | 449 | regulation of cell adhesion                                           | LMO7,ENSACAG00000015209,FGG,SEMA4D,T<br>RAF6,PDE3B,STX3,VEGFA,STX4,THY1,FLOT1 |
| GO:0050806 | 0.005147679 | 4  | 71  | positive regulation of synaptic transmission                          | STX3,NRXN1,STX4,FLOT1                                                         |
| GO:0006413 | 0.005180226 | 4  | 86  | translational initiation                                              | RPS5,MTIF2,RPL13A,MRPS18A                                                     |
| GO:2000106 | 0.005245271 | 3  | 38  | regulation of leukocyte apoptotic process                             | GAS6,ENSACAG00000007230,NOC2L                                                 |
| GO:0072376 | 0.005333605 | 4  | 94  | protein activation cascade                                            | FGG,ENSACAG00000010314,C7,ENSACAG0000<br>0017760                              |
| GO:0032816 | 0.005417496 | 2  | 11  | positive regulation of natural killer cell activation                 | GAS6,AP1G1                                                                    |
| GO:0006851 | 0.005520766 | 2  | 13  | mitochondrial calcium ion transport                                   | MCU,CCDC109B                                                                  |
| GO:0070168 | 0.006118731 | 2  | 14  | negative regulation of biomineral tissue development                  | GAS6,GATA1                                                                    |
| GO:0072344 | 0.006255895 | 1  | 1   | rescue of stalled ribosome                                            | C12orf65                                                                      |
| GO:0090177 | 0.006310985 | 1  | 1   | establishment of planar polarity involved in neural tube closure      | CTHRC1                                                                        |
| GO:1901193 | 0.006365886 | 1  | 1   | regulation of formation of translation preinitiation complex          | RPL13A                                                                        |
| GO:1901194 | 0.006365886 | 1  | 1   | negative regulation of formation of translation                       | RPL13A                                                                        |

|            |             |   |     |                                                                                           |                                                             |
|------------|-------------|---|-----|-------------------------------------------------------------------------------------------|-------------------------------------------------------------|
|            |             |   |     | preinitiation complex                                                                     |                                                             |
| GO:0051560 | 0.006392653 | 2 | 13  | mitochondrial calcium ion homeostasis                                                     | MCU,CCDC109B                                                |
| GO:0002504 | 0.006636416 | 3 | 38  | antigen processing and presentation of peptide or polysaccharide antigen via MHC class II | TRAF6,SPTBN2,AP1G1                                          |
| GO:0007016 | 0.006889169 | 2 | 10  | cytoskeletal anchoring at plasma membrane                                                 | EZR,TLN1                                                    |
| GO:0051764 | 0.006899841 | 2 | 11  | actin crosslink formation                                                                 | PLS1,BAIAP2                                                 |
| GO:1902073 | 0.007487102 | 1 | 1   | positive regulation of hypoxia-inducible factor-1 alpha signaling pathway                 | RWDD3                                                       |
| GO:2000255 | 0.007586801 | 1 | 1   | negative regulation of male germ cell proliferation                                       | PRDX4                                                       |
| GO:0070613 | 0.007664738 | 6 | 185 | regulation of protein processing                                                          | GAS6,ENSACAG00000017928,CTNND1,ENSACAG00000017760,SDCBP,TPR |
| GO:0031424 | 0.007695752 | 2 | 14  | keratinization                                                                            | PPHLN1,PPL                                                  |
| GO:0050860 | 0.007745056 | 2 | 15  | negative regulation of T cell receptor signaling pathway                                  | EZR,THY1                                                    |
| GO:0035455 | 0.007916165 | 2 | 13  | response to interferon-alpha                                                              | GAS6,TPR                                                    |
| GO:0030221 | 0.008208988 | 1 | 1   | basophil differentiation                                                                  | GATA1                                                       |
| GO:0045947 | 0.008336478 | 2 | 15  | negative regulation of translational initiation                                           | RPL13A,TPR                                                  |
| GO:0032481 | 0.008364486 | 3 | 39  | positive regulation of type I interferon production                                       | ENSACAG00000017928,DHX9,FLOT1                               |
| GO:0035786 | 0.008782063 | 1 | 1   | protein complex oligomerization                                                           | MCU                                                         |
| GO:0032846 | 0.009120721 | 5 | 130 | positive regulation of homeostatic process                                                | GATA1,CCT4,STX4,PLA2G6,THY1                                 |
| GO:0018192 | 0.009483328 | 1 | 1   | enzyme active site formation via cysteine modification to L-cysteine persulfide           | MOCS3                                                       |
| GO:0018307 | 0.009483328 | 1 | 1   | enzyme active site formation                                                              | MOCS3                                                       |
| GO:0043254 | 0.00955193  | 8 | 304 | regulation of protein complex assembly                                                    | ADD1,ENSACAG00000017928,SNX9,VEGFA,SPBN2,BBS10,STMN1,TPR    |
| GO:0090274 | 0.009746136 | 1 | 1   | positive regulation of somatostatin secretion                                             | CCKAR                                                       |
| GO:0072378 | 0.009832393 | 1 | 1   | blood coagulation, fibrin clot formation                                                  | FGG                                                         |
| GO:0051262 | 0.009867759 | 4 | 87  | protein tetramerization                                                                   | SAMHD1,TK1,ACADL,NRXN1                                      |
| GO:0097066 | 0.010039924 | 2 | 16  | response to thyroid hormone                                                               | COL1A2,GATA1                                                |
| GO:0040014 | 0.01009789  | 3 | 46  | regulation of multicellular organism growth                                               | PLS1,LGMN,EZR                                               |
| GO:0015993 | 0.010123852 | 1 | 1   | molecular hydrogen transport                                                              | ADHFE1                                                      |
| GO:0060262 | 0.010123852 | 1 | 1   | negative regulation of N-terminal protein palmitoylation                                  | HHATL                                                       |

|            |             |    |     |                                                                        |                                                                                |
|------------|-------------|----|-----|------------------------------------------------------------------------|--------------------------------------------------------------------------------|
| GO:0001554 | 0.010216958 | 1  | 1   | luteolysis                                                             | MMP19                                                                          |
| GO:0060353 | 0.01025318  | 1  | 1   | regulation of cell adhesion molecule production                        | FLOT1                                                                          |
| GO:0006664 | 0.01082641  | 4  | 96  | glycolipid metabolic process                                           | PIGX,STS,GALC,ST3GAL4                                                          |
| GO:1900142 | 0.011053231 | 1  | 1   | negative regulation of oligodendrocyte apoptotic process               | GAS6                                                                           |
| GO:2000533 | 0.011053231 | 1  | 1   | negative regulation of renal albumin absorption                        | GAS6                                                                           |
| GO:0009607 | 0.011346781 | 10 | 483 | response to biotic stimulus                                            | PPP1R15B,SAMHD1,ENSACAG00000017928,TRAF6,BAIAP2,IFNGR1,PTGFR,PLA2G6,STMN1,CKAR |
| GO:0071826 | 0.011403875 | 6  | 206 | ribonucleoprotein complex subunit organization                         | YTHDC1,ENSACAG00000017928,MDN1,RPS5,MTIF2,TGS1                                 |
| GO:0006683 | 0.011427452 | 1  | 1   | galactosylceramide catabolic process                                   | GALC                                                                           |
| GO:1903509 | 0.012155142 | 4  | 99  | liposaccharide metabolic process                                       | PIGX,STS,GALC,ST3GAL4                                                          |
| GO:0060690 | 0.012194482 | 1  | 1   | epithelial cell differentiation involved in salivary gland development | CTNND1                                                                         |
| GO:0036261 | 0.012243751 | 1  | 1   | 7-methylguanosine cap hypermethylation                                 | TGS1                                                                           |
| GO:0070124 | 0.012428638 | 2  | 25  | mitochondrial translational initiation                                 | MTIF2,MRPS18A                                                                  |
| GO:0007596 | 0.013014058 | 4  | 91  | blood coagulation                                                      | GAS6,F5,FGG,GATA1                                                              |
| GO:0050817 | 0.013014058 | 4  | 91  | coagulation                                                            | GAS6,F5,FGG,GATA1                                                              |
| GO:0021692 | 0.014198163 | 1  | 1   | cerebellar Purkinje cell layer morphogenesis                           | SPTBN2                                                                         |
| GO:0000189 | 0.014297621 | 1  | 1   | MAPK import into nucleus                                               | TPR                                                                            |
| GO:0045799 | 0.014297621 | 1  | 1   | positive regulation of chromatin assembly or disassembly               | TPR                                                                            |
| GO:0097327 | 0.01442961  | 1  | 2   | response to antineoplastic agent                                       | PTGR1                                                                          |
| GO:2000352 | 0.015031572 | 2  | 18  | negative regulation of endothelial cell apoptotic process              | GAS6,FGG                                                                       |
| GO:0036260 | 0.015561444 | 2  | 21  | RNA capping                                                            | SUPT5H,TGS1                                                                    |
| GO:0006487 | 0.015596589 | 3  | 56  | protein N-linked glycosylation                                         | ENSACAG00000016117,DPAGT1,ST3GAL4                                              |
| GO:2000677 | 0.015697179 | 2  | 23  | regulation of transcription regulatory region DNA binding              | GATA1,TRAF6                                                                    |
| GO:0090202 | 0.016546139 | 1  | 2   | gene looping                                                           | GATA1                                                                          |
| GO:0090579 | 0.016546139 | 1  | 2   | dsDNA loop formation                                                   | GATA1                                                                          |
| GO:1903898 | 0.016900956 | 1  | 2   | negative regulation of PERK-mediated unfolded protein response         | PPP1R15B                                                                       |
| GO:0019408 | 0.017316345 | 1  | 2   | dolichol biosynthetic process                                          | DPAGT1                                                                         |

|            |             |   |     |                                                               |                                                                        |
|------------|-------------|---|-----|---------------------------------------------------------------|------------------------------------------------------------------------|
| GO:0046061 | 0.017575851 | 1 | 2   | dATP catabolic process                                        | SAMHD1                                                                 |
| GO:1901890 | 0.01843122  | 2 | 20  | positive regulation of cell junction assembly                 | VEGFA,FLOT1                                                            |
| GO:0042758 | 0.018870728 | 1 | 2   | long-chain fatty acid catabolic process                       | ACADL                                                                  |
| GO:0071649 | 0.018888724 | 1 | 2   | regulation of chemokine (C-C motif) ligand 5 production       | ENSACAG00000017928                                                     |
| GO:0000132 | 0.019354169 | 2 | 22  | establishment of mitotic spindle orientation                  | SPDL1,NDC80                                                            |
| GO:0031990 | 0.019439249 | 1 | 2   | mRNA export from nucleus in response to heat stress           | TPR                                                                    |
| GO:0006446 | 0.019832095 | 3 | 59  | regulation of translational initiation                        | ENSACAG00000017928,RPL13A,TPR                                          |
| GO:0090666 | 0.019866267 | 1 | 2   | scaRNA localization to Cajal body                             | CCT4                                                                   |
| GO:0006404 | 0.020042338 | 1 | 2   | RNA import into nucleus                                       | TPR                                                                    |
| GO:0070164 | 0.020368657 | 1 | 2   | negative regulation of adiponectin secretion                  | RAB11FIP1                                                              |
| GO:0033240 | 0.020778374 | 5 | 162 | positive regulation of cellular amine metabolic process       | GAS6,SEMA4D,GATA1,CTNND1,VEGFA                                         |
| GO:0006624 | 0.021416549 | 1 | 3   | vacuolar protein processing                                   | LGMN                                                                   |
| GO:0060988 | 0.021641074 | 1 | 2   | lipid tube assembly                                           | SNX9                                                                   |
| GO:0071167 | 0.021827653 | 1 | 2   | ribonucleoprotein complex import into nucleus                 | TGS1                                                                   |
| GO:1902966 | 0.021893707 | 1 | 2   | positive regulation of protein localization to early endosome | EZR                                                                    |
| GO:0007610 | 0.021909634 | 9 | 417 | behavior                                                      | ENSACAG00000004557,UCHL3,GLRB,GCNT4,TBCE,NRXN1,SPTBN2,PLA2G6,CCKAR     |
| GO:0006412 | 0.021973342 | 5 | 228 | translation                                                   | EEF2,RPS5,RPL13A,RPLP1,MRPS18A                                         |
| GO:0032103 | 0.022339517 | 5 | 173 | positive regulation of response to external stimulus          | GAS6,TRAF6,STX3,STX4,SUPT5H                                            |
| GO:0032870 | 0.022402134 | 6 | 235 | cellular response to hormone stimulus                         | COL1A2,UCHL3,GATA1,PDE3B,PTGFR,CCKAR                                   |
| GO:0043207 | 0.02269421  | 9 | 460 | response to external biotic stimulus                          | SAMHD1,ENSACAG00000017928,TRAF6,BAIAP2,IFNGR1,PTGFR,PLA2G6,STMN1,CCKAR |
| GO:0046813 | 0.022821055 | 1 | 2   | receptor-mediated virion attachment to host cell              | GAS6                                                                   |
| GO:0035701 | 0.022880872 | 1 | 2   | hematopoietic stem cell migration                             | GAS6                                                                   |
| GO:0097241 | 0.022880872 | 1 | 2   | hematopoietic stem cell migration to bone marrow              | GAS6                                                                   |
| GO:0030219 | 0.023003649 | 1 | 3   | megakaryocyte differentiation                                 | GATA1                                                                  |
| GO:0071307 | 0.023046065 | 1 | 2   | cellular response to vitamin K                                | GAS6                                                                   |
| GO:0006643 | 0.023417661 | 5 | 181 | membrane lipid metabolic process                              | PIGX,STS,GALC,ENSACAG00000008728,ST3GAL4                               |



|            |             |   |     |                                                           |                                                    |
|------------|-------------|---|-----|-----------------------------------------------------------|----------------------------------------------------|
| GO:0032066 | 0.024079222 | 1 | 2   | nucleolus to nucleoplasm transport                        | NOC2L                                              |
| GO:0010559 | 0.02408727  | 2 | 28  | regulation of glycoprotein biosynthetic process           | GATA1,ITM2B                                        |
| GO:0032447 | 0.024186519 | 1 | 3   | protein urmylation                                        | MOCS3                                              |
| GO:0032226 | 0.024509395 | 1 | 3   | positive regulation of synaptic transmission, dopaminergi | FLOT1                                              |
| GO:0071873 | 0.024787551 | 1 | 2   | response to norepinephrine                                | COL1A2                                             |
| GO:0060414 | 0.024793881 | 1 | 2   | aorta smooth muscle tissue morphogenesis                  | COL3A1                                             |
| GO:0071799 | 0.0255018   | 1 | 3   | cellular response to prostaglandin D stimulus             | PTGFR                                              |
| GO:0043932 | 0.025551741 | 1 | 3   | ossification involved in bone remodeling                  | CTHRC1                                             |
| GO:0051105 | 0.025675921 | 1 | 3   | regulation of DNA ligation                                | PARP3                                              |
| GO:0051106 | 0.025675921 | 1 | 3   | positive regulation of DNA ligation                       | PARP3                                              |
| GO:1903553 | 0.026042161 | 1 | 3   | positive regulation of extracellular exosome assembly     | SDCBP                                              |
| GO:0010693 | 0.026338126 | 1 | 3   | negative regulation of alkaline phosphatase activity      | SEMA4D                                             |
| GO:0046832 | 0.027332994 | 1 | 2   | negative regulation of RNA export from nucleus            | TPR                                                |
| GO:0044706 | 0.028064917 | 3 | 72  | multi-multicellular organism process                      | EPN1,STS,PTGFR                                     |
| GO:0019254 | 0.028292273 | 1 | 3   | carnitine metabolic process, CoA-linked                   | ACADL                                              |
| GO:0006068 | 0.028397781 | 1 | 3   | ethanol catabolic process                                 | ENSACAG00000008728                                 |
| GO:1901976 | 0.028465277 | 2 | 25  | regulation of cell cycle checkpoint                       | TPR,NDC80                                          |
| GO:1903018 | 0.028680912 | 2 | 31  | regulation of glycoprotein metabolic process              | GATA1,ITM2B                                        |
| GO:0018149 | 0.028949196 | 2 | 26  | peptide cross-linking                                     | COL3A1,ENSACAG00000013226                          |
| GO:0060670 | 0.028966471 | 1 | 4   | branching involved in labyrinthine layer morphogenesis    | SPINT1                                             |
| GO:0006213 | 0.028997134 | 2 | 36  | pyrimidine nucleoside metabolic process                   | TK1,ENSACAG00000002188                             |
| GO:0002143 | 0.029316336 | 1 | 3   | tRNA wobble position uridine thiolation                   | MOCS3                                              |
| GO:0046434 | 0.029741547 | 4 | 124 | organophosphate catabolic process                         | SAMHD1,PDE3B,H6PD,IMPA1                            |
| GO:0034660 | 0.03020518  | 8 | 391 | ncRNA metabolic process                                   | RARS,MDN1,RPS5,DIEXF,RPL13A,MOCS3,NO<br>P56,CIRH1A |
| GO:0019835 | 0.030228888 | 2 | 33  | cytolysis                                                 | ENSACAG00000010314,C7                              |
| GO:0010725 | 0.030268974 | 1 | 3   | regulation of primitive erythrocyte differentiation       | GATA1                                              |
| GO:0034502 | 0.030419879 | 2 | 27  | protein localization to chromosome                        | SPDL1,PARP3                                        |
| GO:0035754 | 0.030605732 | 1 | 3   | B cell chemotaxis                                         | GAS6                                               |
| GO:1900220 | 0.030749112 | 1 | 3   | semaphorin-plexin signaling pathway involved in bone      | SEMA4D                                             |

|            |             |   |     |                                                             |                               |
|------------|-------------|---|-----|-------------------------------------------------------------|-------------------------------|
|            |             |   |     | trabecula morphogenesis                                     |                               |
| GO:0046104 | 0.031181637 | 1 | 4   | thymidine metabolic process                                 | TK1                           |
| GO:1902476 | 0.031610307 | 2 | 26  | chloride transmembrane transport                            | SLC4A1,GLRB                   |
| GO:0097112 | 0.032237825 | 1 | 3   | gamma-aminobutyric acid receptor clustering                 | GLRB                          |
| GO:0070972 | 0.032508198 | 2 | 35  | protein localization to endoplasmic reticulum               | RPS5,RPL13A                   |
| GO:0006420 | 0.032869537 | 1 | 3   | arginyl-tRNA aminoacylation                                 | RARS                          |
| GO:2000535 | 0.033238063 | 1 | 3   | regulation of entry of bacterium into host cell             | EXOC2                         |
| GO:0070508 | 0.033435797 | 1 | 4   | cholesterol import                                          | STARD5                        |
| GO:0034227 | 0.033578292 | 1 | 4   | tRNA thio-modification                                      | MOCS3                         |
| GO:0060689 | 0.033952584 | 1 | 3   | cell differentiation involved in salivary gland development | CTNND1                        |
| GO:0030865 | 0.034034553 | 2 | 29  | cortical cytoskeleton organization                          | PLS1,EZR                      |
| GO:0042773 | 0.034158812 | 1 | 7   | ATP synthesis coupled electron transport                    | ENSACAG00000007045            |
| GO:1903650 | 0.034514631 | 3 | 78  | negative regulation of cytoplasmic transport                | GAS6,KEAP1,TPR                |
| GO:0090037 | 0.034740194 | 1 | 4   | positive regulation of protein kinase C signaling           | PLA2G6                        |
| GO:0003014 | 0.034874362 | 3 | 75  | renal system process                                        | XPNPEP3,GAS6,LGMN             |
| GO:0045838 | 0.035450545 | 2 | 28  | positive regulation of membrane potential                   | NRXN1,ENSACAG00000025807      |
| GO:0043951 | 0.03554311  | 1 | 4   | negative regulation of cAMP-mediated signaling              | PDE3B                         |
| GO:0006839 | 0.036368332 | 3 | 88  | mitochondrial transport                                     | MCU,CCDC109B,MTX1             |
| GO:0050878 | 0.036371799 | 5 | 184 | regulation of body fluid levels                             | GAS6,F5,FGG,GATA1,CCKAR       |
| GO:0010815 | 0.037425996 | 1 | 4   | bradykinin catabolic process                                | XPNPEP1                       |
| GO:0010737 | 0.037471364 | 1 | 4   | protein kinase A signaling                                  | EZR                           |
| GO:0070262 | 0.038386062 | 1 | 4   | peptidyl-serine dephosphorylation                           | PPP1R15B                      |
| GO:0006700 | 0.042218761 | 1 | 5   | C21-steroid hormone biosynthetic process                    | STARD5                        |
| GO:0051098 | 0.042249583 | 5 | 207 | regulation of binding                                       | ADD1,GATA1,TRAF6,CTHRC1,FLOT1 |
| GO:1903753 | 0.042644473 | 1 | 4   | negative regulation of p38MAPK cascade                      | EZR                           |
| GO:0090154 | 0.043335707 | 1 | 4   | positive regulation of sphingolipid biosynthetic process    | PLA2G6                        |
| GO:0044406 | 0.043348959 | 1 | 4   | adhesion of symbiont to host                                | GAS6                          |
| GO:0033227 | 0.043770372 | 1 | 4   | dsRNA transport                                             | FLOT1                         |
| GO:0030574 | 0.044604237 | 2 | 32  | collagen catabolic process                                  | MMP19,COL3A1                  |

|            |             |   |     |                                                               |                                      |
|------------|-------------|---|-----|---------------------------------------------------------------|--------------------------------------|
| GO:0033238 | 0.04471057  | 6 | 269 | regulation of cellular amine metabolic process                | GAS6,SEMA4D,GATA1,CTNND1,VEGFA,NOC2L |
| GO:0009120 | 0.045226967 | 1 | 6   | deoxyribonucleoside metabolic process                         | TK1                                  |
| GO:0006228 | 0.045273109 | 1 | 7   | UTP biosynthetic process                                      | ENSACAG00000002188                   |
| GO:0070934 | 0.046025855 | 1 | 4   | CRD-mediated mRNA stabilization                               | DHX9                                 |
| GO:0006273 | 0.046341283 | 1 | 4   | lagging strand elongation                                     | PARP3                                |
| GO:0034141 | 0.046805253 | 1 | 5   | positive regulation of toll-like receptor 3 signaling pathway | FLOT1                                |
| GO:0010825 | 0.046890003 | 1 | 4   | positive regulation of centrosome duplication                 | CEP120                               |
| GO:2000270 | 0.047316335 | 1 | 5   | negative regulation of fibroblast apoptotic process           | GAS6                                 |
| GO:0006102 | 0.048876096 | 1 | 5   | isocitrate metabolic process                                  | IDH3B                                |
| GO:0015749 | 0.049079512 | 2 | 35  | monosaccharide transport                                      | PLS1,EZR                             |
| GO:0090237 | 0.049404779 | 1 | 5   | regulation of arachidonic acid secretion                      | PLA2G6                               |

**Table S4. PSGs identified on branch 3 of frog.**

| Ensembl Prot ID     | Ensembl Gene ID     | Ensembl Trans ID    | HNGC Name |
|---------------------|---------------------|---------------------|-----------|
| ENSACAP00000003956  | ENSACAG00000004065  | ENSACAT00000004048  | RPL35     |
| ENSACAP000000012390 | ENSACAG000000012619 | ENSACAT000000012643 | HSPG2     |
| ENSACAP000000013434 | ENSACAG000000013691 | ENSACAT000000013708 |           |
| ENSACAP000000013792 | ENSACAG000000014064 | ENSACAT000000014074 | NEURL2    |
| ENSACAP000000013812 | ENSACAG000000014065 | ENSACAT000000014094 | TMCC1     |
| ENSACAP00000005559  | ENSACAG00000005630  | ENSACAT00000005681  | CHRN3     |
| ENSACAP000000014692 | ENSACAG000000014974 | ENSACAT000000014992 | THUMP3    |
| ENSACAP00000004154  | ENSACAG00000004291  | ENSACAT00000004253  |           |
| ENSACAP000000011545 | ENSACAG000000011710 | ENSACAT000000011785 | POLD2     |
| ENSACAP00000008525  | ENSACAG00000008687  | ENSACAT00000008708  | BRAT1     |
| ENSACAP00000004794  | ENSACAG00000004894  | ENSACAT00000004902  | MFSD2A    |
| ENSACAP00000002842  | ENSACAG00000002932  | ENSACAT00000002912  | TPRG1     |
| ENSACAP000000013942 | ENSACAG000000014212 | ENSACAT000000014228 |           |

|                    |                    |                    |         |
|--------------------|--------------------|--------------------|---------|
| ENSACAP0000000982  | ENSACAG0000000996  | ENSACAT00000001010 | DTX2    |
| ENSACAP00000016819 | ENSACAG00000017064 | ENSACAT00000017151 |         |
| ENSACAP00000008893 | ENSACAG00000009051 | ENSACAT00000009084 | LMBRD2  |
| ENSACAP00000002580 | ENSACAG00000002517 | ENSACAT00000002646 | CLK2    |
| ENSACAP00000012114 | ENSACAG00000012194 | ENSACAT00000012359 | MTTP    |
| ENSACAP00000010546 | ENSACAG00000010745 | ENSACAT00000010764 | DCTPP1  |
| ENSACAP00000009363 | ENSACAG00000009471 | ENSACAT00000009558 | TBC1D31 |
| ENSACAP00000007441 | ENSACAG00000007546 | ENSACAT00000007598 | CLSTN3  |
| ENSACAP00000007914 | ENSACAG00000007857 | ENSACAT00000008080 |         |
| ENSACAP00000008105 | ENSACAG00000008210 | ENSACAT00000008277 | WDR3    |
| ENSACAP00000008869 | ENSACAG00000008837 | ENSACAT00000008896 | KATNB1  |
| ENSACAP00000019188 | ENSACAG00000005871 | ENSACAT00000026240 | SIN3A   |
| ENSACAP00000006456 | ENSACAG00000006462 | ENSACAT00000006601 |         |
| ENSACAP00000007546 | ENSACAG00000007711 | ENSACAT00000007707 | RNF149  |
| ENSACAP00000011651 | ENSACAG00000011733 | ENSACAT00000011891 | VCP     |
| ENSACAP00000008583 | ENSACAG00000008720 | ENSACAT00000008766 | LPCAT4  |
| ENSACAP00000021749 | ENSACAG00000028691 | ENSACAT00000029169 |         |
| ENSACAP00000008647 | ENSACAG00000008819 | ENSACAT00000008831 | RBMX2   |
| ENSACAP00000016617 | ENSACAG00000016855 | ENSACAT00000016944 | TNFAIP3 |
| ENSACAP00000008691 | ENSACAG00000008854 | ENSACAT00000008877 | ALG3    |
| ENSACAP00000019661 | ENSACAG00000028065 | ENSACAT00000026241 | IFNGR1  |
| ENSACAP00000006555 | ENSACAG00000006702 | ENSACAT00000006700 | IYD     |
| ENSACAP00000023167 | ENSACAG00000028678 | ENSACAT00000030587 | EGFL7   |
| ENSACAP00000007253 | ENSACAG00000007287 | ENSACAT00000007408 | STX4    |
| ENSACAP00000000220 | ENSACAG00000000210 | ENSACAT00000000225 | PSMD12  |
| ENSACAP00000006502 | ENSACAG00000006445 | ENSACAT00000006647 |         |
| ENSACAP00000000442 | ENSACAG00000000515 | ENSACAT00000000459 | POLRMT  |
| ENSACAP00000017567 | ENSACAG00000017843 | ENSACAT00000017913 |         |
| ENSACAP00000009180 | ENSACAG00000009367 | ENSACAT00000009373 |         |
| ENSACAP00000004108 | ENSACAG00000004206 | ENSACAT00000004205 |         |

|                     |                     |                     |           |
|---------------------|---------------------|---------------------|-----------|
| ENSACAP00000004168  | ENSACAG00000004303  | ENSACAT00000004267  | ANKRD53   |
| ENSACAP000000015218 | ENSACAG000000015364 | ENSACAT000000015526 |           |
| ENSACAP000000015407 | ENSACAG000000015669 | ENSACAT000000015720 | TMLHE     |
| ENSACAP000000006828 | ENSACAG000000006962 | ENSACAT000000006978 | PCYT1A    |
| ENSACAP000000000221 | ENSACAG000000000233 | ENSACAT000000000226 | RAB11FIP1 |
| ENSACAP000000022899 | ENSACAG000000011799 | ENSACAT000000030317 |           |
| ENSACAP000000017999 | ENSACAG000000027397 | ENSACAT000000022186 | SART1     |
| ENSACAP000000008010 | ENSACAG000000007949 | ENSACAT000000008181 | EPHB3     |
| ENSACAP000000002433 | ENSACAG000000002419 | ENSACAT000000002496 | ATXN2     |
| ENSACAP000000005827 | ENSACAG000000005943 | ENSACAT000000005956 | STIL      |
| ENSACAP000000010827 | ENSACAG000000010909 | ENSACAT000000011051 | RAD21     |
| ENSACAP000000011005 | ENSACAG000000011204 | ENSACAT000000011233 | PECAM1    |
| ENSACAP000000004033 | ENSACAG000000003913 | ENSACAT000000004125 |           |
| ENSACAP000000008903 | ENSACAG000000009009 | ENSACAT000000009094 | THOC5     |
| ENSACAP000000006543 | ENSACAG000000006538 | ENSACAT000000006688 | CLUH      |
| ENSACAP000000008137 | ENSACAG000000008305 | ENSACAT000000008309 | EIF5B     |
| ENSACAP000000001566 | ENSACAG000000001034 | ENSACAT000000001603 |           |
| ENSACAP000000017866 | ENSACAG000000020943 | ENSACAT000000021176 |           |
| ENSACAP000000008163 | ENSACAG000000008273 | ENSACAT000000008338 | RHCG      |
| ENSACAP000000015047 | ENSACAG000000015242 | ENSACAT000000015351 | MYO1E     |
| ENSACAP000000012786 | ENSACAG000000013018 | ENSACAT000000013042 |           |
| ENSACAP000000014702 | ENSACAG000000014883 | ENSACAT000000015003 | LIPC      |
| ENSACAP000000015231 | ENSACAG000000015062 | ENSACAT000000015539 | COL3A1    |
| ENSACAP000000001369 | ENSACAG000000001473 | ENSACAT000000001402 | LYSMD2    |
| ENSACAP000000014072 | ENSACAG000000014329 | ENSACAT000000014360 | SAV1      |
| ENSACAP000000015858 | ENSACAG000000016142 | ENSACAT000000016175 | NIPAL2    |
| ENSACAP000000007239 | ENSACAG000000007354 | ENSACAT000000007394 | FAM114A1  |
| ENSACAP000000011352 | ENSACAG000000011361 | ENSACAT000000011591 | MAPK8     |
| ENSACAP000000002210 | ENSACAG000000002308 | ENSACAT000000002270 | TMEM208   |
| ENSACAP000000003768 | ENSACAG000000003791 | ENSACAT000000003860 | PGM2L1    |

|                    |                    |                    |          |
|--------------------|--------------------|--------------------|----------|
| ENSACAP00000015715 | ENSACAG00000015982 | ENSACAT00000016030 | GLOD4    |
| ENSACAP00000013502 | ENSACAG00000013773 | ENSACAT00000013780 | MEGF9    |
| ENSACAP00000001641 | ENSACAG00000001557 | ENSACAT00000001680 |          |
| ENSACAP00000014578 | ENSACAG00000014729 | ENSACAT00000014873 | SCARB1   |
| ENSACAP00000010109 | ENSACAG00000010260 | ENSACAT00000010316 |          |
| ENSACAP00000021570 | ENSACAG00000026480 | ENSACAT00000025303 | MEN1     |
| ENSACAP00000008354 | ENSACAG00000008521 | ENSACAT00000008535 | COMTD1   |
| ENSACAP00000017732 | ENSACAG00000018003 | ENSACAT00000018080 | FGFR1    |
| ENSACAP00000003539 | ENSACAG00000003568 | ENSACAT00000003627 | YARS     |
| ENSACAP00000014871 | ENSACAG00000015065 | ENSACAT00000015172 |          |
| ENSACAP00000011812 | ENSACAG00000012065 | ENSACAT00000012056 | ZNF598   |
| ENSACAP00000007387 | ENSACAG00000007529 | ENSACAT00000007543 | UPP2     |
| ENSACAP00000004064 | ENSACAG00000003987 | ENSACAT00000004158 | NUP107   |
| ENSACAP00000007135 | ENSACAG00000007220 | ENSACAT00000007290 | SFSWAP   |
| ENSACAP00000013183 | ENSACAG00000013293 | ENSACAT00000013446 | VPS35    |
| ENSACAP00000001626 | ENSACAG00000001638 | ENSACAT00000001665 | ZC3HC1   |
| ENSACAP00000014368 | ENSACAG00000014635 | ENSACAT00000014661 | CCKAR    |
| ENSACAP00000003183 | ENSACAG00000003205 | ENSACAT00000003264 | CLINT1   |
| ENSACAP00000003035 | ENSACAG00000003142 | ENSACAT00000003113 |          |
| ENSACAP00000006720 | ENSACAG00000006862 | ENSACAT00000006866 | KREMEN2  |
| ENSACAP00000003383 | ENSACAG00000003402 | ENSACAT00000003466 | ATP1A1   |
| ENSACAP00000019138 | ENSACAG00000022604 | ENSACAT00000026439 | C19orf44 |
| ENSACAP00000000934 | ENSACAG00000000955 | ENSACAT00000000962 | QSOX1    |
| ENSACAP00000006842 | ENSACAG00000006941 | ENSACAT00000006992 | MYOF     |
| ENSACAP00000006605 | ENSACAG00000006744 | ENSACAT00000006751 | TRIM69   |
| ENSACAP00000002372 | ENSACAG00000002358 | ENSACAT00000002433 | UFL1     |
| ENSACAP00000005274 | ENSACAG00000005411 | ENSACAT00000005391 |          |
| ENSACAP00000003827 | ENSACAG00000003867 | ENSACAT00000003919 |          |
| ENSACAP00000015125 | ENSACAG00000015348 | ENSACAT00000015431 | SERPINC1 |
| ENSACAP00000016661 | ENSACAG00000016931 | ENSACAT00000016990 | ECHDC3   |

|                    |                    |                    |          |
|--------------------|--------------------|--------------------|----------|
| ENSACAP0000008624  | ENSACAG0000008771  | ENSACAT0000008807  | CTSK     |
| ENSACAP0000005035  | ENSACAG0000005162  | ENSACAT0000005148  | SLC39A9  |
| ENSACAP0000003528  | ENSACAG0000003614  | ENSACAT0000003616  | KDM8     |
| ENSACAP0000003497  | ENSACAG0000003591  | ENSACAT0000003584  | NSMCE1   |
| ENSACAP0000009331  | ENSACAG0000009549  | ENSACAT0000009526  | TRAFD1   |
| ENSACAP00000011360 | ENSACAG00000011582 | ENSACAT00000011599 | NSRP1    |
| ENSACAP00000002479 | ENSACAG00000002556 | ENSACAT00000002543 | SLC25A1  |
| ENSACAP00000002155 | ENSACAG00000002257 | ENSACAT00000002214 | SERPIND1 |
| ENSACAP00000012440 | ENSACAG00000012624 | ENSACAT00000012694 | FGD4     |
| ENSACAP00000013049 | ENSACAG00000013246 | ENSACAT00000013308 | DFNA5    |
| ENSACAP00000020564 | ENSACAG00000012196 | ENSACAT00000022834 | IL17RA   |
| ENSACAP00000012275 | ENSACAG00000012534 | ENSACAT00000012527 | BID      |
| ENSACAP00000010278 | ENSACAG00000010474 | ENSACAT00000010490 | FAM173B  |
| ENSACAP00000016170 | ENSACAG00000016374 | ENSACAT00000016491 | PAH      |
| ENSACAP00000016035 | ENSACAG00000016283 | ENSACAT00000016355 | NT5DC3   |
| ENSACAP00000005316 | ENSACAG00000005406 | ENSACAT00000005433 | BCAR3    |
| ENSACAP00000023463 | ENSACAG00000028687 | ENSACAT00000030883 | COA1     |
| ENSACAP00000016238 | ENSACAG00000016387 | ENSACAT00000016561 | MYH9     |
| ENSACAP00000009495 | ENSACAG00000009576 | ENSACAT00000009692 | SDHA     |
| ENSACAP00000022842 | ENSACAG00000029076 | ENSACAT00000030260 | UBE2U    |
| ENSACAP00000002239 | ENSACAG00000002353 | ENSACAT00000002299 |          |
| ENSACAP00000004463 | ENSACAG00000004508 | ENSACAT00000004564 | XRCC6    |
| ENSACAP00000011537 | ENSACAG00000011671 | ENSACAT00000011777 | UTP20    |
| ENSACAP00000003683 | ENSACAG00000003767 | ENSACAT00000003773 | COX15    |
| ENSACAP00000013158 | ENSACAG00000013337 | ENSACAT00000013420 | NEDD1    |
| ENSACAP00000013146 | ENSACAG00000013339 | ENSACAT00000013406 | CDC20    |
| ENSACAP00000003866 | ENSACAG00000003954 | ENSACAT00000003958 | SLF2     |
| ENSACAP00000004166 | ENSACAG00000004270 | ENSACAT00000004265 | SFXN2    |
| ENSACAP00000012479 | ENSACAG00000012654 | ENSACAT00000012735 | CEP83    |
| ENSACAP00000022859 | ENSACAG00000028815 | ENSACAT00000030277 |          |

|                     |                     |                     |          |
|---------------------|---------------------|---------------------|----------|
| ENSACAP00000001925  | ENSACAG00000001984  | ENSACAT00000001971  |          |
| ENSACAP00000001433  | ENSACAG00000001470  | ENSACAT00000001468  | SAR1A    |
| ENSACAP000000021784 | ENSACAG000000029340 | ENSACAT000000029204 |          |
| ENSACAP000000010524 | ENSACAG000000010708 | ENSACAT000000010741 | COQ2     |
| ENSACAP000000007398 | ENSACAG000000007567 | ENSACAT000000007555 | PWWP2B   |
| ENSACAP000000013947 | ENSACAG000000013863 | ENSACAT000000014233 | CNTN2    |
| ENSACAP000000017296 | ENSACAG000000017564 | ENSACAT000000017636 | LHPP     |
| ENSACAP000000017591 | ENSACAG000000017868 | ENSACAT000000017937 | KRT19    |
| ENSACAP000000017690 | ENSACAG000000017967 | ENSACAT000000018038 | COASY    |
| ENSACAP000000007406 | ENSACAG000000007498 | ENSACAT000000007563 | SRCIN1   |
| ENSACAP000000007271 | ENSACAG000000007418 | ENSACAT000000007427 | SOCS7    |
| ENSACAP000000006596 | ENSACAG000000006686 | ENSACAT000000006742 | CDK5RAP3 |
| ENSACAP000000002933 | ENSACAG000000002988 | ENSACAT000000003009 | IRAK4    |
| ENSACAP000000000530 | ENSACAG000000000608 | ENSACAT000000000548 | FBXL3    |
| ENSACAP000000023290 | ENSACAG000000000535 | ENSACAT000000030710 | CLN5     |
| ENSACAP000000007005 | ENSACAG000000007124 | ENSACAT000000007156 | TSPAN12  |
| ENSACAP000000013144 | ENSACAG000000013334 | ENSACAT000000013404 |          |
| ENSACAP000000002048 | ENSACAG000000002091 | ENSACAT000000002100 |          |
| ENSACAP000000014988 | ENSACAG000000015240 | ENSACAT000000015291 | FKBP4    |
| ENSACAP000000011603 | ENSACAG000000011834 | ENSACAT000000011843 | GTPBP6   |
| ENSACAP000000010489 | ENSACAG000000010668 | ENSACAT000000010705 |          |
| ENSACAP000000020940 | ENSACAG000000026925 | ENSACAT000000027411 | PRR5     |
| ENSACAP000000015617 | ENSACAG000000015897 | ENSACAT000000015931 | MCAT     |
| ENSACAP00000001089  | ENSACAG000000011195 | ENSACAT000000011118 | UCMA     |
| ENSACAP000000006202 | ENSACAG000000006348 | ENSACAT000000006339 | FGL2     |
| ENSACAP000000006508 | ENSACAG000000006548 | ENSACAT000000006653 | DNAJC2   |
| ENSACAP000000005078 | ENSACAG000000005168 | ENSACAT000000005193 | OGFR     |
| ENSACAP000000002892 | ENSACAG000000002948 | ENSACAT000000002963 | RSPH1    |
| ENSACAP000000005315 | ENSACAG000000005453 | ENSACAT000000005432 | HMGN1    |
| ENSACAP000000009134 | ENSACAG000000009269 | ENSACAT000000009327 |          |



|                    |                    |                    |          |
|--------------------|--------------------|--------------------|----------|
| ENSACAP0000002583  | ENSACAG0000002694  | ENSACAT0000002649  | CENPU    |
| ENSACAP0000006815  | ENSACAG0000006976  | ENSACAT0000006965  | CDKN2AIP |
| ENSACAP00000010317 | ENSACAG00000010312 | ENSACAT00000010529 | F5       |
| ENSACAP00000016585 | ENSACAG00000016828 | ENSACAT00000016911 | PDGFC    |
| ENSACAP00000015388 | ENSACAG00000015617 | ENSACAT00000015701 | FGG      |
| ENSACAP0000004913  | ENSACAG0000004925  | ENSACAT0000005026  | HSPH1    |
| ENSACAP00000010079 | ENSACAG00000010236 | ENSACAT00000010286 | PRKAA1   |
| ENSACAP00000010113 | ENSACAG00000010254 | ENSACAT00000010321 | RAD17    |
| ENSACAP0000000778  | ENSACAG0000000768  | ENSACAT0000000802  | SYK      |
| ENSACAP0000001366  | ENSACAG0000001474  | ENSACAT0000001399  | RMI1     |
| ENSACAP00000011838 | ENSACAG00000011929 | ENSACAT00000012082 | ANXA1    |
| ENSACAP00000018554 | ENSACAG00000027513 | ENSACAT00000026625 | PTAR1    |
| ENSACAP0000002264  | ENSACAG0000002328  | ENSACAT0000002324  | BAZ1A    |
| ENSACAP00000017072 | ENSACAG00000017316 | ENSACAT00000017407 | PTBP3    |
| ENSACAP0000005965  | ENSACAG0000006091  | ENSACAT0000006099  | MBD1     |
| ENSACAP00000013028 | ENSACAG00000013258 | ENSACAT00000013287 | SYNE3    |
| ENSACAP0000006487  | ENSACAG0000006636  | ENSACAT0000006632  | ABT1     |
| ENSACAP0000007334  | ENSACAG0000007259  | ENSACAT0000007490  | MYO1A    |
| ENSACAP00000015102 | ENSACAG00000015347 | ENSACAT00000015406 | CARM1    |
| ENSACAP0000008096  | ENSACAG0000008220  | ENSACAT0000008268  | IDH3G    |
| ENSACAP0000004222  | ENSACAG0000004323  | ENSACAT0000004321  | CD44     |
| ENSACAP0000009049  | ENSACAG0000009213  | ENSACAT0000009242  | SWAP70   |
| ENSACAP00000014302 | ENSACAG00000014575 | ENSACAT00000014595 | COG1     |
| ENSACAP00000015327 | ENSACAG00000015535 | ENSACAT00000015640 |          |
| ENSACAP00000015926 | ENSACAG00000016215 | ENSACAT00000016244 | CANT1    |
| ENSACAP00000017147 | ENSACAG00000017398 | ENSACAT00000017484 | ELAC2    |
| ENSACAP00000010337 | ENSACAG00000010381 | ENSACAT00000010550 | KALRN    |
| ENSACAP0000002909  | ENSACAG0000002906  | ENSACAT0000002983  | STK36    |
| ENSACAP0000001599  | ENSACAG0000001693  | ENSACAT0000001638  | CATIP    |
| ENSACAP0000008204  | ENSACAG0000008383  | ENSACAT0000008380  | RHBDF2   |

|                     |                     |                     |          |
|---------------------|---------------------|---------------------|----------|
| ENSACAP00000006565  | ENSACAG00000006658  | ENSACAT00000006710  | OSBP     |
| ENSACAP00000006131  | ENSACAG00000006230  | ENSACAT00000006268  | NUP85    |
| ENSACAP00000001558  | ENSACAG00000001586  | ENSACAT00000001595  | LUC7L3   |
| ENSACAP000000012577 | ENSACAG000000012718 | ENSACAT000000012833 | CYP27A1  |
| ENSACAP000000021704 | ENSACAG000000028511 | ENSACAT000000029124 | MAT2B    |
| ENSACAP000000010845 | ENSACAG000000010914 | ENSACAT000000011070 | MAP2     |
| ENSACAP000000015745 | ENSACAG000000016013 | ENSACAT000000016061 | TYW5     |
| ENSACAP000000018355 | ENSACAG000000022605 | ENSACAT000000024982 | AFF4     |
| ENSACAP000000018017 | ENSACAG000000022125 | ENSACAT000000025587 |          |
| ENSACAP00000000516  | ENSACAG00000000582  | ENSACAT00000000534  | SNRPB2   |
| ENSACAP00000004973  | ENSACAG00000005105  | ENSACAT00000005086  | KBTBD11  |
| ENSACAP00000002004  | ENSACAG000000002121 | ENSACAT000000002052 | NDUFAF4  |
| ENSACAP000000014132 | ENSACAG000000014404 | ENSACAT000000014422 | MDN1     |
| ENSACAP00000006046  | ENSACAG00000006164  | ENSACAT00000006180  | CEP57L1  |
| ENSACAP00000002361  | ENSACAG00000002472  | ENSACAT00000002421  | SLC25A26 |
| ENSACAP000000020059 | ENSACAG000000024948 | ENSACAT000000028463 |          |
| ENSACAP00000000649  | ENSACAG00000000731  | ENSACAT00000000669  | NTPCR    |
| ENSACAP00000002778  | ENSACAG00000002876  | ENSACAT00000002848  | RHOA     |
| ENSACAP00000009136  | ENSACAG00000009345  | ENSACAT00000009329  | TRMT61B  |
| ENSACAP00000006218  | ENSACAG00000006189  | ENSACAT00000006356  | PARP1    |

**Table S5. GO terms associated with PSGs identified on frog branch 3.**

| category   | pvalue      | numDE<br>InCat | numIn<br>Cat | term                   | GeneNames                                                           |
|------------|-------------|----------------|--------------|------------------------|---------------------------------------------------------------------|
| GO:0050900 | 0.000156213 | 8              | 130          | leukocyte migration    | IL17RA,MYH9,IRAK4,SYK,ANXA1,<br>NUP85,ENSACAG00000006445,PECA<br>M1 |
| GO:0045056 | 0.000224823 | 3              | 11           | transcytosis           | MFSD2A,MYO1A,VPS35                                                  |
| GO:0000967 | 0.000515004 | 2              | 3            | rRNA 5'-end processing | UTP20,ABT1                                                          |

|            |             |    |     |                                                                                                    |                                                                                  |
|------------|-------------|----|-----|----------------------------------------------------------------------------------------------------|----------------------------------------------------------------------------------|
| GO:0071539 | 0.001205419 | 3  | 16  | protein localization to centrosome                                                                 | NEDD1,CEP83,STIL                                                                 |
| GO:0000480 | 0.001392886 | 2  | 5   | endonucleolytic cleavage in 5'-ETS of tricistronic rRNA transcript (SSU-rRNA, 5.8S rRNA, LSU-rRNA) | UTP20,ABT1                                                                       |
| GO:0090502 | 0.002111447 | 3  | 22  | RNA phosphodiester bond hydrolysis, endonucleolytic                                                | UTP20,ABT1,ELAC2                                                                 |
| GO:0002888 | 0.002434923 | 2  | 7   | positive regulation of myeloid leukocyte mediated immunity                                         | SYK,STX4                                                                         |
| GO:0000966 | 0.002659431 | 2  | 6   | RNA 5'-end processing                                                                              | UTP20,ABT1                                                                       |
| GO:0009314 | 0.00307453  | 10 | 315 | response to radiation                                                                              | XRCC6,FBXL3,PRKAA1,CLK2,ENSA<br>CAG00000013018,COL3A1,MAPK8,M<br>EN1,CCKAR,BRAT1 |
| GO:0061041 | 0.003305387 | 5  | 84  | regulation of wound healing                                                                        | SERPINC1,FGG,SYK,ANXA1,TNFAI<br>P3                                               |
| GO:0008535 | 0.004100155 | 2  | 15  | respiratory chain complex IV assembly                                                              | COA1,COX15                                                                       |
| GO:0010677 | 0.00418769  | 3  | 29  | negative regulation of cellular carbohydrate metabolic process                                     | ENSACAG00000002091,ENSACAG00<br>000022125,CLK2                                   |
| GO:0030224 | 0.004302506 | 2  | 9   | monocyte differentiation                                                                           | MYH9,THOC5                                                                       |
| GO:0000959 | 0.004366188 | 3  | 27  | mitochondrial RNA metabolic process                                                                | ELAC2,TRMT61B,POLRMT                                                             |
| GO:1901264 | 0.005226316 | 3  | 31  | carbohydrate derivative transport                                                                  | MFSD2A,SLC25A26,SCARB1                                                           |
| GO:0022618 | 0.005965142 | 7  | 199 | ribonucleoprotein complex assembly                                                                 | ABT1,LUC7L3,MDN1,SART1,ATXN2<br>,ENSACAG00000010260,SFSWAP                       |
| GO:1902041 | 0.006169899 | 3  | 34  | regulation of extrinsic apoptotic signaling pathway via death domain receptors                     | FGG,TNFAIP3,STX4                                                                 |
| GO:1903039 | 0.00625169  | 5  | 110 | positive regulation of leukocyte cell-cell adhesion                                                | HSPH1,SYK,ANXA1,ENSACAG0000<br>0009367,SART1                                     |
| GO:0015931 | 0.006275891 | 6  | 141 | nucleobase-containing compound transport                                                           | ENSACAG00000002091,NUP85,SLC2<br>5A26,RBMX2,THOC5,NUP107                         |
| GO:0048261 | 0.006318216 | 2  | 10  | negative regulation of receptor-mediated endocytosis                                               | ENSACAG00000011799,ATXN2                                                         |
| GO:0051028 | 0.00696084  | 5  | 102 | mRNA transport                                                                                     | ENSACAG00000002091,NUP85,RBM<br>X2,THOC5,NUP107                                  |
| GO:0071826 | 0.007528466 | 7  | 206 | ribonucleoprotein complex subunit organization                                                     | ABT1,LUC7L3,MDN1,SART1,ATXN2<br>,ENSACAG00000010260,SFSWAP                       |
| GO:0006694 | 0.00759435  | 5  | 108 | steroid biosynthetic process                                                                       | PRKAA1,CYP27A1,MAT2B,SCARB1,<br>ENSACAG00000003142                               |

|            |             |    |     |                                                                                 |                                                                                     |
|------------|-------------|----|-----|---------------------------------------------------------------------------------|-------------------------------------------------------------------------------------|
| GO:0044380 | 0.007702217 | 3  | 31  | protein localization to cytoskeleton                                            | NEDD1,CEP83,STIL                                                                    |
| GO:0042752 | 0.007851063 | 4  | 64  | regulation of circadian rhythm                                                  | FBXL3,PRKAA1,SIN3A,MAPK8                                                            |
| GO:0050992 | 0.007946335 | 1  | 1   | dimethylallyl diphosphate biosynthetic process                                  | ENSACAG00000003142                                                                  |
| GO:0050993 | 0.007946335 | 1  | 1   | dimethylallyl diphosphate metabolic process                                     | ENSACAG00000003142                                                                  |
| GO:0034470 | 0.008248377 | 9  | 312 | ncRNA processing                                                                | UTP20,ABT1,ELAC2,TYW5,MDN1,T<br>RMT61B,WDR3,THUMPD3,SART1                           |
| GO:0015805 | 0.009077769 | 1  | 1   | S-adenosyl-L-methionine transport                                               | SLC25A26                                                                            |
| GO:0034462 | 0.009347284 | 1  | 1   | small-subunit processome assembly                                               | ABT1                                                                                |
| GO:0000963 | 0.009503202 | 2  | 11  | mitochondrial RNA processing                                                    | ELAC2,TRMT61B                                                                       |
| GO:0071361 | 0.009707782 | 2  | 12  | cellular response to ethanol                                                    | PRKAA1,ENSACAG00000022125                                                           |
| GO:0006396 | 0.011096461 | 12 | 474 | RNA processing                                                                  | NSRP1,UTP20,PTBP3,ABT1,ELAC2,L<br>UC7L3,SNRPB2,TRMT61B,RBMX2,S<br>ART1,THOC5,SFSWAP |
| GO:0010257 | 0.011122383 | 2  | 17  | NADH dehydrogenase complex assembly                                             | COA1,NDUFAF4                                                                        |
| GO:0032981 | 0.011122383 | 2  | 17  | mitochondrial respiratory chain complex I assembly                              | COA1,NDUFAF4                                                                        |
| GO:0097031 | 0.011122383 | 2  | 17  | mitochondrial respiratory chain complex I biogenesis                            | COA1,NDUFAF4                                                                        |
| GO:0090673 | 0.011428505 | 1  | 1   | endothelial cell-matrix adhesion                                                | PECAM1                                                                              |
| GO:0006657 | 0.011490944 | 1  | 1   | CDP-choline pathway                                                             | PCYT1A                                                                              |
| GO:0070507 | 0.011696409 | 5  | 119 | regulation of microtubule cytoskeleton organization                             | FKBP4,HSPH1,KATNB1,ANKRD53,S<br>TIL                                                 |
| GO:0051186 | 0.011930253 | 7  | 226 | cofactor metabolic process                                                      | PAH,COX15,COQ2,COASY,IDH3G,M<br>AT2B,ENSACAG00000022125                             |
| GO:0090274 | 0.012606337 | 1  | 1   | positive regulation of somatostatin secretion                                   | CCKAR                                                                               |
| GO:0009073 | 0.012877382 | 1  | 1   | aromatic amino acid family biosynthetic process                                 | PAH                                                                                 |
| GO:1904146 | 0.013595778 | 1  | 1   | positive regulation of meiotic cell cycle process involved in oocyte maturation | CDC20                                                                               |
| GO:0000481 | 0.013731283 | 1  | 1   | maturation of 5S rRNA                                                           | SART1                                                                               |
| GO:0007229 | 0.013800909 | 4  | 71  | integrin-mediated signaling pathway                                             | MYH9,SYK,ENSACAG00000006445,<br>COL3A1                                              |
| GO:0006789 | 0.013820565 | 1  | 1   | bilirubin conjugation                                                           | ENSACAG00000022125                                                                  |
| GO:0070980 | 0.013820565 | 1  | 1   | biphenyl catabolic process                                                      | ENSACAG00000022125                                                                  |

|            |             |    |     |                                                                                                 |                                                                    |
|------------|-------------|----|-----|-------------------------------------------------------------------------------------------------|--------------------------------------------------------------------|
| GO:0034970 | 0.013846167 | 1  | 1   | histone H3-R2 methylation                                                                       | CARM1                                                              |
| GO:0015920 | 0.01390383  | 1  | 1   | lipopolysaccharide transport                                                                    | SCARB1                                                             |
| GO:0060696 | 0.01390383  | 1  | 1   | regulation of phospholipid catabolic process                                                    | SCARB1                                                             |
| GO:0009631 | 0.013988724 | 1  | 1   | cold acclimation                                                                                | PRKAA1                                                             |
| GO:0046318 | 0.013988724 | 1  | 1   | negative regulation of glucosylceramide biosynthetic process                                    | PRKAA1                                                             |
| GO:0061762 | 0.013988724 | 1  | 1   | CAMKK-AMPK signaling cascade                                                                    | PRKAA1                                                             |
| GO:0034660 | 0.014396715 | 10 | 391 | ncRNA metabolic process                                                                         | UTP20,ABT1,ELAC2,TYW5,MDN1,T<br>RMT61B,WDR3,THUMPD3,SART1,Y<br>ARS |
| GO:0001820 | 0.014434996 | 1  | 1   | serotonin secretion                                                                             | SYK                                                                |
| GO:0071226 | 0.014434996 | 1  | 1   | cellular response to molecule of fungal origin                                                  | SYK                                                                |
| GO:0046883 | 0.014580772 | 6  | 179 | regulation of hormone secretion                                                                 | FGG,ANXA1,ENSACAG00000015535,<br>STX4,RAB11FIP1,CCKAR              |
| GO:0044128 | 0.014641615 | 1  | 1   | positive regulation of growth of symbiont in host                                               | OSBP                                                               |
| GO:0034148 | 0.014645235 | 1  | 1   | negative regulation of toll-like receptor 5 signaling pathway                                   | TNFAIP3                                                            |
| GO:0070429 | 0.014645235 | 1  | 1   | negative regulation of nucleotide-binding oligomerization domain containing 1 signaling pathway | TNFAIP3                                                            |
| GO:2000349 | 0.014645235 | 1  | 1   | negative regulation of CD40 signaling pathway                                                   | TNFAIP3                                                            |
| GO:0034414 | 0.014645235 | 1  | 1   | tRNA 3'-trailer cleavage, endonucleolytic                                                       | ELAC2                                                              |
| GO:0051595 | 0.014645303 | 1  | 1   | response to methylglyoxal                                                                       | SIN3A                                                              |
| GO:1901675 | 0.014645303 | 1  | 1   | negative regulation of histone H3-K27 acetylation                                               | SIN3A                                                              |
| GO:1903923 | 0.014771808 | 1  | 1   | positive regulation of protein processing in phagocytic vesicle                                 | MYH9                                                               |
| GO:0045736 | 0.015567547 | 2  | 17  | negative regulation of cyclin-dependent protein serine/threonine kinase activity                | TNFAIP3,MEN1                                                       |
| GO:1901617 | 0.015774183 | 5  | 121 | organic hydroxy compound biosynthetic process                                                   | PRKAA1,CYP27A1,TMLHE,PCYT1A,<br>ENSACAG00000003142                 |
| GO:0070301 | 0.016693463 | 3  | 47  | cellular response to hydrogen peroxide                                                          | PRKAA1,SYK,TNFAIP3                                                 |
| GO:0042168 | 0.016783326 | 2  | 20  | heme metabolic process                                                                          | COX15,ENSACAG00000022125                                           |
| GO:0033119 | 0.016794658 | 2  | 19  | negative regulation of RNA splicing                                                             | PTBP3,SFSWAP                                                       |
| GO:0001570 | 0.017320435 | 3  | 45  | vasculogenesis                                                                                  | EGFL7,ENSACAG00000009367,MYO<br>1E                                 |

|            |             |   |     |                                                                           |                                                                      |
|------------|-------------|---|-----|---------------------------------------------------------------------------|----------------------------------------------------------------------|
| GO:0051977 | 0.018480184 | 1 | 2   | lysophospholipid transport                                                | MFSD2A                                                               |
| GO:0008360 | 0.018975759 | 5 | 130 | regulation of cell shape                                                  | FGD4,MYH9,ANXA1,SYNE3,RHOU                                           |
| GO:0031590 | 0.019217836 | 1 | 2   | wybutosine metabolic process                                              | TYW5                                                                 |
| GO:0031591 | 0.019217836 | 1 | 2   | wybutosine biosynthetic process                                           | TYW5                                                                 |
| GO:0006109 | 0.019304091 | 5 | 137 | regulation of carbohydrate metabolic process                              | ENSACAG00000002091,PRKAA1,ENSACAG00000022125,CLK2,ENSACAG00000009367 |
| GO:0003347 | 0.020289082 | 1 | 2   | epicardial cell to mesenchymal cell transition                            | FGFR1                                                                |
| GO:0034384 | 0.020426983 | 1 | 2   | high-density lipoprotein particle clearance                               | SCARB1                                                               |
| GO:0051090 | 0.0205726   | 8 | 303 | regulation of sequence-specific DNA binding transcription factor activity | CDK5RAP3,STK36,TNFAIP3,SAV1,MAPK8,MEN1,UFL1,ENSACAG00000003867       |
| GO:0005996 | 0.020614289 | 5 | 131 | monosaccharide metabolic process                                          | PRKAA1,ENSACAG00000022125,ENSACAG00000003913,PGM2L1,BRAT1            |
| GO:2001274 | 0.02111832  | 1 | 2   | negative regulation of glucose import in response to insulin stimulus     | PRKAA1                                                               |
| GO:1904426 | 0.021325811 | 1 | 2   | positive regulation of GTP binding                                        | CLN5                                                                 |
| GO:1903919 | 0.021594506 | 1 | 2   | negative regulation of actin filament severing                            | MYH9                                                                 |
| GO:0023035 | 0.021650079 | 1 | 2   | CD40 signaling pathway                                                    | ENSACAG00000003867                                                   |
| GO:1901659 | 0.021714149 | 4 | 112 | glycosyl compound biosynthetic process                                    | COASY,MAT2B,TYW5,UPP2                                                |
| GO:2000352 | 0.021968276 | 2 | 18  | negative regulation of endothelial cell apoptotic process                 | FGG,TNFAIP3                                                          |
| GO:0061098 | 0.022668765 | 2 | 20  | positive regulation of protein tyrosine kinase activity                   | SRCIN1,HSPH1                                                         |
| GO:0061614 | 0.022741902 | 1 | 2   | pri-miRNA transcription from RNA polymerase II promoter                   | ENSACAG00000009269                                                   |
| GO:0010992 | 0.022790278 | 1 | 2   | ubiquitin homeostasis                                                     | ENSACAG00000006462                                                   |
| GO:1901143 | 0.022790278 | 1 | 2   | insulin catabolic process                                                 | ENSACAG00000006462                                                   |
| GO:0030048 | 0.023053277 | 3 | 44  | actin filament-based movement                                             | MYH9,MYO1A,MYO1E                                                     |
| GO:0072537 | 0.023231153 | 1 | 3   | fibroblast activation                                                     | IL17RA                                                               |
| GO:0051182 | 0.023247194 | 1 | 2   | coenzyme transport                                                        | SLC25A26                                                             |
| GO:1904224 | 0.023247848 | 1 | 2   | negative regulation of glucuronosyltransferase activity                   | ENSACAG00000022125                                                   |
| GO:0044283 | 0.023252909 | 8 | 301 | small molecule biosynthetic process                                       | PAH,COQ2,MCAT,PRKAA1,CYP27A1,TMLHE,PCYT1A,ENSACAG000000              |

|            |             |    |     |                                                                                    |                                                                                                |
|------------|-------------|----|-----|------------------------------------------------------------------------------------|------------------------------------------------------------------------------------------------|
| GO:1903747 | 0.023297454 | 2  | 23  | regulation of establishment of protein localization to mitochondrion               | 03142<br>HSPH1,MAPK8                                                                           |
| GO:0006913 | 0.0234963   | 6  | 185 | nucleocytoplasmic transport                                                        | NSRP1,ENSACAG00000002091,NUP85,RBMX2,THOC5,NUP107                                              |
| GO:0070271 | 0.024314193 | 2  | 31  | protein complex biogenesis                                                         | COA1,NDUFAF4                                                                                   |
| GO:1903047 | 0.02446241  | 11 | 458 | mitotic cell cycle process                                                         | KDM8,NEDD1,CDK5RAP3,CARM1,ENSACAG00000013691,RHOU,ENSACAG00000004206,ANKRD53,STIL,RAD21,NUP107 |
| GO:0031532 | 0.024767458 | 3  | 53  | actin cytoskeleton reorganization                                                  | MYH9,ANXA1,CCKAR                                                                               |
| GO:0050878 | 0.024780128 | 6  | 184 | regulation of body fluid levels                                                    | SERPINC1,SERPIND1,F5,FGG,ENSACAG00000009367,CCKAR                                              |
| GO:0051169 | 0.025065614 | 6  | 188 | nuclear transport                                                                  | NSRP1,ENSACAG00000002091,NUP85,RBMX2,THOC5,NUP107                                              |
| GO:0050817 | 0.025161819 | 4  | 91  | coagulation                                                                        | SERPINC1,SERPIND1,F5,FGG                                                                       |
| GO:0006624 | 0.025317409 | 1  | 3   | vacuolar protein processing                                                        | TMEM208                                                                                        |
| GO:0043433 | 0.025898153 | 4  | 102 | negative regulation of sequence-specific DNA binding transcription factor activity | CDK5RAP3,TNFAIP3,MEN1,UFL1                                                                     |
| GO:0050904 | 0.025907141 | 1  | 2   | diapedesis                                                                         | PECAM1                                                                                         |
| GO:0006261 | 0.02667879  | 2  | 21  | DNA-dependent DNA replication                                                      | BAZ1A,POLD2                                                                                    |
| GO:0007258 | 0.026998463 | 1  | 2   | JUN phosphorylation                                                                | MAPK8                                                                                          |
| GO:0006437 | 0.027041484 | 1  | 2   | tyrosyl-tRNA aminoacylation                                                        | YARS                                                                                           |
| GO:0031667 | 0.02719755  | 7  | 254 | response to nutrient levels                                                        | SERPINC1,PRKAA1,MBD1,ENSACAG00000015535,ENSACAG00000022125,ENSACAG00000015364,CCKAR            |
| GO:1990379 | 0.027413822 | 1  | 2   | lipid transport across blood brain barrier                                         | MFSD2A                                                                                         |
| GO:0032886 | 0.027733503 | 5  | 144 | regulation of microtubule-based process                                            | FKBP4,HSPH1,KATNB1,ANKRD53,STIL                                                                |
| GO:0060982 | 0.02776097  | 1  | 2   | coronary artery morphogenesis                                                      | ENSACAG00000009269                                                                             |
| GO:0030578 | 0.02776097  | 1  | 2   | PML body organization                                                              | ENSACAG00000009269                                                                             |
| GO:0032796 | 0.027826382 | 1  | 2   | uropod organization                                                                | MYH9                                                                                           |
| GO:0035461 | 0.028004565 | 1  | 2   | vitamin transmembrane transport                                                    | SCARB1                                                                                         |

|            |             |   |     |                                                                                  |                                                                                             |
|------------|-------------|---|-----|----------------------------------------------------------------------------------|---------------------------------------------------------------------------------------------|
| GO:1902415 | 0.028022577 | 1 | 2   | regulation of mRNA binding                                                       | CARM1                                                                                       |
| GO:0051552 | 0.028264094 | 1 | 2   | flavone metabolic process                                                        | ENSACAG00000022125                                                                          |
| GO:0006720 | 0.028490109 | 4 | 103 | isoprenoid metabolic process                                                     | HSPG2,COQ2,ENSACAG00000022125<br>,ENSACAG00000003142                                        |
| GO:0030262 | 0.028806097 | 1 | 3   | apoptotic nuclear changes                                                        | CDK5RAP3                                                                                    |
| GO:0001922 | 0.029076977 | 1 | 2   | B-1 B cell homeostasis                                                           | TNFAIP3                                                                                     |
| GO:0070212 | 0.029077034 | 1 | 2   | protein poly-ADP-ribosylation                                                    | PARP1                                                                                       |
| GO:0045124 | 0.029452854 | 2 | 26  | regulation of bone resorption                                                    | SYK,TNFAIP3                                                                                 |
| GO:1902823 | 0.029673252 | 1 | 2   | negative regulation of late endosome to lysosome transport                       | VPS35                                                                                       |
| GO:0002023 | 0.030030206 | 1 | 4   | reduction of food intake in response to dietary excess                           | CCKAR                                                                                       |
| GO:0060349 | 0.030060928 | 2 | 24  | bone morphogenesis                                                               | CARM1,ENSACAG00000009367                                                                    |
| GO:0043484 | 0.030112525 | 4 | 100 | regulation of RNA splicing                                                       | NSRP1,PTBP3,CLK2,SFSWAP                                                                     |
| GO:1900127 | 0.030154565 | 1 | 3   | positive regulation of hyaluronan biosynthetic process                           | ENSACAG00000009367                                                                          |
| GO:0045668 | 0.032476438 | 2 | 30  | negative regulation of osteoblast differentiation                                | UCMA,MEN1                                                                                   |
| GO:0010803 | 0.032720108 | 2 | 24  | regulation of tumor necrosis factor-mediated signaling pathway                   | TNFAIP3,ENSACAG00000003867                                                                  |
| GO:0033108 | 0.032975462 | 2 | 36  | mitochondrial respiratory chain complex assembly                                 | COA1,NDUFAF4<br>ENSACAG00000002091,SYK,NUP85,<br>SLC25A26,RBMX2,THOC5,RHCG,N<br>UP107,CCKAR |
| GO:0071705 | 0.032976355 | 9 | 366 | nitrogen compound transport                                                      | CLUH,BRAT1                                                                                  |
| GO:0051646 | 0.033676392 | 2 | 22  | mitochondrion localization                                                       | ENSACAG00000002091,FKBP4,HSPH<br>1,ENSACAG00000017064,QSOX1                                 |
| GO:0006457 | 0.03440204  | 5 | 168 | protein folding                                                                  | IL17RA                                                                                      |
| GO:0032747 | 0.034417676 | 1 | 3   | positive regulation of interleukin-23 production                                 | NUP107                                                                                      |
| GO:0000973 | 0.035348384 | 1 | 3   | posttranscriptional tethering of RNA polymerase II gene DNA at nuclear periphery | TNFAIP3                                                                                     |
| GO:0090291 | 0.035813588 | 1 | 4   | negative regulation of osteoclast proliferation                                  | TNFAIP3                                                                                     |
| GO:0002676 | 0.035970778 | 1 | 4   | regulation of chronic inflammatory response                                      | MFSD2A,MTTP,SCARB1                                                                          |
| GO:0015748 | 0.036321305 | 3 | 64  | organophosphate ester transport                                                  | PARP1                                                                                       |
| GO:1990966 | 0.036593133 | 1 | 3   | ATP generation from poly-ADP-D-ribose                                            | PRKAA1,CYP27A1,MAT2B,ENSACA<br>G00000022125,SCARB1,ENSACAG00                                |
| GO:0008202 | 0.036692159 | 6 | 208 | steroid metabolic process                                                        |                                                                                             |



|            |             |   |     |                                                       |                                                                   |
|------------|-------------|---|-----|-------------------------------------------------------|-------------------------------------------------------------------|
| GO:0045329 | 0.037122081 | 1 | 3   | carnitine biosynthetic process                        | 000003142<br>TMLHE                                                |
| GO:0006412 | 0.037649301 | 5 | 228 | translation                                           | SLC25A1,COA1,SLC25A26,RPL35,ENSACAG00000004291                    |
| GO:0050807 | 0.037793226 | 4 | 100 | regulation of synapse organization                    | CDC20,CLSTN3,ENSACAG00000017843,EPHB3                             |
| GO:0051188 | 0.038116464 | 4 | 120 | cofactor biosynthetic process                         | COX15,COQ2,COASY,MAT2B                                            |
| GO:0030488 | 0.038283369 | 2 | 27  | tRNA methylation                                      | TRMT61B,THUMPD3                                                   |
| GO:0000022 | 0.038327088 | 1 | 3   | mitotic spindle elongation                            | ENSACAG00000004206                                                |
| GO:0032497 | 0.038455091 | 1 | 4   | detection of lipopolysaccharide                       | SCARB1                                                            |
| GO:0019740 | 0.038481458 | 1 | 3   | nitrogen utilization                                  | RHCG                                                              |
| GO:2000664 | 0.038995517 | 1 | 3   | positive regulation of interleukin-5 secretion        | IL17RA                                                            |
| GO:1901563 | 0.039004629 | 1 | 3   | response to camptothecin                              | PRKAA1                                                            |
| GO:0042167 | 0.039048728 | 1 | 4   | heme catabolic process                                | ENSACAG00000022125                                                |
| GO:0097034 | 0.039625032 | 1 | 9   | mitochondrial respiratory chain complex IV biogenesis | COA1                                                              |
| GO:1901137 | 0.04002151  | 8 | 354 | carbohydrate derivative biosynthetic process          | HSPG2,COASY,CANT1,MAT2B,TYW5,ALG3,ENSACAG00000009367,UPP2         |
| GO:0072573 | 0.04046207  | 1 | 3   | tolerance induction to lipopolysaccharide             | TNFAIP3                                                           |
| GO:0001767 | 0.04066379  | 1 | 3   | establishment of lymphocyte polarity                  | MYH9                                                              |
| GO:0008299 | 0.041036543 | 2 | 28  | isoprenoid biosynthetic process                       | COQ2,ENSACAG00000003142                                           |
| GO:2000002 | 0.041158521 | 1 | 3   | negative regulation of DNA damage checkpoint          | THOC5                                                             |
| GO:0060856 | 0.041202042 | 1 | 3   | establishment of blood-brain barrier                  | MFSD2A                                                            |
| GO:0061077 | 0.04128796  | 2 | 33  | chaperone-mediated protein folding                    | FKBP4,HSPH1                                                       |
| GO:0070508 | 0.041288947 | 1 | 4   | cholesterol import                                    | SCARB1                                                            |
| GO:0071396 | 0.041973069 | 6 | 220 | cellular response to lipid                            | PRKAA1,ANXA1,ENSACAG000000022125,TNFAIP3,ENSACAG00000015364,MAPK8 |
| GO:0051932 | 0.042059963 | 1 | 4   | synaptic transmission, GABAergic                      | CLSTN3                                                            |
| GO:0051295 | 0.042207296 | 1 | 3   | establishment of meiotic spindle localization         | MYH9                                                              |
| GO:0034502 | 0.042249406 | 2 | 27  | protein localization to chromosome                    | SLF2,RAD21                                                        |
| GO:0044206 | 0.0422531   | 1 | 7   | UMP salvage                                           | UPP2                                                              |

|            |             |    |     |                                                                                                              |                                                                                                                  |
|------------|-------------|----|-----|--------------------------------------------------------------------------------------------------------------|------------------------------------------------------------------------------------------------------------------|
| GO:0006105 | 0.042290465 | 1  | 3   | succinate metabolic process                                                                                  | SDHA                                                                                                             |
| GO:1990166 | 0.042601527 | 1  | 3   | protein localization to site of double-strand break                                                          | SLF2                                                                                                             |
| GO:0050994 | 0.042792508 | 2  | 27  | regulation of lipid catabolic process                                                                        | PRKAA1,SCARB1                                                                                                    |
| GO:0060215 | 0.042826095 | 1  | 4   | primitive hemopoiesis                                                                                        | THOC5                                                                                                            |
| GO:1902963 | 0.043058822 | 1  | 3   | negative regulation of metalloendopeptidase activity involved in amyloid precursor protein catabolic process | ENSACAG00000011799                                                                                               |
| GO:0000462 | 0.04328212  | 2  | 30  | maturation of SSU-rRNA from tricistronic rRNA transcript (SSU-rRNA, 5.8S rRNA, LSU-rRNA)                     | UTP20,WDR3                                                                                                       |
| GO:0071205 | 0.043298324 | 1  | 3   | protein localization to juxtaparanode region of axon                                                         | CNTN2                                                                                                            |
| GO:0046146 | 0.044190331 | 1  | 7   | tetrahydrobiopterin metabolic process                                                                        | PAH                                                                                                              |
| GO:0033504 | 0.044314849 | 1  | 4   | floor plate development                                                                                      | STIL                                                                                                             |
| GO:0071569 | 0.044869331 | 1  | 5   | protein ufmylation                                                                                           | UFL1                                                                                                             |
| GO:1990592 | 0.044869331 | 1  | 5   | protein K69-linked ufmylation                                                                                | UFL1                                                                                                             |
| GO:0032652 | 0.045099988 | 2  | 29  | regulation of interleukin-1 production                                                                       | ANXA1,TNFAIP3                                                                                                    |
| GO:0090500 | 0.045311583 | 1  | 4   | endocardial cushion to mesenchymal transition                                                                | ENSACAG00000009367                                                                                               |
| GO:0030157 | 0.045658452 | 1  | 5   | pancreatic juice secretion                                                                                   | CCKAR                                                                                                            |
| GO:0010815 | 0.046121825 | 1  | 4   | bradykinin catabolic process                                                                                 | ENSACAG00000006462                                                                                               |
| GO:0071495 | 0.046613392 | 10 | 471 | cellular response to endogenous stimulus                                                                     | PRKAA1,ANXA1,ENSACAG00000015535,ENSACAG000000022125,SIN3A,ENSACAG00000009367,ENSACAG0000015364,COL3A1,MEN1,CCKAR |
| GO:0071391 | 0.046755987 | 2  | 30  | cellular response to estrogen stimulus                                                                       | ENSACAG000000022125,ENSACAG0000015364                                                                            |
| GO:0018212 | 0.047274805 | 3  | 61  | peptidyl-tyrosine modification                                                                               | SYK,CLK2,FGFR1                                                                                                   |
| GO:0006556 | 0.047354467 | 1  | 4   | S-adenosylmethionine biosynthetic process                                                                    | MAT2B                                                                                                            |
| GO:0035493 | 0.047495302 | 1  | 7   | SNARE complex assembly                                                                                       | STX4                                                                                                             |
| GO:1903335 | 0.047499124 | 1  | 5   | regulation of vacuolar transport                                                                             | VPS35                                                                                                            |
| GO:0006301 | 0.047786063 | 2  | 31  | postreplication repair                                                                                       | NSMCE1,VCP                                                                                                       |
| GO:0002526 | 0.04793323  | 2  | 31  | acute inflammatory response                                                                                  | SERPINC1,ENSACAG000000022125                                                                                     |
| GO:0045786 | 0.048207617 | 8  | 386 | negative regulation of cell cycle                                                                            | CDK5RAP3,PRKAA1,CARM1,ENSACAG00000013691,TNFAIP3,SART1,T                                                         |

|            |             |   |     |                                                           |                               |
|------------|-------------|---|-----|-----------------------------------------------------------|-------------------------------|
| GO:0045824 | 0.048747732 | 2 | 29  | negative regulation of innate immune response             | HOC5,MEN1                     |
| GO:0043654 | 0.048793005 | 1 | 4   | recognition of apoptotic cell                             | TRAFD1,TNFAIP3                |
| GO:0030198 | 0.049342607 | 6 | 210 | extracellular matrix organization                         | SCARB1                        |
| GO:0006346 | 0.049431954 | 1 | 4   | methylation-dependent chromatin silencing                 | HSPG2,FGG,ENSACAG00000006445, |
| GO:0048008 | 0.049589015 | 2 | 29  | platelet-derived growth factor receptor signaling pathway | ENSACAG00000009367,MYO1E,COL  |
| GO:0061469 | 0.049655856 | 1 | 5   | regulation of type B pancreatic cell proliferation        | 3A1                           |
|            |             |   |     |                                                           | MBD1                          |
|            |             |   |     |                                                           | PDGFC,MYO1E                   |
|            |             |   |     |                                                           | MEN1                          |

**Table S6. PSGs identified on branch 7 of lizard.**

| <b>Ensembl Prot ID</b> | <b>Ensembl Gene ID</b> | <b>Ensembl Trans ID</b> | <b>HNGC Name</b> |
|------------------------|------------------------|-------------------------|------------------|
| ENSACAP00000008616     | ENSACAG00000008793     | ENSACAT00000008799      |                  |
| ENSACAP00000001892     | ENSACAG00000001928     | ENSACAT00000001938      | PPIA             |
| ENSACAP00000009102     | ENSACAG00000009174     | ENSACAT00000009295      | TOP3A            |
| ENSACAP000000011752    | ENSACAG000000011849    | ENSACAT000000011995     |                  |
| ENSACAP00000008334     | ENSACAG00000008479     | ENSACAT00000008515      | EPN2             |
| ENSACAP00000009466     | ENSACAG00000009326     | ENSACAT00000009663      | HKDC1            |
| ENSACAP000000016791    | ENSACAG000000017044    | ENSACAT000000017122     | SPG7             |
| ENSACAP00000000589     | ENSACAG00000000612     | ENSACAT00000000608      | EIF4H            |
| ENSACAP00000003351     | ENSACAG00000003450     | ENSACAT00000003434      | FDPS             |
| ENSACAP000000016287    | ENSACAG000000016561    | ENSACAT000000016611     | CCDC120          |
| ENSACAP000000017141    | ENSACAG000000017411    | ENSACAT000000017478     | CCDC155          |
| ENSACAP00000004380     | ENSACAG00000004514     | ENSACAT00000004480      | MTFMT            |
| ENSACAP00000007881     | ENSACAG00000008005     | ENSACAT00000008047      | PHACTR2          |
| ENSACAP000000019723    | ENSACAG000000026198    | ENSACAT000000027755     |                  |
| ENSACAP000000019544    | ENSACAG000000025211    | ENSACAT000000023876     | PSMB7            |
| ENSACAP000000012215    | ENSACAG000000012469    | ENSACAT000000012465     | ALG8             |
| ENSACAP000000003421    | ENSACAG000000003518    | ENSACAT000000003505     | SNX15            |

|                    |                    |                    |          |
|--------------------|--------------------|--------------------|----------|
| ENSACAP0000002218  | ENSACAG0000002161  | ENSACAT0000002278  | GGCX     |
| ENSACAP00000012225 | ENSACAG00000012412 | ENSACAT00000012475 | TINAGL1  |
| ENSACAP00000013010 | ENSACAG00000013244 | ENSACAT00000013269 | AIMP2    |
| ENSACAP00000021150 | ENSACAG00000025684 | ENSACAT00000023023 | CDK5R1   |
| ENSACAP00000009014 | ENSACAG00000009215 | ENSACAT00000009207 | MAP7D3   |
| ENSACAP00000014902 | ENSACAG00000015167 | ENSACAT00000015205 | CA4      |
| ENSACAP00000007360 | ENSACAG00000007471 | ENSACAT00000007516 | TMPRSS13 |
| ENSACAP00000021911 | ENSACAG00000028360 | ENSACAT00000029329 | LRRIQ3   |
| ENSACAP00000005537 | ENSACAG00000005675 | ENSACAT00000005658 | SPATA6   |
| ENSACAP00000005172 | ENSACAG00000005300 | ENSACAT00000005289 | PENK     |
| ENSACAP00000009494 | ENSACAG00000009686 | ENSACAT00000009691 | WDYHV1   |
| ENSACAP00000004033 | ENSACAG00000003913 | ENSACAT00000004125 |          |
| ENSACAP00000006642 | ENSACAG00000006706 | ENSACAT00000006788 | PAFAH1B1 |
| ENSACAP00000015047 | ENSACAG00000015242 | ENSACAT00000015351 | MYO1E    |
| ENSACAP00000009822 | ENSACAG00000009903 | ENSACAT00000010022 |          |
| ENSACAP00000010243 | ENSACAG00000010426 | ENSACAT00000010453 | WDR18    |
| ENSACAP00000003556 | ENSACAG00000003644 | ENSACAT00000003644 | NMI      |
| ENSACAP00000006831 | ENSACAG00000006971 | ENSACAT00000006981 | CASP2    |
| ENSACAP00000012450 | ENSACAG00000012696 | ENSACAT00000012706 |          |
| ENSACAP00000016586 | ENSACAG00000016861 | ENSACAT00000016912 | RNF4     |
| ENSACAP00000014398 | ENSACAG00000014647 | ENSACAT00000014692 | HDAC8    |
| ENSACAP00000006372 | ENSACAG00000006516 | ENSACAT00000006515 | SLC38A6  |
| ENSACAP00000000186 | ENSACAG00000000189 | ENSACAT00000000189 | RPUSD4   |
| ENSACAP00000001731 | ENSACAG00000001829 | ENSACAT00000001771 | CPLX1    |
| ENSACAP00000009857 | ENSACAG00000010053 | ENSACAT00000010060 | DCLRE1A  |
| ENSACAP00000013467 | ENSACAG00000013657 | ENSACAT00000013745 | RMDN3    |
| ENSACAP00000007911 | ENSACAG00000007985 | ENSACAT00000008077 | POLR3A   |
| ENSACAP00000008939 | ENSACAG00000009078 | ENSACAT00000009130 |          |
| ENSACAP00000014119 | ENSACAG00000014302 | ENSACAT00000014409 | LONP2    |
| ENSACAP00000009111 | ENSACAG00000009325 | ENSACAT00000009304 | PSMD5    |

|                    |                    |                    |          |
|--------------------|--------------------|--------------------|----------|
| ENSACAP00000003529 | ENSACAG00000003604 | ENSACAT00000003617 | RANBP9   |
| ENSACAP00000003912 | ENSACAG00000003975 | ENSACAT00000004004 | FAM179B  |
| ENSACAP00000006807 | ENSACAG00000006885 | ENSACAT00000006957 |          |
| ENSACAP00000007188 | ENSACAG00000007331 | ENSACAT00000007343 | TRUB2    |
| ENSACAP00000005006 | ENSACAG00000005072 | ENSACAT00000005119 | TRDMT1   |
| ENSACAP00000005435 | ENSACAG00000005541 | ENSACAT00000005553 | DCP1B    |
| ENSACAP00000008622 | ENSACAG00000008770 | ENSACAT00000008805 | UQCRC2   |
| ENSACAP00000014797 | ENSACAG00000015073 | ENSACAT00000015098 | CD79A    |
| ENSACAP00000016065 | ENSACAG00000016357 | ENSACAT00000016385 | CCDC114  |
| ENSACAP00000012512 | ENSACAG00000011927 | ENSACAT00000012768 |          |
| ENSACAP00000016197 | ENSACAG00000016429 | ENSACAT00000016520 | ECT2     |
| ENSACAP00000012123 | ENSACAG00000012336 | ENSACAT00000012368 | NPHS2    |
| ENSACAP00000016631 | ENSACAG00000016906 | ENSACAT00000016958 | LENG9    |
| ENSACAP00000001278 | ENSACAG00000001224 | ENSACAT00000001311 | PPIL2    |
| ENSACAP00000020077 | ENSACAG00000017616 | ENSACAT00000023898 | ZBBX     |
| ENSACAP00000012505 | ENSACAG00000012646 | ENSACAT00000012761 | BZW2     |
| ENSACAP00000006658 | ENSACAG00000006806 | ENSACAT00000006804 | RSRC1    |
| ENSACAP00000011017 | ENSACAG00000011260 | ENSACAT00000011245 | RAP2B    |
| ENSACAP00000007488 | ENSACAG00000007569 | ENSACAT00000007645 | RNF13    |
| ENSACAP00000002874 | ENSACAG00000002984 | ENSACAT00000002945 |          |
| ENSACAP00000009037 | ENSACAG00000009195 | ENSACAT00000009230 | TGFBR1   |
| ENSACAP00000012778 | ENSACAG00000013023 | ENSACAT00000013034 | CENPC    |
| ENSACAP00000006276 | ENSACAG00000006300 | ENSACAT00000006416 | GIGYF2   |
| ENSACAP00000013601 | ENSACAG00000013672 | ENSACAT00000013881 | LTA4H    |
| ENSACAP00000017175 | ENSACAG00000017448 | ENSACAT00000017512 | C10orf88 |
| ENSACAP00000000334 | ENSACAG00000000380 | ENSACAT00000000348 | OLFM4    |
| ENSACAP00000016295 | ENSACAG00000016570 | ENSACAT00000016619 | ETV7     |
| ENSACAP00000000533 | ENSACAG00000000625 | ENSACAT00000000552 | BORA     |
| ENSACAP00000007022 | ENSACAG00000007100 | ENSACAT00000007173 | ZNF277   |
| ENSACAP00000012075 | ENSACAG00000012308 | ENSACAT00000012320 | EMC10    |

|                    |                    |                    |         |
|--------------------|--------------------|--------------------|---------|
| ENSACAP00000012243 | ENSACAG00000012446 | ENSACAT00000012494 | ARNTL2  |
| ENSACAP00000015866 | ENSACAG00000016035 | ENSACAT00000016184 | GNAI1   |
| ENSACAP00000006098 | ENSACAG00000006177 | ENSACAT00000006235 | PHTF2   |
| ENSACAP00000000756 | ENSACAG00000000644 | ENSACAT00000000780 | PROS1   |
| ENSACAP00000010876 | ENSACAG00000011065 | ENSACAT00000011102 | CMSS1   |
| ENSACAP00000014735 | ENSACAG00000014951 | ENSACAT00000015036 | DDX4    |
| ENSACAP00000002495 | ENSACAG00000002612 | ENSACAT00000002560 | CTXN3   |
| ENSACAP00000004504 | ENSACAG00000004592 | ENSACAT00000004607 |         |
| ENSACAP00000010618 | ENSACAG00000010781 | ENSACAT00000010837 | HAUS6   |
| ENSACAP00000014848 | ENSACAG00000015126 | ENSACAT00000015149 |         |
| ENSACAP00000017384 | ENSACAG00000017648 | ENSACAT00000017725 | EXOSC8  |
| ENSACAP00000016946 | ENSACAG00000017202 | ENSACAT00000017281 | ATF1    |
| ENSACAP00000000600 | ENSACAG00000000510 | ENSACAT00000000620 |         |
| ENSACAP00000007748 | ENSACAG00000007876 | ENSACAT00000007914 | MYL6    |
| ENSACAP00000016415 | ENSACAG00000016662 | ENSACAT00000016740 | PGS1    |
| ENSACAP00000010337 | ENSACAG00000010381 | ENSACAT00000010550 | KALRN   |
| ENSACAP00000003778 | ENSACAG00000003893 | ENSACAT00000003870 | TMEM177 |
| ENSACAP00000000432 | ENSACAG00000000451 | ENSACAT00000000449 | HNMT    |
| ENSACAP00000015661 | ENSACAG00000015930 | ENSACAT00000015976 | LCP2    |
| ENSACAP00000016181 | ENSACAG00000016379 | ENSACAT00000016502 | RUFY1   |
| ENSACAP00000016478 | ENSACAG00000016751 | ENSACAT00000016804 | THSD1   |
| ENSACAP00000014275 | ENSACAG00000014566 | ENSACAT00000014568 | LIG4    |
| ENSACAP00000001570 | ENSACAG00000001672 | ENSACAT00000001607 | TRDN    |
| ENSACAP00000012699 | ENSACAG00000012645 | ENSACAT00000012955 | QARS    |
| ENSACAP00000000946 | ENSACAG00000000985 | ENSACAT00000000974 | CTGF    |
| ENSACAP00000007136 | ENSACAG00000007254 | ENSACAT00000007291 |         |
| ENSACAP00000004112 | ENSACAG00000004244 | ENSACAT00000004209 | MRPL18  |
| ENSACAP00000008317 | ENSACAG00000008467 | ENSACAT00000008497 | FRMD1   |

---

**Table S7. GO terms associated with PSGs identified on lizard branch 7.**

| category   | pvalue      | numDE<br>InCat | numIn<br>Cat | term                                                                                      | GeneNames                                                     |
|------------|-------------|----------------|--------------|-------------------------------------------------------------------------------------------|---------------------------------------------------------------|
| GO:0070507 | 4.61E-06    | 7              | 119          | regulation of microtubule cytoskeleton organization                                       | ECT2,BORA,CDK5R1,PAFAH1B1,ENS<br>ACAG00000012696,RNF4,FAM179B |
| GO:0032886 | 1.86E-05    | 7              | 144          | regulation of microtubule-based process                                                   | ECT2,BORA,CDK5R1,PAFAH1B1,ENS<br>ACAG00000012696,RNF4,FAM179B |
| GO:0061001 | 0.000728444 | 3              | 27           | regulation of dendritic spine morphogenesis                                               | KALRN,CDK5R1,PAFAH1B1                                         |
| GO:0006625 | 0.001270913 | 2              | 10           | protein targeting to peroxisome                                                           | ENSACAG00000011849,LONP2                                      |
| GO:0043574 | 0.001270913 | 2              | 10           | peroxisomal transport                                                                     | ENSACAG00000011849,LONP2                                      |
| GO:0021819 | 0.001333661 | 2              | 10           | layer formation in cerebral cortex                                                        | CDK5R1,PAFAH1B1                                               |
| GO:0000413 | 0.002762017 | 2              | 16           | protein peptidyl-prolyl isomerization                                                     | PPIL2,PIIA                                                    |
| GO:0070925 | 0.003044368 | 6              | 246          | organelle assembly                                                                        | CENPC,HAUS6,CCDC155,SPATA6,PA<br>FAH1B1,ENSACAG00000012696    |
| GO:0006399 | 0.003280201 | 5              | 176          | tRNA metabolic process                                                                    | EXOSC8,QARS,RPUSD4,TRUB2,TRD<br>MT1                           |
| GO:0072015 | 0.003555081 | 2              | 14           | glomerular visceral epithelial cell development                                           | NPHS2,MYO1E                                                   |
| GO:0000291 | 0.003849114 | 2              | 18           | nuclear-transcribed mRNA catabolic process, exonucleolytic                                | EXOSC8,DCP1B                                                  |
| GO:0001522 | 0.004026245 | 2              | 18           | pseudouridine synthesis                                                                   | RPUSD4,TRUB2                                                  |
| GO:0071897 | 0.00451704  | 3              | 56           | DNA biosynthetic process                                                                  | TOP3A,LIG4,CTGF                                               |
| GO:0051867 | 0.004696361 | 1              | 1            | general adaptation syndrome, behavioral process                                           | PENK                                                          |
| GO:0032687 | 0.004873366 | 1              | 1            | negative regulation of interferon-alpha production                                        | NMI                                                           |
| GO:0009306 | 0.005107436 | 4              | 120          | protein secretion                                                                         | ENSACAG00000011849,LCP2,PAFAH1<br>B1,CPLX1                    |
| GO:0090220 | 0.005309215 | 1              | 1            | chromosome localization to nuclear envelope involved in homologous chromosome segregation | CCDC155                                                       |
| GO:0051276 | 0.005372572 | 6              | 271          | chromosome organization                                                                   | CENPC,TOP3A,CCDC155,PAFAH1B1,<br>HDAC8,DCLRE1A                |
| GO:0001695 | 0.005416762 | 1              | 1            | histamine catabolic process                                                               | HNMT                                                          |
| GO:0090176 | 0.005948274 | 1              | 1            | microtubule cytoskeleton organization involved in establishment of planar polarity        | PAFAH1B1                                                      |
| GO:0002209 | 0.006236284 | 2              | 23           | behavioral defense response                                                               | KALRN,PENK                                                    |

|            |             |   |     |                                                                                     |                                            |
|------------|-------------|---|-----|-------------------------------------------------------------------------------------|--------------------------------------------|
| GO:0034660 | 0.006342    | 7 | 391 | ncRNA metabolic process                                                             | DDX4,EXOSC8,QARS,WDR18,RPUSD4,TRUB2,TRDMT1 |
| GO:0051461 | 0.006645157 | 1 | 2   | positive regulation of corticotropin secretion                                      | ENSACAG00000011849                         |
| GO:0007031 | 0.006812234 | 2 | 22  | peroxisome organization                                                             | ENSACAG00000011849,LONP2                   |
| GO:0006425 | 0.006866147 | 1 | 1   | glutaminyl-tRNA aminoacylation                                                      | QARS                                       |
| GO:0090158 | 0.007606271 | 1 | 2   | endoplasmic reticulum membrane organization                                         | TRDN                                       |
| GO:0021722 | 0.007701049 | 1 | 2   | superior olivary nucleus maturation                                                 | CDK5R1                                     |
| GO:0050905 | 0.008899274 | 3 | 72  | neuromuscular process                                                               | GIGYF2,PENK,PAFAH1B1                       |
| GO:0014075 | 0.009175654 | 2 | 24  | response to amine                                                                   | HNMT,TRDMT1                                |
| GO:0007062 | 0.010457074 | 3 | 76  | sister chromatid cohesion                                                           | CENPC,PAFAH1B1,HDAC8                       |
| GO:1903321 | 0.010459358 | 3 | 83  | negative regulation of protein modification by small protein conjugation or removal | RNF4,HDAC8,PSMD5                           |
| GO:0008088 | 0.010855916 | 2 | 31  | axo-dendritic transport                                                             | SPG7,PAFAH1B1                              |
| GO:1902524 | 0.011003462 | 1 | 2   | positive regulation of protein K48-linked ubiquitination                            | NMI                                        |
| GO:0065002 | 0.011276057 | 2 | 34  | intracellular protein transmembrane transport                                       | ENSACAG00000011849,LONP2                   |
| GO:0000086 | 0.011580468 | 3 | 77  | G2/M transition of mitotic cell cycle                                               | BORA,HAUS6,PAFAH1B1                        |
| GO:0033383 | 0.011866226 | 1 | 2   | geranyl diphosphate metabolic process                                               | FDPS                                       |
| GO:0033384 | 0.011866226 | 1 | 2   | geranyl diphosphate biosynthetic process                                            | FDPS                                       |
| GO:0045337 | 0.011866226 | 1 | 2   | farnesyl diphosphate biosynthetic process                                           | FDPS                                       |
| GO:0045338 | 0.011866226 | 1 | 2   | farnesyl diphosphate metabolic process                                              | FDPS                                       |
| GO:0046469 | 0.012513946 | 1 | 2   | platelet activating factor metabolic process                                        | PAFAH1B1                                   |
| GO:0006490 | 0.012987417 | 1 | 2   | oligosaccharide-lipid intermediate biosynthetic process                             | ALG8                                       |
| GO:0051691 | 0.012987417 | 1 | 2   | cellular oligosaccharide metabolic process                                          | ALG8                                       |
| GO:1903697 | 0.013082687 | 1 | 2   | negative regulation of microvillus assembly                                         | ENSACAG00000006885                         |
| GO:0070682 | 0.014372943 | 1 | 3   | proteasome regulatory particle assembly                                             | PSMD5                                      |
| GO:0051301 | 0.01529286  | 6 | 351 | cell division                                                                       | CENPC,BORA,GNAI1,HAUS6,LIG4,PAFAH1B1       |
| GO:0097010 | 0.015380222 | 1 | 3   | eukaryotic translation initiation factor 4F complex assembly                        | EIF4H                                      |
| GO:0035928 | 0.015603117 | 1 | 3   | rRNA import into mitochondrion                                                      | MRPL18                                     |
| GO:0001692 | 0.016587775 | 1 | 3   | histamine metabolic process                                                         | HNMT                                       |



|            |             |   |     |                                                                            |                         |
|------------|-------------|---|-----|----------------------------------------------------------------------------|-------------------------|
| GO:0050851 | 0.016857331 | 3 | 102 | antigen receptor-mediated signaling pathway                                | CD79A,LCP2,PSMD5        |
| GO:0010927 | 0.016877385 | 3 | 89  | cellular component assembly involved in morphogenesis                      | SPATA6,PAFAH1B1,FAM179B |
| GO:0017187 | 0.017049735 | 1 | 3   | peptidyl-glutamic acid carboxylation                                       | GGCX                    |
| GO:0090234 | 0.017528696 | 1 | 3   | regulation of kinetochore assembly                                         | RNF4                    |
| GO:0034473 | 0.01770932  | 1 | 4   | U1 snRNA 3'-end processing                                                 | EXOSC8                  |
| GO:0043622 | 0.017733468 | 1 | 3   | cortical microtubule organization                                          | PAFAH1B1                |
| GO:0051653 | 0.018075475 | 1 | 3   | spindle localization                                                       | CCDC155                 |
| GO:0035927 | 0.018858089 | 1 | 4   | RNA import into mitochondrion                                              | MRPL18                  |
| GO:0051280 | 0.019270705 | 1 | 5   | negative regulation of release of sequestered calcium ion into cytosol     | TRDN                    |
| GO:0006303 | 0.019963512 | 2 | 35  | double-strand break repair via nonhomologous end joining                   | LIG4,DCLRE1A            |
| GO:0003383 | 0.020227679 | 1 | 3   | apical constriction                                                        | FRMD1                   |
| GO:0000726 | 0.020662114 | 2 | 36  | non-recombinational repair                                                 | LIG4,DCLRE1A            |
| GO:0071922 | 0.021026313 | 1 | 4   | regulation of cohesin loading                                              | HDAC8                   |
| GO:0033555 | 0.021445255 | 2 | 43  | multicellular organismal response to stress                                | KALRN,PENK              |
| GO:1903320 | 0.02177588  | 4 | 192 | regulation of protein modification by small protein conjugation or removal | NMI,RNF4,HDAC8,PSMD5    |
| GO:0034599 | 0.022024418 | 3 | 109 | cellular response to oxidative stress                                      | ECT2,ZNF277,PENK        |
| GO:0072089 | 0.022793251 | 2 | 40  | stem cell proliferation                                                    | ETV7,PAFAH1B1           |
| GO:0006333 | 0.022959474 | 2 | 42  | chromatin assembly or disassembly                                          | CENPC,HDAC8             |
| GO:0018214 | 0.023800491 | 1 | 4   | protein carboxylation                                                      | GGCX                    |
| GO:0071042 | 0.024455405 | 1 | 5   | nuclear polyadenylation-dependent mRNA catabolic process                   | EXOSC8                  |
| GO:0036035 | 0.025061168 | 1 | 4   | osteoclast development                                                     | PAFAH1B1                |
| GO:0071305 | 0.025741852 | 1 | 5   | cellular response to vitamin D                                             | PENK                    |
| GO:0031087 | 0.025944624 | 1 | 5   | deadenylation-independent decapping of nuclear-transcribed mRNA            | DCP1B                   |
| GO:0051029 | 0.026657968 | 1 | 5   | rRNA transport                                                             | MRPL18                  |
| GO:0006970 | 0.027105015 | 2 | 45  | response to osmotic stress                                                 | HNMT,MAP7D3             |
| GO:0060359 | 0.027107214 | 2 | 45  | response to ammonium ion                                                   | HNMT,PENK               |
| GO:0002347 | 0.027455927 | 1 | 5   | response to tumor cell                                                     | HNMT                    |

|            |             |   |     |                                                                                                                                  |                                 |
|------------|-------------|---|-----|----------------------------------------------------------------------------------------------------------------------------------|---------------------------------|
| GO:0006013 | 0.027877274 | 1 | 5   | mannose metabolic process                                                                                                        | ENSACAG00000003913              |
| GO:0051865 | 0.028274314 | 2 | 47  | protein autoubiquitination                                                                                                       | RNF13,RNF4                      |
| GO:0033152 | 0.02848869  | 1 | 5   | immunoglobulin V(D)J recombination                                                                                               | LIG4                            |
| GO:0050885 | 0.029023695 | 2 | 45  | neuromuscular process controlling balance                                                                                        | GIGYF2,PAFAH1B1                 |
| GO:0035166 | 0.030274801 | 1 | 6   | post-embryonic hemopoiesis                                                                                                       | MYO1E                           |
| GO:0051660 | 0.031152567 | 1 | 5   | establishment of centrosome localization                                                                                         | PAFAH1B1                        |
| GO:0085020 | 0.031170211 | 1 | 6   | protein K6-linked ubiquitination                                                                                                 | RNF4                            |
| GO:0009451 | 0.031440402 | 3 | 122 | RNA modification                                                                                                                 | RPUSD4,TRUB2,TRDMT1             |
| GO:0030048 | 0.031622752 | 2 | 44  | actin filament-based movement                                                                                                    | FRMD1,MYO1E                     |
| GO:0048013 | 0.032274808 | 2 | 47  | ephrin receptor signaling pathway                                                                                                | KALRN,CDK5R1                    |
| GO:0016078 | 0.033818488 | 1 | 7   | tRNA catabolic process                                                                                                           | EXOSC8                          |
| GO:0006122 | 0.033967584 | 1 | 8   | mitochondrial electron transport, ubiquinol to cytochrome c                                                                      | UQCRC2                          |
| GO:0051383 | 0.034194114 | 1 | 8   | kinetochore organization                                                                                                         | CENPC                           |
| GO:0030029 | 0.034331166 | 5 | 301 | actin filament-based process                                                                                                     | NPHS2,MYL6,FRMD1,PAFAH1B1,MYO1E |
| GO:0031848 | 0.034796002 | 1 | 6   | protection from non-homologous end joining at telomere                                                                           | DCLRE1A                         |
| GO:0043247 | 0.034796002 | 1 | 6   | telomere maintenance in response to DNA damage                                                                                   | DCLRE1A                         |
| GO:0006691 | 0.036331756 | 1 | 7   | leukotriene metabolic process                                                                                                    | LTA4H                           |
| GO:0032049 | 0.038326495 | 1 | 7   | cardiolipin biosynthetic process                                                                                                 | PGS1                            |
| GO:0048569 | 0.039530939 | 1 | 8   | post-embryonic animal organ development                                                                                          | MYO1E                           |
| GO:2000574 | 0.040112201 | 1 | 7   | regulation of microtubule motor activity                                                                                         | PAFAH1B1                        |
| GO:0034427 | 0.041431739 | 1 | 9   | nuclear-transcribed mRNA catabolic process, exonucleolytic, 3'-5'                                                                | EXOSC8                          |
| GO:0045576 | 0.042120474 | 1 | 8   | mast cell activation                                                                                                             | LCP2                            |
| GO:0051103 | 0.042264304 | 1 | 7   | DNA ligation involved in DNA repair                                                                                              | LIG4                            |
| GO:0032486 | 0.042776035 | 1 | 9   | Rap protein signal transduction                                                                                                  | RAP2B                           |
| GO:0043633 | 0.043141913 | 1 | 9   | polyadenylation-dependent RNA catabolic process                                                                                  | EXOSC8                          |
| GO:0000467 | 0.04317038  | 1 | 9   | exonucleolytic trimming to generate mature 3'-end of 5.8S rRNA from tricistronic rRNA transcript (SSU-rRNA, 5.8S rRNA, LSU-rRNA) | EXOSC8                          |
| GO:0002118 | 0.043192629 | 1 | 8   | aggressive behavior                                                                                                              | PENK                            |

|            |             |   |     |                                                 |                      |
|------------|-------------|---|-----|-------------------------------------------------|----------------------|
| GO:0052805 | 0.044501213 | 1 | 7   | imidazole-containing compound catabolic process | HNMT                 |
| GO:0006302 | 0.045499126 | 3 | 138 | double-strand break repair                      | LIG4,CCDC155,DCLRE1A |
| GO:0014902 | 0.045553042 | 1 | 8   | myotube differentiation                         | TRDN                 |
| GO:0001836 | 0.046381646 | 1 | 11  | release of cytochrome c from mitochondria       | ENSACAG00000002984   |
| GO:0031119 | 0.046559321 | 1 | 8   | tRNA pseudouridine synthesis                    | RPUSD4               |
| GO:0033169 | 0.04709722  | 1 | 7   | histone H3-K9 demethylation                     | ENSACAG00000004592   |
| GO:0035235 | 0.047916031 | 1 | 8   | ionotropic glutamate receptor signaling pathway | CDK5R1               |
| GO:0006703 | 0.049427184 | 1 | 10  | estrogen biosynthetic process                   | ENSACAG00000000510   |

**Table S8. PSGs identified on branch 3 of lizard.**

| Ensembl Prot ID    | Ensembl Gene ID    | Ensembl Trans ID   | HNGC Name |
|--------------------|--------------------|--------------------|-----------|
| ENSACAP00000017617 | ENSACAG00000017890 | ENSACAT00000017963 | FRMD6     |
| ENSACAP00000021464 | ENSACAG00000022350 | ENSACAT00000028958 | GCNT2     |
| ENSACAP00000013774 | ENSACAG00000014000 | ENSACAT00000014055 | CCDC150   |
| ENSACAP00000004262 | ENSACAG00000004398 | ENSACAT00000004361 | CCK       |
| ENSACAP00000008877 | ENSACAG00000009089 | ENSACAT00000009068 | FTSJ2     |
| ENSACAP00000008525 | ENSACAG00000008687 | ENSACAT00000008708 | BRAT1     |
| ENSACAP00000007909 | ENSACAG00000008064 | ENSACAT00000008075 | PGPEP1L   |
| ENSACAP00000006257 | ENSACAG00000006391 | ENSACAT00000006396 |           |
| ENSACAP00000001831 | ENSACAG00000001902 | ENSACAT00000001875 | BAIAP2L1  |
| ENSACAP00000016271 | ENSACAG00000016477 | ENSACAT00000016595 | GRIPAP1   |
| ENSACAP00000020903 | ENSACAG00000027313 | ENSACAT00000027467 | APOA1BP   |
| ENSACAP00000012897 | ENSACAG00000013107 | ENSACAT00000013155 | BUB1      |
| ENSACAP00000016378 | ENSACAG00000016634 | ENSACAT00000016702 | CHMP7     |
| ENSACAP00000004552 | ENSACAG00000004469 | ENSACAT00000004657 |           |
| ENSACAP00000004695 | ENSACAG00000004715 | ENSACAT00000004802 | PER1      |
| ENSACAP00000003181 | ENSACAG00000003268 | ENSACAT00000003262 | WRAP53    |
| ENSACAP00000000726 | ENSACAG00000000734 | ENSACAT00000000750 | CEP95     |
| ENSACAP00000019130 | ENSACAG00000022469 | ENSACAT00000023799 | INHBE     |

|                    |                    |                    |          |
|--------------------|--------------------|--------------------|----------|
| ENSACAP00000003224 | ENSACAG00000002862 | ENSACAT00000003307 | KIF5C    |
| ENSACAP00000006395 | ENSACAG00000006551 | ENSACAT00000006538 |          |
| ENSACAP00000004419 | ENSACAG00000004481 | ENSACAT00000004519 | MTO1     |
| ENSACAP00000006195 | ENSACAG00000006333 | ENSACAT00000006332 | NOP16    |
| ENSACAP00000015761 | ENSACAG00000016002 | ENSACAT00000016077 | MATN2    |
| ENSACAP00000003548 | ENSACAG00000003615 | ENSACAT00000003636 | RNF126   |
| ENSACAP00000007021 | ENSACAG00000007102 | ENSACAT00000007172 | PGM2     |
| ENSACAP00000013508 | ENSACAG00000013732 | ENSACAT00000013786 | IMPA1    |
| ENSACAP00000001731 | ENSACAG00000001829 | ENSACAT00000001771 | CPLX1    |
| ENSACAP00000017375 | ENSACAG00000017604 | ENSACAT00000017716 | COPG2    |
| ENSACAP00000012836 | ENSACAG00000013059 | ENSACAT00000013093 | JPH1     |
| ENSACAP00000015309 | ENSACAG00000015563 | ENSACAT00000015621 | MPHOSPH9 |
| ENSACAP00000004170 | ENSACAG00000004294 | ENSACAT00000004269 | PPP1R2   |
| ENSACAP00000000325 | ENSACAG00000000339 | ENSACAT00000000339 | NPDC1    |
| ENSACAP00000003120 | ENSACAG00000003220 | ENSACAT00000003199 | VIMP     |
| ENSACAP00000015856 | ENSACAG00000016141 | ENSACAT00000016173 | STEAP3   |
| ENSACAP00000006742 | ENSACAG00000006893 | ENSACAT00000006888 | PKMYT1   |
| ENSACAP00000023079 | ENSACAG00000029390 | ENSACAT00000030500 |          |
| ENSACAP00000001571 | ENSACAG00000001644 | ENSACAT00000001608 | CCP110   |
| ENSACAP00000004163 | ENSACAG00000004288 | ENSACAT00000004262 | OVCH2    |
| ENSACAP00000023121 | ENSACAG00000028892 | ENSACAT00000030541 | TOR1AIP1 |
| ENSACAP00000005208 | ENSACAG00000005306 | ENSACAT00000005325 | EXD2     |
| ENSACAP00000012123 | ENSACAG00000012336 | ENSACAT00000012368 | NPHS2    |
| ENSACAP00000017589 | ENSACAG00000017863 | ENSACAT00000017935 | RNF125   |
| ENSACAP00000012930 | ENSACAG00000013117 | ENSACAT00000013188 |          |
| ENSACAP00000011701 | ENSACAG00000011812 | ENSACAT00000011942 | HDAC3    |
| ENSACAP00000001278 | ENSACAG00000001224 | ENSACAT00000001311 | PPIL2    |
| ENSACAP00000011214 | ENSACAG00000011373 | ENSACAT00000011450 | AGK      |
| ENSACAP00000008587 | ENSACAG00000008478 | ENSACAT00000008770 | JAK1     |
| ENSACAP00000002239 | ENSACAG00000002353 | ENSACAT00000002299 |          |

|                    |                    |                    |         |
|--------------------|--------------------|--------------------|---------|
| ENSACAP0000002228  | ENSACAG0000002322  | ENSACAT0000002288  |         |
| ENSACAP0000005613  | ENSACAG0000005654  | ENSACAT0000005735  | CAMK1G  |
| ENSACAP0000001539  | ENSACAG0000001584  | ENSACAT0000001575  | PRPS2   |
| ENSACAP0000008363  | ENSACAG0000008475  | ENSACAT0000008544  | SNTA1   |
| ENSACAP0000007611  | ENSACAG0000007720  | ENSACAT0000007772  | TRMU    |
| ENSACAP00000016261 | ENSACAG00000016502 | ENSACAT00000016585 | ETFDH   |
| ENSACAP00000003266 | ENSACAG00000003023 | ENSACAT00000003349 | LRBA    |
| ENSACAP00000003492 | ENSACAG00000003495 | ENSACAT00000003578 | DCLK2   |
| ENSACAP00000002092 | ENSACAG00000002189 | ENSACAT00000002147 | ZMYM2   |
| ENSACAP00000012424 | ENSACAG00000012630 | ENSACAT00000012677 | CCNA2   |
| ENSACAP00000012475 | ENSACAG00000012650 | ENSACAT00000012731 |         |
| ENSACAP00000008867 | ENSACAG00000009000 | ENSACAT00000009058 | DEPDC1B |
| ENSACAP00000009215 | ENSACAG00000009351 | ENSACAT00000009408 | UTP15   |
| ENSACAP00000001136 | ENSACAG00000001252 | ENSACAT00000001168 | TJP2    |
| ENSACAP00000005113 | ENSACAG00000005220 | ENSACAT00000005229 |         |
| ENSACAP00000022884 | ENSACAG00000028675 | ENSACAT00000030302 | TRIM44  |
| ENSACAP00000008585 | ENSACAG00000008760 | ENSACAT00000008768 | MRVI1   |
| ENSACAP00000000070 | ENSACAG00000000071 | ENSACAT00000000071 | PSMG1   |
| ENSACAP00000021985 | ENSACAG00000029328 | ENSACAT00000029403 | HMMR    |
| ENSACAP00000004933 | ENSACAG00000004980 | ENSACAT00000005046 | MCM3AP  |
| ENSACAP00000015318 | ENSACAG00000015374 | ENSACAT00000015630 | RANBP17 |
| ENSACAP00000016106 | ENSACAG00000016325 | ENSACAT00000016427 | SLC23A1 |
| ENSACAP00000001448 | ENSACAG00000001543 | ENSACAT00000001483 | THAP5   |
| ENSACAP00000005778 | ENSACAG00000005778 | ENSACAT00000005905 | DDX41   |
| ENSACAP00000013318 | ENSACAG00000013515 | ENSACAT00000013588 | XPC     |
| ENSACAP00000011025 | ENSACAG00000011199 | ENSACAT00000011253 |         |
| ENSACAP00000021883 | ENSACAG00000028683 | ENSACAT00000029301 |         |
| ENSACAP00000001283 | ENSACAG00000001292 | ENSACAT00000001316 | DIEXF   |

---

**Table S9. GO terms associated with PSGs identified on lizard branch 3.**

| category   | pvalue      | numDE<br>InCat | numIn<br>Cat | term                                                                           | GeneNames                            |
|------------|-------------|----------------|--------------|--------------------------------------------------------------------------------|--------------------------------------|
| GO:0009820 | 0.00022084  | 2              | 6            | alkaloid metabolic process                                                     | ENSACAG00000011199,APOA1BP           |
| GO:1900864 | 0.000508584 | 2              | 8            | mitochondrial RNA modification                                                 | TRMU,MTO1                            |
| GO:0070525 | 0.000598271 | 2              | 9            | tRNA threonylcarbamoyladenosine metabolic process                              | TRMU,MTO1                            |
| GO:0002098 | 0.000807311 | 2              | 10           | tRNA wobble uridine modification                                               | TRMU,MTO1                            |
| GO:0002097 | 0.001181535 | 2              | 13           | tRNA wobble base modification                                                  | TRMU,MTO1                            |
| GO:0046085 | 0.001719259 | 2              | 16           | adenosine metabolic process                                                    | TRMU,MTO1                            |
| GO:0071629 | 0.002797871 | 1              | 1            | cytoplasm-associated proteasomal ubiquitin-dependent protein catabolic process | RNF126                               |
| GO:0080129 | 0.002915312 | 1              | 1            | proteasome core complex assembly                                               | PSMG1                                |
| GO:0032203 | 0.003517897 | 1              | 1            | telomere formation via telomerase                                              | WRAP53                               |
| GO:0090671 | 0.003517897 | 1              | 1            | telomerase RNA localization to Cajal body                                      | WRAP53                               |
| GO:0015882 | 0.00497018  | 1              | 1            | L-ascorbic acid transport                                                      | SLC23A1                              |
| GO:0070837 | 0.00497018  | 1              | 1            | dehydroascorbic acid transport                                                 | SLC23A1                              |
| GO:0070904 | 0.00497018  | 1              | 1            | transepithelial L-ascorbic acid transport                                      | SLC23A1                              |
| GO:0006769 | 0.005257033 | 1              | 2            | nicotinamide metabolic process                                                 | APOA1BP                              |
| GO:0000959 | 0.00582725  | 2              | 27           | mitochondrial RNA metabolic process                                            | TRMU,MTO1                            |
| GO:0032202 | 0.006026214 | 1              | 2            | telomere assembly                                                              | WRAP53                               |
| GO:0031104 | 0.00643294  | 1              | 1            | dendrite regeneration                                                          | MATN2                                |
| GO:0017144 | 0.006990731 | 2              | 31           | drug metabolic process                                                         | ENSACAG00000013117,ENSACAG0000011199 |
| GO:0034470 | 0.007075211 | 5              | 312          | ncRNA processing                                                               | TRMU,UTP15,DIEXF,MTO1,FTSJ2          |
| GO:1904851 | 0.008100695 | 1              | 2            | positive regulation of establishment of protein localization to telomere       | WRAP53                               |
| GO:0038110 | 0.009521418 | 1              | 2            | interleukin-2-mediated signaling pathway                                       | JAK1                                 |
| GO:0006021 | 0.009654662 | 1              | 3            | inositol biosynthetic process                                                  | IMPA1                                |
| GO:0072249 | 0.010123345 | 1              | 2            | metanephric glomerular visceral epithelial cell development                    | NPHS2                                |
| GO:0046882 | 0.01053161  | 1              | 3            | negative regulation of follicle-stimulating hormone secretion                  | INHBE                                |

|            |             |   |     |                                                                                                              |                             |
|------------|-------------|---|-----|--------------------------------------------------------------------------------------------------------------|-----------------------------|
| GO:0048178 | 0.01053161  | 1 | 3   | negative regulation of hepatocyte growth factor biosynthetic process                                         | INHBE                       |
| GO:0006015 | 0.010763553 | 1 | 3   | 5-phosphoribose 1-diphosphate biosynthetic process                                                           | PRPS2                       |
| GO:0046391 | 0.010763553 | 1 | 3   | 5-phosphoribose 1-diphosphate metabolic process                                                              | PRPS2                       |
| GO:0071763 | 0.011441129 | 1 | 3   | nuclear membrane organization                                                                                | TOR1AIP1                    |
| GO:0000453 | 0.011476722 | 1 | 3   | enzyme-directed rRNA 2'-O-methylation                                                                        | FTSJ2                       |
| GO:0009451 | 0.011491803 | 3 | 122 | RNA modification                                                                                             | TRMU,MTO1,FTSJ2             |
| GO:0034637 | 0.011881345 | 2 | 42  | cellular carbohydrate biosynthetic process                                                                   | PGM2,IMPA1                  |
| GO:2000323 | 0.012233757 | 1 | 3   | negative regulation of glucocorticoid receptor signaling pathway                                             | PER1                        |
| GO:0034504 | 0.012541147 | 3 | 106 | protein localization to nucleus                                                                              | MCM3AP,RANBP17,TOR1AIP1     |
| GO:0060546 | 0.013064698 | 1 | 4   | negative regulation of necroptotic process                                                                   | ENSACAG00000012650          |
| GO:0044262 | 0.013237757 | 3 | 120 | cellular carbohydrate metabolic process                                                                      | PGM2,IMPA1,PPP1R2           |
| GO:0097167 | 0.013318414 | 1 | 3   | circadian regulation of translation                                                                          | PER1                        |
| GO:0034227 | 0.013498027 | 1 | 4   | tRNA thio-modification                                                                                       | TRMU                        |
| GO:0046448 | 0.013792929 | 1 | 3   | tropane alkaloid metabolic process                                                                           | ENSACAG00000011199          |
| GO:0050783 | 0.013792929 | 1 | 3   | cocaine metabolic process                                                                                    | ENSACAG00000011199          |
| GO:0019388 | 0.014523449 | 1 | 4   | galactose catabolic process                                                                                  | PGM2                        |
| GO:0034116 | 0.015561132 | 1 | 4   | positive regulation of heterotypic cell-cell adhesion                                                        | GCNT2                       |
| GO:0003383 | 0.015762842 | 1 | 3   | apical constriction                                                                                          | FRMD6                       |
| GO:0060278 | 0.016160052 | 1 | 4   | regulation of ovulation                                                                                      | INHBE                       |
| GO:0036438 | 0.016322279 | 1 | 4   | maintenance of lens transparency                                                                             | GCNT2                       |
| GO:0072524 | 0.016352706 | 2 | 54  | pyridine-containing compound metabolic process                                                               | APOA1BP,PGM2                |
| GO:1900094 | 0.016797406 | 1 | 5   | regulation of transcription from RNA polymerase II promoter involved in determination of left/right symmetry | INHBE                       |
| GO:0001510 | 0.018148483 | 2 | 51  | RNA methylation                                                                                              | MTO1,FTSJ2                  |
| GO:0014016 | 0.019139512 | 1 | 5   | neuroblast differentiation                                                                                   | ENSACAG00000011199          |
| GO:0046128 | 0.019360801 | 3 | 157 | purine ribonucleoside metabolic process                                                                      | PRPS2,TRMU,MTO1             |
| GO:0034660 | 0.020190001 | 5 | 391 | ncRNA metabolic process                                                                                      | TRMU,UTP15,DIEXF,MTO1,FTSJ2 |
| GO:0015931 | 0.021653218 | 3 | 141 | nucleobase-containing compound transport                                                                     | MCM3AP,RANBP17,KIF5C        |
| GO:0051593 | 0.023441205 | 1 | 7   | response to folic acid                                                                                       | ENSACAG00000011199          |
| GO:0006112 | 0.023545918 | 2 | 56  | energy reserve metabolic process                                                                             | PGM2,PPP1R2                 |

|            |             |   |     |                                                                                  |                          |
|------------|-------------|---|-----|----------------------------------------------------------------------------------|--------------------------|
| GO:1901990 | 0.024769075 | 3 | 151 | regulation of mitotic cell cycle phase transition                                | CCNA2,XPC,BUB1           |
| GO:0021930 | 0.025598581 | 1 | 6   | cerebellar granule cell precursor proliferation                                  | PSMG1                    |
| GO:2000241 | 0.025615592 | 2 | 65  | regulation of reproductive process                                               | ENSACAG00000005220,INHBE |
| GO:1990001 | 0.027631413 | 1 | 7   | inhibition of cysteine-type endopeptidase activity involved in apoptotic process | ENSACAG00000012650       |
| GO:0015677 | 0.028171814 | 1 | 6   | copper ion import                                                                | STEAP3                   |
| GO:0060467 | 0.030402548 | 1 | 8   | negative regulation of fertilization                                             | ENSACAG00000005220       |
| GO:0006091 | 0.031217663 | 3 | 179 | generation of precursor metabolites and energy                                   | ETFDH,PGM2,PPP1R2        |
| GO:0006098 | 0.031597729 | 1 | 9   | pentose-phosphate shunt                                                          | PGM2                     |
| GO:0010996 | 0.032293919 | 1 | 7   | response to auditory stimulus                                                    | XPC                      |
| GO:0046838 | 0.033703708 | 1 | 9   | phosphorylated carbohydrate dephosphorylation                                    | IMPA1                    |
| GO:0008347 | 0.034222369 | 1 | 8   | glial cell migration                                                             | MATN2                    |
| GO:0006012 | 0.034686005 | 1 | 9   | galactose metabolic process                                                      | PGM2                     |
| GO:0010224 | 0.035094327 | 1 | 9   | response to UV-B                                                                 | XPC                      |
| GO:0070633 | 0.035132567 | 1 | 8   | transepithelial transport                                                        | SLC23A1                  |
| GO:0045324 | 0.038573137 | 1 | 10  | late endosome to vacuole transport                                               | CHMP7                    |
| GO:1903672 | 0.038626116 | 1 | 9   | positive regulation of sprouting angiogenesis                                    | JAK1                     |
| GO:0035458 | 0.039174291 | 1 | 10  | cellular response to interferon-beta                                             | DDX41                    |
| GO:0042634 | 0.039541826 | 1 | 9   | regulation of hair cycle                                                         | PER1                     |
| GO:0090557 | 0.040400773 | 1 | 8   | establishment of endothelial intestinal barrier                                  | TJP2                     |
| GO:0070932 | 0.040481975 | 1 | 9   | histone H3 deacetylation                                                         | PER1                     |
| GO:2000251 | 0.041177491 | 1 | 11  | positive regulation of actin cytoskeleton reorganization                         | BAIAP2L1                 |
| GO:1901657 | 0.041244906 | 3 | 218 | glycosyl compound metabolic process                                              | PRPS2,TRMU,MTO1          |
| GO:0000717 | 0.041616079 | 1 | 8   | nucleotide-excision repair, DNA duplex unwinding                                 | XPC                      |
| GO:0000715 | 0.041700756 | 1 | 8   | nucleotide-excision repair, DNA damage recognition                               | XPC                      |
| GO:0032053 | 0.042594554 | 1 | 8   | ciliary basal body organization                                                  | CCP110                   |
| GO:0021860 | 0.042704037 | 1 | 8   | pyramidal neuron development                                                     | DCLK2                    |
| GO:0000920 | 0.04370835  | 1 | 12  | cell separation after cytokinesis                                                | CHMP7                    |
| GO:0030214 | 0.044161931 | 1 | 9   | hyaluronan catabolic process                                                     | HMMR                     |
| GO:0005976 | 0.045021827 | 2 | 81  | polysaccharide metabolic process                                                 | PGM2,PPP1R2              |



|            |             |   |    |                                                                                           |                    |
|------------|-------------|---|----|-------------------------------------------------------------------------------------------|--------------------|
| GO:0043153 | 0.046552698 | 1 | 12 | entrainment of circadian clock by photoperiod                                             | PER1               |
| GO:0046386 | 0.047433296 | 1 | 15 | deoxyribose phosphate catabolic process                                                   | PGM2               |
| GO:0019695 | 0.047719006 | 1 | 10 | choline metabolic process                                                                 | ENSACAG00000011199 |
| GO:0043162 | 0.047757903 | 1 | 15 | ubiquitin-dependent protein catabolic process via the multivesicular body sorting pathway | RNF126             |
| GO:0043248 | 0.047850153 | 1 | 16 | proteasome assembly                                                                       | PSMG1              |
| GO:0042273 | 0.048493215 | 1 | 15 | ribosomal large subunit biogenesis                                                        | NOP16              |
| GO:0031099 | 0.048761255 | 2 | 95 | regeneration                                                                              | PRPS2,MATN2        |
| GO:0016079 | 0.048922482 | 1 | 12 | synaptic vesicle exocytosis                                                               | CPLX1              |
| GO:0060334 | 0.049314998 | 1 | 12 | regulation of interferon-gamma-mediated signaling pathway                                 | JAK1               |
| GO:0051156 | 0.049641284 | 1 | 14 | glucose 6-phosphate metabolic process                                                     | PGM2               |

**Table S10. PSGs identified on branch 6 of frog.**

| <b>Ensembl Prot ID</b> | <b>Ensembl Gene ID</b> | <b>Ensembl Trans ID</b> | <b>HNGC Name</b> |
|------------------------|------------------------|-------------------------|------------------|
| ENSACAP00000009832     | ENSACAG00000009950     | ENSACAT00000010033      | LGALS4           |
| ENSACAP00000012790     | ENSACAG00000012967     | ENSACAT00000013046      | UBE4B            |
| ENSACAP00000011157     | ENSACAG00000010939     | ENSACAT00000011389      | TLN1             |
| ENSACAP00000007335     | ENSACAG00000007457     | ENSACAT00000007491      | TDRKH            |
| ENSACAP00000011041     | ENSACAG00000011220     | ENSACAT00000011269      | SLC35F6          |
| ENSACAP00000020529     | ENSACAG00000022067     | ENSACAT00000026115      | AEBP1            |
| ENSACAP00000005716     | ENSACAG00000005606     | ENSACAT00000005841      | HK2              |
| ENSACAP00000000381     | ENSACAG00000000472     | ENSACAT00000000396      | FAS              |
| ENSACAP00000009299     | ENSACAG00000009333     | ENSACAT00000009493      | FLII             |
| ENSACAP00000008336     | ENSACAG00000008508     | ENSACAT00000008517      | GSTCD            |
| ENSACAP00000009283     | ENSACAG00000009414     | ENSACAT00000009476      | KMO              |
| ENSACAP00000010744     | ENSACAG00000010772     | ENSACAT00000010966      |                  |
| ENSACAP00000007089     | ENSACAG00000007224     | ENSACAT00000007242      | LPCAT3           |
| ENSACAP00000016788     | ENSACAG00000017030     | ENSACAT00000017119      |                  |
| ENSACAP00000006254     | ENSACAG00000006400     | ENSACAT00000006393      | RAB28            |

|                    |                    |                    |         |
|--------------------|--------------------|--------------------|---------|
| ENSACAP0000007849  | ENSACAG0000007907  | ENSACAT0000008015  | FLOT2   |
| ENSACAP0000003664  | ENSACAG0000003722  | ENSACAT0000003754  |         |
| ENSACAP00000017289 | ENSACAG00000017545 | ENSACAT00000017629 |         |
| ENSACAP00000011692 | ENSACAG00000011940 | ENSACAT00000011933 | TFB2M   |
| ENSACAP0000000518  | ENSACAG0000000548  | ENSACAT0000000536  | SLC37A2 |
| ENSACAP00000009821 | ENSACAG00000010023 | ENSACAT00000010021 | CFAP53  |
| ENSACAP00000003057 | ENSACAG00000003131 | ENSACAT00000003135 | RPRD2   |
| ENSACAP00000005278 | ENSACAG00000005344 | ENSACAT00000005395 | HM13    |
| ENSACAP00000002920 | ENSACAG00000002994 | ENSACAT00000002994 | VPS52   |
| ENSACAP00000004168 | ENSACAG00000004303 | ENSACAT00000004267 | ANKRD53 |
| ENSACAP00000013931 | ENSACAG00000014164 | ENSACAT00000014217 | LZTFL1  |
| ENSACAP00000013484 | ENSACAG00000013728 | ENSACAT00000013762 | CRTAP   |
| ENSACAP00000020455 | ENSACAG00000024096 | ENSACAT00000026031 | MAPK15  |
| ENSACAP00000019308 | ENSACAG00000009983 | ENSACAT00000023910 | ABRA    |
| ENSACAP00000010018 | ENSACAG00000010181 | ENSACAT00000010225 | INTS9   |
| ENSACAP00000008156 | ENSACAG00000008317 | ENSACAT00000008331 | TXNDC9  |
| ENSACAP00000003556 | ENSACAG00000003644 | ENSACAT00000003644 | NMI     |
| ENSACAP00000005858 | ENSACAG00000005760 | ENSACAT00000005987 | CHD7    |
| ENSACAP00000013614 | ENSACAG00000013758 | ENSACAT00000013894 | RAPGEF1 |
| ENSACAP00000006716 | ENSACAG00000006626 | ENSACAT00000006862 |         |
| ENSACAP00000001737 | ENSACAG00000001799 | ENSACAT00000001777 | ZNF521  |
| ENSACAP00000023204 | ENSACAG00000029360 | ENSACAT00000030624 |         |
| ENSACAP00000008354 | ENSACAG00000008521 | ENSACAT00000008535 | COMTD1  |
| ENSACAP00000005395 | ENSACAG00000005301 | ENSACAT00000005512 | VILL    |
| ENSACAP00000014119 | ENSACAG00000014302 | ENSACAT00000014409 | LONP2   |
| ENSACAP00000003647 | ENSACAG00000003431 | ENSACAT00000003736 | TNC     |
| ENSACAP00000001626 | ENSACAG00000001638 | ENSACAT00000001665 | ZC3HC1  |
| ENSACAP00000020092 | ENSACAG00000024726 | ENSACAT00000027932 |         |
| ENSACAP00000001640 | ENSACAG00000001752 | ENSACAT00000001679 | CCDC78  |
| ENSACAP00000002201 | ENSACAG00000002300 | ENSACAT00000002261 | NLRX1   |

|                    |                    |                    |          |
|--------------------|--------------------|--------------------|----------|
| ENSACAP00000014251 | ENSACAG00000014410 | ENSACAT00000014544 | CRISPLD2 |
| ENSACAP00000021556 | ENSACAG00000025660 | ENSACAT00000026730 |          |
| ENSACAP00000012316 | ENSACAG00000012414 | ENSACAT00000012569 | COPB1    |
| ENSACAP00000008624 | ENSACAG00000008771 | ENSACAT00000008807 | CTSK     |
| ENSACAP00000016107 | ENSACAG00000016384 | ENSACAT00000016428 | SPAG1    |
| ENSACAP00000009331 | ENSACAG00000009549 | ENSACAT00000009526 | TRAFD1   |
| ENSACAP00000013933 | ENSACAG00000014198 | ENSACAT00000014219 | MGME1    |
| ENSACAP00000003369 | ENSACAG00000003465 | ENSACAT00000003452 | ZNF574   |
| ENSACAP00000012268 | ENSACAG00000012487 | ENSACAT00000012519 | BCL2L13  |
| ENSACAP00000012559 | ENSACAG00000012773 | ENSACAT00000012815 | SLC37A3  |
| ENSACAP00000003454 | ENSACAG00000003528 | ENSACAT00000003540 | SASS6    |
| ENSACAP00000015408 | ENSACAG00000015569 | ENSACAT00000015721 | APPL2    |
| ENSACAP00000016382 | ENSACAG00000016659 | ENSACAT00000016706 | HMOX1    |
| ENSACAP00000007993 | ENSACAG00000008160 | ENSACAT00000008164 | C7orf57  |
| ENSACAP00000001168 | ENSACAG00000001238 | ENSACAT00000001201 | LRRC8C   |
| ENSACAP00000009495 | ENSACAG00000009576 | ENSACAT00000009692 | SDHA     |
| ENSACAP00000020588 | ENSACAG00000008144 | ENSACAT00000026899 | EFCAB7   |
| ENSACAP00000008386 | ENSACAG00000008484 | ENSACAT00000008567 | SMYD1    |
| ENSACAP00000012479 | ENSACAG00000012654 | ENSACAT00000012735 | CEP83    |
| ENSACAP00000015527 | ENSACAG00000015761 | ENSACAT00000015841 | PDCD4    |
| ENSACAP00000017077 | ENSACAG00000017346 | ENSACAT00000017412 | KANSL1   |
| ENSACAP00000016873 | ENSACAG00000017131 | ENSACAT00000017208 | SEC23IP  |
| ENSACAP00000005181 | ENSACAG00000005084 | ENSACAT00000005298 | COL1A1   |
| ENSACAP00000005187 | ENSACAG00000005261 | ENSACAT00000005304 | IPO9     |
| ENSACAP00000006657 | ENSACAG00000006739 | ENSACAT00000006803 | RALGAPB  |
| ENSACAP00000022907 | ENSACAG00000029016 | ENSACAT00000030325 | CD99     |
| ENSACAP00000004056 | ENSACAG00000004191 | ENSACAT00000004150 | MAB21L1  |
| ENSACAP00000002517 | ENSACAG00000002561 | ENSACAT00000002582 | CCDC81   |
| ENSACAP00000017420 | ENSACAG00000017672 | ENSACAT00000017762 | PLIN2    |
| ENSACAP00000010758 | ENSACAG00000010932 | ENSACAT00000010981 | CFP      |

|                    |                    |                    |         |
|--------------------|--------------------|--------------------|---------|
| ENSACAP00000018492 | ENSACAG00000023141 | ENSACAT00000022514 | RD3L    |
| ENSACAP00000008929 | ENSACAG00000008987 | ENSACAT00000009120 | LGMN    |
| ENSACAP00000016946 | ENSACAG00000017202 | ENSACAT00000017281 | ATF1    |
| ENSACAP00000014168 | ENSACAG00000014373 | ENSACAT00000014458 |         |
| ENSACAP00000004222 | ENSACAG00000004323 | ENSACAT00000004321 | CD44    |
| ENSACAP00000016889 | ENSACAG00000017105 | ENSACAT00000017224 | STXBP2  |
| ENSACAP00000010518 | ENSACAG00000010640 | ENSACAT00000010735 | MYLK    |
| ENSACAP00000017256 | ENSACAG00000017496 | ENSACAT00000017595 | TBCD    |
| ENSACAP00000006856 | ENSACAG00000006926 | ENSACAT00000007006 | CTNND1  |
| ENSACAP00000007659 | ENSACAG00000007694 | ENSACAT00000007823 | ACOX1   |
| ENSACAP00000022448 | ENSACAG00000008728 | ENSACAT00000029865 |         |
| ENSACAP00000018579 | ENSACAG00000009366 | ENSACAT00000026649 | PLEKHG3 |
| ENSACAP00000010282 | ENSACAG00000010434 | ENSACAT00000010494 | SIRT7   |
| ENSACAP00000008500 | ENSACAG00000008693 | ENSACAT00000008682 | TUSC2   |
| ENSACAP00000006476 | ENSACAG00000006619 | ENSACAT00000006621 | GLYCTK  |
| ENSACAP00000013318 | ENSACAG00000013515 | ENSACAT00000013588 | XPC     |
| ENSACAP00000011671 | ENSACAG00000011855 | ENSACAT00000011912 | CCDC174 |
| ENSACAP00000008228 | ENSACAG00000008206 | ENSACAT00000008405 | ADGRG6  |
| ENSACAP00000011882 | ENSACAG00000012116 | ENSACAT00000012126 | STK19   |
| ENSACAP00000011394 | ENSACAG00000011208 | ENSACAT00000011633 |         |
| ENSACAP00000010371 | ENSACAG00000010535 | ENSACAT00000010585 | ATF6B   |
| ENSACAP00000001116 | ENSACAG00000001130 | ENSACAT00000001148 | ABCB10  |
| ENSACAP00000002674 | ENSACAG00000002782 | ENSACAT00000002741 | ERMARD  |

**Table S11. GO terms associated with PSGs identified on frog branch 6.**

| category   | pvalue      | numDE<br>InCat | numIn<br>Cat | term                                              | GeneNames                   |
|------------|-------------|----------------|--------------|---------------------------------------------------|-----------------------------|
| GO:0032688 | 0.000402452 | 2              | 6            | negative regulation of interferon-beta production | NMI,NLRX1                   |
| GO:0008643 | 0.000472479 | 4              | 67           | carbohydrate transport                            | SLC37A3,SLC37A2,SLC35F6,HK2 |

|            |             |   |     |                                                                              |                                |
|------------|-------------|---|-----|------------------------------------------------------------------------------|--------------------------------|
| GO:0045824 | 0.000562715 | 3 | 29  | negative regulation of innate immune response                                | TRAFD1,NMI,NLRX1               |
| GO:0001909 | 0.001090705 | 2 | 11  | leukocyte mediated cytotoxicity                                              | STXBP2,TUSC2                   |
| GO:0051014 | 0.001254138 | 2 | 9   | actin filament severing                                                      | FLII,VILL                      |
| GO:0032618 | 0.002089888 | 1 | 1   | interleukin-15 production                                                    | TUSC2                          |
| GO:0052567 | 0.002089888 | 1 | 1   | response to defense-related host reactive oxygen species production          | TUSC2                          |
| GO:0071609 | 0.002089888 | 1 | 1   | chemokine (C-C motif) ligand 5 production                                    | TUSC2                          |
| GO:0016485 | 0.002297722 | 5 | 182 | protein processing                                                           | BCL2L13,LGMN,HM13,AEBP1,LO NP2 |
| GO:0006957 | 0.00275908  | 2 | 14  | complement activation, alternative pathway                                   | CFP,ENSACAG00000011208         |
| GO:0031113 | 0.004064604 | 2 | 18  | regulation of microtubule polymerization                                     | TBCD,ANKRD53                   |
| GO:1903564 | 0.004271243 | 1 | 1   | regulation of protein localization to cilium                                 | LZTFL1                         |
| GO:0006788 | 0.00455411  | 1 | 1   | heme oxidation                                                               | HMOX1                          |
| GO:0007072 | 0.004641887 | 1 | 1   | positive regulation of transcription involved in exit from mitosis           | SIRT7                          |
| GO:0043504 | 0.004651542 | 1 | 1   | mitochondrial DNA repair                                                     | MGME1                          |
| GO:0001906 | 0.005116983 | 2 | 22  | cell killing                                                                 | STXBP2,TUSC2                   |
| GO:0018400 | 0.005225641 | 1 | 1   | peptidyl-proline hydroxylation to 3-hydroxy-L-proline                        | CRTAP                          |
| GO:0098534 | 0.005246116 | 2 | 17  | centriole assembly                                                           | SASS6,CCDC78                   |
| GO:1903905 | 0.005447399 | 1 | 1   | positive regulation of establishment of T cell polarity                      | FLOT2                          |
| GO:0015794 | 0.005928903 | 1 | 1   | glycerol-3-phosphate transport                                               | SLC37A2                        |
| GO:0048611 | 0.006195778 | 1 | 1   | embryonic ectodermal digestive tract development                             | VPS52                          |
| GO:1904925 | 0.007299423 | 1 | 1   | positive regulation of mitophagy in response to mitochondrial depolarization | HK2                            |
| GO:0060690 | 0.007311921 | 1 | 1   | epithelial cell differentiation involved in salivary gland development       | CTNND1                         |
| GO:0042795 | 0.007759932 | 2 | 27  | snRNA transcription from RNA polymerase II promoter                          | RPRD2,INTS9                    |
| GO:0006391 | 0.008540247 | 1 | 2   | transcription initiation from mitochondrial promoter                         | TFB2M                          |
| GO:0032602 | 0.008879293 | 1 | 3   | chemokine production                                                         | TUSC2                          |
| GO:1902524 | 0.009678068 | 1 | 2   | positive regulation of protein K48-linked ubiquitination                     | NMI                            |
| GO:0008626 | 0.010321828 | 1 | 2   | granzyme-mediated apoptotic signaling pathway                                | UBE4B                          |
| GO:0006127 | 0.010327515 | 1 | 2   | glycerophosphate shuttle                                                     | SLC37A2                        |

|            |             |   |     |                                                                                           |                                                        |
|------------|-------------|---|-----|-------------------------------------------------------------------------------------------|--------------------------------------------------------|
| GO:0052646 | 0.010594766 | 2 | 29  | alditol phosphate metabolic process                                                       | LPCAT3,SLC37A2                                         |
| GO:1904211 | 0.011015362 | 1 | 3   | membrane protein proteolysis involved in retrograde protein transport, ER to cytosol      | HM13                                                   |
| GO:1901873 | 0.011482944 | 1 | 2   | regulation of post-translational protein modification                                     | CRTAP                                                  |
| GO:1901874 | 0.011482944 | 1 | 2   | negative regulation of post-translational protein modification                            | CRTAP                                                  |
| GO:0006091 | 0.011779115 | 4 | 179 | generation of precursor metabolites and energy                                            | SDHA,ACOX1,HK2,ENSACAG00000024726                      |
| GO:0036494 | 0.01182251  | 1 | 2   | positive regulation of translation initiation in response to endoplasmic reticulum stress | ENSACAG00000017545                                     |
| GO:0035795 | 0.012956846 | 1 | 2   | negative regulation of mitochondrial membrane permeability                                | HK2                                                    |
| GO:0050821 | 0.013042458 | 3 | 96  | protein stabilization                                                                     | IPO9,FLOT2,CRTAP                                       |
| GO:1902412 | 0.013121126 | 1 | 2   | regulation of mitotic cytokinesis                                                         | ANKRD53                                                |
| GO:0044860 | 0.013218964 | 1 | 2   | protein localization to plasma membrane raft                                              | FLOT2                                                  |
| GO:0045661 | 0.01391857  | 2 | 37  | regulation of myoblast differentiation                                                    | SMYD1,FLOT2                                            |
| GO:0042991 | 0.014766006 | 1 | 2   | transcription factor import into nucleus                                                  | IPO9                                                   |
| GO:0097006 | 0.015174572 | 1 | 3   | regulation of plasma lipoprotein particle levels                                          | LPCAT3                                                 |
| GO:0043420 | 0.015584362 | 1 | 3   | anthranilate metabolic process                                                            | KMO                                                    |
| GO:0006068 | 0.015943122 | 1 | 3   | ethanol catabolic process                                                                 | ENSACAG00000008728                                     |
| GO:0072656 | 0.019165467 | 1 | 4   | maintenance of protein location in mitochondrion                                          | HK2                                                    |
| GO:0019418 | 0.019229227 | 1 | 4   | sulfide oxidation                                                                         | ENSACAG00000003722                                     |
| GO:0070221 | 0.019229227 | 1 | 4   | sulfide oxidation, using sulfide:quinone oxidoreductase                                   | ENSACAG00000003722                                     |
| GO:0006105 | 0.019634254 | 1 | 3   | succinate metabolic process                                                               | SDHA                                                   |
| GO:0034354 | 0.019830362 | 1 | 4   | 'de novo' NAD biosynthetic process from tryptophan                                        | KMO                                                    |
| GO:0060689 | 0.020021925 | 1 | 3   | cell differentiation involved in salivary gland development                               | CTNND1                                                 |
| GO:0002252 | 0.020846947 | 5 | 322 | immune effector process                                                                   | CFP,STXBP2,TUSC2,ENSACAG00000011208,ENSACAG00000006626 |
| GO:0005981 | 0.020850007 | 1 | 5   | regulation of glycogen catabolic process                                                  | ENSACAG00000024726                                     |
| GO:0019805 | 0.023318553 | 1 | 4   | quinolinate biosynthetic process                                                          | KMO                                                    |
| GO:0060327 | 0.025015595 | 1 | 4   | cytoplasmic actin-based contraction involved in cell motility                             | VILL                                                   |
| GO:1902992 | 0.025494198 | 1 | 4   | negative regulation of amyloid precursor protein catabolic process                        | FLOT2                                                  |
| GO:0036500 | 0.025713156 | 1 | 4   | ATF6-mediated unfolded protein response                                                   | ATF6B                                                  |

|            |             |   |     |                                                              |                                   |
|------------|-------------|---|-----|--------------------------------------------------------------|-----------------------------------|
| GO:0001779 | 0.025945401 | 1 | 5   | natural killer cell differentiation                          | TUSC2                             |
| GO:0007021 | 0.026938925 | 1 | 8   | tubulin complex assembly                                     | TBCD                              |
| GO:0048278 | 0.027099102 | 2 | 54  | vesicle docking                                              | CEP83,STXBP2                      |
| GO:0015712 | 0.027792024 | 1 | 5   | hexose phosphate transport                                   | SLC37A2                           |
| GO:0015760 | 0.027792024 | 1 | 5   | glucose-6-phosphate transport                                | SLC37A2                           |
| GO:0010668 | 0.027828091 | 1 | 5   | ectodermal cell differentiation                              | VPS52                             |
| GO:0007023 | 0.028512214 | 1 | 6   | post-chaperonin tubulin folding pathway                      | TBCD                              |
| GO:0009617 | 0.029231918 | 3 | 146 | response to bacterium                                        | TUSC2,ENSACAG00000006626,VIL<br>L |
| GO:0008616 | 0.029611281 | 1 | 7   | queuosine biosynthetic process                               | TXNDC9                            |
| GO:0046116 | 0.029611281 | 1 | 7   | queuosine metabolic process                                  | TXNDC9                            |
| GO:0035435 | 0.029691078 | 1 | 5   | phosphate ion transmembrane transport                        | SLC37A2                           |
| GO:0051660 | 0.0302713   | 1 | 5   | establishment of centrosome localization                     | CEP83                             |
| GO:0043124 | 0.030639563 | 2 | 47  | negative regulation of I-kappaB kinase/NF-kappaB signaling   | NLRX1,ENSACAG000000025660         |
| GO:0070813 | 0.030736899 | 1 | 6   | hydrogen sulfide metabolic process                           | ENSACAG00000003722                |
| GO:0033540 | 0.031318546 | 1 | 5   | fatty acid beta-oxidation using acyl-CoA oxidase             | ACOX1                             |
| GO:0072102 | 0.031577265 | 1 | 6   | glomerulus morphogenesis                                     | CTNND1                            |
| GO:1900086 | 0.032262373 | 1 | 6   | positive regulation of peptidyl-tyrosine autophosphorylation | CTNND1                            |
| GO:0006575 | 0.033112859 | 3 | 143 | cellular modified amino acid metabolic process               | KMO,LPCAT3,CRTAP                  |
| GO:0098535 | 0.033344676 | 1 | 5   | de novo centriole assembly                                   | CCDC78                            |
| GO:0040015 | 0.033959717 | 1 | 7   | negative regulation of multicellular organism growth         | LGMN                              |
| GO:1903044 | 0.03484943  | 1 | 6   | protein localization to membrane raft                        | FLOT2                             |
| GO:0046874 | 0.03613453  | 1 | 7   | quinolinate metabolic process                                | KMO                               |
| GO:0038180 | 0.036564244 | 1 | 7   | nerve growth factor signaling pathway                        | RAPGEF1                           |
| GO:0001765 | 0.03753899  | 1 | 10  | membrane raft assembly                                       | FLOT2                             |
| GO:0022406 | 0.038472967 | 2 | 65  | membrane docking                                             | CEP83,STXBP2                      |
| GO:0000002 | 0.038794642 | 1 | 8   | mitochondrial genome maintenance                             | MGME1                             |
| GO:0032486 | 0.03977477  | 1 | 9   | Rap protein signal transduction                              | RAPGEF1                           |
| GO:0070417 | 0.039831493 | 1 | 7   | cellular response to cold                                    | ENSACAG00000017545                |
| GO:0010996 | 0.041841853 | 1 | 7   | response to auditory stimulus                                | XPC                               |

|            |             |   |    |                                                                                                                  |             |
|------------|-------------|---|----|------------------------------------------------------------------------------------------------------------------|-------------|
| GO:0044550 | 0.042017856 | 1 | 8  | secondary metabolite biosynthetic process                                                                        | KMO         |
| GO:1990440 | 0.042075718 | 1 | 9  | positive regulation of transcription from RNA polymerase II promoter in response to endoplasmic reticulum stress | ATF6B       |
| GO:0001738 | 0.042495455 | 1 | 6  | morphogenesis of a polarized epithelium                                                                          | CTNND1      |
| GO:0010224 | 0.043569017 | 1 | 9  | response to UV-B                                                                                                 | XPC         |
| GO:0009566 | 0.047506821 | 2 | 61 | fertilization                                                                                                    | SPAG1,TDRKH |
| GO:0036230 | 0.047925562 | 1 | 8  | granulocyte activation                                                                                           | STXBP2      |
| GO:0043574 | 0.049703483 | 1 | 10 | peroxisomal transport                                                                                            | LONP2       |

**Table S12. PSGs on identified branch 2 of frog.**

| <b>Ensembl Prot ID</b> | <b>Ensembl Gene ID</b> | <b>Ensembl Trans ID</b> | <b>HNGC Name</b> |
|------------------------|------------------------|-------------------------|------------------|
| ENSACAP00000001895     | ENSACAG00000001926     | ENSACAT00000001941      | TAGLN            |
| ENSACAP00000006222     | ENSACAG00000006266     | ENSACAT00000006360      | EPHA2            |
| ENSACAP000000019091    | ENSACAG000000022477    | ENSACAT000000023955     | MYPOP            |
| ENSACAP00000009478     | ENSACAG00000009584     | ENSACAT00000009675      | AFG3L2           |
| ENSACAP00000009546     | ENSACAG00000009706     | ENSACAT00000009743      | GAS8             |
| ENSACAP00000002283     | ENSACAG00000002280     | ENSACAT00000002343      | TRIT1            |
| ENSACAP000000016408    | ENSACAG000000016668    | ENSACAT000000016733     | HTATIP2          |
| ENSACAP000000011621    | ENSACAG000000011877    | ENSACAT000000011861     | ZFAND6           |
| ENSACAP000000023366    | ENSACAG000000028384    | ENSACAT000000030786     | CAPSL            |
| ENSACAP000000011080    | ENSACAG000000011294    | ENSACAT000000011309     | STRBP            |
| ENSACAP000000010531    | ENSACAG000000010711    | ENSACAT000000010748     | CHMP2A           |
| ENSACAP00000009390     | ENSACAG00000009594     | ENSACAT00000009585      |                  |
| ENSACAP00000008105     | ENSACAG00000008210     | ENSACAT00000008277      | WDR3             |
| ENSACAP00000001055     | ENSACAG00000000623     | ENSACAT00000001084      | CPT1B            |
| ENSACAP000000010465    | ENSACAG000000010661    | ENSACAT000000010681     | SIRT6            |
| ENSACAP000000017554    | ENSACAG000000017828    | ENSACAT000000017900     | HPN              |
| ENSACAP000000017624    | ENSACAG000000017900    | ENSACAT000000017970     | BMP4             |
| ENSACAP00000007838     | ENSACAG00000007923     | ENSACAT00000008004      | RXRA             |



|                    |                    |                    |         |
|--------------------|--------------------|--------------------|---------|
| ENSACAP0000003421  | ENSACAG0000003518  | ENSACAT0000003505  | SNX15   |
| ENSACAP0000001781  | ENSACAG0000001869  | ENSACAT0000001825  |         |
| ENSACAP00000012408 | ENSACAG00000012591 | ENSACAT00000012661 | NFYC    |
| ENSACAP00000008175 | ENSACAG00000008301 | ENSACAT00000008350 | PARP2   |
| ENSACAP00000001874 | ENSACAG00000001886 | ENSACAT00000001920 | KANSL3  |
| ENSACAP00000012140 | ENSACAG00000012220 | ENSACAT00000012385 | COL16A1 |
| ENSACAP00000001322 | ENSACAG00000001073 | ENSACAT00000001355 | HYDIN   |
| ENSACAP00000013010 | ENSACAG00000013244 | ENSACAT00000013269 | AIMP2   |
| ENSACAP00000016793 | ENSACAG00000017061 | ENSACAT00000017124 | SP3     |
| ENSACAP00000003596 | ENSACAG00000003599 | ENSACAT00000003684 | PPP4R1  |
| ENSACAP00000006502 | ENSACAG00000006445 | ENSACAT00000006647 |         |
| ENSACAP00000008790 | ENSACAG00000008878 | ENSACAT00000008978 | TAF2    |
| ENSACAP00000000442 | ENSACAG00000000515 | ENSACAT00000000459 | POLRMT  |
| ENSACAP00000015218 | ENSACAG00000015364 | ENSACAT00000015526 |         |
| ENSACAP00000003146 | ENSACAG00000003229 | ENSACAT00000003227 | CFAP45  |
| ENSACAP00000017421 | ENSACAG00000017693 | ENSACAT00000017763 | RIPK1   |
| ENSACAP00000011853 | ENSACAG00000012105 | ENSACAT00000012097 | FAM180A |
| ENSACAP00000012057 | ENSACAG00000012181 | ENSACAT00000012302 | COL4A6  |
| ENSACAP00000007762 | ENSACAG00000007908 | ENSACAT00000007928 | SENP5   |
| ENSACAP00000005764 | ENSACAG00000005840 | ENSACAT00000005891 | PBX1    |
| ENSACAP00000010921 | ENSACAG00000011074 | ENSACAT00000011149 | EIF3H   |
| ENSACAP00000006379 | ENSACAG00000006527 | ENSACAT00000006522 | PTGFR   |
| ENSACAP00000004258 | ENSACAG00000004362 | ENSACAT00000004357 | PPIF    |
| ENSACAP00000005635 | ENSACAG00000005745 | ENSACAT00000005758 | SCN1B   |
| ENSACAP00000019308 | ENSACAG00000009983 | ENSACAT00000023910 | ABRA    |
| ENSACAP00000015939 | ENSACAG00000015936 | ENSACAT00000016257 | VPS13C  |
| ENSACAP00000022522 | ENSACAG00000028662 | ENSACAT00000029939 | COX19   |
| ENSACAP00000011871 | ENSACAG00000012018 | ENSACAT00000012115 | CA12    |
| ENSACAP00000012414 | ENSACAG00000012657 | ENSACAT00000012667 |         |
| ENSACAP00000007369 | ENSACAG00000007538 | ENSACAT00000007525 | CYHR1   |

|                    |                    |                    |          |
|--------------------|--------------------|--------------------|----------|
| ENSACAP0000004467  | ENSACAG0000004556  | ENSACAT0000004568  | EEF1A1   |
| ENSACAP00000012511 | ENSACAG00000012620 | ENSACAT00000012767 | PLAT     |
| ENSACAP00000012725 | ENSACAG00000012939 | ENSACAT00000012981 | VDAC3    |
| ENSACAP00000014487 | ENSACAG00000014561 | ENSACAT00000014782 |          |
| ENSACAP00000006923 | ENSACAG00000006920 | ENSACAT00000007074 | NEO1     |
| ENSACAP00000015231 | ENSACAG00000015062 | ENSACAT00000015539 | COL3A1   |
| ENSACAP00000000009 | ENSACAG00000000010 | ENSACAT00000000010 | C9orf114 |
| ENSACAP00000012411 | ENSACAG00000012671 | ENSACAT00000012664 | BCAS1    |
| ENSACAP00000008943 | ENSACAG00000009143 | ENSACAT00000009134 | MRPL20   |
| ENSACAP00000019740 | ENSACAG00000004115 | ENSACAT00000023628 | C8orf37  |
| ENSACAP00000011731 | ENSACAG00000011986 | ENSACAT00000011974 |          |
| ENSACAP00000010338 | ENSACAG00000010516 | ENSACAT00000010551 | CALB1    |
| ENSACAP00000014660 | ENSACAG00000014939 | ENSACAT00000014957 | C1QA     |
| ENSACAP00000003548 | ENSACAG00000003615 | ENSACAT00000003636 | RNF126   |
| ENSACAP00000008887 | ENSACAG00000008884 | ENSACAT00000009078 | LIPA     |
| ENSACAP00000004656 | ENSACAG00000004703 | ENSACAT00000004762 |          |
| ENSACAP00000004437 | ENSACAG00000004560 | ENSACAT00000004537 | IQCD     |
| ENSACAP00000004932 | ENSACAG00000005037 | ENSACAT00000005045 | LHX5     |
| ENSACAP00000013115 | ENSACAG00000013361 | ENSACAT00000013375 | PKIA     |
| ENSACAP00000006179 | ENSACAG00000006290 | ENSACAT00000006316 | SCLT1    |
| ENSACAP00000013319 | ENSACAG00000013470 | ENSACAT00000013589 | TNPO3    |
| ENSACAP00000001047 | ENSACAG00000001050 | ENSACAT00000001075 | CTCF     |
| ENSACAP00000016123 | ENSACAG00000016403 | ENSACAT00000016444 | CSPP1    |
| ENSACAP00000009938 | ENSACAG00000010008 | ENSACAT00000010142 | PPP3CB   |
| ENSACAP00000007427 | ENSACAG00000007566 | ENSACAT00000007584 | NUP93    |
| ENSACAP00000008830 | ENSACAG00000008935 | ENSACAT00000009020 | VCL      |
| ENSACAP00000017354 | ENSACAG00000017628 | ENSACAT00000017695 | DNAJC8   |
| ENSACAP00000006308 | ENSACAG00000006461 | ENSACAT00000006448 | NUFIP1   |
| ENSACAP00000006334 | ENSACAG00000006468 | ENSACAT00000006476 | GPALPP1  |
| ENSACAP00000015300 | ENSACAG00000015568 | ENSACAT00000015612 | C7orf26  |

|                    |                    |                    |         |
|--------------------|--------------------|--------------------|---------|
| ENSACAP00000019515 | ENSACAG00000024776 | ENSACAT00000026278 | PSMB9   |
| ENSACAP00000003286 | ENSACAG00000003355 | ENSACAT00000003369 | ZFYVE19 |
| ENSACAP00000016437 | ENSACAG00000016709 | ENSACAT00000016762 | GPATCH3 |
| ENSACAP00000007083 | ENSACAG00000007141 | ENSACAT00000007236 | WDR36   |
| ENSACAP00000006621 | ENSACAG00000006760 | ENSACAT00000006767 | HHATL   |
| ENSACAP00000006629 | ENSACAG00000006787 | ENSACAT00000006775 | CCDC13  |
| ENSACAP00000004628 | ENSACAG00000004762 | ENSACAT00000004734 | SSUH2   |
| ENSACAP00000003647 | ENSACAG00000003431 | ENSACAT00000003736 | TNC     |
| ENSACAP00000002954 | ENSACAG00000002779 | ENSACAT00000003031 | CDH1    |
| ENSACAP00000013656 | ENSACAG00000013912 | ENSACAT00000013937 | CCDC84  |
| ENSACAP00000013311 | ENSACAG00000013530 | ENSACAT00000013580 |         |
| ENSACAP00000003727 | ENSACAG00000003828 | ENSACAT00000003818 | CBLN2   |
| ENSACAP00000001457 | ENSACAG00000001432 | ENSACAT00000001493 | SCGN    |
| ENSACAP00000006083 | ENSACAG00000006142 | ENSACAT00000006219 | PITPNB  |
| ENSACAP00000006513 | ENSACAG00000006580 | ENSACAT00000006658 | NCAPD2  |
| ENSACAP00000011565 | ENSACAG00000011593 | ENSACAT00000011805 | RPN2    |
| ENSACAP00000003909 | ENSACAG00000004037 | ENSACAT00000004001 | LRFN3   |
| ENSACAP00000004136 | ENSACAG00000004137 | ENSACAT00000004235 | STARD13 |
| ENSACAP00000007591 | ENSACAG00000007760 | ENSACAT00000007752 | FGFBP3  |
| ENSACAP00000004162 | ENSACAG00000004280 | ENSACAT00000004261 | KIN     |
| ENSACAP00000007502 | ENSACAG00000007562 | ENSACAT00000007662 | ACVR1   |
| ENSACAP00000002413 | ENSACAG00000002495 | ENSACAT00000002475 | HINFP   |
| ENSACAP00000005274 | ENSACAG00000005411 | ENSACAT00000005391 |         |
| ENSACAP00000014977 | ENSACAG00000015222 | ENSACAT00000015280 | FKBP15  |
| ENSACAP00000022968 | ENSACAG00000029620 | ENSACAT00000030387 | PTN     |
| ENSACAP00000014797 | ENSACAG00000015073 | ENSACAT00000015098 | CD79A   |
| ENSACAP00000005022 | ENSACAG00000005154 | ENSACAT00000005135 | CCDC177 |
| ENSACAP00000005833 | ENSACAG00000005770 | ENSACAT00000005962 | STXBP3  |
| ENSACAP00000000378 | ENSACAG00000000366 | ENSACAT00000000393 | TNFAIP2 |
| ENSACAP00000005552 | ENSACAG00000005665 | ENSACAT00000005674 | FAM102B |

|                    |                    |                    |          |
|--------------------|--------------------|--------------------|----------|
| ENSACAP00000017480 | ENSACAG00000017750 | ENSACAT00000017825 | TKFC     |
| ENSACAP00000017040 | ENSACAG00000017304 | ENSACAT00000017375 | ETNK1    |
| ENSACAP00000016496 | ENSACAG00000016777 | ENSACAT00000016822 |          |
| ENSACAP00000011794 | ENSACAG00000012043 | ENSACAT00000012038 | EFCAB5   |
| ENSACAP00000012746 | ENSACAG00000012993 | ENSACAT00000013002 | METTL11B |
| ENSACAP00000004582 | ENSACAG00000004623 | ENSACAT00000004688 | ATP13A1  |
| ENSACAP00000000034 | ENSACAG00000000035 | ENSACAT00000000035 | SLC6A13  |
| ENSACAP00000012912 | ENSACAG00000013148 | ENSACAT00000013170 | SRA1     |
| ENSACAP00000009392 | ENSACAG00000009603 | ENSACAT00000009587 | CHST2    |
| ENSACAP00000011214 | ENSACAG00000011373 | ENSACAT00000011450 | AGK      |
| ENSACAP00000009221 | ENSACAG00000009397 | ENSACAT00000009414 | FKBP9    |
| ENSACAP00000019934 | ENSACAG00000025074 | ENSACAT00000025296 | TMEM263  |
| ENSACAP00000017267 | ENSACAG00000017546 | ENSACAT00000017607 | C7orf25  |
| ENSACAP00000022783 | ENSACAG00000029652 | ENSACAT00000030201 | PIGX     |
| ENSACAP00000017850 | ENSACAG00000021120 | ENSACAT00000021222 | LRRC8D   |
| ENSACAP00000015971 | ENSACAG00000016250 | ENSACAT00000016290 | PVALB    |
| ENSACAP00000001757 | ENSACAG00000001800 | ENSACAT00000001798 |          |
| ENSACAP00000020588 | ENSACAG00000008144 | ENSACAT00000026899 | EFCAB7   |
| ENSACAP00000007417 | ENSACAG00000007573 | ENSACAT00000007574 | ATF4     |
| ENSACAP00000008386 | ENSACAG00000008484 | ENSACAT00000008567 | SMYD1    |
| ENSACAP00000002239 | ENSACAG00000002353 | ENSACAT00000002299 |          |
| ENSACAP00000003808 | ENSACAG00000003916 | ENSACAT00000003900 | NDUFA6   |
| ENSACAP00000012975 | ENSACAG00000013225 | ENSACAT00000013234 | IKBIP    |
| ENSACAP00000005058 | ENSACAG00000005165 | ENSACAT00000005171 | CFAP43   |
| ENSACAP00000014179 | ENSACAG00000014452 | ENSACAT00000014470 | LIN7A    |
| ENSACAP00000016356 | ENSACAG00000016584 | ENSACAT00000016680 | NSF      |
| ENSACAP00000003040 | ENSACAG00000003026 | ENSACAT00000003118 | MED24    |
| ENSACAP00000001315 | ENSACAG00000000802 | ENSACAT00000001348 | USP15    |
| ENSACAP00000001618 | ENSACAG00000001636 | ENSACAT00000001657 | RPAP3    |
| ENSACAP00000016350 | ENSACAG00000016606 | ENSACAT00000016674 | STK38    |

|                     |                     |                     |         |
|---------------------|---------------------|---------------------|---------|
| ENSACAP00000005181  | ENSACAG00000005084  | ENSACAT00000005298  | COL1A1  |
| ENSACAP000000011662 | ENSACAG000000011895 | ENSACAT000000011902 | THAP7   |
| ENSACAP00000000349  | ENSACAG00000000410  | ENSACAT00000000363  | SOD3    |
| ENSACAP00000001158  | ENSACAG00000001047  | ENSACAT00000001191  | ADGRA3  |
| ENSACAP00000005126  | ENSACAG00000005107  | ENSACAT00000005242  | KDM5B   |
| ENSACAP000000010489 | ENSACAG000000010668 | ENSACAT000000010705 |         |
| ENSACAP000000015442 | ENSACAG000000015718 | ENSACAT000000015756 | PHF21B  |
| ENSACAP000000016767 | ENSACAG000000017034 | ENSACAT000000017098 |         |
| ENSACAP000000016151 | ENSACAG000000016342 | ENSACAT000000016472 | SEMA3D  |
| ENSACAP000000014191 | ENSACAG000000014415 | ENSACAT000000014482 | ATP6AP2 |
| ENSACAP00000006211  | ENSACAG00000006358  | ENSACAT00000006349  | FAM185A |
| ENSACAP00000005291  | ENSACAG00000005213  | ENSACAT00000005408  | COL9A3  |
| ENSACAP000000014901 | ENSACAG000000015121 | ENSACAT000000015204 | SLC26A4 |
| ENSACAP000000013595 | ENSACAG000000013842 | ENSACAT000000013875 | BCL9    |
| ENSACAP00000005737  | ENSACAG00000005859  | ENSACAT00000005862  | SPATA4  |
| ENSACAP000000011523 | ENSACAG000000011687 | ENSACAT000000011763 | ABI3BP  |
| ENSACAP000000014676 | ENSACAG000000014952 | ENSACAT000000014973 | GAP43   |
| ENSACAP000000010797 | ENSACAG000000010946 | ENSACAT000000011020 | CWF19L2 |
| ENSACAP000000011904 | ENSACAG000000012117 | ENSACAT000000012148 | NDST4   |
| ENSACAP00000001885  | ENSACAG00000001917  | ENSACAT00000001931  | SYTL2   |
| ENSACAP000000021261 | ENSACAG000000027099 | ENSACAT000000022125 | CCDC89  |
| ENSACAP000000013273 | ENSACAG000000013389 | ENSACAT000000013540 | ADAMTS3 |
| ENSACAP000000010681 | ENSACAG000000010867 | ENSACAT000000010902 | PAIP1   |
| ENSACAP00000008759  | ENSACAG00000008952  | ENSACAT00000008947  | FAM169A |
| ENSACAP00000009090  | ENSACAG00000009297  | ENSACAT00000009283  | ENC1    |
| ENSACAP000000017518 | ENSACAG000000017794 | ENSACAT000000017863 | ZDHHC21 |
| ENSACAP00000004589  | ENSACAG00000004710  | ENSACAT00000004695  |         |
| ENSACAP00000005729  | ENSACAG00000005869  | ENSACAT00000005854  | CCDC115 |
| ENSACAP00000006472  | ENSACAG00000006406  | ENSACAT00000006617  | GRM6    |
| ENSACAP000000017196 | ENSACAG000000017454 | ENSACAT000000017533 | SEL1L   |

|                    |                    |                    |         |
|--------------------|--------------------|--------------------|---------|
| ENSACAP00000015658 | ENSACAG00000015894 | ENSACAT00000015973 | PNN     |
| ENSACAP00000017274 | ENSACAG00000017477 | ENSACAT00000017614 |         |
| ENSACAP00000015816 | ENSACAG00000016077 | ENSACAT00000016133 |         |
| ENSACAP00000008189 | ENSACAG00000008280 | ENSACAT00000008365 | SRPK3   |
| ENSACAP00000015556 | ENSACAG00000015816 | ENSACAT00000015870 | TTBK2   |
| ENSACAP00000011215 | ENSACAG00000011417 | ENSACAT00000011451 | PDZD4   |
| ENSACAP00000009344 | ENSACAG00000009404 | ENSACAT00000009539 | SMC1A   |
| ENSACAP00000012329 | ENSACAG00000012437 | ENSACAT00000012582 | G6PD    |
| ENSACAP00000021152 | ENSACAG00000027094 | ENSACAT00000025138 | APOF    |
| ENSACAP00000000050 | ENSACAG00000000051 | ENSACAT00000000051 | USH1C   |
| ENSACAP00000014885 | ENSACAG00000015119 | ENSACAT00000015187 | NPLOC4  |
| ENSACAP00000002650 | ENSACAG00000002763 | ENSACAT00000002717 | TSSC4   |
| ENSACAP00000016789 | ENSACAG00000017062 | ENSACAT00000017120 |         |
| ENSACAP00000014718 | ENSACAG00000014995 | ENSACAT00000015019 | RASSF7  |
| ENSACAP00000014526 | ENSACAG00000014764 | ENSACAT00000014821 | CHKA    |
| ENSACAP00000017197 | ENSACAG00000017472 | ENSACAT00000017534 | IFITM5  |
| ENSACAP00000001930 | ENSACAG00000001798 | ENSACAT00000001976 | CCDC93  |
| ENSACAP00000001501 | ENSACAG00000001486 | ENSACAT00000001537 | TMBIM1  |
| ENSACAP00000008138 | ENSACAG00000008270 | ENSACAT00000008310 | SPHK1   |
| ENSACAP00000003843 | ENSACAG00000003940 | ENSACAT00000003935 | GSTP1   |
| ENSACAP00000009803 | ENSACAG00000009982 | ENSACAT00000010003 |         |
| ENSACAP00000008060 | ENSACAG00000008231 | ENSACAT00000008232 | CARNS1  |
| ENSACAP00000020914 | ENSACAG00000013938 | ENSACAT00000023342 | SPEG    |
| ENSACAP00000001445 | ENSACAG00000001396 | ENSACAT00000001480 | ABCC3   |
| ENSACAP00000012758 | ENSACAG00000012986 | ENSACAT00000013014 | ZFAND2B |
| ENSACAP00000012577 | ENSACAG00000012718 | ENSACAT00000012833 | CYP27A1 |
| ENSACAP00000016779 | ENSACAG00000017036 | ENSACAT00000017110 | NIF3L1  |
| ENSACAP00000010279 | ENSACAG00000010432 | ENSACAT00000010491 |         |
| ENSACAP00000009915 | ENSACAG00000010121 | ENSACAT00000010118 | CCDC69  |
| ENSACAP00000004825 | ENSACAG00000004851 | ENSACAT00000004933 | PTK7    |

|                    |                    |                    |          |
|--------------------|--------------------|--------------------|----------|
| ENSACAP00000013732 | ENSACAG00000013981 | ENSACAT00000014013 | RCBTB1   |
| ENSACAP00000008288 | ENSACAG00000008460 | ENSACAT00000008467 | MON1A    |
| ENSACAP00000022226 | ENSACAG00000028931 | ENSACAT00000029643 | HEMK1    |
| ENSACAP00000006616 | ENSACAG00000006743 | ENSACAT00000006762 | ALAS1    |
| ENSACAP00000005783 | ENSACAG00000005867 | ENSACAT00000005911 | TRAPPC12 |
| ENSACAP00000013711 | ENSACAG00000013979 | ENSACAT00000013992 |          |
| ENSACAP00000011325 | ENSACAG00000011571 | ENSACAT00000011563 | MGAT1    |
| ENSACAP00000004644 | ENSACAG00000004653 | ENSACAT00000004750 | EZR      |
| ENSACAP00000011800 | ENSACAG00000011746 | ENSACAT00000012044 | SKIV2L   |
| ENSACAP00000001376 | ENSACAG00000001463 | ENSACAT00000001409 | GGPS1    |
| ENSACAP00000001426 | ENSACAG00000001523 | ENSACAT00000001461 | PGBD5    |
| ENSACAP00000008168 | ENSACAG00000008250 | ENSACAT00000008343 | HEATR5B  |
| ENSACAP00000002125 | ENSACAG00000002181 | ENSACAT00000002184 | TAF1A    |
| ENSACAP00000011533 | ENSACAG00000011654 | ENSACAT00000011773 | RTN4     |

**Table S13. GO terms associated with PSGs identified on frog branch 2.**

| category   | pvalue      | numDE<br>InCat | Num<br>InCat | term                                                                      | GeneNames            |
|------------|-------------|----------------|--------------|---------------------------------------------------------------------------|----------------------|
| GO:2000347 | 0.001288613 | 2              | 5            | positive regulation of hepatocyte proliferation                           | PTN,HPN              |
| GO:0032532 | 0.001910418 | 2              | 5            | regulation of microvillus length                                          | USH1C,EZR            |
| GO:0032536 | 0.003802747 | 2              | 7            | regulation of cell projection size                                        | USH1C,EZR            |
| GO:0001655 | 0.004739833 | 2              | 10           | urogenital system development                                             | PBX1,ACVR1           |
| GO:0022406 | 0.004744015 | 4              | 65           | membrane docking                                                          | STXBP3,NSF,SYTL2,EZR |
| GO:0051292 | 0.006462651 | 2              | 9            | nuclear pore complex assembly                                             | RTN4,NUP93           |
| GO:0035025 | 0.00701328  | 2              | 10           | positive regulation of Rho protein signal transduction                    | ABRA,COL3A1          |
| GO:0030970 | 0.007135389 | 2              | 12           | retrograde protein transport, ER to cytosol                               | SEL1L,NPLOC4         |
| GO:0019682 | 0.007141923 | 2              | 12           | glyceraldehyde-3-phosphate metabolic process                              | TKFC,G6PD            |
| GO:0003247 | 0.007457984 | 1              | 1            | post-embryonic cardiac muscle cell growth involved in heart morphogenesis | SIRT6                |

|            |             |    |     |                                                                                       |                                                                                             |
|------------|-------------|----|-----|---------------------------------------------------------------------------------------|---------------------------------------------------------------------------------------------|
| GO:0030574 | 0.007613466 | 3  | 32  | collagen catabolic process                                                            | ADAMTS3, COL4A6, COL3A1                                                                     |
| GO:1904389 | 0.007672887 | 1  | 1   | rod bipolar cell differentiation                                                      | PTN                                                                                         |
| GO:1904391 | 0.007672887 | 1  | 1   | response to ciliary neurotrophic factor                                               | PTN                                                                                         |
| GO:1904397 | 0.007672887 | 1  | 1   | negative regulation of neuromuscular junction development                             | PTN                                                                                         |
| GO:0010849 | 0.008076412 | 1  | 1   | regulation of proton-transporting ATPase activity, rotational mechanism               | PPIF                                                                                        |
| GO:0021966 | 0.008321442 | 1  | 1   | corticospinal neuron axon guidance                                                    | SCN1B                                                                                       |
| GO:0006646 | 0.008335098 | 2  | 13  | phosphatidylethanolamine biosynthetic process                                         | ETNK1, CHKA                                                                                 |
| GO:0010939 | 0.009050737 | 2  | 15  | regulation of necrotic cell death                                                     | RIPK1, PPIF                                                                                 |
| GO:0072027 | 0.009067509 | 1  | 1   | connecting tubule development                                                         | CALB1                                                                                       |
| GO:0072286 | 0.009067509 | 1  | 1   | metanephric connecting tubule development                                             | CALB1                                                                                       |
| GO:0071629 | 0.009173001 | 1  | 1   | cytoplasm-associated proteasomal ubiquitin-dependent protein catabolic process        | RNF126                                                                                      |
| GO:0006480 | 0.009584684 | 1  | 1   | N-terminal protein amino acid methylation                                             | METTL11B                                                                                    |
| GO:0033385 | 0.009718092 | 1  | 1   | geranylgeranyl diphosphate metabolic process                                          | GGPS1                                                                                       |
| GO:0033386 | 0.009718092 | 1  | 1   | geranylgeranyl diphosphate biosynthetic process                                       | GGPS1                                                                                       |
| GO:1902044 | 0.010026839 | 1  | 1   | regulation of Fas signaling pathway                                                   | TMBIM1                                                                                      |
| GO:0031344 | 0.010985794 | 12 | 461 | regulation of cell projection organization                                            | PTN, EPHA2, SEMA3D, ENC1, USH1C, EZR, RTN4, ENSACAG00000015364, SCN1B, EEF1A1, VDAC3, WDR36 |
| GO:0046931 | 0.011323945 | 2  | 12  | pore complex assembly                                                                 | RTN4, NUP93                                                                                 |
| GO:0046337 | 0.011579444 | 2  | 15  | phosphatidylethanolamine metabolic process                                            | ETNK1, CHKA                                                                                 |
| GO:0006049 | 0.011794823 | 1  | 1   | UDP-N-acetylglucosamine catabolic process                                             | MGAT1                                                                                       |
| GO:0009227 | 0.011794823 | 1  | 1   | nucleotide-sugar catabolic process                                                    | MGAT1                                                                                       |
| GO:0006580 | 0.01180568  | 1  | 1   | ethanolamine metabolic process                                                        | CHKA                                                                                        |
| GO:1904681 | 0.01180568  | 1  | 1   | response to 3-methylcholanthrene                                                      | CHKA                                                                                        |
| GO:1904526 | 0.012133391 | 1  | 1   | regulation of microtubule binding                                                     | GAS8                                                                                        |
| GO:0072697 | 0.01296464  | 1  | 1   | protein localization to cell cortex                                                   | EZR                                                                                         |
| GO:0061624 | 0.01324911  | 1  | 1   | fructose catabolic process to hydroxyacetone phosphate and glyceraldehyde-3-phosphate | TKFC                                                                                        |



|            |             |   |     |                                                                                                                         |                                              |
|------------|-------------|---|-----|-------------------------------------------------------------------------------------------------------------------------|----------------------------------------------|
| GO:0070926 | 0.01359841  | 1 | 1   | regulation of ATP:ADP antiporter activity                                                                               | RIPK1                                        |
| GO:1905206 | 0.01359841  | 1 | 1   | positive regulation of hydrogen peroxide-induced cell death                                                             | RIPK1                                        |
| GO:0035048 | 0.014051739 | 1 | 1   | splicing factor protein import into nucleus                                                                             | TNPO3                                        |
| GO:1902426 | 0.014060349 | 1 | 1   | negative regulation of mitotic spindle assembly checkpoint                                                              | TRAPPC12                                     |
| GO:0030046 | 0.014353655 | 1 | 1   | parallel actin filament bundle assembly                                                                                 | USH1C                                        |
| GO:0007507 | 0.014595575 | 6 | 162 | heart development                                                                                                       | PTN,SMYD1,RXRA,COL3A1,PPP3CB,ACVR1           |
| GO:0035499 | 0.014674145 | 1 | 1   | carnosine biosynthetic process                                                                                          | CARNS1                                       |
| GO:0006616 | 0.014783691 | 1 | 2   | SRP-dependent cotranslational protein targeting to membrane, translocation                                              | ZFAND2B                                      |
| GO:0044236 | 0.015008189 | 3 | 41  | multicellular organism metabolic process                                                                                | ADAMTS3,COL4A6,COL3A1                        |
| GO:0000245 | 0.01520417  | 2 | 17  | spliceosomal complex assembly                                                                                           | ENSACAG00000017034,SRPK3                     |
| GO:0014908 | 0.016179183 | 1 | 1   | myotube differentiation involved in skeletal muscle regeneration                                                        | BCL9                                         |
| GO:1905090 | 0.016357209 | 1 | 1   | negative regulation of parkin-mediated mitophagy in response to mitochondrial depolarization                            | VPS13C                                       |
| GO:0042692 | 0.016585591 | 4 | 84  | muscle cell differentiation                                                                                             | BCL9,SPEG,RXRA,HINFP                         |
| GO:0006471 | 0.018398717 | 2 | 19  | protein ADP-ribosylation                                                                                                | SIRT6,PARP2                                  |
| GO:0048278 | 0.018622884 | 3 | 54  | vesicle docking                                                                                                         | STXBP3,NSF,SYTL2                             |
| GO:0035338 | 0.018936417 | 2 | 19  | long-chain fatty-acyl-CoA biosynthetic process                                                                          | AGK,ENSACAG00000016077                       |
| GO:0034769 | 0.019947235 | 1 | 2   | basement membrane disassembly                                                                                           | HPN                                          |
| GO:0003241 | 0.020041691 | 1 | 2   | growth involved in heart morphogenesis                                                                                  | SIRT6                                        |
| GO:0045041 | 0.020313563 | 1 | 2   | protein import into mitochondrial intermembrane space<br>cerebellar Purkinje cell-granule cell precursor cell signaling | AFG3L2                                       |
| GO:0021937 | 0.020497908 | 1 | 2   | involved in regulation of granule cell precursor cell proliferation                                                     | LHX5                                         |
| GO:0061245 | 0.021493638 | 2 | 22  | establishment or maintenance of bipolar cell polarity                                                                   | LIN7A,EZR                                    |
| GO:0048729 | 0.021593983 | 8 | 292 | tissue morphogenesis                                                                                                    | EPHA2,PTK7,BMP4,RXRA,PBX1,COL3A1,VCL,STARD13 |
| GO:0034629 | 0.022654156 | 2 | 22  | cellular protein complex localization                                                                                   | TNFAIP2,EZR                                  |
| GO:1905342 | 0.022772293 | 1 | 2   | positive regulation of protein localization to kinetochore                                                              | TRAPPC12                                     |

|            |             |   |    |                                                                                                                         |                  |
|------------|-------------|---|----|-------------------------------------------------------------------------------------------------------------------------|------------------|
| GO:0071729 | 0.023071259 | 1 | 2  | beak morphogenesis                                                                                                      | BMP4             |
| GO:2000870 | 0.023071259 | 1 | 2  | regulation of progesterone secretion                                                                                    | BMP4             |
| GO:0097195 | 0.023088262 | 1 | 2  | pilomotor reflex                                                                                                        | HPN              |
| GO:0006447 | 0.023567798 | 1 | 2  | regulation of translational initiation by iron                                                                          | RXRA             |
| GO:0045994 | 0.023567798 | 1 | 2  | positive regulation of translational initiation by iron                                                                 | RXRA             |
| GO:0060978 | 0.023567798 | 1 | 2  | angiogenesis involved in coronary vascular morphogenesis                                                                | RXRA             |
| GO:0033383 | 0.023587067 | 1 | 2  | geranyl diphosphate metabolic process                                                                                   | GGPS1            |
| GO:0033384 | 0.023587067 | 1 | 2  | geranyl diphosphate biosynthetic process                                                                                | GGPS1            |
| GO:0045337 | 0.023587067 | 1 | 2  | farnesyl diphosphate biosynthetic process                                                                               | GGPS1            |
| GO:0045338 | 0.023587067 | 1 | 2  | farnesyl diphosphate metabolic process                                                                                  | GGPS1            |
| GO:1901522 | 0.023757371 | 2 | 19 | positive regulation of transcription from RNA polymerase II promoter involved in cellular response to chemical stimulus | ATF4,RXRA        |
| GO:0006001 | 0.024132656 | 1 | 2  | fructose catabolic process                                                                                              | TKFC             |
| GO:0006997 | 0.024496454 | 3 | 49 | nucleus organization                                                                                                    | SRPK3,RTN4,NUP93 |
| GO:1902966 | 0.02570851  | 1 | 2  | positive regulation of protein localization to early endosome                                                           | EZR              |
| GO:1902896 | 0.026031429 | 1 | 2  | terminal web assembly                                                                                                   | EZR              |
| GO:0070265 | 0.026431056 | 2 | 22 | necrotic cell death                                                                                                     | RIPK1,PIIF       |
| GO:0035063 | 0.027040159 | 1 | 2  | nuclear speck organization                                                                                              | SRPK3            |
| GO:0035616 | 0.028483367 | 1 | 2  | histone H2B conserved C-terminal lysine deubiquitination                                                                | USP15            |
| GO:0001915 | 0.028510054 | 1 | 2  | negative regulation of T cell mediated cytotoxicity                                                                     | PPP3CB           |
| GO:0010573 | 0.028976926 | 1 | 2  | vascular endothelial growth factor production                                                                           | ADAMTS3          |
| GO:2000609 | 0.029525213 | 1 | 3  | regulation of thyroid hormone generation                                                                                | HPN              |
| GO:0031503 | 0.029556648 | 2 | 25 | protein complex localization                                                                                            | TNFAIP2,EZR      |
| GO:1904158 | 0.029677019 | 1 | 2  | axonemal central apparatus assembly                                                                                     | HYDIN            |
| GO:0060414 | 0.029781475 | 1 | 2  | aorta smooth muscle tissue morphogenesis                                                                                | COL3A1           |
| GO:0097498 | 0.029903877 | 1 | 2  | endothelial tube lumen extension                                                                                        | STARD13          |
| GO:0048733 | 0.030355236 | 1 | 3  | sebaceous gland development                                                                                             | ZDHHC21          |
| GO:0071799 | 0.030584077 | 1 | 3  | cellular response to prostaglandin D stimulus                                                                           | PTGFR            |
| GO:1903361 | 0.030597537 | 1 | 4  | protein localization to basolateral plasma membrane                                                                     | LIN7A            |
| GO:0021553 | 0.030644599 | 1 | 2  | olfactory nerve development                                                                                             | RTN4             |

|            |             |   |     |                                                                                                              |                                   |
|------------|-------------|---|-----|--------------------------------------------------------------------------------------------------------------|-----------------------------------|
| GO:0097343 | 0.032556731 | 1 | 3   | rioptosome assembly                                                                                          | RIPK1                             |
| GO:0048392 | 0.033334635 | 1 | 3   | intermediate mesodermal cell differentiation                                                                 | BMP4                              |
| GO:0072198 | 0.033334635 | 1 | 3   | mesenchymal cell proliferation involved in ureter development                                                | BMP4                              |
| GO:1900748 | 0.033992064 | 1 | 3   | positive regulation of vascular endothelial growth factor signaling pathway                                  | ADAMTS3                           |
| GO:0009951 | 0.03434062  | 1 | 3   | polarity specification of dorsal/ventral axis                                                                | BMP4                              |
| GO:2000504 | 0.03444433  | 1 | 3   | positive regulation of blood vessel remodeling                                                               | TMBIM1                            |
| GO:1990737 | 0.035227766 | 1 | 3   | response to manganese-induced endoplasmic reticulum stress                                                   | ATF4                              |
| GO:2000290 | 0.035427647 | 1 | 3   | regulation of myotome development                                                                            | BMP4                              |
| GO:0060528 | 0.035454034 | 1 | 3   | secretory columnar luminal epithelial cell differentiation involved in prostate glandular acinus development | RXRA                              |
| GO:1904373 | 0.035490895 | 1 | 3   | response to kainic acid                                                                                      | PTN                               |
| GO:0035498 | 0.036476279 | 1 | 3   | carosine metabolic process                                                                                   | CARNS1                            |
| GO:0034334 | 0.03664346  | 1 | 3   | adherens junction maintenance                                                                                | RASSF7                            |
| GO:0060221 | 0.036954273 | 1 | 4   | retinal rod cell differentiation                                                                             | PTN                               |
| GO:0090234 | 0.036965269 | 1 | 3   | regulation of kinetochore assembly                                                                           | TRAPPC12                          |
| GO:0001951 | 0.037289698 | 1 | 3   | intestinal D-glucose absorption                                                                              | EZR                               |
| GO:0006887 | 0.038172269 | 5 | 159 | exocytosis                                                                                                   | STXBP3,TNFAIP2,LIN7A,SYTL2,PPP3CB |
| GO:0000959 | 0.039754206 | 2 | 27  | mitochondrial RNA metabolic process                                                                          | POLRMT,TRIT1                      |
| GO:0006284 | 0.039875692 | 2 | 28  | base-excision repair                                                                                         | SIRT6,PARP2                       |
| GO:0043009 | 0.039971864 | 5 | 154 | chordate embryonic development                                                                               | IFITM5,MGAT1,RXRA,ACVR1,HINFP     |
| GO:0097435 | 0.04094732  | 1 | 4   | fibril organization                                                                                          | RIPK1                             |
| GO:1990000 | 0.04094732  | 1 | 4   | amyloid fibril formation                                                                                     | RIPK1                             |
| GO:0031987 | 0.040957699 | 1 | 4   | locomotion involved in locomotory behavior                                                                   | PPP3CB                            |
| GO:0015722 | 0.041099232 | 1 | 3   | canalicular bile acid transport                                                                              | ABCC3                             |
| GO:0090324 | 0.042076181 | 1 | 5   | negative regulation of oxidative phosphorylation                                                             | PPIF                              |
| GO:0010032 | 0.042282515 | 1 | 3   | meiotic chromosome condensation                                                                              | NCAPD2                            |
| GO:0065002 | 0.042653104 | 2 | 34  | intracellular protein transmembrane transport                                                                | ZFAND2B,AFG3L2                    |
| GO:0071806 | 0.042653104 | 2 | 34  | protein transmembrane transport                                                                              | ZFAND2B,AFG3L2                    |

|            |             |   |    |                                                                                  |                        |
|------------|-------------|---|----|----------------------------------------------------------------------------------|------------------------|
| GO:0060438 | 0.042693533 | 1 | 4  | trachea development                                                              | HYDIN                  |
| GO:0018231 | 0.042994475 | 1 | 5  | peptidyl-S-diacylglycerol-L-cysteine biosynthetic process from peptidyl-cysteine | ZDHHC21                |
| GO:0043312 | 0.043750265 | 1 | 4  | neutrophil degranulation                                                         | STXBP3                 |
| GO:0010737 | 0.044532504 | 1 | 4  | protein kinase A signaling                                                       | EZR                    |
| GO:0070257 | 0.046599177 | 1 | 4  | positive regulation of mucus secretion                                           | SYTL2                  |
| GO:1904106 | 0.047377358 | 1 | 4  | protein localization to microvillus                                              | USH1C                  |
| GO:0061032 | 0.047450959 | 1 | 4  | visceral serous pericardium development                                          | RXRA                   |
| GO:0015701 | 0.047494055 | 2 | 28 | bicarbonate transport                                                            | SLC26A4,CA12           |
| GO:0050957 | 0.047559414 | 1 | 4  | equilibrioception                                                                | USH1C                  |
| GO:0019722 | 0.047859286 | 3 | 68 | calcium-mediated signaling                                                       | SPHK1,PTGFR,PPP3CB     |
| GO:0071787 | 0.048380319 | 1 | 4  | endoplasmic reticulum tubular network assembly                                   | RTN4                   |
| GO:0007179 | 0.048802168 | 3 | 67 | transforming growth factor beta receptor signaling pathway                       | USP15,COL3A1,ACVR1     |
| GO:0045651 | 0.049207144 | 1 | 5  | positive regulation of macrophage differentiation                                | RIPK1                  |
| GO:0035337 | 0.049327441 | 2 | 32 | fatty-acyl-CoA metabolic process                                                 | AGK,ENSACAG00000016077 |
| GO:0010756 | 0.049530895 | 1 | 5  | positive regulation of plasminogen activation                                    | HPN                    |
| GO:0048146 | 0.049798573 | 2 | 33 | positive regulation of fibroblast proliferation                                  | SPHK1,SIRT6            |

**Table S14. PSGs identified on branch 6 of lizard.**

| Ensembl Prot ID    | Ensembl Gene ID    | Ensembl Trans ID   | HNGC Name |
|--------------------|--------------------|--------------------|-----------|
| ENSACAP00000004915 | ENSACAG00000004759 | ENSACAT00000005028 |           |
| ENSACAP00000015677 | ENSACAG00000015962 | ENSACAT00000015992 | WDR73     |
| ENSACAP00000011004 | ENSACAG00000011239 | ENSACAT00000011232 | PRSS16    |
| ENSACAP00000006471 | ENSACAG00000006602 | ENSACAT00000006616 | ZNF282    |
| ENSACAP00000012717 | ENSACAG00000012949 | ENSACAT00000012973 | RAC1      |
| ENSACAP00000022809 | ENSACAG00000029432 | ENSACAT00000030227 |           |
| ENSACAP00000003146 | ENSACAG00000003229 | ENSACAT00000003227 | CFAP45    |
| ENSACAP00000007762 | ENSACAG00000007908 | ENSACAT00000007928 | SENP5     |
| ENSACAP00000003356 | ENSACAG00000003438 | ENSACAT00000003439 |           |

|                    |                    |                    |         |
|--------------------|--------------------|--------------------|---------|
| ENSACAP00000013712 | ENSACAG00000013937 | ENSACAT00000013993 |         |
| ENSACAP00000013105 | ENSACAG00000013315 | ENSACAT00000013365 |         |
| ENSACAP00000002838 | ENSACAG00000002945 | ENSACAT00000002908 |         |
| ENSACAP00000017711 | ENSACAG00000017988 | ENSACAT00000018059 | TGS1    |
| ENSACAP00000005090 | ENSACAG00000005142 | ENSACAT00000005205 | VIM     |
| ENSACAP00000019497 | ENSACAG00000026822 | ENSACAT00000025669 |         |
| ENSACAP00000003491 | ENSACAG00000003566 | ENSACAT00000003577 | ANLN    |
| ENSACAP00000016018 | ENSACAG00000016306 | ENSACAT00000016338 | RNF168  |
| ENSACAP00000005556 | ENSACAG00000005666 | ENSACAT00000005678 | IWS1    |
| ENSACAP00000014032 | ENSACAG00000014232 | ENSACAT00000014319 | RBBP5   |
| ENSACAP00000007200 | ENSACAG00000007343 | ENSACAT00000007355 | MRPL45  |
| ENSACAP00000016693 | ENSACAG00000016929 | ENSACAT00000017023 | GUCY1B3 |
| ENSACAP00000003266 | ENSACAG00000003023 | ENSACAT00000003349 | LRBA    |
| ENSACAP00000014655 | ENSACAG00000014864 | ENSACAT00000014952 | EHD4    |
| ENSACAP00000021933 | ENSACAG00000029485 | ENSACAT00000029351 |         |
| ENSACAP00000010337 | ENSACAG00000010381 | ENSACAT00000010550 | KALRN   |
| ENSACAP00000005266 | ENSACAG00000005394 | ENSACAT00000005383 | ZNF346  |
| ENSACAP00000007182 | ENSACAG00000007132 | ENSACAT00000007337 | PBRM1   |
| ENSACAP00000007261 | ENSACAG00000007421 | ENSACAT00000007416 | LCLAT1  |

**Table S15. GO terms associated with PSGs identified on lizard branch 6.**

| category   | pvalue      | numDE<br>InCat | numIn<br>Cat | term                                                  | GeneNames   |
|------------|-------------|----------------|--------------|-------------------------------------------------------|-------------|
| GO:0032707 | 0.001059493 | 1              | 1            | negative regulation of interleukin-23 production      | RAC1        |
| GO:0036352 | 0.001657074 | 1              | 1            | histone H2A-K15 ubiquitination                        | RNF168      |
| GO:2001253 | 0.001709599 | 1              | 1            | regulation of histone H3-K36 trimethylation           | IWS1        |
| GO:0036261 | 0.001720373 | 1              | 1            | 7-methylguanosine cap hypermethylation                | TGS1        |
| GO:0031106 | 0.001749031 | 1              | 1            | septin ring organization                              | ANLN        |
| GO:0032784 | 0.001788216 | 2              | 41           | regulation of DNA-templated transcription, elongation | RNF168,IWS1 |

|            |             |   |    |                                                                |                    |
|------------|-------------|---|----|----------------------------------------------------------------|--------------------|
| GO:0021894 | 0.002088467 | 1 | 2  | cerebral cortex GABAergic interneuron development              | RAC1               |
| GO:0036462 | 0.002227209 | 1 | 2  | TRAIL-activated apoptotic signaling pathway                    | ENSACAG00000029485 |
| GO:0002551 | 0.002614602 | 1 | 2  | mast cell chemotaxis                                           | RAC1               |
| GO:0071167 | 0.003232198 | 1 | 2  | ribonucleoprotein complex import into nucleus                  | TGS1               |
| GO:0032185 | 0.003454107 | 1 | 2  | septin cytoskeleton organization                               | ANLN               |
| GO:0002093 | 0.004477182 | 1 | 3  | auditory receptor cell morphogenesis                           | RAC1               |
| GO:0038060 | 0.004663477 | 1 | 3  | nitric oxide-cGMP-mediated signaling pathway                   | GUCY1B3            |
| GO:0043652 | 0.00484099  | 1 | 4  | engulfment of apoptotic cell                                   | RAC1               |
| GO:0051932 | 0.005518069 | 1 | 4  | synaptic transmission, GABAergic                               | RAC1               |
| GO:0016925 | 0.005934227 | 2 | 68 | protein sumoylation                                            | RNF168,SENP5       |
| GO:0021826 | 0.006030077 | 1 | 5  | substrate-independent telencephalic tangential migration       | RAC1               |
| GO:0090521 | 0.006764349 | 1 | 4  | glomerular visceral epithelial cell migration                  | ANLN               |
| GO:0060263 | 0.010352434 | 1 | 8  | regulation of respiratory burst                                | RAC1               |
| GO:0090239 | 0.011231878 | 1 | 7  | regulation of histone H4 acetylation                           | IWS1               |
| GO:0010793 | 0.013041759 | 1 | 7  | regulation of mRNA export from nucleus                         | IWS1               |
| GO:0006907 | 0.013154576 | 1 | 8  | pinocytosis                                                    | EHD4               |
| GO:0016926 | 0.013212904 | 1 | 8  | protein desumoylation                                          | SENP5              |
| GO:0000103 | 0.014098885 | 1 | 11 | sulfate assimilation                                           | ENSACAG00000013937 |
| GO:0097178 | 0.014291854 | 1 | 11 | ruffle assembly                                                | RAC1               |
| GO:0032785 | 0.014324632 | 1 | 9  | negative regulation of DNA-templated transcription, elongation | RNF168             |
| GO:0007263 | 0.014433395 | 1 | 9  | nitric oxide mediated signal transduction                      | GUCY1B3            |
| GO:0048148 | 0.015370369 | 1 | 9  | behavioral response to cocaine                                 | KALRN              |
| GO:0007096 | 0.015783321 | 1 | 11 | regulation of exit from mitosis                                | ANLN               |
| GO:0021517 | 0.015818125 | 1 | 8  | ventral spinal cord development                                | ENSACAG0000002945  |
| GO:0014041 | 0.015893225 | 1 | 9  | regulation of neuron maturation                                | RAC1               |
| GO:0071732 | 0.016445347 | 1 | 11 | cellular response to nitric oxide                              | GUCY1B3            |
| GO:0006972 | 0.018673388 | 1 | 14 | hyperosmotic response                                          | RAC1               |
| GO:0010592 | 0.018911639 | 1 | 13 | positive regulation of lamellipodium assembly                  | RAC1               |

|            |             |   |     |                                                               |                                      |
|------------|-------------|---|-----|---------------------------------------------------------------|--------------------------------------|
| GO:0071731 | 0.019341701 | 1 | 13  | response to nitric oxide                                      | GUCY1B3                              |
| GO:0045190 | 0.020218081 | 1 | 14  | isotype switching                                             | RNF168                               |
| GO:0051054 | 0.020986533 | 2 | 150 | positive regulation of DNA metabolic process                  | RNF168,RAC1                          |
| GO:0032239 | 0.021265177 | 1 | 11  | regulation of nucleobase-containing compound transport        | IWS1                                 |
| GO:1902170 | 0.021542019 | 1 | 14  | cellular response to reactive nitrogen species                | GUCY1B3                              |
| GO:0045453 | 0.021864454 | 1 | 15  | bone resorption                                               | RAC1                                 |
| GO:0006182 | 0.024411224 | 1 | 16  | cGMP biosynthetic process                                     | GUCY1B3                              |
| GO:0016569 | 0.024794729 | 3 | 371 | chromatin modification                                        | RNF168,RBBP5,PBRM1                   |
| GO:0016024 | 0.025158729 | 1 | 19  | CDP-diacylglycerol biosynthetic process                       | LCLAT1                               |
| GO:0046341 | 0.026241809 | 1 | 20  | CDP-diacylglycerol metabolic process                          | LCLAT1                               |
| GO:0048532 | 0.027087816 | 1 | 17  | anatomical structure arrangement                              | RAC1                                 |
| GO:0051668 | 0.027569319 | 1 | 18  | localization within membrane                                  | RAC1                                 |
| GO:0043414 | 0.028862832 | 2 | 164 | macromolecule methylation                                     | RBBP5,TGS1                           |
| GO:0036260 | 0.029042574 | 1 | 21  | RNA capping                                                   | TGS1                                 |
| GO:0006911 | 0.031160509 | 1 | 23  | phagocytosis, engulfment                                      | RAC1                                 |
| GO:1901890 | 0.032214177 | 1 | 20  | positive regulation of cell junction assembly                 | RAC1                                 |
| GO:0043552 | 0.032800576 | 1 | 21  | positive regulation of phosphatidylinositol 3-kinase activity | RAC1                                 |
| GO:0001662 | 0.033641862 | 1 | 23  | behavioral fear response                                      | KALRN                                |
| GO:0002209 | 0.033641862 | 1 | 23  | behavioral defense response                                   | KALRN                                |
| GO:0032259 | 0.034280504 | 2 | 186 | methylation                                                   | RBBP5,TGS1                           |
| GO:0016601 | 0.034777051 | 1 | 23  | Rac protein signal transduction                               | RAC1                                 |
| GO:0010762 | 0.035302563 | 1 | 25  | regulation of fibroblast migration                            | RAC1                                 |
| GO:0031529 | 0.036901993 | 1 | 26  | ruffle organization                                           | RAC1                                 |
| GO:0032456 | 0.037763918 | 1 | 25  | endocytic recycling                                           | EHD4                                 |
| GO:0036297 | 0.03961406  | 1 | 26  | interstrand cross-link repair                                 | RNF168                               |
| GO:0008202 | 0.039868585 | 2 | 208 | steroid metabolic process                                     | ENSACAG00000013937,ENSACAG0000002945 |
| GO:0030041 | 0.040203781 | 1 | 29  | actin filament polymerization                                 | RAC1                                 |

|            |             |   |     |                                   |                    |
|------------|-------------|---|-----|-----------------------------------|--------------------|
| GO:1904837 | 0.041439198 | 1 | 19  | beta-catenin-TCF complex assembly | RBBP5              |
| GO:0006325 | 0.042379144 | 3 | 476 | chromatin organization            | RNF168,RBBP5,PBRM1 |
| GO:0010324 | 0.043382808 | 1 | 31  | membrane invagination             | RAC1               |
| GO:0016444 | 0.044137047 | 1 | 29  | somatic cell DNA recombination    | RNF168             |

**Table S16. PSGs identified on branch 2 of lizard.**

| <b>Ensembl Prot ID</b> | <b>Ensembl Gene ID</b> | <b>Ensembl Trans ID</b> | <b>HNGC Name</b> |
|------------------------|------------------------|-------------------------|------------------|
| ENSACAP00000002982     | ENSACAG00000003085     | ENSACAT00000003059      | BLOC1S5          |
| ENSACAP00000001637     | ENSACAG00000001708     | ENSACAT00000001676      |                  |
| ENSACAP00000006114     | ENSACAG00000006219     | ENSACAT00000006251      | SLC22A17         |
| ENSACAP00000003601     | ENSACAG00000003709     | ENSACAT00000003689      | FADD             |
| ENSACAP00000009466     | ENSACAG00000009326     | ENSACAT00000009663      | HKDC1            |
| ENSACAP00000016378     | ENSACAG00000016634     | ENSACAT00000016702      | CHMP7            |
| ENSACAP00000009853     | ENSACAG00000010057     | ENSACAT00000010055      | SKA1             |
| ENSACAP00000012480     | ENSACAG00000012728     | ENSACAT00000012736      | C16orf13         |
| ENSACAP00000014425     | ENSACAG00000014718     | ENSACAT00000014720      | KLHL25           |
| ENSACAP00000009907     | ENSACAG00000010107     | ENSACAT00000010110      | BBS10            |
| ENSACAP00000002439     | ENSACAG00000002527     | ENSACAT00000002502      | SYBU             |
| ENSACAP00000002575     | ENSACAG00000002642     | ENSACAT00000002641      | MPHOSPH10        |
| ENSACAP00000012354     | ENSACAG00000012565     | ENSACAT00000012607      | AP3M2            |
| ENSACAP00000023124     | ENSACAG00000028274     | ENSACAT00000030544      | PPP1R1A          |
| ENSACAP00000002938     | ENSACAG00000002808     | ENSACAT00000003014      | AARS             |
| ENSACAP00000008717     | ENSACAG00000008837     | ENSACAT00000008904      | ADK              |
| ENSACAP00000000325     | ENSACAG00000000339     | ENSACAT00000000339      | NPDC1            |
| ENSACAP00000002813     | ENSACAG00000002925     | ENSACAT00000002883      | PPP1R3B          |
| ENSACAP00000000283     | ENSACAG00000000306     | ENSACAT00000000291      | ZNF622           |
| ENSACAP00000004433     | ENSACAG00000004543     | ENSACAT00000004533      | TSTD2            |
| ENSACAP00000005953     | ENSACAG00000005972     | ENSACAT00000006087      | PPP2R2A          |
| ENSACAP00000009165     | ENSACAG00000009328     | ENSACAT00000009358      | PLXDC2           |



|                    |                    |                    |          |
|--------------------|--------------------|--------------------|----------|
| ENSACAP0000001286  | ENSACAG0000001336  | ENSACAT0000001319  | ATF6     |
| ENSACAP00000008748 | ENSACAG00000008908 | ENSACAT00000008936 |          |
| ENSACAP00000019497 | ENSACAG00000026822 | ENSACAT00000025669 |          |
| ENSACAP00000010575 | ENSACAG00000010758 | ENSACAT00000010793 | SLC39A14 |
| ENSACAP00000012089 | ENSACAG00000012271 | ENSACAT00000012334 |          |
| ENSACAP00000000834 | ENSACAG00000000877 | ENSACAT00000000860 | SCRN1    |
| ENSACAP00000004063 | ENSACAG00000004173 | ENSACAT00000004157 | MRPL44   |
| ENSACAP00000023445 | ENSACAG00000029320 | ENSACAT00000030864 |          |
| ENSACAP00000023038 | ENSACAG00000028642 | ENSACAT00000030458 | CCDC24   |
| ENSACAP00000000882 | ENSACAG00000000907 | ENSACAT00000000909 | MICU1    |
| ENSACAP00000022057 | ENSACAG00000029108 | ENSACAT00000029475 | ZYG11A   |
| ENSACAP00000001539 | ENSACAG00000001584 | ENSACAT00000001575 | PRPS2    |
| ENSACAP00000011362 | ENSACAG00000011590 | ENSACAT00000011601 | REPS2    |
| ENSACAP00000011458 | ENSACAG00000011708 | ENSACAT00000011697 | CDKL5    |
| ENSACAP00000015734 | ENSACAG00000015951 | ENSACAT00000016050 | CSE1L    |
| ENSACAP00000014277 | ENSACAG00000014447 | ENSACAT00000014570 | PUS7     |
| ENSACAP00000009396 | ENSACAG00000009601 | ENSACAT00000009591 | SRD5A3   |
| ENSACAP00000014749 | ENSACAG00000014964 | ENSACAT00000015050 | LSAMP    |
| ENSACAP00000003266 | ENSACAG00000003023 | ENSACAT00000003349 | LRBA     |
| ENSACAP00000009875 | ENSACAG00000010017 | ENSACAT00000010078 |          |
| ENSACAP00000008230 | ENSACAG00000008386 | ENSACAT00000008407 |          |
| ENSACAP00000003850 | ENSACAG00000003673 | ENSACAT00000003942 | JAK2     |
| ENSACAP00000015315 | ENSACAG00000015401 | ENSACAT00000015626 | RYR3     |
| ENSACAP00000015303 | ENSACAG00000015436 | ENSACAT00000015615 | DNM2     |
| ENSACAP00000015401 | ENSACAG00000015649 | ENSACAT00000015714 | ZNF106   |
| ENSACAP00000006901 | ENSACAG00000007054 | ENSACAT00000007052 | MED19    |
| ENSACAP00000000953 | ENSACAG00000000804 | ENSACAT00000000981 | DARS     |
| ENSACAP00000015661 | ENSACAG00000015930 | ENSACAT00000015976 | LCP2     |
| ENSACAP00000004986 | ENSACAG00000005027 | ENSACAT00000005099 |          |
| ENSACAP00000013619 | ENSACAG00000013868 | ENSACAT00000013899 | RWDD1    |

|                    |                    |                    |        |
|--------------------|--------------------|--------------------|--------|
| ENSACAP00000011520 | ENSACAG00000011707 | ENSACAT00000011760 | FYN    |
| ENSACAP00000023211 | ENSACAG00000029208 | ENSACAT00000030630 |        |
| ENSACAP00000007136 | ENSACAG00000007254 | ENSACAT00000007291 |        |
| ENSACAP00000015333 | ENSACAG00000015618 | ENSACAT00000015646 | RGS7BP |
| ENSACAP00000002216 | ENSACAG00000002254 | ENSACAT00000002276 | MIA3   |

**Table S17. GO terms associated with PSGs identified on lizard branch 2.**

| category   | pvalue      | numDE<br>InCat | numIn<br>Cat | term                                                                              | GeneNames                                        |
|------------|-------------|----------------|--------------|-----------------------------------------------------------------------------------|--------------------------------------------------|
| GO:0006167 | 0.000106847 | 2              | 6            | AMP biosynthetic process                                                          | PRPS2,ADK                                        |
| GO:0043624 | 0.000428142 | 3              | 49           | cellular protein complex disassembly                                              | MRPL44,ENSACAG00000010017,ENSA<br>CAG00000008908 |
| GO:0070126 | 0.000676067 | 2              | 16           | mitochondrial translational termination                                           | MRPL44,ENSACAG00000008908                        |
| GO:0048490 | 0.000704032 | 2              | 15           | anterograde synaptic vesicle transport                                            | BLOC1S5,AP3M2                                    |
| GO:0046033 | 0.000730478 | 2              | 14           | AMP metabolic process                                                             | PRPS2,ADK                                        |
| GO:0097049 | 0.002190912 | 1              | 1            | motor neuron apoptotic process                                                    | FADD                                             |
| GO:2000454 | 0.002190912 | 1              | 1            | positive regulation of CD8-positive, alpha-beta cytotoxic T cell<br>extravasation | FADD                                             |
| GO:1901253 | 0.002592272 | 1              | 1            | negative regulation of intracellular transport of viral material                  | ENSACAG00000029208                               |
| GO:0016095 | 0.002607642 | 1              | 1            | polyprenol catabolic process                                                      | SRD5A3                                           |
| GO:0006175 | 0.002676538 | 1              | 1            | dATP biosynthetic process                                                         | ADK                                              |
| GO:0015891 | 0.003038912 | 1              | 1            | siderophore transport                                                             | SLC22A17                                         |
| GO:0035406 | 0.004023665 | 1              | 1            | histone-tyrosine phosphorylation                                                  | JAK2                                             |
| GO:0035409 | 0.004023665 | 1              | 1            | histone H3-Y41 phosphorylation                                                    | JAK2                                             |
| GO:0030968 | 0.004197636 | 2              | 32           | endoplasmic reticulum unfolded protein response                                   | AARS,ATF6                                        |
| GO:0036462 | 0.00482546  | 1              | 2            | TRAIL-activated apoptotic signaling pathway                                       | FADD                                             |
| GO:2000452 | 0.004836915 | 1              | 2            | regulation of CD8-positive, alpha-beta cytotoxic T cell<br>extravasation          | FADD                                             |
| GO:2000451 | 0.004854072 | 1              | 2            | positive regulation of CD8-positive, alpha-beta T cell<br>extravasation           | FADD                                             |

|            |             |   |     |                                                                     |                                  |
|------------|-------------|---|-----|---------------------------------------------------------------------|----------------------------------|
| GO:0038083 | 0.005393954 | 2 | 33  | peptidyl-tyrosine autophosphorylation                               | JAK2,FYN                         |
| GO:0007169 | 0.005656095 | 5 | 351 | transmembrane receptor protein tyrosine kinase signaling pathway    | REPS2,JAK2,ZNF106,LCP2,FYN       |
| GO:0034660 | 0.005876161 | 5 | 391 | ncRNA metabolic process                                             | MRPL44,PUS7,DARS,MPHOSPH10,AARS  |
| GO:0006422 | 0.005938821 | 1 | 2   | aspartyl-tRNA aminoacylation                                        | S                                |
| GO:0007260 | 0.006740784 | 1 | 2   | tyrosine phosphorylation of STAT protein                            | DARS                             |
| GO:0006984 | 0.006760038 | 2 | 41  | ER-nucleus signaling pathway                                        | JAK2                             |
| GO:0043588 | 0.006877616 | 2 | 33  | skin development                                                    | AARS,ATF6                        |
| GO:2000449 | 0.007493136 | 1 | 3   | regulation of CD8-positive, alpha-beta T cell extravasation         | RYS3,AARS                        |
| GO:0006046 | 0.007759731 | 1 | 3   | N-acetylglucosamine catabolic process                               | FADD                             |
| GO:0006015 | 0.008175337 | 1 | 3   | 5-phosphoribose 1-diphosphate biosynthetic process                  | ENSACAG00000001708               |
| GO:0046391 | 0.008175337 | 1 | 3   | 5-phosphoribose 1-diphosphate metabolic process                     | PRPS2                            |
| GO:0070235 | 0.008345923 | 1 | 3   | regulation of activation-induced cell death of T cells              | PRPS2                            |
| GO:0006414 | 0.009318349 | 2 | 58  | translational elongation                                            | FADD                             |
| GO:0060546 | 0.01048289  | 1 | 4   | negative regulation of necroptotic process                          | MRPL44,ENSACAG00000008908        |
| GO:0030900 | 0.010482965 | 2 | 44  | forebrain development                                               | FADD                             |
| GO:1901678 | 0.010671965 | 1 | 4   | iron coordination entity transport                                  | ENSACAG00000005027,FYN           |
| GO:0090110 | 0.010841449 | 1 | 3   | cargo loading into COPII-coated vesicle                             | SLC22A17                         |
| GO:0006073 | 0.0110035   | 2 | 52  | cellular glucan metabolic process                                   | MIA3                             |
| GO:0043038 | 0.011709496 | 2 | 52  | amino acid activation                                               | PPP1R1A,PPP1R3B                  |
| GO:0006166 | 0.012413498 | 1 | 5   | purine ribonucleoside salvage                                       | DARS,AARS                        |
| GO:0006112 | 0.012597149 | 2 | 56  | energy reserve metabolic process                                    | ADK                              |
| GO:0060340 | 0.013231552 | 1 | 5   | positive regulation of type I interferon-mediated signaling pathway | PPP1R1A,PPP1R3B                  |
| GO:0045651 | 0.013505881 | 1 | 5   | positive regulation of macrophage differentiation                   | FADD                             |
| GO:0050798 | 0.013623588 | 1 | 4   | activated T cell proliferation                                      | FADD                             |
| GO:0045087 | 0.014153873 | 4 | 316 | innate immune response                                              | FYN                              |
| GO:0006091 | 0.014350153 | 3 | 179 | generation of precursor metabolites and energy                      | FADD,JAK2,FYN,ENSACAG00000029208 |
| GO:0097202 | 0.014614789 | 2 | 64  | activation of cysteine-type endopeptidase activity                  | HKDC1,PPP1R1A,PPP1R3B            |

|            |             |   |     |                                                                           |                                              |
|------------|-------------|---|-----|---------------------------------------------------------------------------|----------------------------------------------|
| GO:0009202 | 0.015420649 | 1 | 5   | deoxyribonucleoside triphosphate biosynthetic process                     | ADK                                          |
| GO:0019262 | 0.015511817 | 1 | 6   | N-acetylneuraminic acid catabolic process                                 | ENSACAG00000001708                           |
| GO:0051561 | 0.016308511 | 1 | 6   | positive regulation of mitochondrial calcium ion concentration            | MICU1                                        |
| GO:0003374 | 0.017212162 | 1 | 5   | dynamitin family protein polymerization involved in mitochondrial fission | DNM2                                         |
| GO:0016093 | 0.017346659 | 1 | 7   | polyprenol metabolic process                                              | SRD5A3                                       |
| GO:0071578 | 0.017566153 | 1 | 6   | zinc ion transmembrane import                                             | SLC39A14                                     |
| GO:0009265 | 0.017769974 | 1 | 7   | 2'-deoxyribonucleotide biosynthetic process                               | ADK                                          |
| GO:0018212 | 0.017804366 | 2 | 61  | peptidyl-tyrosine modification                                            | JAK2,FYN                                     |
| GO:0022411 | 0.018266385 | 3 | 175 | cellular component disassembly                                            | MRPL44,ENSACAG00000010017,ENSACAG00000008908 |
| GO:0008300 | 0.019226425 | 1 | 7   | isoprenoid catabolic process                                              | SRD5A3                                       |
| GO:0009124 | 0.019538532 | 2 | 79  | nucleoside monophosphate biosynthetic process                             | PRPS2,ADK                                    |
| GO:0031638 | 0.019981529 | 2 | 75  | zymogen activation                                                        | FADD,ENSACAG00000005027                      |
| GO:0051131 | 0.020800729 | 1 | 7   | chaperone-mediated protein complex assembly                               | BBS10                                        |
| GO:0050932 | 0.021250597 | 1 | 6   | regulation of pigment cell differentiation                                | BLOC1S5                                      |
| GO:0045576 | 0.021845788 | 1 | 8   | mast cell activation                                                      | LCP2                                         |
| GO:0030422 | 0.021957184 | 1 | 6   | production of siRNA involved in RNA interference                          | MRPL44                                       |
| GO:0046777 | 0.022186481 | 3 | 174 | protein autophosphorylation                                               | CDKL5,JAK2,FYN                               |
| GO:0050966 | 0.023139806 | 1 | 7   | detection of mechanical stimulus involved in sensory perception of pain   | FYN                                          |
| GO:0005976 | 0.024145008 | 2 | 81  | polysaccharide metabolic process                                          | PPP1R1A,PPP1R3B                              |
| GO:1900246 | 0.025137034 | 1 | 6   | positive regulation of RIG-I signaling pathway                            | ENSACAG00000029208                           |
| GO:0055065 | 0.027869372 | 4 | 372 | metal ion homeostasis                                                     | SLC39A14,MICU1,RYR3,SLC22A17                 |
| GO:0045324 | 0.028661983 | 1 | 10  | late endosome to vacuole transport                                        | CHMP7                                        |
| GO:0043065 | 0.028886192 | 4 | 387 | positive regulation of apoptotic process                                  | FADD,ENSACAG00000005027,ZNF622,ATF6          |
| GO:0031468 | 0.029275461 | 1 | 11  | nuclear envelope reassembly                                               | CHMP7                                        |
| GO:0043279 | 0.029438798 | 2 | 88  | response to alkaloid                                                      | RYR3,PPP2R2A                                 |
| GO:0035459 | 0.02969924  | 1 | 8   | cargo loading into vesicle                                                | MIA3                                         |
| GO:0048535 | 0.029900649 | 1 | 11  | lymph node development                                                    | FADD                                         |

|            |             |   |     |                                                                       |                    |
|------------|-------------|---|-----|-----------------------------------------------------------------------|--------------------|
| GO:0010458 | 0.03103426  | 1 | 10  | exit from mitosis                                                     | CHMP7              |
| GO:0008631 | 0.032176207 | 1 | 12  | intrinsic apoptotic signaling pathway in response to oxidative stress | ZNF622             |
| GO:0006054 | 0.032278939 | 1 | 12  | N-acetylneuraminate metabolic process                                 | ENSACAG00000001708 |
| GO:0000920 | 0.03289032  | 1 | 12  | cell separation after cytokinesis                                     | CHMP7              |
| GO:0006851 | 0.034868344 | 1 | 13  | mitochondrial calcium ion transport                                   | MICU1              |
| GO:1903513 | 0.035591085 | 1 | 9   | endoplasmic reticulum to cytosol transport                            | RYR3               |
| GO:1901659 | 0.035921325 | 2 | 112 | glycosyl compound biosynthetic process                                | PRPS2,ADK          |
| GO:0009200 | 0.037459376 | 1 | 14  | deoxyribonucleoside triphosphate metabolic process                    | ADK                |
| GO:0006488 | 0.037506251 | 1 | 14  | dolichol-linked oligosaccharide biosynthetic process                  | SRD5A3             |
| GO:0035024 | 0.038692193 | 1 | 11  | negative regulation of Rho protein signal transduction                | ENSACAG00000005027 |
| GO:0042273 | 0.038883384 | 1 | 15  | ribosomal large subunit biogenesis                                    | ZNF622             |
| GO:0042953 | 0.043753589 | 1 | 9   | lipoprotein transport                                                 | MIA3               |
| GO:0044872 | 0.043753589 | 1 | 9   | lipoprotein localization                                              | MIA3               |
| GO:0035307 | 0.043958378 | 1 | 14  | positive regulation of protein dephosphorylation                      | ENSACAG00000005027 |
| GO:0051895 | 0.044059735 | 1 | 15  | negative regulation of focal adhesion assembly                        | ENSACAG00000005027 |
| GO:0034976 | 0.044119841 | 2 | 112 | response to endoplasmic reticulum stress                              | AARS,ATF6          |
| GO:0001895 | 0.044280591 | 1 | 16  | retina homeostasis                                                    | BBS10              |
| GO:0071313 | 0.0463952   | 1 | 12  | cellular response to caffeine                                         | RYR3               |
| GO:0009451 | 0.046998562 | 2 | 122 | RNA modification                                                      | PUS7,AARS          |
| GO:0001522 | 0.047530739 | 1 | 18  | pseudouridine synthesis                                               | PUS7               |
| GO:0044262 | 0.048978373 | 2 | 120 | cellular carbohydrate metabolic process                               | PPP1R1A,PPP1R3B    |
| GO:0070296 | 0.049715744 | 1 | 12  | sarcoplasmic reticulum calcium ion transport                          | RYR3               |
| GO:0036120 | 0.049950111 | 1 | 16  | cellular response to platelet-derived growth factor stimulus          | FYN                |

**Table S18. PSGs identified on branch 1 of frog.**

| <b>Ensembl Prot ID</b> | <b>Ensembl Gene ID</b> | <b>Ensembl Trans ID</b> | <b>HNGC Name</b> |
|------------------------|------------------------|-------------------------|------------------|
| ENSACAP00000002963     | ENSACAG00000003016     | ENSACAT00000003040      |                  |
| ENSACAP000000020775    | ENSACAG000000026588    | ENSACAT000000022129     |                  |

|                     |                     |                     |         |
|---------------------|---------------------|---------------------|---------|
| ENSACAP00000008201  | ENSACAG00000008368  | ENSACAT00000008377  | TAF10   |
| ENSACAP00000001268  | ENSACAG00000001379  | ENSACAT00000001301  | FICD    |
| ENSACAP00000003231  | ENSACAG00000003255  | ENSACAT00000003314  |         |
| ENSACAP000000012691 | ENSACAG000000012889 | ENSACAT000000012947 |         |
| ENSACAP00000004101  | ENSACAG00000004183  | ENSACAT00000004198  |         |
| ENSACAP000000017277 | ENSACAG000000017542 | ENSACAT000000017617 | FOXK1   |
| ENSACAP00000006715  | ENSACAG00000006792  | ENSACAT00000006861  | PIEZO1  |
| ENSACAP00000002886  | ENSACAG00000002886  | ENSACAT00000002957  |         |
| ENSACAP00000004963  | ENSACAG00000005058  | ENSACAT00000005076  | RPL11   |
| ENSACAP00000004923  | ENSACAG00000005000  | ENSACAT00000005036  | PPT1    |
| ENSACAP000000023346 | ENSACAG00000004885  | ENSACAT000000030766 | BMPR2   |
| ENSACAP000000008316 | ENSACAG000000008437 | ENSACAT000000008496 | NPNT    |
| ENSACAP00000005070  | ENSACAG00000005194  | ENSACAT00000005185  | NOP58   |
| ENSACAP00000004794  | ENSACAG00000004894  | ENSACAT00000004902  | MFSD2A  |
| ENSACAP00000001312  | ENSACAG00000001400  | ENSACAT00000001345  | PCBD2   |
| ENSACAP000000012337 | ENSACAG000000012598 | ENSACAT000000012590 | MAN2C1  |
| ENSACAP000000016408 | ENSACAG000000016668 | ENSACAT000000016733 | HTATIP2 |
| ENSACAP00000004015  | ENSACAG00000004079  | ENSACAT00000004107  | RELB    |
| ENSACAP00000009019  | ENSACAG00000009164  | ENSACAT00000009211  | NADK2   |
| ENSACAP00000005351  | ENSACAG00000005479  | ENSACAT00000005468  | COX4I1  |
| ENSACAP000000016271 | ENSACAG000000016477 | ENSACAT000000016595 | GRIPAP1 |
| ENSACAP000000011892 | ENSACAG000000011740 | ENSACAT000000012136 |         |
| ENSACAP000000008948 | ENSACAG000000009150 | ENSACAT000000009139 | MED29   |
| ENSACAP000000013586 | ENSACAG000000013788 | ENSACAT000000013866 |         |
| ENSACAP000000022553 | ENSACAG000000028479 | ENSACAT000000029970 | IFNAR2  |
| ENSACAP000000000414 | ENSACAG000000000363 | ENSACAT000000000431 | IMPDH1  |
| ENSACAP000000000500 | ENSACAG000000000594 | ENSACAT000000000518 | THEM5   |
| ENSACAP000000000793 | ENSACAG000000000902 | ENSACAT000000000818 | LPAR4   |
| ENSACAP000000016905 | ENSACAG000000017180 | ENSACAT000000017240 | LOXL1   |
| ENSACAP000000019544 | ENSACAG000000025211 | ENSACAT000000023876 | PSMB7   |

|                    |                    |                    |         |
|--------------------|--------------------|--------------------|---------|
| ENSACAP0000000405  | ENSACAG0000000447  | ENSACAT0000000422  | BRCC3   |
| ENSACAP00000016795 | ENSACAG00000017007 | ENSACAT00000017126 | SCAMP2  |
| ENSACAP00000016725 | ENSACAG00000016980 | ENSACAT00000017055 |         |
| ENSACAP00000016867 | ENSACAG00000017134 | ENSACAT00000017202 | DDX6    |
| ENSACAP00000006180 | ENSACAG00000006198 | ENSACAT00000006317 | BTA1F1  |
| ENSACAP00000006928 | ENSACAG00000006934 | ENSACAT00000007079 |         |
| ENSACAP00000002807 | ENSACAG00000002851 | ENSACAT00000002877 | METTL3  |
| ENSACAP00000011104 | ENSACAG00000011339 | ENSACAT00000011334 | RPL15   |
| ENSACAP00000013361 | ENSACAG00000013588 | ENSACAT00000013632 |         |
| ENSACAP00000007585 | ENSACAG00000007221 | ENSACAT00000007746 | COL5A1  |
| ENSACAP00000009399 | ENSACAG00000009349 | ENSACAT00000009594 | ADCY4   |
| ENSACAP00000016430 | ENSACAG00000016688 | ENSACAT00000016755 |         |
| ENSACAP00000002142 | ENSACAG00000001978 | ENSACAT00000002201 | COG4    |
| ENSACAP00000016626 | ENSACAG00000016896 | ENSACAT00000016953 | FIBCD1  |
| ENSACAP00000012225 | ENSACAG00000012412 | ENSACAT00000012475 | TINAGL1 |
| ENSACAP00000010445 | ENSACAG00000010646 | ENSACAT00000010659 | USE1    |
| ENSACAP00000001330 | ENSACAG00000000936 | ENSACAT00000001363 | OCRL    |
| ENSACAP00000001568 | ENSACAG00000001189 | ENSACAT00000001605 | GRIN1   |
| ENSACAP00000015226 | ENSACAG00000015481 | ENSACAT00000015534 | USB1    |
| ENSACAP00000013201 | ENSACAG00000013450 | ENSACAT00000013465 | SMIM12  |
| ENSACAP00000017268 | ENSACAG00000017538 | ENSACAT00000017608 |         |
| ENSACAP00000006749 | ENSACAG00000006776 | ENSACAT00000006895 | FUS     |
| ENSACAP00000013733 | ENSACAG00000013982 | ENSACAT00000014014 | GCA     |
| ENSACAP00000017486 | ENSACAG00000017755 | ENSACAT00000017831 | EIF4G3  |
| ENSACAP00000013440 | ENSACAG00000013675 | ENSACAT00000013715 |         |
| ENSACAP00000012483 | ENSACAG00000012625 | ENSACAT00000012739 | AQP3    |
| ENSACAP00000008343 | ENSACAG00000008519 | ENSACAT00000008524 | FAM131C |
| ENSACAP00000014346 | ENSACAG00000014490 | ENSACAT00000014639 | RPA1    |
| ENSACAP00000007281 | ENSACAG00000007456 | ENSACAT00000007437 | RGS9BP  |
| ENSACAP00000011611 | ENSACAG00000011700 | ENSACAT00000011851 | NDRG1   |

|                    |                    |                    |          |
|--------------------|--------------------|--------------------|----------|
| ENSACAP00000017999 | ENSACAG00000027397 | ENSACAT00000022186 | SART1    |
| ENSACAP00000008073 | ENSACAG00000008238 | ENSACAT00000008245 | ZFHX3    |
| ENSACAP00000010118 | ENSACAG00000010210 | ENSACAT00000010326 | KIAA0196 |
| ENSACAP00000001537 | ENSACAG00000001545 | ENSACAT00000001573 | ZCCHC8   |
| ENSACAP00000009815 | ENSACAG00000010022 | ENSACAT00000010015 | NDUFB9   |
| ENSACAP00000011505 | ENSACAG00000011615 | ENSACAT00000011745 | KIAA1468 |
| ENSACAP00000002400 | ENSACAG00000002429 | ENSACAT00000002461 | ADIPOR1  |
| ENSACAP00000008584 | ENSACAG00000008659 | ENSACAT00000008767 | CABIN1   |
| ENSACAP00000016608 | ENSACAG00000016791 | ENSACAT00000016935 | TBC1D22B |
| ENSACAP00000009201 | ENSACAG00000009364 | ENSACAT00000009394 | FZD6     |
| ENSACAP00000005862 | ENSACAG00000005969 | ENSACAT00000005991 | MLF2     |
| ENSACAP00000001566 | ENSACAG00000001034 | ENSACAT00000001603 |          |
| ENSACAP00000008780 | ENSACAG00000008913 | ENSACAT00000008968 | RRM2B    |
| ENSACAP00000005325 | ENSACAG00000005445 | ENSACAT00000005442 | GMDS     |
| ENSACAP00000011281 | ENSACAG00000011533 | ENSACAT00000011517 | PSMG3    |
| ENSACAP00000011162 | ENSACAG00000011399 | ENSACAT00000011395 | C15orf26 |
| ENSACAP00000005539 | ENSACAG00000005680 | ENSACAT00000005660 | GPER1    |
| ENSACAP00000008480 | ENSACAG00000008679 | ENSACAT00000008662 | RERE     |
| ENSACAP00000004182 | ENSACAG00000004222 | ENSACAT00000004281 | LSG1     |
| ENSACAP00000013023 | ENSACAG00000013171 | ENSACAT00000013282 | CCT3     |
| ENSACAP00000008788 | ENSACAG00000008928 | ENSACAT00000008976 | CALU     |
| ENSACAP00000000009 | ENSACAG00000000010 | ENSACAT00000000010 | C9orf114 |
| ENSACAP00000012411 | ENSACAG00000012671 | ENSACAT00000012664 | BCAS1    |
| ENSACAP00000000890 | ENSACAG00000000794 | ENSACAT00000000917 | DMTN     |
| ENSACAP00000003197 | ENSACAG00000003297 | ENSACAT00000003280 | GUCD1    |
| ENSACAP00000009005 | ENSACAG00000009136 | ENSACAT00000009198 | BRD1     |
| ENSACAP00000005969 | ENSACAG00000006111 | ENSACAT00000006103 | SOX8     |
| ENSACAP00000010338 | ENSACAG00000010516 | ENSACAT00000010551 | CALB1    |
| ENSACAP00000003704 | ENSACAG00000003756 | ENSACAT00000003794 | RPLP0    |
| ENSACAP00000005884 | ENSACAG00000006013 | ENSACAT00000006013 | CLVS1    |



|                    |                    |                    |         |
|--------------------|--------------------|--------------------|---------|
| ENSACAP0000000788  | ENSACAG0000000773  | ENSACAT00000000813 | IL1RAP  |
| ENSACAP00000014578 | ENSACAG00000014729 | ENSACAT00000014873 | SCARB1  |
| ENSACAP00000014383 | ENSACAG00000014658 | ENSACAT00000014676 | EMP2    |
| ENSACAP00000015098 | ENSACAG00000015296 | ENSACAT00000015402 | DDX55   |
| ENSACAP00000009342 | ENSACAG00000009522 | ENSACAT00000009537 | ZSWIM8  |
| ENSACAP00000015272 | ENSACAG00000015441 | ENSACAT00000015581 | SBNO1   |
| ENSACAP00000008830 | ENSACAG00000008935 | ENSACAT00000009020 | VCL     |
| ENSACAP00000007394 | ENSACAG00000007463 | ENSACAT00000007551 | SND1    |
| ENSACAP00000006308 | ENSACAG00000006461 | ENSACAT00000006448 | NUFIP1  |
| ENSACAP00000005642 | ENSACAG00000005783 | ENSACAT00000005765 | NOP56   |
| ENSACAP00000003381 | ENSACAG00000003487 | ENSACAT00000003464 | PVRL1   |
| ENSACAP00000007730 | ENSACAG00000007887 | ENSACAT00000007896 | ABHD3   |
| ENSACAP00000009563 | ENSACAG00000009771 | ENSACAT00000009760 | XIRP1   |
| ENSACAP00000007053 | ENSACAG00000007195 | ENSACAT00000007205 | GPAA1   |
| ENSACAP00000005163 | ENSACAG00000005221 | ENSACAT00000005280 | PLCD1   |
| ENSACAP00000008027 | ENSACAG00000008092 | ENSACAT00000008198 | DLG5    |
| ENSACAP00000004798 | ENSACAG00000004884 | ENSACAT00000004906 | HSPA8   |
| ENSACAP00000014695 | ENSACAG00000014958 | ENSACAT00000014995 | ZMYND19 |
| ENSACAP00000000393 | ENSACAG00000000404 | ENSACAT00000000410 |         |
| ENSACAP00000012178 | ENSACAG00000012396 | ENSACAT00000012426 | NUCKS1  |
| ENSACAP00000006654 | ENSACAG00000006809 | ENSACAT00000006800 | CYP8B1  |
| ENSACAP00000003628 | ENSACAG00000003695 | ENSACAT00000003716 |         |
| ENSACAP00000013808 | ENSACAG00000014010 | ENSACAT00000014090 | SLC37A4 |
| ENSACAP00000013183 | ENSACAG00000013293 | ENSACAT00000013446 | VPS35   |
| ENSACAP00000000846 | ENSACAG00000000923 | ENSACAT00000000872 |         |
| ENSACAP00000004578 | ENSACAG00000004685 | ENSACAT00000004683 |         |
| ENSACAP00000009688 | ENSACAG00000009839 | ENSACAT00000009885 | NFATC3  |
| ENSACAP00000005385 | ENSACAG00000005425 | ENSACAT00000005502 | ATXN2L  |
| ENSACAP00000015970 | ENSACAG00000016254 | ENSACAT00000016289 | FBXO34  |
| ENSACAP00000006839 | ENSACAG00000006788 | ENSACAT00000006989 | ITGB1   |

|                    |                    |                    |         |
|--------------------|--------------------|--------------------|---------|
| ENSACAP00000003860 | ENSACAG00000003962 | ENSACAT00000003952 | RBM24   |
| ENSACAP00000009562 | ENSACAG00000009597 | ENSACAT00000009759 | XRCC5   |
| ENSACAP00000007336 | ENSACAG00000007423 | ENSACAT00000007492 | SVIL    |
| ENSACAP00000017100 | ENSACAG00000017294 | ENSACAT00000017437 | GRIK3   |
| ENSACAP00000007069 | ENSACAG00000007003 | ENSACAT00000007221 | DNM1    |
| ENSACAP00000006603 | ENSACAG00000006763 | ENSACAT00000006749 | COMMD8  |
| ENSACAP00000022713 | ENSACAG00000028448 | ENSACAT00000030131 | OTUD1   |
| ENSACAP00000017694 | ENSACAG00000017971 | ENSACAT00000018042 | RGS20   |
| ENSACAP00000017693 | ENSACAG00000017969 | ENSACAT00000018041 | ATP6V1H |
| ENSACAP00000000854 | ENSACAG00000000821 | ENSACAT00000000880 | LPCAT1  |
| ENSACAP00000007033 | ENSACAG00000007160 | ENSACAT00000007185 | RGS5    |
| ENSACAP00000003827 | ENSACAG00000003867 | ENSACAT00000003919 |         |
| ENSACAP00000007237 | ENSACAG00000007250 | ENSACAT00000007392 | ATP11B  |
| ENSACAP00000015568 | ENSACAG00000015849 | ENSACAT00000015882 | CLDN12  |
| ENSACAP00000015558 | ENSACAG00000015785 | ENSACAT00000015872 | CDK14   |
| ENSACAP00000009285 | ENSACAG00000009472 | ENSACAT00000009478 | UTP6    |
| ENSACAP00000003937 | ENSACAG00000004062 | ENSACAT00000004029 | CLEC3B  |
| ENSACAP00000002866 | ENSACAG00000002729 | ENSACAT00000002937 | FBXO18  |
| ENSACAP00000014494 | ENSACAG00000014695 | ENSACAT00000014789 | RFWD2   |
| ENSACAP00000004411 | ENSACAG00000004517 | ENSACAT00000004511 | MRPL47  |
| ENSACAP00000008624 | ENSACAG00000008771 | ENSACAT00000008807 | CTSK    |
| ENSACAP00000000477 | ENSACAG00000000441 | ENSACAT00000000495 | CIRBP   |
| ENSACAP00000016051 | ENSACAG00000016332 | ENSACAT00000016371 | TMEM143 |
| ENSACAP00000015517 | ENSACAG00000015798 | ENSACAT00000015831 | DNAJC22 |
| ENSACAP00000014686 | ENSACAG00000014919 | ENSACAT00000014984 | ALDOA   |
| ENSACAP00000017455 | ENSACAG00000017727 | ENSACAT00000017797 | PPP1R32 |
| ENSACAP00000016487 | ENSACAG00000016682 | ENSACAT00000016813 | CYTH2   |
| ENSACAP00000016567 | ENSACAG00000016780 | ENSACAT00000016893 | TNNT1   |
| ENSACAP00000013343 | ENSACAG00000013301 | ENSACAT00000013614 | COL1A2  |
| ENSACAP00000012761 | ENSACAG00000013005 | ENSACAT00000013017 | GORAB   |

|                    |                    |                    |          |
|--------------------|--------------------|--------------------|----------|
| ENSACAP00000014423 | ENSACAG00000014705 | ENSACAT00000014718 | DLX6     |
| ENSACAP00000002155 | ENSACAG00000002257 | ENSACAT00000002214 | SERPIND1 |
| ENSACAP00000006658 | ENSACAG00000006806 | ENSACAT00000006804 | RSRC1    |
| ENSACAP00000006622 | ENSACAG00000006780 | ENSACAT00000006768 | PTX3     |
| ENSACAP00000000029 | ENSACAG00000000028 | ENSACAT00000000030 | WNK1     |
| ENSACAP00000013049 | ENSACAG00000013246 | ENSACAT00000013308 | DFNA5    |
| ENSACAP00000007049 | ENSACAG00000007116 | ENSACAT00000007201 | HLTF     |
| ENSACAP00000002209 | ENSACAG00000001756 | ENSACAT00000002269 | ATP2C1   |
| ENSACAP00000016703 | ENSACAG00000016940 | ENSACAT00000017033 | HIPK2    |
| ENSACAP00000005541 | ENSACAG00000005571 | ENSACAT00000005662 | CCDC18   |
| ENSACAP00000005184 | ENSACAG00000005061 | ENSACAT00000005301 | EPHA4    |
| ENSACAP00000007260 | ENSACAG00000007341 | ENSACAT00000007415 | SEPT7    |
| ENSACAP00000015007 | ENSACAG00000015290 | ENSACAT00000015311 | MTERF2   |
| ENSACAP00000016036 | ENSACAG00000016312 | ENSACAT00000016356 | UBXN7    |
| ENSACAP00000016238 | ENSACAG00000016387 | ENSACAT00000016561 | MYH9     |
| ENSACAP00000009531 | ENSACAG00000009662 | ENSACAT00000009728 | RYK      |
| ENSACAP00000015992 | ENSACAG00000016262 | ENSACAT00000016312 | IFT27    |
| ENSACAP00000015428 | ENSACAG00000015666 | ENSACAT00000015741 | SH3BP1   |
| ENSACAP00000007420 | ENSACAG00000007355 | ENSACAT00000007577 | STAG1    |
| ENSACAP00000004157 | ENSACAG00000004193 | ENSACAT00000004256 | CPN1     |
| ENSACAP00000012985 | ENSACAG00000013236 | ENSACAT00000013244 | CFAP57   |
| ENSACAP00000013843 | ENSACAG00000014080 | ENSACAT00000014127 | NTN4     |
| ENSACAP00000012479 | ENSACAG00000012654 | ENSACAT00000012735 | CEP83    |
| ENSACAP00000011995 | ENSACAG00000012203 | ENSACAT00000012240 | FAM171A2 |
| ENSACAP00000014854 | ENSACAG00000015138 | ENSACAT00000015155 | SEPP1    |
| ENSACAP00000014890 | ENSACAG00000015161 | ENSACAT00000015192 | TOE1     |
| ENSACAP00000011061 | ENSACAG00000011252 | ENSACAT00000011290 | C12orf29 |
| ENSACAP00000015276 | ENSACAG00000015495 | ENSACAT00000015585 | EIF2B3   |
| ENSACAP00000017515 | ENSACAG00000017786 | ENSACAT00000017860 | AIFM2    |
| ENSACAP00000016880 | ENSACAG00000017140 | ENSACAT00000017215 | FKBP10   |

|                    |                    |                    |          |
|--------------------|--------------------|--------------------|----------|
| ENSACAP00000008015 | ENSACAG00000008185 | ENSACAT00000008186 | CC2D1B   |
| ENSACAP00000007491 | ENSACAG00000007467 | ENSACAT00000007648 |          |
| ENSACAP00000007428 | ENSACAG00000007599 | ENSACAT00000007585 | PPP1R15B |
| ENSACAP00000017662 | ENSACAG00000017936 | ENSACAT00000018008 | ATP6V0A1 |
| ENSACAP00000000334 | ENSACAG00000000380 | ENSACAT00000000348 | OLFM4    |
| ENSACAP00000007271 | ENSACAG00000007418 | ENSACAT00000007427 | SOCS7    |
| ENSACAP00000000706 | ENSACAG00000000649 | ENSACAT00000000730 | DIS3     |
| ENSACAP00000004505 | ENSACAG00000004618 | ENSACAT00000004608 | LSM12    |
| ENSACAP00000002485 | ENSACAG00000002592 | ENSACAT00000002549 | ARGLU1   |
| ENSACAP00000001690 | ENSACAG00000001572 | ENSACAT00000001730 | PLXNB2   |
| ENSACAP00000001397 | ENSACAG00000001494 | ENSACAT00000001430 | ZNF800   |
| ENSACAP00000020514 | ENSACAG00000024935 | ENSACAT00000027223 | F7       |
| ENSACAP00000013323 | ENSACAG00000013405 | ENSACAT00000013593 | AP2A1    |
| ENSACAP00000001974 | ENSACAG00000002034 | ENSACAT00000002022 | CCDC138  |
| ENSACAP00000000629 | ENSACAG00000000412 | ENSACAT00000000649 | DHX15    |
| ENSACAP00000011725 | ENSACAG00000011909 | ENSACAT00000011967 | RGN      |
| ENSACAP00000006202 | ENSACAG00000006348 | ENSACAT00000006339 | FGL2     |
| ENSACAP00000015991 | ENSACAG00000016236 | ENSACAT00000016311 | CDH4     |
| ENSACAP00000002797 | ENSACAG00000002817 | ENSACAT00000002867 | URB1     |
| ENSACAP00000009262 | ENSACAG00000009451 | ENSACAT00000009455 | MPZL1    |
| ENSACAP00000009198 | ENSACAG00000009329 | ENSACAT00000009391 | DCAF6    |
| ENSACAP00000002067 | ENSACAG00000002110 | ENSACAT00000002121 | UFSP2    |
| ENSACAP00000011610 | ENSACAG00000011843 | ENSACAT00000011850 | SENP7    |
| ENSACAP00000010908 | ENSACAG00000011125 | ENSACAT00000011135 | FILIP1L  |
| ENSACAP00000003608 | ENSACAG00000003612 | ENSACAT00000003696 | NR3C2    |
| ENSACAP00000012569 | ENSACAG00000012684 | ENSACAT00000012825 | SEC24B   |
| ENSACAP00000016161 | ENSACAG00000016447 | ENSACAT00000016482 |          |
| ENSACAP00000008722 | ENSACAG00000008698 | ENSACAT00000008909 | HMGCR    |
| ENSACAP00000009807 | ENSACAG00000010001 | ENSACAT00000010007 | BDP1     |
| ENSACAP00000011156 | ENSACAG00000011195 | ENSACAT00000011388 | VCAN     |

|                    |                    |                    |          |
|--------------------|--------------------|--------------------|----------|
| ENSACAP00000012915 | ENSACAG00000013091 | ENSACAT00000013173 | TTC37    |
| ENSACAP00000017487 | ENSACAG00000017757 | ENSACAT00000017832 | PSIP1    |
| ENSACAP00000005301 | ENSACAG00000005379 | ENSACAT00000005418 | OSTF1    |
| ENSACAP00000002825 | ENSACAG00000002423 | ENSACAT00000002895 | SMARCA2  |
| ENSACAP00000001812 | ENSACAG00000001896 | ENSACAT00000001856 | PSMA6    |
| ENSACAP00000018251 | ENSACAG00000024248 | ENSACAT00000028273 | LETMD1   |
| ENSACAP00000009450 | ENSACAG00000009586 | ENSACAT00000009647 | PPP4R3A  |
| ENSACAP00000015113 | ENSACAG00000015342 | ENSACAT00000015419 |          |
| ENSACAP00000017164 | ENSACAG00000017431 | ENSACAT00000017501 | GTF2A1   |
| ENSACAP00000016915 | ENSACAG00000017170 | ENSACAT00000017250 | POMT2    |
| ENSACAP00000016842 | ENSACAG00000017113 | ENSACAT00000017177 | ANGEL1   |
| ENSACAP00000016904 | ENSACAG00000017166 | ENSACAT00000017239 | FARSA    |
| ENSACAP00000016804 | ENSACAG00000017054 | ENSACAT00000017136 | NFIX     |
| ENSACAP00000015583 | ENSACAG00000015726 | ENSACAT00000015897 | SLC44A2  |
| ENSACAP00000012138 | ENSACAG00000012275 | ENSACAT00000012383 | EEF2     |
| ENSACAP00000012387 | ENSACAG00000012627 | ENSACAT00000012640 | C18orf25 |
| ENSACAP00000017361 | ENSACAG00000017600 | ENSACAT00000017702 | POSTN    |
| ENSACAP00000009994 | ENSACAG00000009800 | ENSACAT00000010200 | FLNA     |
| ENSACAP00000022376 | ENSACAG00000029651 | ENSACAT00000029793 | CKAP5    |
| ENSACAP00000009344 | ENSACAG00000009404 | ENSACAT00000009539 | SMC1A    |
| ENSACAP00000012413 | ENSACAG00000012614 | ENSACAT00000012666 | SEPHS2   |
| ENSACAP00000012565 | ENSACAG00000012772 | ENSACAT00000012821 | ATP6AP1  |
| ENSACAP00000021105 | ENSACAG00000025589 | ENSACAT00000022389 | DDX23    |
| ENSACAP00000008971 | ENSACAG00000009130 | ENSACAT00000009163 | PTGES3   |
| ENSACAP00000000046 | ENSACAG00000000047 | ENSACAT00000000047 | KCNJ11   |
| ENSACAP00000015422 | ENSACAG00000015684 | ENSACAT00000015735 | SLC26A11 |
| ENSACAP00000009489 | ENSACAG00000009700 | ENSACAT00000009686 |          |
| ENSACAP00000016415 | ENSACAG00000016662 | ENSACAT00000016740 | PGS1     |
| ENSACAP00000017329 | ENSACAG00000017595 | ENSACAT00000017669 | TEKT3    |
| ENSACAP00000006856 | ENSACAG00000006926 | ENSACAT00000007006 | CTNND1   |

|                    |                    |                    |         |
|--------------------|--------------------|--------------------|---------|
| ENSACAP0000007102  | ENSACAG0000007213  | ENSACAT0000007255  | SLC43A1 |
| ENSACAP0000005039  | ENSACAG0000005166  | ENSACAT0000005152  | MYCBPAP |
| ENSACAP00000010845 | ENSACAG00000010914 | ENSACAT00000011070 | MAP2    |
| ENSACAP00000015631 | ENSACAG00000015637 | ENSACAT00000015946 | FN1     |
| ENSACAP00000013512 | ENSACAG00000013668 | ENSACAT00000013790 | NR3C1   |
| ENSACAP00000015745 | ENSACAG00000016013 | ENSACAT00000016061 | TYW5    |
| ENSACAP00000005755 | ENSACAG00000005717 | ENSACAT00000005882 | GLS     |
| ENSACAP00000005673 | ENSACAG00000005744 | ENSACAT00000005797 | EHBP1   |
| ENSACAP00000014506 | ENSACAG00000014556 | ENSACAT00000014801 | DPYSL3  |
| ENSACAP00000004705 | ENSACAG00000004735 | ENSACAT00000004812 | COL6A1  |
| ENSACAP00000004412 | ENSACAG00000004231 | ENSACAT00000004512 | COL6A3  |
| ENSACAP00000016181 | ENSACAG00000016379 | ENSACAT00000016502 | RUFY1   |
| ENSACAP00000004544 | ENSACAG00000004636 | ENSACAT00000004649 | TTBK1   |
| ENSACAP00000005421 | ENSACAG00000005410 | ENSACAT00000005539 | FGFR4   |
| ENSACAP00000006467 | ENSACAG00000006599 | ENSACAT00000006612 | B4GALT7 |
| ENSACAP00000000239 | ENSACAG00000000198 | ENSACAT00000000245 | ROCK2   |
| ENSACAP00000001499 | ENSACAG00000001356 | ENSACAT00000001535 | ADAM17  |
| ENSACAP00000006912 | ENSACAG00000006988 | ENSACAT00000007063 | STAB1   |
| ENSACAP00000008355 | ENSACAG00000008501 | ENSACAT00000008536 | ELOVL5  |
| ENSACAP00000007242 | ENSACAG00000007357 | ENSACAT00000007397 | GNL3    |
| ENSACAP00000008014 | ENSACAG00000007955 | ENSACAT00000008185 | ITIH4   |
| ENSACAP00000012886 | ENSACAG00000013126 | ENSACAT00000013144 | RAB43   |
| ENSACAP00000010793 | ENSACAG00000010885 | ENSACAT00000011016 | TKT     |
| ENSACAP00000008329 | ENSACAG00000008491 | ENSACAT00000008510 | B3GAT2  |
| ENSACAP00000013979 | ENSACAG00000014247 | ENSACAT00000014265 | AZI2    |
| ENSACAP00000015105 | ENSACAG00000015388 | ENSACAT00000015409 | LMOD3   |
| ENSACAP00000009930 | ENSACAG00000010035 | ENSACAT00000010134 | BRPF1   |
| ENSACAP00000010433 | ENSACAG00000010517 | ENSACAT00000010647 | ABCF1   |
| ENSACAP00000004516 | ENSACAG00000004605 | ENSACAT00000004620 |         |
| ENSACAP00000011394 | ENSACAG00000011208 | ENSACAT00000011633 |         |

|                    |                    |                    |        |
|--------------------|--------------------|--------------------|--------|
| ENSACAP00000003593 | ENSACAG00000003646 | ENSACAT00000003681 | FMN2   |
| ENSACAP00000002410 | ENSACAG00000002405 | ENSACAT00000002472 | GNPAT  |
| ENSACAP00000002456 | ENSACAG00000002531 | ENSACAT00000002519 | PDCD2  |
| ENSACAP00000002674 | ENSACAG00000002782 | ENSACAT00000002741 | ERMARD |
| ENSACAP00000002993 | ENSACAG00000002861 | ENSACAT00000003070 | THBS2  |
| ENSACAP00000009442 | ENSACAG00000009630 | ENSACAT00000009639 | TJAP1  |

**Table S19. GO terms associated with PSGs identified on frog branch 1.**

| category   | pvalue      | numDE<br>InCat | numIn<br>Cat | term                                                                              | GeneNames                                                                                     |
|------------|-------------|----------------|--------------|-----------------------------------------------------------------------------------|-----------------------------------------------------------------------------------------------|
| GO:2001046 | 3.76E-05    | 3              | 5            | positive regulation of integrin-mediated signaling pathway                        | FLNA,DMTN,EMP2                                                                                |
| GO:2001044 | 0.000469871 | 3              | 11           | regulation of integrin-mediated signaling pathway                                 | FLNA,DMTN,EMP2                                                                                |
| GO:0032962 | 0.000606203 | 2              | 3            | positive regulation of inositol trisphosphate biosynthetic process                | GPER1,PLCD1                                                                                   |
| GO:0032571 | 0.000816288 | 2              | 3            | response to vitamin K                                                             | F7,POSTN                                                                                      |
| GO:0006412 | 0.000859054 | 9              | 228          | translation                                                                       | MRPL47,RPL11,EIF2B3,ENSACAG00000015342,EEF2,ENSACAG00000009700,ABCF1,RPL15,ENSACAG00000004183 |
| GO:0040038 | 0.001459864 | 2              | 3            | polar body extrusion after meiotic divisions                                      | FMN2,KIAA0196                                                                                 |
| GO:1900078 | 0.001712704 | 3              | 15           | positive regulation of cellular response to insulin stimulus                      | ENSACAG00000002886,ADIPOR1,NUCKS1                                                             |
| GO:0051295 | 0.001731436 | 2              | 3            | establishment of meiotic spindle localization                                     | MYH9,FMN2                                                                                     |
| GO:0043534 | 0.001985744 | 3              | 16           | blood vessel endothelial cell migration                                           | MYH9,SCARB1,EMP2                                                                              |
| GO:0030511 | 0.002140851 | 3              | 18           | positive regulation of transforming growth factor beta receptor signaling pathway | HIPK2,NPNT,ADAM17                                                                             |
| GO:0033206 | 0.002348464 | 2              | 4            | meiotic cytokinesis                                                               | FMN2,KIAA0196                                                                                 |
| GO:0022618 | 0.00247669  | 9              | 199          | ribonucleoprotein complex assembly                                                | CIRBP,RPL11,PSIP1,DDX23,DDX6,SART1,ENSACAG00000004183,NUFIP1,ATXN2L                           |
| GO:0090407 | 0.002551013 | 13             | 377          | organophosphate biosynthetic process                                              | ATP6V0A1,PGS1,NADK2,TKT,GNPAT,IMPDH1,ADCY4,OCRL,RRM2B,GMDS,ABHD3,GP                           |

|            |             |    |     |                                                                            |                                                                                   |
|------------|-------------|----|-----|----------------------------------------------------------------------------|-----------------------------------------------------------------------------------|
| GO:0071826 | 0.003247275 | 9  | 206 | ribonucleoprotein complex subunit organization                             | AA1,LPCAT1<br>CIRBP,RPL11,PSIP1,DDX23,DDX6,SART1,ENSACAG00000004183,NUFIP1,ATXN2L |
| GO:0015748 | 0.003387821 | 5  | 64  | organophosphate ester transport                                            | ATP11B,MFSD2A,ENSACAG00000015342,SCARB1,SLC37A4                                   |
| GO:0044319 | 0.003395663 | 3  | 18  | wound healing, spreading of cells                                          | FLNA,ADAM17,COL5A1                                                                |
| GO:0033627 | 0.003998623 | 3  | 18  | cell adhesion mediated by integrin                                         | NPNT,ADAM17,ITGB1                                                                 |
| GO:0045851 | 0.004463254 | 3  | 28  | pH reduction                                                               | PPT1,ATP6V0A1,ATP6AP1                                                             |
| GO:1900024 | 0.004547265 | 4  | 41  | regulation of substrate adhesion-dependent cell spreading                  | OLFM4,POSTN,FLNA,DMTN                                                             |
| GO:0032287 | 0.004559302 | 2  | 6   | peripheral nervous system myelin maintenance                               | ENSACAG00000002886,NDRG1                                                          |
| GO:0035313 | 0.004572216 | 2  | 6   | wound healing, spreading of epidermal cells                                | ADAM17,COL5A1                                                                     |
| GO:0021942 | 0.004744206 | 2  | 7   | radial glia guided migration of Purkinje cell                              | SOCS7,RERE                                                                        |
| GO:1901998 | 0.006669428 | 3  | 26  | toxin transport                                                            | RAB43,CCT3,DNM1                                                                   |
| GO:1901264 | 0.007788427 | 3  | 31  | carbohydrate derivative transport                                          | MFSD2A,SCARB1,SLC37A4                                                             |
| GO:1901137 | 0.009585572 | 11 | 354 | carbohydrate derivative biosynthetic process                               | BMPR2,ATP6V0A1,TYW5,B4GALT7,TKT,B3GAT2,IMPDH1,ADCY4,RRM2B,GMDS,GPA<br>A1          |
| GO:0034477 | 0.010289475 | 1  | 1   | U6 snRNA 3'-end processing                                                 | USB1                                                                              |
| GO:0031444 | 0.010641053 | 1  | 1   | slow-twitch skeletal muscle fiber contraction                              | TNNT1                                                                             |
| GO:0072027 | 0.010896985 | 1  | 1   | connecting tubule development                                              | CALB1                                                                             |
| GO:0072286 | 0.010896985 | 1  | 1   | metanephric connecting tubule development                                  | CALB1                                                                             |
| GO:0045056 | 0.011243956 | 2  | 11  | transcytosis                                                               | MFSD2A,VPS35                                                                      |
| GO:0035562 | 0.011756416 | 2  | 9   | negative regulation of chromatin binding                                   | FBXO18,BTAF1                                                                      |
| GO:0030264 | 0.012385249 | 1  | 1   | nuclear fragmentation involved in apoptotic nuclear change                 | GPER1                                                                             |
| GO:2000724 | 0.012385249 | 1  | 1   | positive regulation of cardiac vascular smooth muscle cell differentiation | GPER1                                                                             |
| GO:0035585 | 0.013072474 | 1  | 1   | calcium-mediated signaling using extracellular calcium source              | DMTN                                                                              |
| GO:1901731 | 0.013072474 | 1  | 1   | positive regulation of platelet aggregation                                | DMTN                                                                              |
| GO:0032640 | 0.0130884   | 1  | 1   | tumor necrosis factor production                                           | AZI2                                                                              |



|            |             |   |     |                                                                                 |                                                      |
|------------|-------------|---|-----|---------------------------------------------------------------------------------|------------------------------------------------------|
| GO:0015988 | 0.013160262 | 3 | 37  | energy coupled proton transmembrane transport, against electrochemical gradient | ATP6V0A1,ATP6AP1,ATP6V1H                             |
| GO:0015991 | 0.013160262 | 3 | 37  | ATP hydrolysis coupled proton transport                                         | ATP6V0A1,ATP6AP1,ATP6V1H                             |
| GO:0006608 | 0.013617055 | 1 | 1   | snRNP protein import into nucleus                                               | NOP58                                                |
| GO:0033595 | 0.013647369 | 1 | 1   | response to genistein                                                           | F7                                                   |
| GO:0061476 | 0.013647369 | 1 | 1   | response to anticoagulant                                                       | F7                                                   |
| GO:1904400 | 0.013647369 | 1 | 1   | response to Thyroid stimulating hormone                                         | F7                                                   |
| GO:1904612 | 0.013647369 | 1 | 1   | response to 2,3,7,8-tetrachlorodibenzodioxine                                   | F7                                                   |
| GO:0031270 | 0.013812611 | 1 | 1   | pseudopodium retraction                                                         | SEPT7                                                |
| GO:0018117 | 0.01415051  | 1 | 1   | protein adenylation                                                             | FICD                                                 |
| GO:0018175 | 0.01415051  | 1 | 1   | protein nucleotidylation                                                        | FICD                                                 |
| GO:0007249 | 0.014272567 | 3 | 36  | I-kappaB kinase/NF-kappaB signaling                                             | RELB,AZI2,ENSACAG00000003867                         |
| GO:0031579 | 0.014796318 | 2 | 14  | membrane raft organization                                                      | PPT1,EMP2                                            |
| GO:0000212 | 0.014865765 | 2 | 9   | meiotic spindle organization                                                    | MYH9,KIAA0196                                        |
| GO:0006109 | 0.014867589 | 6 | 137 | regulation of carbohydrate metabolic process                                    | ENSACAG00000002886,AP2A1,PPP4R3A,ADIPOR1,GPER1,PLCD1 |
| GO:0000481 | 0.014978143 | 1 | 1   | maturation of 5S rRNA                                                           | SART1                                                |
| GO:0045585 | 0.014978143 | 1 | 1   | positive regulation of cytotoxic T cell differentiation                         | SART1                                                |
| GO:0015920 | 0.015248734 | 1 | 1   | lipopolysaccharide transport                                                    | SCARB1                                               |
| GO:0060696 | 0.015248734 | 1 | 1   | regulation of phospholipid catabolic process                                    | SCARB1                                               |
| GO:1902930 | 0.015298759 | 3 | 34  | regulation of alcohol biosynthetic process                                      | GPER1,PLCD1,LPCAT1                                   |
| GO:0010954 | 0.01539396  | 2 | 15  | positive regulation of protein processing                                       | CLEC3B,CTNND1                                        |
| GO:1990744 | 0.015648023 | 1 | 1   | primary miRNA methylation                                                       | METTL3                                               |
| GO:0036518 | 0.016028837 | 1 | 1   | chemorepulsion of dopaminergic neuron axon                                      | RYK                                                  |
| GO:0030308 | 0.016906835 | 6 | 137 | negative regulation of cell growth                                              | RYK,PPT1,BMP2,SMARCA2,ADIPOR1,FOXK1                  |
| GO:0051764 | 0.01770704  | 2 | 11  | actin crosslink formation                                                       | FLNA,DPYSL3                                          |
| GO:0072044 | 0.017930786 | 2 | 13  | collecting duct development                                                     | CALB1,DLG5                                           |
| GO:0043402 | 0.018364415 | 1 | 1   | glucocorticoid mediated signaling pathway                                       | NR3C1                                                |
| GO:0033025 | 0.019274816 | 1 | 1   | regulation of mast cell apoptotic process                                       | ADAM17                                               |

|            |             |   |     |                                                                                  |                                                     |
|------------|-------------|---|-----|----------------------------------------------------------------------------------|-----------------------------------------------------|
| GO:0045987 | 0.020012869 | 2 | 16  | positive regulation of smooth muscle contraction                                 | NPNT,GPER1                                          |
| GO:1904209 | 0.020265491 | 1 | 1   | positive regulation of chemokine (C-C motif) ligand 2 secretion                  | POSTN                                               |
| GO:1990523 | 0.020265491 | 1 | 1   | bone regeneration                                                                | POSTN                                               |
| GO:0030026 | 0.020622357 | 1 | 1   | cellular manganese ion homeostasis                                               | ATP2C1                                              |
| GO:0032468 | 0.020622357 | 1 | 1   | Golgi calcium ion homeostasis                                                    | ATP2C1                                              |
| GO:0055071 | 0.020622357 | 1 | 1   | manganese ion homeostasis                                                        | ATP2C1                                              |
| GO:0060690 | 0.020687669 | 1 | 1   | epithelial cell differentiation involved in salivary gland development           | CTNND1                                              |
| GO:0008360 | 0.020883865 | 6 | 130 | regulation of cell shape                                                         | SEPT7,MYH9,PLXNB2,FN1,TTBK1,DMTN                    |
| GO:0006954 | 0.021233505 | 9 | 279 | inflammatory response                                                            | PTX3,FN1,RELB,STAB1,ITIH4,ABCF1,GPER1,IL1RAP,NFATC3 |
| GO:0070482 | 0.021706357 | 7 | 190 | response to oxygen levels                                                        | ALDOA,HIPK2,F7,POSTN,ADAM17,FMN2,PLCD1              |
| GO:0010501 | 0.021757271 | 3 | 36  | RNA secondary structure unwinding                                                | DDX23,DDX6,DDX55                                    |
| GO:0071277 | 0.021768614 | 3 | 39  | cellular response to calcium ion                                                 | ENSACAG00000015342,FUS,DMTN                         |
| GO:2001108 | 0.02184223  | 1 | 1   | positive regulation of Rho guanyl-nucleotide exchange factor activity            | EPHA4                                               |
| GO:0031590 | 0.022642723 | 1 | 2   | wybutosine metabolic process                                                     | TYW5                                                |
| GO:0031591 | 0.022642723 | 1 | 2   | wybutosine biosynthetic process                                                  | TYW5                                                |
| GO:0043966 | 0.02299676  | 3 | 35  | histone H3 acetylation                                                           | BRPF1,TAF10,BRD1                                    |
| GO:0051977 | 0.023311183 | 1 | 2   | lysophospholipid transport                                                       | MFSD2A                                              |
| GO:0048254 | 0.023341121 | 1 | 2   | snoRNA localization                                                              | NOP58                                               |
| GO:0010748 | 0.02364092  | 1 | 2   | negative regulation of plasma membrane long-chain fatty acid transport           | ENSACAG00000002886                                  |
| GO:0006741 | 0.023819554 | 1 | 2   | NADP biosynthetic process                                                        | NADK2                                               |
| GO:0042351 | 0.024097332 | 1 | 2   | 'de novo' GDP-L-fucose biosynthetic process                                      | GMDS                                                |
| GO:1903898 | 0.024111357 | 1 | 2   | negative regulation of PERK-mediated unfolded protein response                   | PPP1R15B                                            |
| GO:0034384 | 0.024525735 | 1 | 2   | high-density lipoprotein particle clearance                                      | SCARB1                                              |
| GO:0010641 | 0.024751965 | 1 | 2   | positive regulation of platelet-derived growth factor receptor signaling pathway | F7                                                  |

|            |             |   |    |                                                                                                   |                    |
|------------|-------------|---|----|---------------------------------------------------------------------------------------------------|--------------------|
| GO:1901301 | 0.025031914 | 1 | 1  | regulation of cargo loading into COPII-coated vesicle                                             | SEC24B             |
| GO:0070560 | 0.025477356 | 1 | 2  | protein secretion by platelet                                                                     | DMTN               |
| GO:0097066 | 0.025524225 | 2 | 16 | response to thyroid hormone                                                                       | COL1A2,F7          |
| GO:0035561 | 0.025599428 | 2 | 15 | regulation of chromatin binding                                                                   | FBXO18,BTAF1       |
| GO:0046166 | 0.026874237 | 1 | 2  | glyceraldehyde-3-phosphate biosynthetic process                                                   | TKT                |
| GO:0097274 | 0.026931219 | 1 | 2  | urea homeostasis                                                                                  | ENSACAG00000015342 |
| GO:0045742 | 0.027028995 | 2 | 18 | positive regulation of epidermal growth factor receptor signaling pathway                         | ADAM17,GPER1       |
| GO:0015917 | 0.027262047 | 1 | 1  | aminophospholipid transport                                                                       | ATP11B             |
| GO:0051758 | 0.027761935 | 1 | 1  | homologous chromosome movement towards spindle pole involved in homologous chromosome segregation | FMN2               |
| GO:0097195 | 0.028345821 | 1 | 2  | pilomotor reflex                                                                                  | NPNT               |
| GO:0035234 | 0.028394703 | 1 | 3  | ectopic germ cell programmed cell death                                                           | ENSACAG00000013588 |
| GO:0035338 | 0.028518466 | 2 | 19 | long-chain fatty-acyl-CoA biosynthetic process                                                    | ELOVL5,THEM5       |
| GO:0023035 | 0.029057064 | 1 | 2  | CD40 signaling pathway                                                                            | ENSACAG00000003867 |
| GO:0072602 | 0.029843103 | 1 | 2  | interleukin-4 secretion                                                                           | IL1RAP             |
| GO:0045112 | 0.029897774 | 1 | 1  | integrin biosynthetic process                                                                     | COL5A1             |
| GO:1990379 | 0.029946443 | 1 | 2  | lipid transport across blood brain barrier                                                        | MFSD2A             |
| GO:0097068 | 0.029959964 | 1 | 2  | response to thyroxine                                                                             | F7                 |
| GO:1904871 | 0.03041099  | 1 | 2  | positive regulation of protein localization to Cajal body                                         | CCT3               |
| GO:0045186 | 0.030414158 | 1 | 1  | zonula adherens assembly                                                                          | DLG5               |
| GO:0044565 | 0.03061195  | 1 | 2  | dendritic cell proliferation                                                                      | AZI2               |
| GO:0071470 | 0.030627759 | 2 | 20 | cellular response to osmotic stress                                                               | RELB,XRCC5         |
| GO:0070269 | 0.030967899 | 1 | 2  | pyroptosis                                                                                        | ENSACAG00000013588 |
| GO:0035461 | 0.031072629 | 1 | 2  | vitamin transmembrane transport                                                                   | SCARB1             |
| GO:0001935 | 0.031123148 | 2 | 17 | endothelial cell proliferation                                                                    | BMPR2,SCARB1       |
| GO:2000767 | 0.031207632 | 1 | 2  | positive regulation of cytoplasmic translation                                                    | METTL3             |
| GO:0016476 | 0.031377003 | 1 | 2  | regulation of embryonic cell shape                                                                |                    |
| GO:0010044 | 0.032014542 | 1 | 2  | response to aluminum ion                                                                          | PLCD1              |
| GO:0006543 | 0.032077718 | 1 | 2  | glutamine catabolic process                                                                       | GLS                |

7-Sep

|            |             |    |     |                                                                                                                    |                                                                   |
|------------|-------------|----|-----|--------------------------------------------------------------------------------------------------------------------|-------------------------------------------------------------------|
| GO:0048213 | 0.032107282 | 1  | 2   | Golgi vesicle prefusion complex stabilization                                                                      | COG4                                                              |
| GO:1902893 | 0.032194582 | 2  | 18  | regulation of pri-miRNA transcription from RNA polymerase II promoter                                              | GNL3,NFATC3                                                       |
| GO:0061640 | 0.032305756 | 3  | 38  | cytoskeleton-dependent cytokinesis                                                                                 | SEPT7,FMN2,KIAA0196                                               |
| GO:0060668 | 0.032315277 | 1  | 2   | regulation of branching involved in salivary gland morphogenesis by extracellular matrix-epithelial cell signaling | NTN4                                                              |
| GO:0055094 | 0.032345716 | 2  | 17  | response to lipoprotein particle                                                                                   | ADAM17,ITGB1                                                      |
| GO:1903525 | 0.033108967 | 1  | 2   | regulation of membrane tubulation                                                                                  | ENSACAG00000013675                                                |
| GO:2000104 | 0.033280918 | 2  | 15  | negative regulation of DNA-dependent DNA replication                                                               | FBXO18,SMC1A                                                      |
| GO:0032472 | 0.033347895 | 1  | 2   | Golgi calcium ion transport                                                                                        | ATP2C1                                                            |
| GO:0097028 | 0.033653771 | 2  | 21  | dendritic cell differentiation                                                                                     | RELB,AZI2                                                         |
| GO:0021747 | 0.033954692 | 1  | 2   | cochlear nucleus development                                                                                       | SEC24B                                                            |
| GO:1903015 | 0.034025263 | 1  | 3   | regulation of exo-alpha-sialidase activity                                                                         | PTX3                                                              |
| GO:0001913 | 0.034283887 | 1  | 3   | T cell mediated cytotoxicity                                                                                       | EMP2                                                              |
| GO:0071167 | 0.034331427 | 1  | 2   | ribonucleoprotein complex import into nucleus                                                                      | NOP58                                                             |
| GO:0098602 | 0.034513415 | 10 | 319 | single organism cell adhesion                                                                                      | MYH9,NPNT,FLNA,CTNND1,RELB,ADAM17,AZI2,VCL,PVRL1,DLG5             |
| GO:0010701 | 0.035263999 | 1  | 3   | positive regulation of norepinephrine secretion                                                                    | PLCD1                                                             |
| GO:0055099 | 0.035866364 | 1  | 2   | response to high density lipoprotein particle                                                                      | ADAM17                                                            |
| GO:0007015 | 0.035962945 | 7  | 200 | actin filament organization                                                                                        | FLNA,DPYSL3,LMOD3,FMN2,DMTN,EMP2,ENSACAG00000000923               |
| GO:1904706 | 0.036361608 | 1  | 4   | negative regulation of vascular smooth muscle cell proliferation                                                   | GPER1                                                             |
| GO:0010710 | 0.036649815 | 1  | 2   | regulation of collagen catabolic process                                                                           | ITGB1                                                             |
| GO:0034696 | 0.037277611 | 1  | 3   | response to prostaglandin F                                                                                        | PLCD1                                                             |
| GO:0008610 | 0.037695969 | 11 | 435 | lipid biosynthetic process                                                                                         | HMGCR,PTGES3,PGS1,ELOVL5,TKT,GNPAT,OCRL,SCARB1,ABHD3,GPAA1,LPCAT1 |
| GO:0009108 | 0.038115226 | 4  | 98  | coenzyme biosynthetic process                                                                                      | PCBD2,NADK2,ELOVL5,THEM5                                          |
| GO:0010037 | 0.038200347 | 1  | 2   | response to carbon dioxide                                                                                         | F7                                                                |
| GO:0030578 | 0.039176671 | 1  | 2   | PML body organization                                                                                              | HIPK2                                                             |

|            |             |   |     |                                                                                 |                                  |
|------------|-------------|---|-----|---------------------------------------------------------------------------------|----------------------------------|
| GO:0090382 | 0.039435404 | 1 | 4   | phagosome maturation                                                            | RAB43                            |
| GO:0046368 | 0.039459681 | 1 | 3   | GDP-L-fucose metabolic process                                                  | GMDS                             |
| GO:1903919 | 0.039746457 | 1 | 2   | negative regulation of actin filament severing                                  | MYH9                             |
| GO:0070542 | 0.039827825 | 3 | 49  | response to fatty acid                                                          | GNPAT,PLCD1,XRCC5                |
| GO:0022613 | 0.040070022 | 3 | 54  | ribonucleoprotein complex biogenesis                                            | GNL3,LSG1,RPLP0                  |
| GO:0006953 | 0.040655034 | 2 | 22  | acute-phase response                                                            | FN1,ITIH4                        |
| GO:0023016 | 0.041018197 | 1 | 2   | signal transduction by trans-phosphorylation                                    | WNK1                             |
| GO:0001974 | 0.041549998 | 2 | 19  | blood vessel remodeling                                                         | BMPR2,FLNA                       |
| GO:0044359 | 0.043457407 | 1 | 4   | modulation of molecular function in other organism                              | PTX3                             |
| GO:0006029 | 0.044318875 | 3 | 51  | proteoglycan metabolic process                                                  | BMPR2,B4GALT7,B3GAT2             |
| GO:0032796 | 0.044343174 | 1 | 2   | uropod organization                                                             | MYH9                             |
| GO:1904953 | 0.044402634 | 1 | 2   | Wnt signaling pathway involved in midbrain dopaminergic neuron differentiation  | RYK                              |
| GO:0051262 | 0.044472896 | 4 | 87  | protein tetramerization                                                         | ALDOA,FARSA,GLS,DNM1             |
| GO:0001666 | 0.044693209 | 6 | 177 | response to hypoxia                                                             | ALDOA,HIPK2,F7,POSTN,ADAM17,FMN2 |
| GO:0003252 | 0.044771946 | 1 | 2   | negative regulation of cell proliferation involved in heart valve morphogenesis | BMPR2                            |
| GO:0045906 | 0.044771946 | 1 | 2   | negative regulation of vasoconstriction                                         | BMPR2                            |
| GO:0071873 | 0.044951615 | 1 | 2   | response to norepinephrine                                                      | COL1A2                           |
| GO:0060856 | 0.045242575 | 1 | 3   | establishment of blood-brain barrier                                            | MFSD2A                           |
| GO:0072429 | 0.045335506 | 1 | 3   | response to intra-S DNA damage checkpoint signaling                             | FBXO18                           |
| GO:0006432 | 0.045365613 | 1 | 3   | phenylalanyl-tRNA aminoacylation                                                | FARSA                            |
| GO:1904816 | 0.045624719 | 1 | 3   | positive regulation of protein localization to chromosome, telomeric region     | GNL3                             |
| GO:0016578 | 0.045897499 | 2 | 19  | histone deubiquitination                                                        | BRCC3,TAF10                      |
| GO:0019853 | 0.046439574 | 1 | 4   | L-ascorbic acid biosynthetic process                                            | RGN                              |
| GO:0006123 | 0.046787883 | 1 | 6   | mitochondrial electron transport, cytochrome c to oxygen                        | COX4I1                           |
| GO:2001206 | 0.046900259 | 1 | 4   | positive regulation of osteoclast development                                   | ATP6AP1                          |
| GO:0070537 | 0.047032898 | 1 | 3   | histone H2A K63-linked deubiquitination                                         | BRCC3                            |
| GO:0071918 | 0.047061102 | 1 | 4   | urea transmembrane transport                                                    | AQP3                             |

|            |             |   |     |                                              |                                                          |
|------------|-------------|---|-----|----------------------------------------------|----------------------------------------------------------|
| GO:0021691 | 0.047143182 | 1 | 2   | cerebellar Purkinje cell layer maturation    | RERE                                                     |
| GO:0005996 | 0.047193646 | 5 | 131 | monosaccharide metabolic process             | ENSACAG00000002886,RGN,MAN2C1,ENSACAG00000003255,SLC37A4 |
| GO:1904059 | 0.048146074 | 1 | 2   | regulation of locomotor rhythm               | ZFHX3                                                    |
| GO:0000354 | 0.04831298  | 1 | 2   | cis assembly of pre-catalytic spliceosome    | DDX23                                                    |
| GO:0070508 | 0.048489864 | 1 | 4   | cholesterol import                           | SCARB1                                                   |
| GO:0061357 | 0.048612238 | 1 | 3   | positive regulation of Wnt protein secretion | VPS35                                                    |
| GO:0032543 | 0.048946128 | 2 | 32  | mitochondrial translation                    | MRPL47,ENSACAG00000009700                                |

**Table S20. PSGs identified on branch 1 of lizard.**

| <b>Ensembl Prot ID</b> | <b>Ensembl Gene ID</b> | <b>Ensembl Trans ID</b> | <b>HNGC Name</b> |
|------------------------|------------------------|-------------------------|------------------|
| ENSACAP00000002137     | ENSACAG00000002143     | ENSACAT00000002196      | L3MBTL1          |
| ENSACAP00000015439     | ENSACAG00000015714     | ENSACAT00000015753      | MFI2             |
| ENSACAP00000016336     | ENSACAG00000016618     | ENSACAT00000016660      | PROSER3          |
| ENSACAP00000012717     | ENSACAG00000012949     | ENSACAT00000012973      | RAC1             |
| ENSACAP00000007383     | ENSACAG00000007428     | ENSACAT00000007539      | STX1B            |
| ENSACAP00000015377     | ENSACAG00000015642     | ENSACAT00000015690      | C4orf27          |
| ENSACAP00000008811     | ENSACAG00000009002     | ENSACAT00000009000      | DSCC1            |
| ENSACAP00000017566     | ENSACAG00000017840     | ENSACAT00000017912      | SYTL1            |
| ENSACAP00000007133     | ENSACAG00000007296     | ENSACAT00000007288      | MPZL2            |
| ENSACAP00000005828     | ENSACAG00000005562     | ENSACAT00000005957      | PFKM             |
| ENSACAP00000003300     | ENSACAG00000003345     | ENSACAT00000003383      | EPC2             |
| ENSACAP00000017808     | ENSACAG00000014871     | ENSACAT00000021009      |                  |
| ENSACAP00000014476     | ENSACAG00000014759     | ENSACAT00000014771      | SNCG             |
| ENSACAP00000004419     | ENSACAG00000004481     | ENSACAT00000004519      | MTO1             |
| ENSACAP00000011033     | ENSACAG00000011006     | ENSACAT00000011261      |                  |
| ENSACAP00000003616     | ENSACAG00000003671     | ENSACAT00000003704      | RAD54B           |
| ENSACAP00000012671     | ENSACAG00000012853     | ENSACAT00000012927      | TUBD1            |
| ENSACAP00000010262     | ENSACAG00000010440     | ENSACAT00000010474      | NBN              |

|                    |                    |                    |         |
|--------------------|--------------------|--------------------|---------|
| ENSACAP0000006530  | ENSACAG0000006669  | ENSACAT0000006675  | CEP164  |
| ENSACAP00000011352 | ENSACAG00000011361 | ENSACAT00000011591 | MAPK8   |
| ENSACAP00000001731 | ENSACAG00000001829 | ENSACAT00000001771 | CPLX1   |
| ENSACAP00000014202 | ENSACAG00000014417 | ENSACAT00000014493 | SLC40A1 |
| ENSACAP00000007473 | ENSACAG00000007570 | ENSACAT00000007630 | KIFC3   |
| ENSACAP00000007083 | ENSACAG00000007141 | ENSACAT00000007236 | WDR36   |
| ENSACAP00000013980 | ENSACAG00000014244 | ENSACAT00000014266 | ELK4    |
| ENSACAP00000011565 | ENSACAG00000011593 | ENSACAT00000011805 | RPN2    |
| ENSACAP00000020020 | ENSACAG00000023926 | ENSACAT00000025106 |         |
| ENSACAP00000002341 | ENSACAG00000002418 | ENSACAT00000002401 | FAM98C  |
| ENSACAP00000004433 | ENSACAG00000004543 | ENSACAT00000004533 | TSTD2   |
| ENSACAP00000016972 | ENSACAG00000017247 | ENSACAT00000017307 | CCHCR1  |
| ENSACAP00000015181 | ENSACAG00000015394 | ENSACAT00000015488 | PEX1    |
| ENSACAP00000006087 | ENSACAG00000006163 | ENSACAT00000006224 |         |
| ENSACAP00000017400 | ENSACAG00000017657 | ENSACAT00000017741 |         |
| ENSACAP00000020398 | ENSACAG00000024242 | ENSACAT00000024602 |         |
| ENSACAP00000000025 | ENSACAG00000000026 | ENSACAT00000000026 | RAD52   |
| ENSACAP00000002621 | ENSACAG00000002580 | ENSACAT00000002687 | CAPN7   |
| ENSACAP00000002239 | ENSACAG00000002353 | ENSACAT00000002299 |         |
| ENSACAP00000022859 | ENSACAG00000028815 | ENSACAT00000030277 |         |
| ENSACAP00000016459 | ENSACAG00000016741 | ENSACAT00000016784 | RPRML   |
| ENSACAP00000002072 | ENSACAG00000002150 | ENSACAT00000002126 | NSUN4   |
| ENSACAP00000018329 | ENSACAG00000023921 | ENSACAT00000023397 |         |
| ENSACAP00000017296 | ENSACAG00000017564 | ENSACAT00000017636 | LHPP    |
| ENSACAP00000022870 | ENSACAG00000017206 | ENSACAT00000030288 | FGFR2   |
| ENSACAP00000016763 | ENSACAG00000017032 | ENSACAT00000017093 | BAG3    |
| ENSACAP00000001618 | ENSACAG00000001636 | ENSACAT00000001657 | RPAP3   |
| ENSACAP00000005847 | ENSACAG00000005931 | ENSACAT00000005976 | IRF6    |
| ENSACAP00000011603 | ENSACAG00000011834 | ENSACAT00000011843 | GTPBP6  |
| ENSACAP00000001539 | ENSACAG00000001584 | ENSACAT00000001575 | PRPS2   |

|                    |                    |                    |          |
|--------------------|--------------------|--------------------|----------|
| ENSACAP00000007616 | ENSACAG00000007783 | ENSACAT00000007777 | GTSE1    |
| ENSACAP00000009396 | ENSACAG00000009601 | ENSACAT00000009591 | SRD5A3   |
| ENSACAP00000009059 | ENSACAG00000009242 | ENSACAT00000009252 |          |
| ENSACAP00000008781 | ENSACAG00000008899 | ENSACAT00000008969 |          |
| ENSACAP00000010959 | ENSACAG00000011160 | ENSACAT00000011187 | XRCC4    |
| ENSACAP00000008989 | ENSACAG00000008993 | ENSACAT00000009182 | TRPM3    |
| ENSACAP00000000826 | ENSACAG00000000931 | ENSACAT00000000852 | SMC5     |
| ENSACAP00000003853 | ENSACAG00000003966 | ENSACAT00000003945 | PLGRKT   |
| ENSACAP00000013191 | ENSACAG00000013313 | ENSACAT00000013455 | AGAP2    |
| ENSACAP00000003931 | ENSACAG00000004053 | ENSACAT00000004023 | PPP4R4   |
| ENSACAP00000003757 | ENSACAG00000003860 | ENSACAT00000003849 | ZNF408   |
| ENSACAP00000022884 | ENSACAG00000022875 | ENSACAT00000030302 | TRIM44   |
| ENSACAP00000015058 | ENSACAG00000015300 | ENSACAT00000015362 | SLC38A10 |
| ENSACAP00000016415 | ENSACAG00000016662 | ENSACAT00000016740 | PGS1     |
| ENSACAP00000019694 | ENSACAG00000017681 | ENSACAT00000025897 | MFSD6L   |
| ENSACAP00000001956 | ENSACAG00000001934 | ENSACAT00000002002 | ZRANB3   |
| ENSACAP00000021468 | ENSACAG00000022559 | ENSACAT00000024525 |          |
| ENSACAP00000012005 | ENSACAG00000012175 | ENSACAT00000012250 | FNIP1    |
| ENSACAP00000018017 | ENSACAG00000022125 | ENSACAT00000025587 |          |
| ENSACAP00000005109 | ENSACAG00000005146 | ENSACAT00000005225 | MCM3     |
| ENSACAP00000011380 | ENSACAG00000011645 | ENSACAT00000011619 | C2orf44  |
| ENSACAP00000010301 | ENSACAG00000010498 | ENSACAT00000010513 | COQ3     |
| ENSACAP00000013721 | ENSACAG00000013992 | ENSACAT00000014002 | CHST13   |
| ENSACAP00000010691 | ENSACAG00000010800 | ENSACAT00000010912 | ATAT1    |

**Table S21. GO terms associated with PSGs identified on lizard branch 1.**

| category   | pvalue   | numDE<br>InCat | numIn<br>Cat | term       | GeneNames                          |
|------------|----------|----------------|--------------|------------|------------------------------------|
| GO:0006281 | 4.33E-05 | 9              | 416          | DNA repair | RAD52,ENSACAG00000008899,XRCC4,SMC |



---

|            |             |   |     |                                                                                 |                                                |
|------------|-------------|---|-----|---------------------------------------------------------------------------------|------------------------------------------------|
| GO:0010756 | 0.000117492 | 2 | 5   | positive regulation of plasminogen activation                                   | 5,ZRANB3,EPC2,RAD54B,NBN,CEP164<br>PLGRKT,MFI2 |
| GO:0060249 | 0.000362269 | 5 | 154 | anatomical structure homeostasis                                                | SMC5,RAC1,PFKM,NBN,WDR36                       |
| GO:0000726 | 0.000504308 | 3 | 36  | non-recombinational repair                                                      | RAD52,XRCC4,NBN                                |
| GO:0071260 | 0.000701814 | 3 | 46  | cellular response to mechanical stimulus                                        | BAG3,RAC1,MAPK8                                |
| GO:0090329 | 0.000715345 | 3 | 41  | regulation of DNA-dependent DNA replication                                     | ZRANB3,DSCC1,NBN                               |
| GO:0032707 | 0.002512592 | 1 | 1   | negative regulation of interleukin-23 production                                | RAC1                                           |
| GO:0045002 | 0.002601058 | 1 | 1   | double-strand break repair via single-strand annealing                          | RAD52                                          |
| GO:0009877 | 0.003142512 | 1 | 1   | nodulation                                                                      | COQ3                                           |
| GO:0010795 | 0.003142512 | 1 | 1   | regulation of ubiquinone biosynthetic process                                   | COQ3                                           |
| GO:1905302 | 0.003242383 | 1 | 1   | negative regulation of macropinocytosis                                         | STX1B                                          |
| GO:0010165 | 0.003392055 | 2 | 23  | response to X-ray                                                               | ENSACAG00000008899,XRCC4                       |
| GO:0036031 | 0.003434285 | 1 | 2   | recruitment of mRNA capping enzyme to RNA polymerase II holoenzyme complex      | ENSACAG00000023921                             |
| GO:0016095 | 0.003480589 | 1 | 1   | polyprenol catabolic process                                                    | SRD5A3                                         |
| GO:0006789 | 0.004477313 | 1 | 1   | bilirubin conjugation                                                           | ENSACAG00000022125                             |
| GO:0070980 | 0.004477313 | 1 | 1   | biphenyl catabolic process                                                      | ENSACAG00000022125                             |
| GO:0034395 | 0.004620218 | 1 | 1   | regulation of transcription from RNA polymerase II promoter in response to iron | SLC40A1                                        |
| GO:0060345 | 0.004620218 | 1 | 1   | spleen trabecula formation                                                      | SLC40A1                                        |
| GO:1903988 | 0.004620218 | 1 | 1   | ferrous iron export                                                             | SLC40A1                                        |
| GO:0070899 | 0.004800792 | 1 | 1   | mitochondrial tRNA wobble uridine modification                                  | MTO1                                           |
| GO:1904527 | 0.00486269  | 1 | 1   | negative regulation of microtubule binding                                      | GTSE1                                          |
| GO:0021894 | 0.004921485 | 1 | 2   | cerebral cortex GABAergic interneuron development                               | RAC1                                           |
| GO:0093001 | 0.004922472 | 1 | 1   | glycolysis from storage polysaccharide through glucose-1-phosphate              | PFKM                                           |
| GO:0036292 | 0.005033754 | 1 | 1   | DNA rewinding                                                                   | ZRANB3                                         |
| GO:0032259 | 0.006264961 | 4 | 186 | methylation                                                                     | NSUN4,ENSACAG00000023921,COQ3,MTO1             |
| GO:0006826 | 0.006440195 | 2 | 33  | iron ion transport                                                              | MFI2,SLC40A1                                   |
| GO:0002551 | 0.006717719 | 1 | 2   | mast cell chemotaxis                                                            | RAC1                                           |

|            |             |   |     |                                                                    |                                          |
|------------|-------------|---|-----|--------------------------------------------------------------------|------------------------------------------|
| GO:0043687 | 0.006782741 | 2 | 31  | post-translational protein modification                            | ENSACAG00000009242,DSCC1                 |
| GO:0033037 | 0.007241434 | 1 | 2   | polysaccharide localization                                        | CHST13                                   |
| GO:0060025 | 0.007498225 | 1 | 2   | regulation of synaptic activity                                    | STX1B                                    |
| GO:1904224 | 0.007684283 | 1 | 2   | negative regulation of glucuronosyltransferase activity            | ENSACAG00000022125                       |
| GO:2001030 | 0.007684283 | 1 | 2   | negative regulation of cellular glucuronidation                    | ENSACAG00000022125                       |
| GO:0080163 | 0.007731222 | 1 | 2   | regulation of protein serine/threonine phosphatase activity        | PPP4R4                                   |
| GO:0003158 | 0.008328068 | 1 | 2   | endothelium development                                            | SLC40A1                                  |
| GO:0006473 | 0.008696978 | 3 | 102 | protein acetylation                                                | ATAT1,DSCC1,EPC2                         |
| GO:0023061 | 0.008883536 | 3 | 112 | signal release                                                     | STX1B,SYTL1,CPLX1                        |
| GO:0007258 | 0.008895522 | 1 | 2   | JUN phosphorylation                                                | MAPK8                                    |
| GO:0060151 | 0.008934931 | 1 | 2   | peroxisome localization                                            | PEX1                                     |
| GO:0060152 | 0.008934931 | 1 | 2   | microtubule-based peroxisome localization                          | PEX1                                     |
| GO:0051552 | 0.00938926  | 1 | 2   | flavone metabolic process                                          | ENSACAG00000022125                       |
| GO:0032392 | 0.009401059 | 2 | 34  | DNA geometric change                                               | ZRANB3,NBN                               |
| GO:0006015 | 0.00993461  | 1 | 3   | 5-phosphoribose 1-diphosphate biosynthetic process                 | PRPS2                                    |
| GO:0046391 | 0.00993461  | 1 | 3   | 5-phosphoribose 1-diphosphate metabolic process                    | PRPS2                                    |
| GO:0033601 | 0.010048738 | 1 | 2   | positive regulation of mammary gland epithelial cell proliferation | AGAP2                                    |
| GO:0006836 | 0.010401326 | 3 | 110 | neurotransmitter transport                                         | STX1B,SYTL1,CPLX1                        |
| GO:0051052 | 0.010984957 | 5 | 326 | regulation of DNA metabolic process                                | ENSACAG00000008899,ZRANB3,RAC1,DSCC1,NBN |
| GO:0075713 | 0.011352097 | 1 | 3   | establishment of integrated proviral latency                       | XRCC4                                    |
| GO:1900024 | 0.011514351 | 2 | 41  | regulation of substrate adhesion-dependent cell spreading          | MFI2,RAC1                                |
| GO:0043652 | 0.012077454 | 1 | 4   | engulfment of apoptotic cell                                       | RAC1                                     |
| GO:0002093 | 0.012305086 | 1 | 3   | auditory receptor cell morphogenesis                               | RAC1                                     |
| GO:0034086 | 0.012393217 | 1 | 3   | maintenance of sister chromatid cohesion                           | DSCC1                                    |
| GO:0034088 | 0.012393217 | 1 | 3   | maintenance of mitotic sister chromatid cohesion                   | DSCC1                                    |
| GO:0061669 | 0.013258988 | 1 | 3   | spontaneous neurotransmitter secretion                             | STX1B                                    |
| GO:0010822 | 0.013303175 | 2 | 53  | positive regulation of mitochondrion organization                  | NSUN4,MAPK8                              |
| GO:0042167 | 0.013308553 | 1 | 4   | heme catabolic process                                             | ENSACAG00000022125                       |

|            |             |   |     |                                                                |                          |
|------------|-------------|---|-----|----------------------------------------------------------------|--------------------------|
| GO:0097286 | 0.013768681 | 1 | 3   | iron ion import                                                | MFI2                     |
| GO:0051932 | 0.014837425 | 1 | 4   | synaptic transmission, GABAergic                               | RAC1                     |
| GO:0021826 | 0.01506116  | 1 | 5   | substrate-independent telencephalic tangential migration       | RAC1                     |
| GO:0030330 | 0.01567673  | 2 | 50  | DNA damage response, signal transduction by p53 class mediator | GTSE1,NBN                |
| GO:0043543 | 0.016402067 | 3 | 132 | protein acylation                                              | ATAT1,DSCC1,EPC2         |
| GO:0042178 | 0.0173593   | 1 | 5   | xenobiotic catabolic process                                   | ENSACAG00000022125       |
| GO:0001510 | 0.017546879 | 2 | 51  | RNA methylation                                                | NSUN4,MTO1               |
| GO:0031100 | 0.01771596  | 2 | 59  | animal organ regeneration                                      | PRPS2,ENSACAG00000022125 |
| GO:0010835 | 0.018317028 | 1 | 5   | regulation of protein ADP-ribosylation                         | C4orf27                  |
| GO:0071139 | 0.018741224 | 1 | 4   | resolution of recombination intermediates                      | SMC5                     |
| GO:0042256 | 0.019734795 | 1 | 5   | mature ribosome assembly                                       | NSUN4                    |
| GO:0016093 | 0.02090815  | 1 | 7   | polyprenol metabolic process                                   | SRD5A3                   |
| GO:0006167 | 0.022041989 | 1 | 6   | AMP biosynthetic process                                       | PRPS2                    |
| GO:0042770 | 0.022810584 | 2 | 60  | signal transduction in response to DNA damage                  | GTSE1,NBN                |
| GO:0009612 | 0.023537369 | 3 | 154 | response to mechanical stimulus                                | BAG3,RAC1,MAPK8          |
| GO:0016558 | 0.023758909 | 1 | 6   | protein import into peroxisome matrix                          | PEX1                     |
| GO:0055072 | 0.023899385 | 2 | 62  | iron ion homeostasis                                           | MFI2,SLC40A1             |
| GO:0090045 | 0.023945129 | 1 | 6   | positive regulation of deacetylase activity                    | MAPK8                    |
| GO:0033015 | 0.02403488  | 1 | 7   | tetrapyrrole catabolic process                                 | ENSACAG00000022125       |
| GO:0046149 | 0.02403488  | 1 | 7   | pigment catabolic process                                      | ENSACAG00000022125       |
| GO:0038095 | 0.025002251 | 2 | 82  | Fc-epsilon receptor signaling pathway                          | ENSACAG00000024242,MAPK8 |
| GO:0051276 | 0.025479054 | 4 | 271 | chromosome organization                                        | SMC5,ZRANB3,DSCC1,NBN    |
| GO:0045217 | 0.025987468 | 1 | 6   | cell-cell junction maintenance                                 | KIFC3                    |
| GO:0032049 | 0.026152347 | 1 | 7   | cardiolipin biosynthetic process                               | PGS1                     |
| GO:0060263 | 0.026331094 | 1 | 8   | regulation of respiratory burst                                | RAC1                     |
| GO:0006002 | 0.026755447 | 1 | 6   | fructose 6-phosphate metabolic process                         | PFKM                     |
| GO:0008300 | 0.026783044 | 1 | 7   | isoprenoid catabolic process                                   | SRD5A3                   |
| GO:0001832 | 0.027297657 | 1 | 6   | blastocyst growth                                              | NBN                      |
| GO:0051103 | 0.029795898 | 1 | 7   | DNA ligation involved in DNA repair                            | XRCC4                    |

|            |             |   |     |                                                                               |                          |
|------------|-------------|---|-----|-------------------------------------------------------------------------------|--------------------------|
| GO:0050951 | 0.029862947 | 1 | 7   | sensory perception of temperature stimulus                                    | TRPM3                    |
| GO:0009812 | 0.030953321 | 1 | 8   | flavonoid metabolic process                                                   | ENSACAG00000022125       |
| GO:0045876 | 0.031084725 | 1 | 7   | positive regulation of sister chromatid cohesion                              | SMC5                     |
| GO:0006063 | 0.032734971 | 1 | 8   | uronic acid metabolic process                                                 | ENSACAG00000022125       |
| GO:0018879 | 0.03345997  | 1 | 8   | biphenyl metabolic process                                                    | ENSACAG00000022125       |
| GO:0006906 | 0.033796206 | 2 | 84  | vesicle fusion                                                                | STX1B,SYTL1              |
| GO:0014041 | 0.033813888 | 1 | 9   | regulation of neuron maturation                                               | RAC1                     |
| GO:0000041 | 0.034366301 | 2 | 77  | transition metal ion transport                                                | MFI2,SLC40A1             |
| GO:0016925 | 0.034988255 | 2 | 68  | protein sumoylation                                                           | XRCC4,SMC5               |
| GO:0009312 | 0.035323968 | 1 | 11  | oligosaccharide biosynthetic process                                          | COQ3                     |
| GO:0090091 | 0.035763585 | 1 | 8   | positive regulation of extracellular matrix disassembly                       | MFI2                     |
| GO:0097264 | 0.036289876 | 1 | 9   | self proteolysis                                                              | CAPN7                    |
| GO:0006266 | 0.036504524 | 1 | 9   | DNA ligation                                                                  | XRCC4                    |
| GO:0043574 | 0.036595463 | 1 | 10  | peroxisomal transport                                                         | PEX1                     |
| GO:0097178 | 0.036782668 | 1 | 11  | ruffle assembly                                                               | RAC1                     |
| GO:0070525 | 0.03709151  | 1 | 9   | tRNA threonylcarbamoyladenosine metabolic process                             | MTO1                     |
| GO:1903749 | 0.037218686 | 1 | 11  | positive regulation of establishment of protein localization to mitochondrion | MAPK8                    |
| GO:0010664 | 0.037284084 | 1 | 9   | negative regulation of striated muscle cell apoptotic process                 | BAG3                     |
| GO:0070932 | 0.037835751 | 1 | 9   | histone H3 deacetylation                                                      | ELK4                     |
| GO:0071496 | 0.038289316 | 3 | 194 | cellular response to external stimulus                                        | BAG3,RAC1,MAPK8          |
| GO:0051187 | 0.040477435 | 1 | 12  | cofactor catabolic process                                                    | ENSACAG00000022125       |
| GO:0072331 | 0.041977356 | 2 | 87  | signal transduction by p53 class mediator                                     | GTSE1,NBN                |
| GO:0046339 | 0.04325344  | 1 | 11  | diacylglycerol metabolic process                                              | PGS1                     |
| GO:0042573 | 0.043420339 | 1 | 11  | retinoic acid metabolic process                                               | ENSACAG00000022125       |
| GO:0031099 | 0.044196754 | 2 | 95  | regeneration                                                                  | PRPS2,ENSACAG00000022125 |
| GO:0010592 | 0.04557161  | 1 | 13  | positive regulation of lamellipodium assembly                                 | RAC1                     |
| GO:0006972 | 0.048259431 | 1 | 14  | hyperosmotic response                                                         | RAC1                     |
| GO:0006007 | 0.048545852 | 1 | 11  | glucose catabolic process                                                     | PFKM                     |

|            |             |   |    |                                   |                    |
|------------|-------------|---|----|-----------------------------------|--------------------|
| GO:0016048 | 0.048782934 | 1 | 12 | detection of temperature stimulus | TRPM3              |
| GO:0046033 | 0.048795883 | 1 | 14 | AMP metabolic process             | PRPS2              |
| GO:0071361 | 0.049161505 | 1 | 12 | cellular response to ethanol      | ENSACAG00000022125 |
| GO:0002097 | 0.049515438 | 1 | 13 | tRNA wobble base modification     | MTO1               |

**Table S22. Categories showed continuous evolution with the elevation increasing in frogs.**

| category   | pvalue    | num<br>DEI<br>nCat | numIn<br>Cat | term                                              | <i>N. phrynooides</i>                                               | <i>N. liebigii</i>                           | <i>N. parkeri</i>                                                       |
|------------|-----------|--------------------|--------------|---------------------------------------------------|---------------------------------------------------------------------|----------------------------------------------|-------------------------------------------------------------------------|
| GO:0022618 | 4.40E-05  | 22                 | 199          | ribonucleoprotein complex assembly                | CIRBP,RPL11,PSIP1,DDX23,DDX6,SART1,ENSACAG00000004183,NUFIP1,ATXN2L | ENSACAG00000017034,SRPK3,EIF3H,MRPL20,NUFIP1 | YTHDC1,ABT1,LUC7L3,MDN1,RPS5,SART1,ATXN2,ENSACAG00000010260,SFSWAP,TGS1 |
| GO:0043122 | 0.0450509 | 14                 | 190          | regulation of I-kappaB kinase/NF-kappaB signaling | ATP2C1,OLFM4,FLNA,ENSACAG00000003867                                | SPHK1,ZFAND6,RIPK1,NLRX1,ENSACAG0000025660   | IRAK4,TRAF6,CANT1,MUL1,TNFAIP3,ENSACAG00000003867                       |
| GO:0051169 | 0.0033935 | 18                 | 188          | nuclear transport                                 | RSRC1,NOP58,HTATIP2,ENSACAG00000013788,ENSACAG00000026588,LSG1      | IPO9,HTATIP2,TNPO3,NUP93                     | NSRP1,ENSACAG0000002091,NUP85,HTATIP2,RBMX2,THOC5,NOC2L,TPR,NUP107,TGS1 |
| GO:0006366 | 0.0054727 | 17                 | 185          | transcription from RNA polymerase II promoter     | BMPR2,GTF2A1,NFIX,NR3C1,ZFH3,NFATC3                                 | ATF4,RPRD2,INTS9,ENSACAG00000014561,NMI      | ENSACAG00000009269,MBD1,ABT1,GATA1,AF4,SUPT5H                           |
| GO:0006913 | 0.0065337 | 17                 | 185          | nucleocytoplasmic transport                       | RSRC1,NOP58,HTATIP2,ENSACAG00000013788,ENSACAG00000026588,LSG1      | IPO9,HTATIP2,TNPO3,NUP93                     | NSRP1,ENSACAG0000002091,NUP85,HTATIP2,RBMX2,THOC5,TPR,NUP107,TGS1       |
| GO:0045926 | 0.016445  | 15                 | 183          | negative regulation of growth                     | RYK,PPT1,BMPR2,SMA2,ADIPOR1,FOXK1                                   | SEMA3D,LGMN,RTN4                             | DNAJC2,SEMA4D,LGMN,IDH3G,MUL1,ATXN2,SAV1                                |
| GO:0016485 | 0.002285  | 17                 | 182          | protein processing                                | CPN1,F7,PDCD2                                                       | BCL2L13,ATP6AP2,ADAMTS3,LGMN,HM13,A          | XPNPEP3,CLN5,FGG,LGMN,ENSACAG000000                                     |

|            |           |    |     |                                                                                      |                                                              |                                         |                   |                                                                                                                                                                                                                                                                                                                                                                                                                                                                                                                                                                      |
|------------|-----------|----|-----|--------------------------------------------------------------------------------------|--------------------------------------------------------------|-----------------------------------------|-------------------|----------------------------------------------------------------------------------------------------------------------------------------------------------------------------------------------------------------------------------------------------------------------------------------------------------------------------------------------------------------------------------------------------------------------------------------------------------------------------------------------------------------------------------------------------------------------|
| GO:0022411 | 0.0152713 | 15 | 175 | cellular component disassembly                                                       | ENSACAG00000009700                                           | HPN,NUP93,VILL                          | FG3L2,AEBP1,LONP2 | 06462,MUL1,TMEM208<br>MMP19,HSPG2,CDK5R<br>AP3,ENSACAG0000001<br>7760,MTIF2,STMN1,C12<br>orf65,TPR,NUP107,MRP<br>L48,FLOT1<br>PPIL2,PDIA4,ENSACAG<br>00000002091,FKBP4,PR<br>DX4,HSPH1,CCT4,ENS<br>ACAG00000017064,TBC<br>E,PDIA3<br>UTP20,MDN1,RPS5,DIE<br>XF,RPL13A,WDR3,SAR<br>T1,NOP56,CIRH1A<br>PIGX,LPCAT4,PCYT1A,<br>PLA2G6,IMPA1,ENSAC<br>AG00000003142<br>EPN1,MYH9,ADD1,GA<br>TA1,SIN3A,STIL,MYO1<br>E<br>FGG,VEGFA,ENSACAG<br>00000009367,ENSACAG<br>00000015364,MEN1<br>ENSACAG00000002091,<br>PRKAA1,ENSACAG000<br>00022125,CLK2,ENSAC<br>AG00000009367 |
| GO:0006457 | 0.0005765 | 17 | 168 | protein folding                                                                      | FKBP10,ENSACAG0000<br>0003016                                | FKBP9,TBCD,CRTAP,P<br>PIF,FKBP15        |                   |                                                                                                                                                                                                                                                                                                                                                                                                                                                                                                                                                                      |
| GO:0016072 | 0.0105773 | 14 | 168 | rRNA metabolic process                                                               | UTP6,NOP58,DIS3,SAR<br>T1,NOP56                              | WDR3,CHD7,WDR36                         |                   |                                                                                                                                                                                                                                                                                                                                                                                                                                                                                                                                                                      |
| GO:0008654 | 0.0020123 | 16 | 162 | phospholipid biosynthetic process                                                    | PGS1,GNPAT,OCRL,AB<br>HD3,GPAA1,LPCAT1                       | ETNK1,PIGX,CHKA,GG<br>PS1,LPCAT3        |                   |                                                                                                                                                                                                                                                                                                                                                                                                                                                                                                                                                                      |
| GO:0043009 | 0.0372336 | 13 | 154 | chordate embryonic development                                                       | MYH9,OCRL                                                    | IFITM5,MGAT1,RXRA,<br>ACVR1,HINFP       |                   |                                                                                                                                                                                                                                                                                                                                                                                                                                                                                                                                                                      |
| GO:0010810 | 0.008138  | 14 | 143 | regulation of cell-substrate adhesion                                                | NPNT,OLFM4,POSTN,F<br>LNA,DMTN,EMP2                          | PTN,TBCD,COL16A1,E<br>NSACAG00000015364 |                   |                                                                                                                                                                                                                                                                                                                                                                                                                                                                                                                                                                      |
| GO:0006109 | 0.007111  | 13 | 137 | regulation of carbohydrate metabolic process                                         | ENSACAG00000002886,<br>AP2A1,PPP4R3A,ADIPO<br>R1,GPER1,PLCD1 | SIRT6,ENSACAG00000<br>024726            |                   |                                                                                                                                                                                                                                                                                                                                                                                                                                                                                                                                                                      |
| GO:0000377 | 0.0456563 | 11 | 135 | RNA splicing, via transesterification reactions with bulged adenosine as nucleophile | RSRC1,DHX15,DDX23,<br>METTL3,SART1                           | ENSACAG00000017034,<br>PNN              |                   | SNRPB2,RBMX2,SART<br>1,DHX9,SFSWAP                                                                                                                                                                                                                                                                                                                                                                                                                                                                                                                                   |
| GO:0000398 | 0.0456563 | 11 | 135 | mRNA splicing, via spliceosome                                                       | RSRC1,DHX15,DDX23,<br>METTL3,SART1                           | ENSACAG00000017034,<br>PNN              |                   | SNRPB2,RBMX2,SART<br>1,DHX9,SFSWAP                                                                                                                                                                                                                                                                                                                                                                                                                                                                                                                                   |

|            |           |    |     |                                            |                                       |                                     |                                                     |
|------------|-----------|----|-----|--------------------------------------------|---------------------------------------|-------------------------------------|-----------------------------------------------------|
| GO:0005996 | 0.0382534 | 11 | 131 | monosaccharide metabolic process           | ENSACAG0000002886, RGN,MAN2C1,SLC37A4 | TKFC,ATF4                           | PRKAA1,ENSACAG000022125,ENSACAG00003913,H6PD,PGM2L1 |
| GO:0008360 | 0.0001382 | 17 | 130 | regulation of cell shape                   | SEPT7,MYH9,PLXNB2, FN1,TTBK1,DMTN     | PTN,TTBK2,EZR,HPN,VILL              | FGD4,MYH9,SEMA4D, ANXA1,SYNE3,BAIAP2,EZR,RHOU       |
| GO:0032846 | 0.0407951 | 11 | 130 | positive regulation of homeostatic process | ATP6AP1,GNL3,GPER1, CCT3              | PPP3CB                              | ENSACAG0000009269, GATA1,CCT4,STX4,PLA2G6,THY1      |
| GO:0009451 | 0.0171136 | 11 | 122 | RNA modification                           | NOP58,TYW5,METTL3, NOP56              | HEMK1,TXNDC9,TRIT1                  | TYW5,TRMT61B,THU MPD3,MOCS3,NOP56,TGS1              |
| GO:0051188 | 0.0011589 | 13 | 120 | cofactor biosynthetic process              | PCBD2,NADK2,ELOVL5,THEM5              | AGK,KMO,ENSACAG0000016077,ALAS1     | COX15,COQ2,COASY, MAT2B,MOCS3                       |
| GO:0043627 | 0.034995  | 10 | 115 | response to estrogen                       | ALDOA,F7,POSTN,GPER1                  | PTN,ENSACAG00000015364,MAPK15,PTGFR | MBD1,ENSACAG00000022125,ENSACAG00000015364,PTGFR    |
| GO:0034976 | 0.0125641 | 11 | 112 | response to endoplasmic reticulum stress   | PPP1R15B,ENSACAG0000003016            | ATF4,SEL1L,ATF6B,UBE4B              | PDIA4,PPP1R15B,CDK5 RAP3,PDIA3,PLA2G6,FLOT1         |
| GO:0017038 | 0.0261176 | 10 | 108 | protein import                             | NOP58                                 | IPO9,AFG3L2,TNPO3,NUP93,LONP2       | ENSACAG0000002091, NUP85,TPR,NUP107                 |
| GO:0009411 | 0.0389707 | 9  | 102 | response to UV                             | CIRBP                                 | PTN,ATF4,XPC,UBE4B                  | PRKAA1,NOC2L,MAPK8,MEN1                             |
| GO:1903708 | 0.0314611 | 9  | 98  | positive regulation of hemopoiesis         | ATP6AP1,PDCD2,SART1                   | RIPK1                               | GAS6,ENSACAG0000009269,ANXA1,GATA1,TRAF6,SART1      |
| GO:0007051 | 0.0280914 | 10 | 96  | spindle organization                       | MYH9,FLNA,CKAP5,KIAA0196              | EZR,ENSACAG00000001869              | MYH9,EZR,STIL,STMN1,NDC80,CEP120                    |
| GO:0044085 | 0.0079662 | 9  | 89  | cellular component biogenesis              | GNL3,LSG1,RPLP0                       | IPO9,COX19                          | COA1,NDUFAF4,NOC2L,TGS1                             |
| GO:0051262 | 0.0062233 | 10 | 87  | protein tetramerization                    | ALDOA,FARSA,GLS,DMN1                  | RXRA,HM13                           | SAMHD1,TK1,ACADL, NRXN1                             |

|            |           |    |    |                                                                                                 |                                              |                                    |                                                                 |
|------------|-----------|----|----|-------------------------------------------------------------------------------------------------|----------------------------------------------|------------------------------------|-----------------------------------------------------------------|
| GO:0006413 | 0.005323  | 9  | 86 | translational initiation                                                                        | ABCF1                                        | PAIP1,EIF3H                        | RPS5,MTIF2,RPL13A,ENSACAG00000004291,ENSACAG00000010260,MRPS18A |
| GO:0046165 | 0.0031463 | 10 | 80 | alcohol biosynthetic process                                                                    | HMGCR,ABHD3                                  | CHKA,SPHK1,GGPS1                   | PRKAA1,DPAGT1,PCYT1A,IMPA1,ENSACAG00000003142                   |
| GO:0032355 | 0.0200504 | 8  | 77 | response to estradiol                                                                           | F7,POSTN,GPER1                               | PTN,MAPK15,PTGFR                   | MBD1,ENSACAG00000022125,PTGFR                                   |
| GO:0050731 | 0.0235817 | 8  | 76 | positive regulation of peptidyl-tyrosine phosphorylation                                        | CTNND1,ADAM17                                | CTNND1                             | SRCIN1,GAS6,HSPH1,SEMA4D,GATA1,CTNND1,VEGFA                     |
| GO:0090100 | 0.0056596 | 9  | 74 | positive regulation of transmembrane receptor protein serine/threonine kinase signaling pathway | HIPK2,BMPR2,NPNT,ADAM17                      | BMP4,NEO1,NUP93                    | SDCBP,MEN1                                                      |
| GO:0043255 | 0.0060655 | 9  | 74 | regulation of carbohydrate biosynthetic process                                                 | ENSACAG00000002886,AP2A1,PPP4R3A,GPER1,PLCD1 | ENSACAG000000024726                | ENSACAG00000002091,CLK2,ENSACAG00000009367                      |
| GO:0050806 | 0.047133  | 7  | 71 | positive regulation of synaptic transmission                                                    | GPER1                                        | PTN                                | STX3,NRXN1,CLSTN3,STX4,FLOT1                                    |
| GO:0045454 | 0.0214802 | 7  | 70 | cell redox homeostasis                                                                          | ENSACAG00000003016                           | TXNDC9                             | PDIA4,PRDX4,TXNRD3,PDIA3,ENSACAG00000013018                     |
| GO:1903729 | 0.00018   | 11 | 68 | regulation of plasma membrane organization                                                      | ENSACAG00000013675,GPER1,ITGB1               | EPHA2,TMBIM1,EZR,LZTFL1            | PLS1,KALRN,STX3,EZR,STX4                                        |
| GO:0016925 | 0.0077647 | 9  | 68 | protein sumoylation                                                                             | STAG1,NOP58                                  | XPC,SENP5,NUP93                    | ENSACAG00000002091,RAD21,TPR,NUP107                             |
| GO:0008643 | 0.0031103 | 9  | 67 | carbohydrate transport                                                                          | ENSACAG00000002886,AQP3,SLC37A4              | STXBP3,SLC37A3,EZR,SLC37A2,SLC35F6 | PLS1,EZR                                                        |
| GO:0022406 | 0.0002783 | 10 | 65 | membrane docking                                                                                | CEP83                                        | STXBP3,CEP83,NSF,SYTL2,STXBP2,EZR  | CEP83,STX3,EZR,NRXN1,STX4,STX12                                 |
| GO:0015748 | 0.0257048 | 7  | 64 | organophosphate ester transport                                                                 | ATP11B,MFSD2A,ENSACAG00000015342,SCAR        | SLC37A2                            | MFSD2A,MTPP,SCARB1                                              |



|            |           |   |    |                                                                                           |                             |                               |                                       |
|------------|-----------|---|----|-------------------------------------------------------------------------------------------|-----------------------------|-------------------------------|---------------------------------------|
| GO:0006446 | 0.005677  | 8 | 59 | regulation of translational initiation                                                    | B1,SLC37A4<br>METTL3,EIF4G3 | ATF4,RXRA                     | RPL13A,EIF5B,ENSACAG00000010260,TPR   |
| GO:0032272 | 0.0176301 | 7 | 57 | negative regulation of protein polymerization                                             | LMOD3,DMTN                  | TBCD,VILL                     | ADD1,SPTBN2,STMN1                     |
| GO:0006487 | 0.036651  | 6 | 56 | protein N-linked glycosylation                                                            | B4GALT7                     | RPN2                          | ENSACAG00000016117,VCP,DPAGT1,ST3GAL4 |
| GO:1901184 | 0.0331375 | 6 | 55 | regulation of ERBB signaling pathway                                                      | ADAM17,GPER1                | LGMMN,RNF126                  | LGMMN,RHBDF2,AFAP1L2                  |
| GO:0048278 | 0.0002925 | 9 | 54 | vesicle docking                                                                           | CEP83                       | STXBP3,CEP83,NSF,SYTL2,STXBP2 | CEP83,STX3,NRXN1,STX4,STX12           |
| GO:0022613 | 0.0270442 | 6 | 54 | ribonucleoprotein complex biogenesis                                                      | GNL3,LSG1,RPLP0             | IPO9                          | NOC2L,TGS1                            |
| GO:0090277 | 0.0236804 | 6 | 53 | positive regulation of peptide hormone secretion                                          | GPER1                       | PPP3CB                        | FGG,STX4,PLA2G6,CCAR                  |
| GO:0031532 | 0.0397664 | 6 | 53 | actin cytoskeleton reorganization                                                         | ATP2C1,MYH9,FLNA            | EZR                           | MYH9,ANXA1,EZR,CCAR                   |
| GO:0006997 | 0.0032167 | 8 | 49 | nucleus organization                                                                      | HIPK2                       | SRPK3,RTN4,NUP93              | ENSACAG00000009269,GOLM1,TPR,NUP107   |
| GO:0098661 | 0.0041594 | 7 | 41 | inorganic anion transmembrane transport                                                   | SLC26A11,SLC37A4            | CPT1B,SLC37A2                 | SLC4A1,GLRB,RHCG                      |
| GO:0022904 | 0.0365691 | 4 | 41 | respiratory electron transport chain                                                      | COX4I1,NDUFB9               | SDHA                          | SDHA,ENSACAG00000007045               |
| GO:0051017 | 0.0006147 | 8 | 40 | actin filament bundle assembly                                                            | DPYSL3,FMN2,DMTN            | USH1C,EZR                     | PLS1,ADD1,BAIAP2,EZR                  |
| GO:0006909 | 0.0340946 | 5 | 40 | phagocytosis                                                                              | ENSACAG00000003016          | TUSC2                         | GAS6,ANXA1,PECAM1                     |
| GO:0043542 | 0.037613  | 5 | 39 | endothelial cell migration                                                                | MYH9,SCARB1,EMP2            | STARD13                       | MYH9,PECAM1,SCARB1                    |
| GO:0002504 | 0.0351977 | 5 | 38 | antigen processing and presentation of peptide or polysaccharide antigen via MHC class II | SEC24B                      | ENSACAG00000011986            | TRAF6,SPTBN2,AP1G1                    |
| GO:0046470 | 0.0059889 | 6 | 36 | phosphatidylcholine metabolic                                                             | ABHD3,LPCAT1                | CHKA,LPCAT3                   | LPCAT4,PCYT1A                         |

|            |           |   |    |                                                                      |                               |                           |                                     |
|------------|-----------|---|----|----------------------------------------------------------------------|-------------------------------|---------------------------|-------------------------------------|
| GO:0010501 | 0.0372238 | 5 | 36 | process<br>RNA secondary structure<br>unwinding                      | DDX23,DDX6,DDX55              | ENSACAG00000004703        | DDX24                               |
| GO:0061077 | 0.0013776 | 6 | 33 | chaperone-mediated protein<br>folding                                | FKBP10                        | FKBP9,CRTAP               | PDIA4,FKBP4,HSPH1                   |
| GO:0030574 | 0.0215224 | 5 | 32 | collagen catabolic process                                           | COL5A1                        | ADAMTS3,COL4A6,CO<br>L3A1 | MMP19,COL3A1                        |
| GO:1901264 | 0.0094633 | 5 | 31 | carbohydrate derivative<br>transport                                 | MFSD2A,SCARB1,SLC3<br>7A4     | SLC37A2                   | MFSD2A,SLC25A26,SC<br>ARB1          |
| GO:0019674 | 0.031326  | 4 | 30 | NAD metabolic process<br>maturation of SSU-rRNA from                 | NADK2                         | KMO                       | IDH3G,IDH3B                         |
| GO:0000462 | 0.0393944 | 4 | 30 | tracistronic rRNA transcript<br>(SSU-rRNA, 5.8S rRNA,<br>LSU-rRNA)   | UTP6                          | WDR3                      | UTP20,DIEXF,WDR3                    |
| GO:0070527 | 0.0067134 | 5 | 29 | platelet aggregation                                                 | MYH9,FLNA                     | STXBP3                    | MYH9,FGG,GATA1                      |
| GO:0032652 | 0.0083954 | 5 | 29 | regulation of interleukin-1<br>production                            | ENSACAG00000013588            | SPHK1                     | GAS6,ANXA1,TNFAIP3                  |
| GO:0006695 | 0.0369478 | 4 | 28 | cholesterol biosynthetic<br>process                                  | HMGCR                         | GGPS1                     | PRKAA1,ENSACAG000<br>00003142       |
| GO:0015701 | 0.0489908 | 4 | 28 | bicarbonate transport                                                | SLC26A11                      | SLC26A4,CA12              | SLC4A1                              |
| GO:0050994 | 0.0080256 | 5 | 27 | regulation of lipid catabolic<br>process                             | ENSACAG00000002886,<br>SCARB1 | LONP2                     | PRKAA1,PDE3B,SCAR<br>B1             |
| GO:1901998 | 0.0059761 | 5 | 26 | toxin transport                                                      | RAB43,CCT3,DNM1               | RAB28                     | CCT4                                |
| GO:0060349 | 0.0207314 | 4 | 24 | bone morphogenesis                                                   | BMPR2                         | IFITM5                    | CARM1,ENSACAG0000<br>0009367        |
| GO:0010803 | 0.0222199 | 4 | 24 | regulation of tumor necrosis<br>factor-mediated signaling<br>pathway | ENSACAG00000003867            | SPHK1                     | GAS6,TNFAIP3,ENSAC<br>AG00000003867 |
| GO:0001906 | 0.0122734 | 4 | 22 | cell killing                                                         | EMP2                          | STXBP2,TUSC2              | ENSACAG00000028691                  |
| GO:0060122 | 0.0228864 | 4 | 22 | inner ear receptor stereocilium<br>organization                      | IFT27,SEC24B                  | USH1C                     | CTHRC1                              |
| GO:0006261 | 0.0169774 | 4 | 21 | DNA-dependent DNA<br>replication                                     | RRM2B                         | MGME1                     | BAZ1A,POLD2                         |

|            |           |   |    |                                                                                        |           |                    |                    |
|------------|-----------|---|----|----------------------------------------------------------------------------------------|-----------|--------------------|--------------------|
| GO:0090200 | 0.0223388 | 3 | 19 | positive regulation of release of cytochrome c from mitochondria                       | GPER1     | PPIF               | PLA2G6             |
| GO:0006515 | 0.0074906 | 4 | 18 | misfolded or incompletely synthesized protein catabolic process                        | POMT2     | RNF126,LONP2       | UFD1L              |
| GO:0097066 | 0.0344866 | 3 | 16 | response to thyroid hormone                                                            | F7        | HPN                | GATA1              |
| GO:0031579 | 0.0016951 | 4 | 14 | membrane raft organization                                                             | PPT1,EMP2 | FLOT2              | FLOT1              |
| GO:0046931 | 0.0032926 | 4 | 12 | pore complex assembly                                                                  | CCT3      | RTN4,NUP93         | NUP107             |
| GO:0001765 | 0.0038785 | 3 | 10 | membrane raft assembly                                                                 | EMP2      | FLOT2              | FLOT1              |
| GO:0071295 | 0.004781  | 3 | 9  | cellular response to vitamin                                                           | POSTN     | PTN                | GAS6               |
| GO:0002446 | 0.0020329 | 3 | 7  | neutrophil mediated immunity                                                           | ADAM17    | TUSC2              | IRAK4              |
| GO:0030575 | 0.004434  | 3 | 7  | nuclear body organization                                                              | HIPK2     | SRPK3              | ENSACAG00000009269 |
| GO:0051660 | 0.0233717 | 2 | 5  | establishment of centrosome localization                                               | CEP83     | CEP83,EZR          | CEP83,EZR          |
| GO:1903912 | 0.0110545 | 2 | 4  | negative regulation of endoplasmic reticulum stress-induced eIF2 alpha phosphorylation | PPP1R15B  | ENSACAG00000017545 | PPP1R15B           |

**Table S23. Categories showed continuous evolution with the elevation increasing in lizards.**

| category   | pvalue      | numDE<br>InCat | numIn<br>Cat | term                                           | <i>Ph. putjatia</i>               | <i>Ph. vlangualii</i> | <i>Ph. erythrurus</i>                    |
|------------|-------------|----------------|--------------|------------------------------------------------|-----------------------------------|-----------------------|------------------------------------------|
| GO:0032259 | 0.001128425 | 10             | 186          | methylation                                    | NSUN4,ENSACAG0000023921,COQ3,MTO1 | RBBP5,TGS1            | DDX4,HNMT,MTO1,FTSJ2,TRDMT1              |
| GO:0006091 | 0.019736421 | 7              | 179          | generation of precursor metabolites and energy | PFKM                              | HKDC1,PPP1R1A,PP1R3B  | UQCRC2,HKDC1,PGM2,PPP1R2                 |
| GO:0006399 | 0.000647395 | 10             | 176          | tRNA metabolic process                         | MTO1                              | PUS7,DARS,AARS        | TRMU,EXOSC8,QRS,MTO1,RPUSD4,TRUB2,TRDMT1 |
| GO:0060249 | 0.001115317 | 9              | 154          | anatomical structure                           | SMC5,RAC1,PFKM,N                  | RAC1,BBS10            | GIGYF2,GCNT2,DC                          |

|            |             |    |     |                                                     |                                       |                       |                                                       |
|------------|-------------|----|-----|-----------------------------------------------------|---------------------------------------|-----------------------|-------------------------------------------------------|
| GO:0009612 | 0.044973927 | 6  | 154 | homeostasis                                         | BN,WDR36                              |                       | LRE1A                                                 |
|            |             |    |     | response to mechanical stimulus                     | BAG3,RAC1                             | FADD,FYN,RAC1         | XPC,INHBE                                             |
| GO:0051054 | 0.03405449  | 6  | 150 | positive regulation of DNA metabolic process        | ENSACAG0000000889<br>9,RAC1,DSCC1,NBN | RNF168,RAC1           | WRAP53                                                |
| GO:0006302 | 0.000548123 | 9  | 138 | double-strand break repair                          | RAD52,XRCC4,SMC5,<br>NBN              | RNF168                | EXD2,LIG4,CCDC1<br>55,DCLRE1A                         |
| GO:0005996 | 0.023565571 | 6  | 131 | monosaccharide metabolic process                    | ENSACAG0000002212<br>5,PFKM           | HKDC1                 | HKDC1,ENSACAG<br>0000003913,PGM2,<br>BRAT1            |
| GO:0009451 | 2.87E-05    | 10 | 122 | RNA modification                                    | NSUN4,MTO1                            | PUS7,AARS,TGS1        | TRMU,MTO1,RPUS<br>D4,FTSJ2,TRUB2,T<br>RDMT1           |
| GO:0044262 | 0.000975316 | 8  | 120 | cellular carbohydrate metabolic process             | COQ3,PFKM                             | PPP1R1A,PPP1R3B       | ALG8,PGM2,IMPA<br>1,PPP1R2                            |
| GO:0009306 | 0.015418936 | 6  | 120 | protein secretion                                   | SNCG,CPLX1                            | LCP2                  | ENSACAG0000001<br>1849,LCP2,PAFAH1<br>B1,CPLX1,STEAP3 |
| GO:0017038 | 0.008216473 | 6  | 108 | protein import                                      | PEX1                                  | CSE1L                 | ENSACAG0000001<br>1849,MCM3AP,RA<br>NBP17,LONP2       |
| GO:0010212 | 0.021140086 | 5  | 101 | response to ionizing radiation                      | ENSACAG0000000889<br>9,XRCC4          | RNF168                | ECT2,BRAT1                                            |
| GO:0015980 | 0.003891926 | 6  | 96  | energy derivation by oxidation of organic compounds | PFKM                                  | PPP1R1A,PPP1R3B       | UQCRC2,PGM2,PP<br>P1R2                                |
| GO:0001894 | 0.019069575 | 5  | 95  | tissue homeostasis                                  | RAC1,WDR36                            | RAC1,BBS10            | GIGYF2,GCNT2                                          |
| GO:0044085 | 0.03631386  | 4  | 89  | cellular component biogenesis                       | ENSACAG0000000924<br>2                | ZNF622,TGS1           | NOP16                                                 |
| GO:0055076 | 0.01138443  | 5  | 85  | transition metal ion homeostasis                    | MFI2,SLC40A1                          | SLC39A14,SLC22A1<br>7 | STEAP3                                                |
| GO:0005976 | 0.012567898 | 5  | 81  | polysaccharide metabolic process                    | PFKM                                  | PPP1R1A,PPP1R3B       | PGM2,PPP1R2                                           |
| GO:0030516 | 0.015747927 | 5  | 80  | regulation of axon extension                        | WDR36                                 | CDKL5,DNM2            | CDK5R1,PAFAH1B<br>1                                   |

|            |             |   |    |                                                          |                    |                 |                      |
|------------|-------------|---|----|----------------------------------------------------------|--------------------|-----------------|----------------------|
| GO:0000041 | 0.033538076 | 4 | 77 | transition metal ion transport                           | MFI2,SLC40A1       | SLC39A14        | STEAP3               |
| GO:0050905 | 0.00828918  | 5 | 72 | neuromuscular process                                    | NBN                | AARS            | GIGYF2,PENK,PAFAH1B1 |
| GO:0016925 | 0.008034912 | 5 | 68 | protein sumoylation                                      | XRCC4,SMC5         | RNF168,SENP5    | XPC                  |
| GO:0022613 | 0.009599317 | 4 | 54 | ribonucleoprotein complex biogenesis                     | ENSACAG00000009242 | ZNF622,TGS1     | NOP16                |
| GO:0006073 | 0.001925423 | 5 | 52 | cellular glucan metabolic process                        | PFKM               | PPP1R1A,PPP1R3B | PGM2,PPP1R2          |
| GO:0001510 | 0.001659181 | 5 | 51 | RNA methylation                                          | NSUN4,MTO1         | TGS1            | MTO1,FTSJ2,TRDMT1    |
| GO:0050885 | 0.007655503 | 4 | 45 | neuromuscular process controlling balance                | NBN                | AARS            | GIGYF2,PAFAH1B1      |
| GO:0048489 | 0.033420882 | 3 | 45 | synaptic vesicle transport                               | CPLX1              | BLOC1S5,AP3M2   | CPLX1                |
| GO:0006970 | 0.038017454 | 3 | 45 | response to osmotic stress                               | RAC1               | RAC1            | HNMT,MAP7D3          |
| GO:0002200 | 0.023242819 | 3 | 37 | somatic diversification of immune receptors              | NBN                | RNF168          | LIG4                 |
| GO:0000726 | 4.39E-05    | 6 | 36 | non-recombinational repair                               | RAD52,XRCC4,NBN    | RNF168          | LIG4,DCLRE1A         |
| GO:0006303 | 0.0004354   | 5 | 35 | double-strand break repair via nonhomologous end joining | XRCC4,NBN          | RNF168          | LIG4,DCLRE1A         |
| GO:0006826 | 0.001501831 | 4 | 33 | iron ion transport                                       | MFI2,SLC40A1       | SLC39A14        | STEAP3               |
| GO:0016444 | 0.012669132 | 3 | 29 | somatic cell DNA recombination                           | NBN                | RNF168          | LIG4                 |
| GO:0021884 | 0.043436728 | 2 | 20 | forebrain neuron development                             | RAC1               | RAC1            | DCLK2                |
| GO:0016447 | 0.003548175 | 3 | 19 | somatic recombination of immunoglobulin gene segments    | NBN                | RNF168          | LIG4                 |
| GO:0006972 | 0.017237487 | 2 | 14 | hyperosmotic response                                    | RAC1               | RAC1            | HNMT                 |
| GO:0006488 | 0.019078854 | 2 | 14 | dolichol-linked oligosaccharide biosynthetic process     | SRD5A3             | SRD5A3          | ALG8                 |

**Table S24. Expression profile across different tissues for frogs (value showed with TPM).**

| Lineage           | PSGs               | brain   | heart | liver | ovary   | skin | testis |
|-------------------|--------------------|---------|-------|-------|---------|------|--------|
| <i>N. parkeri</i> | ENSACAP00000001268 | 1.66942 | 0     | 0     | 0.54158 | 0    | 0      |

|                    |          |          |          |          |          |          |
|--------------------|----------|----------|----------|----------|----------|----------|
| ENSACAP00000004182 | 5.13715  | 0        | 0        | 0.083873 | 0.064615 | 0        |
| ENSACAP00000012691 | 0.883662 | 4.7322   | 0.854152 | 1.39852  | 14.2309  | 0.395573 |
| ENSACAP00000000393 | 1.17447  | 0.278061 | 0.023366 | 0.09667  | 0.13509  | 0.010775 |
| ENSACAP00000021105 | 1.44922  | 0.617614 | 0.230895 | 1.40177  | 0.884922 | 0        |
| ENSACAP00000019544 | 2.47595  | 0.107731 | 0.341818 | 0        | 0.15758  | 0        |
| ENSACAP00000005325 | 3.17391  | 0.682129 | 0.374374 | 0.361927 | 0.413667 | 0.18447  |
| ENSACAP00000013343 | 0.047416 | 0.016707 | 0.066948 | 0.036537 | 83.0341  | 0        |
| ENSACAP00000004963 | 0.305515 | 1.17723  | 1.20636  | 0.24683  | 0.373459 | 0        |
| ENSACAP00000014854 | 1.86186  | 0.432994 | 0.24441  | 1.0035   | 0        | 0.985896 |
| ENSACAP00000003231 | 1.50713  | 0.277078 | 0.204506 | 0        | 0.459033 | 0.101471 |
| ENSACAP00000007242 | 1.74389  | 0.89156  | 0.13626  | 0        | 0.768176 | 0.065787 |
| ENSACAP00000013979 | 0.783252 | 0.441311 | 0.539173 | 0        | 0.09487  | 0        |
| ENSACAP00000013586 | 7.51213  | 27.2975  | 19.1852  | 3.69759  | 17.6897  | 4.16386  |
| ENSACAP00000011725 | 516.143  | 1.79631  | 0.406369 | 1.19498  | 0.87307  | 11.2642  |
| ENSACAP00000016051 | 1.76494  | 0.520353 | 0.701302 | 6.40595  | 0.718653 | 0.117363 |
| ENSACAP00000007394 | 2.26087  | 1.78311  | 1.26312  | 0.261584 | 1.38326  | 0.255604 |
| ENSACAP00000017662 | 0        | 0.030319 | 0        | 0.107039 | 2.85496  | 0        |
| ENSACAP00000005070 | 0.516406 | 1.32392  | 0.332108 | 0.401234 | 0.217485 | 0.044196 |
| ENSACAP00000016161 | 2.74964  | 0.107021 | 0.723817 | 0        | 0.373459 | 0.243001 |
| ENSACAP00000002067 | 0.31038  | 0.100539 | 0.204736 | 0.619422 | 3.01315  | 1.40706  |
| ENSACAP00000006467 | 0.277487 | 0.636511 | 0.165589 | 0.072325 | 0.223171 | 0        |
| ENSACAP00000000009 | 8.81785  | 4.00504  | 0.845297 | 0.279378 | 2.20248  | 0.274522 |
| ENSACAP00000016725 | 0.816875 | 2.03724  | 0.068896 | 0.028784 | 0.066959 | 0.047866 |
| ENSACAP00000009344 | 7.21238  | 6.63265  | 4.31523  | 17.9074  | 5.51444  | 0.983719 |
| ENSACAP00000013023 | 6.01736  | 2.96299  | 0.238213 | 11.4169  | 0.367675 | 2.75565  |
| ENSACAP00000012178 | 0.779566 | 0.254431 | 0.294112 | 0        | 0        | 4.23323  |
| ENSACAP00000004705 | 0.554974 | 0.358037 | 0.165589 | 0.144651 | 0.167378 | 0        |
| ENSACAP00000007336 | 0        | 0        | 0.270821 | 0.285735 | 1.50881  | 0        |
| ENSACAP00000010433 | 35.7092  | 51.6677  | 20.4315  | 84.4721  | 21.7779  | 26.4856  |
| ENSACAP00000008788 | 9.2377   | 5.2875   | 3.14106  | 1.65271  | 1.74173  | 0.280013 |
| ENSACAP00000006622 | 13.0979  | 5.10435  | 2.70693  | 0.431949 | 4.34102  | 0.442593 |

|                    |          |          |          |          |          |          |
|--------------------|----------|----------|----------|----------|----------|----------|
| ENSACAP00000016880 | 5.47588  | 2.66308  | 2.86097  | 15.4103  | 3.50735  | 0.879063 |
| ENSACAP00000003197 | 5.71194  | 1.73098  | 2.00104  | 12.4919  | 3.68892  | 0.791226 |
| ENSACAP00000003628 | 20.2662  | 12.8954  | 5.52298  | 39.9398  | 16.238   | 1.92313  |
| ENSACAP00000016904 | 0.567044 | 0.765848 | 0        | 0        | 0.279781 | 0        |
| ENSACAP00000017487 | 0        | 18.2489  | 0.128345 | 0        | 0        | 0        |
| ENSACAP00000000793 | 6.19645  | 6.52409  | 0        | 0.382167 | 0.663962 | 0        |
| ENSACAP00000002963 | 0        | 0        | 0.02682  | 0        | 6.47821  | 0        |
| ENSACAP00000015276 | 6.94465  | 4.9163   | 3.33989  | 14.2183  | 5.1689   | 2.01E-05 |
| ENSACAP00000016415 | 1.10222  | 0.356035 | 1.05274  | 0.25591  | 1.65657  | 1.86721  |
| ENSACAP00000015745 | 32.6422  | 31.049   | 19.4354  | 60.0552  | 35.5918  | 3.44223  |
| ENSACAP00000007730 | 10.5757  | 2.1792   | 3.67992  | 3.70624  | 2.85389  | 3.50107  |
| ENSACAP00000015007 | 9.68587  | 0.048718 | 0.032623 | 0        | 0.072952 | 0.082512 |
| ENSACAP00000008624 | 1.12004  | 0.401106 | 1.82539  | 0        | 0        | 0        |
| ENSACAP00000005301 | 2.76918  | 0.062662 | 0.298004 | 27.5745  | 7.6058   | 1.12755  |
| ENSACAP00000006308 | 1.74617  | 0.88231  | 0.371433 | 0.366568 | 0.284266 | 0.132411 |
| ENSACAP00000011162 | 2.16701  | 0.703883 | 0.105908 | 1.13451  | 1.81865  | 0.101024 |
| ENSACAP00000003937 | 0.114534 | 0.106108 | 0.268466 | 0.092103 | 0.045911 | 0        |
| ENSACAP00000022713 | 1.84943  | 6.98685  | 0.336132 | 0        | 0        | 0        |
| ENSACAP00000005539 | 14.2074  | 1.78274  | 0.110032 | 2.12456  | 0.638193 | 0.254121 |
| ENSACAP00000002825 | 1.08314  | 0.424116 | 0.174252 | 0.099195 | 0.345262 | 0.027171 |
| ENSACAP00000015105 | 10.413   | 0        | 0        | 0.368963 | 0        | 0        |
| ENSACAP00000009198 | 8.39421  | 13.92    | 2.8      | 9.04662  | 2.51547  | 0.49055  |
| ENSACAP00000000046 | 1.36897  | 0.394531 | 0        | 0        | 0.50105  | 0.109883 |
| ENSACAP00000007271 | 17.6837  | 4.32029  | 3.0307   | 2.4408   | 4.4562   | 2.58459  |
| ENSACAP00000001312 | 19.397   | 0.489868 | 0.354338 | 8.62214  | 0.957595 | 0.79428  |
| ENSACAP00000012483 | 1.32621  | 1.4718   | 7.32812  | 0.676133 | 243.407  | 1.4106   |
| ENSACAP00000014578 | 0.220547 | 0.130361 | 1.50558  | 0.244411 | 0.993845 | 0.042126 |
| ENSACAP00000005642 | 1.65202  | 0.512067 | 5.22111  | 0.219895 | 1.93054  | 0.060674 |
| ENSACAP00000005884 | 12.193   | 2.84026  | 6.09655  | 107.432  | 14.7043  | 10.455   |
| ENSACAP00000007428 | 2.65508  | 0.631503 | 0.70796  | 1.66381  | 1.05283  | 0.193254 |
| ENSACAP00000000854 | 1.98398  | 0.570762 | 0.429126 | 2.31505  | 0.967413 | 0.02477  |

|                    |          |          |          |          |          |          |
|--------------------|----------|----------|----------|----------|----------|----------|
| ENSACAP00000017164 | 3.63169  | 0.442748 | 0.045185 | 0.15247  | 1.03328  | 0.231191 |
| ENSACAP00000012761 | 1.9266   | 0.575508 | 0.133694 | 0.232939 | 0.996563 | 0        |
| ENSACAP00000016181 | 1.57687  | 0.445389 | 0.275802 | 0.330669 | 0.41003  | 0.03657  |
| ENSACAP00000009285 | 0.116659 | 0        | 0.337744 | 0        | 0        | 0.294573 |
| ENSACAP00000004516 | 19.1077  | 0.156166 | 0.105671 | 10.5532  | 0.045672 | 0.228474 |
| ENSACAP00000004794 | 0.146299 | 0.064253 | 0        | 0        | 0.969528 | 0        |
| ENSACAP00000012225 | 1.08336  | 0        | 0        | 0        | 0.312791 | 0        |
| ENSACAP00000013843 | 0.244949 | 0        | 7.65481  | 0        | 0.163594 | 0.242691 |
| ENSACAP00000004798 | 170.223  | 163.917  | 42.1363  | 183.883  | 25.9092  | 25.4061  |
| ENSACAP00000009019 | 8.34406  | 11.229   | 7.27089  | 32.3411  | 6.38086  | 34.1099  |
| ENSACAP00000011061 | 0.49922  | 0.249985 | 0.063388 | 0.058417 | 0.142146 | 0        |
| ENSACAP00000017694 | 3.04968  | 1.08082  | 0.757238 | 135.317  | 2.5795   | 1.04336  |
| ENSACAP00000003860 | 0.1282   | 0        | 2.35697  | 0        | 0        | 0.053669 |
| ENSACAP00000010908 | 0.607234 | 2.43688  | 4.60496  | 0.107532 | 6.91495  | 0.139711 |
| ENSACAP00000014494 | 0        | 1.11642  | 0.130235 | 0.152234 | 0        | 0        |
| ENSACAP00000012985 | 0.174733 | 0.255143 | 0.000841 | 3.1825   | 4.7283   | 160.246  |
| ENSACAP00000003608 | 1.65932  | 0.53217  | 0.573272 | 1.17911  | 1.11393  | 1.16225  |
| ENSACAP00000012337 | 0.149468 | 0.059485 | 0.138049 | 0        | 0.034801 | 0        |
| ENSACAP00000015226 | 1.32797  | 1.16574  | 0        | 0.147384 | 0.316828 | 0.178207 |
| ENSACAP00000014890 | 3.21689  | 0.964052 | 1.52274  | 5.37753  | 0.646676 | 0.151311 |
| ENSACAP00000011156 | 1.49864  | 0.119681 | 1.27979  | 1.21965  | 0.713977 | 0.155943 |
| ENSACAP00000013808 | 7.3827   | 3.62964  | 2.64412  | 0.047145 | 0        | 3.43953  |
| ENSACAP00000004015 | 0        | 0.229598 | 0.930233 | 0.163728 | 0.685839 | 0.127395 |
| ENSACAP00000017100 | 55.7501  | 19.5831  | 13.3192  | 24.2466  | 12.5126  | 2.63052  |
| ENSACAP00000015631 | 9.40E-09 | 8.88E-06 | 3.27E-07 | 0        | 0        | 0        |
| ENSACAP00000005421 | 0        | 0        | 5.42053  | 0.502907 | 0        | 0        |
| ENSACAP00000007049 | 6.24091  | 1.89612  | 2.35352  | 5.05463  | 3.66604  | 0.067083 |
| ENSACAP00000015272 | 13.9726  | 1.06178  | 0.488294 | 1.81388  | 3.40125  | 0.233253 |
| ENSACAP00000007102 | 0.020182 | 0.214514 | 1.90866  | 0        | 1.08941  | 0        |
| ENSACAP00000009201 | 0.039097 | 4.50572  | 1.11894  | 0        | 0.082168 | 0.016885 |
| ENSACAP00000002142 | 14.7502  | 5.31017  | 0.904376 | 0.549051 | 2.88469  | 0.525338 |



|                     |          |          |          |          |          |          |
|---------------------|----------|----------|----------|----------|----------|----------|
| ENSACAP00000006180  | 1.4823   | 0.554486 | 0        | 0.74243  | 0.407495 | 0        |
| ENSACAP00000016842  | 1.41477  | 0.232207 | 0.470624 | 0.560404 | 0.922353 | 0.311553 |
| ENSACAP00000008722  | 2.95572  | 0.643321 | 0.416583 | 0.092815 | 0.857168 | 0.049636 |
| ENSACAP00000001499  | 3.64517  | 23.9905  | 0        | 18.0917  | 0        | 0.234759 |
| ENSACAP00000023346  | 8.93245  | 16.9729  | 2.29615  | 0.939221 | 13.0426  | 0.17333  |
| ENSACAP00000000890  | 1.02528  | 0.214921 | 0.495916 | 0.234616 | 0.181527 | 0        |
| ENSACAP00000008201  | 192.075  | 129.565  | 49.6952  | 92.285   | 55.0889  | 91.8792  |
| ENSACAP00000017329  | 0.716397 | 0.637891 | 0.711072 | 0.048877 | 1.18942  | 0.100052 |
| ENSACAP00000004544  | 0.511542 | 0.215309 | 0.13106  | 0        | 0.051561 | 10.7736  |
| ENSACAP00000006856  | 0.101072 | 17.5081  | 1.27045  | 10.1121  | 7.12105  | 0.217168 |
| ENSACAP00000007237  | 0.212149 | 0.065852 | 1.55403  | 0.073862 | 0.86918  | 0        |
| ENSACAP00000022376  | 0.003353 | 0        | 0        | 0        | 0        | 0        |
| ENSACAP00000007053  | 261.465  | 36.5447  | 15.0765  | 73.4213  | 15.77    | 3.23552  |
| ENSACAP00000015992  | 1.90336  | 0.489776 | 0.170089 | 0.148891 | 0.287073 | 0.281544 |
| ENSACAP00000009563  | 0.235145 | 2.46658  | 0        | 0.348381 | 0.119494 | 0.114555 |
| ENSACAP00000007585  | 0.11496  | 0        | 0.010404 | 0.030867 | 7.46901  | 0.047735 |
| ENSACAP00000001537  | 0        | 0.01391  | 0.028126 | 0.177834 | 7.1186   | 0.025989 |
| ENSACAP00000008316  | 0.278611 | 0.192494 | 0.35135  | 0        | 0.399779 | 0        |
| ENSACAP00000008329  | 17.4216  | 4.73822  | 7.70227  | 50.1293  | 13.7315  | 0.997585 |
| ENSACAP00000009005  | 1.32832  | 0.518482 | 0.509949 | 2.69E-08 | 0.731309 | 0        |
| ENSACAP00000007281  | 4.2878   | 2.60195  | 0.442048 | 0        | 0.097557 | 0.041068 |
| ENSACAP00000013361  | 5.01778  | 3.84245  | 1.98091  | 27.6236  | 1.79389  | 15.7587  |
| ENSACAP00000006603  | 3.48984  | 0        | 0        | 0.053239 | 0.104108 | 0        |
| ENSACAP00000012565  | 2.03486  | 0.280467 | 0.035591 | 0.178614 | 0.646259 | 0.032984 |
| ENSACAP00000009562  | 0.676676 | 0.180423 | 0.116734 | 0.061838 | 0.302388 | 0        |
| ENSACAP00000001330  | 18.1719  | 8.74336  | 3.28708  | 6.9481   | 3.94074  | 0.391432 |
| ENSACAP00000006839  | 7.58873  | 9.06447  | 3.89833  | 1.63459  | 5.05239  | 0.5388   |
| ENSACAP00000001974  | 0.020126 | 1.75649  | 0.090565 | 1.27116  | 0.314749 | 0.201079 |
| ENSACAP000000011505 | 0.157732 | 0        | 0.012218 | 0.004461 | 0        | 0        |
| ENSACAP00000009442  | 6.10223  | 0.040902 | 1.46484  | 0.118436 | 0.012006 | 0        |
| ENSACAP00000000846  | 0.48627  | 0.085849 | 3.30829  | 7.19455  | 7.42466  | 0.111841 |

|                    |          |          |          |          |          |          |
|--------------------|----------|----------|----------|----------|----------|----------|
| ENSACAP00000016430 | 2.18788  | 0.459982 | 0.444072 | 0.141862 | 0.804883 | 0.59659  |
| ENSACAP00000015583 | 0.144867 | 0        | 0.029505 | 0        | 0.213232 | 0        |
| ENSACAP00000018251 | 0.551075 | 0.896368 | 0.007232 | 0        | 0        | 0        |
| ENSACAP00000013512 | 0        | 0.525428 | 1.63033  | 1.97961  | 0.1698   | 0        |
| ENSACAP00000002485 | 8.5208   | 5.33781  | 2.57254  | 14.3908  | 2.79478  | 0.559395 |
| ENSACAP00000014506 | 24.9994  | 1.56587  | 0.243947 | 0.106288 | 0.500555 | 0.006815 |
| ENSACAP00000016238 | 46.7859  | 54.7062  | 21.8036  | 19.3799  | 8.47648  | 11.3832  |
| ENSACAP00000012387 | 1.72747  | 1.37266  | 0.099552 | 10.0714  | 0.223554 | 0.387105 |
| ENSACAP00000010845 | 0.377049 | 0        | 0        | 0        | 0        | 0        |
| ENSACAP00000016703 | 1.40746  | 0        | 0        | 0        | 0        | 0        |
| ENSACAP00000015098 | 0.513579 | 0.237164 | 9.74E-05 | 0.077737 | 0.175871 | 0.006067 |
| ENSACAP00000012411 | 4.75472  | 1.36408  | 0        | 0        | 0        | 0.164794 |
| ENSACAP00000001397 | 0.358894 | 0.000189 | 0.1419   | 2.38272  | 0.149175 | 0.208689 |
| ENSACAP00000009399 | 0.044132 | 0.003526 | 1.36483  | 0        | 0.025346 | 0        |
| ENSACAP00000008027 | 3.42624  | 0        | 0        | 0.063059 | 0        | 0        |
| ENSACAP00000015970 | 8.68882  | 9.67187  | 2.43269  | 71.4532  | 7.41616  | 0.762016 |
| ENSACAP00000003593 | 3.75902  | 0        | 0        | 0        | 0        | 0.09447  |
| ENSACAP00000005755 | 0.071308 | 0.033679 | 0.169205 | 0        | 0.141875 | 0.071312 |
| ENSACAP00000008480 | 2.77854  | 0.814642 | 0.294214 | 0.46103  | 0.398431 | 0.532682 |
| ENSACAP00000000029 | 0.085071 | 0.039938 | 0        | 2.24E-10 | 0        | 7.35E-05 |
| ENSACAP00000006928 | 4.60227  | 0.259519 | 0.123609 | 3.36918  | 0.137556 | 0.037    |
| ENSACAP00000014383 | 0.47547  | 1.50895  | 0.911373 | 0.451241 | 0.428312 | 0.055969 |
| ENSACAP00000007491 | 1.95551  | 1.56666  | 1.38646  | 0.120405 | 0.676525 | 0.016759 |
| ENSACAP00000013049 | 1.22532  | 0.895067 | 0.118617 | 0        | 0.247046 | 0.056867 |
| ENSACAP00000010338 | 0        | 0        | 0.056441 | 0.365118 | 0.177651 | 0.22893  |
| ENSACAP00000005673 | 1.94514  | 0        | 0        | 0        | 0.197527 | 0.027925 |
| ENSACAP00000017486 | 1.86236  | 1.41651  | 0.987732 | 0.361943 | 1.49718  | 0.095318 |
| ENSACAP00000017515 | 0        | 0.11206  | 0.73573  | 0        | 0        | 0.167148 |
| ENSACAP00000006654 | 0.000266 | 0.305633 | 0.075803 | 0        | 0        | 0.075819 |
| ENSACAP00000002993 | 4.12357  | 1.81784  | 1.31539  | 0.294598 | 2.56793  | 0        |
| ENSACAP00000009450 | 1.09656  | 1.15377  | 0.645992 | 5.05928  | 1.64442  | 1.73413  |

|                    |          |          |          |          |          |          |
|--------------------|----------|----------|----------|----------|----------|----------|
| ENSACAP00000006715 | 4.52669  | 2.09811  | 1.93615  | 10.3184  | 1.88092  | 0.203462 |
| ENSACAP00000005862 | 17.1196  | 9.6989   | 3206.43  | 12.5415  | 9.47798  | 11.1874  |
| ENSACAP00000007069 | 49.3781  | 0.76221  | 0.364487 | 0.167628 | 0.509868 | 0.110909 |
| ENSACAP00000013440 | 0        | 1.33735  | 0        | 0.000245 | 0        | 0        |
| ENSACAP00000016487 | 4.76603  | 0.334133 | 6.91749  | 0.623123 | 0.891011 | 4.29353  |
| ENSACAP00000006202 | 3.68469  | 1.20167  | 0.920731 | 11.067   | 1.57867  | 0.201623 |
| ENSACAP00000005163 | 0.290782 | 4.33685  | 0.046488 | 6.24966  | 5.28112  | 0.032265 |
| ENSACAP00000000629 | 4.26544  | 2.20495  | 2.40062  | 0.943973 | 3.31964  | 0.039362 |
| ENSACAP00000015558 | 0.143683 | 0.111743 | 0        | 3.45637  | 0.163196 | 0.312603 |
| ENSACAP00000015568 | 8.60326  | 4.49984  | 3.77935  | 2.31108  | 4.94489  | 0.145905 |
| ENSACAP00000001568 | 0.13563  | 0        | 0        | 0        | 2.01009  | 0        |
| ENSACAP00000010445 | 1.21058  | 0.179382 | 0.234453 | 1.61904  | 1.21151  | 0.033197 |
| ENSACAP00000003381 | 13.9756  | 0        | 0        | 0.038358 | 0.059415 | 0        |
| ENSACAP00000009807 | 13.3297  | 0.068541 | 0        | 0.137056 | 0.314834 | 0.357667 |
| ENSACAP00000013183 | 1.54865  | 0.513377 | 0.489512 | 0.260211 | 0.267203 | 0        |
| ENSACAP00000008073 | 0.418081 | 0        | 0.233841 | 0        | 0.375064 | 7.14736  |
| ENSACAP00000007033 | 10.3199  | 1.47178  | 1.23044  | 0.347373 | 24.8587  | 1.99164  |
| ENSACAP00000009489 | 1.08608  | 0        | 0        | 0.386388 | 15.312   | 0.166742 |
| ENSACAP00000002674 | 0.365829 | 0.326133 | 0        | 0.410862 | 0.18672  | 0.176205 |
| ENSACAP00000005541 | 0.218027 | 0.017903 | 0        | 1.68E-10 | 0        | 0.113255 |
| ENSACAP00000011995 | 0.296571 | 0.951746 | 0        | 0        | 0.067476 | 0        |
| ENSACAP00000006658 | 2.83841  | 1.27582  | 0.513216 | 0.109863 | 1.23319  | 0        |
| ENSACAP00000007420 | 4.29783  | 1.5232   | 78.156   | 0.993773 | 1.01875  | 0.780413 |
| ENSACAP00000002456 | 0.432598 | 0.693513 | 0.308927 | 0.088977 | 0.611888 | 0        |
| ENSACAP00000017277 | 0        | 0.220498 | 1.28451  | 0.631969 | 0.647539 | 0        |
| ENSACAP00000008014 | 0.208758 | 0.079853 | 7.40703  | 0.166175 | 0        | 0        |
| ENSACAP00000002400 | 2.27237  | 1.17817  | 0.562765 | 3.1394   | 3.04817  | 0.095745 |
| ENSACAP00000004412 | 0.149346 | 0.771751 | 0.270026 | 0.091784 | 8.30735  | 0.189449 |
| ENSACAP00000011892 | 1.19632  | 0.363686 | 1.42151  | 0        | 1.44838  | 0        |
| ENSACAP00000017999 | 0.039135 | 0.01714  | 0        | 0        | 0.00023  | 0        |
| ENSACAP00000015422 | 0.799238 | 0.175923 | 0.168222 | 0.813519 | 0.456484 | 0.390823 |

|                    |          |          |          |          |          |          |
|--------------------|----------|----------|----------|----------|----------|----------|
| ENSACAP00000005385 | 0.371905 | 0.448707 | 9.56E-09 | 0.010949 | 0.053716 | 0        |
| ENSACAP00000000788 | 0.824095 | 0.926787 | 0.094649 | 0.040018 | 0.340869 | 0        |
| ENSACAP00000002209 | 12.3185  | 3.45293  | 1.29366  | 0.03386  | 3.03289  | 0.040219 |
| ENSACAP00000016915 | 0.652609 | 1.66741  | 0.185736 | 0.027125 | 0.152102 | 0.092617 |
| ENSACAP00000016271 | 0.046593 | 0.056995 | 0.831374 | 0.134078 | 0.362583 | 0.016989 |
| ENSACAP00000003704 | 11.0294  | 0.595163 | 0.260435 | 0.276927 | 0.195615 | 0.161974 |
| ENSACAP00000011394 | 1.60481  | 1.19299  | 0.319894 | 0        | 1.23665  | 0.037745 |
| ENSACAP00000017361 | 0.307894 | 0.430525 | 0        | 0        | 0.18821  | 0        |
| ENSACAP00000002866 | 0.728177 | 0.353143 | 0        | 0.028512 | 0.831583 | 0.163109 |
| ENSACAP00000000239 | 0.752391 | 2.62632  | 0.328705 | 0.033369 | 0.721165 | 0.024411 |
| ENSACAP00000012915 | 8.35055  | 2.3209   | 1.50343  | 0.391227 | 2.51708  | 0.247863 |
| ENSACAP00000015517 | 6.61682  | 4.08947  | 2.04448  | 4.10559  | 1.95394  | 0.148369 |
| ENSACAP00000004157 | 0.145618 | 0.012696 | 0.08585  | 0.00392  | 0.126648 | 0.037658 |
| ENSACAP00000002797 | 0        | 4.33166  | 0.208658 | 0.105235 | 0        | 0.06067  |
| ENSACAP00000022553 | 2.02087  | 1.29785  | 1.64506  | 0.409706 | 1.41792  | 0.046836 |
| ENSACAP00000005969 | 0        | 0        | 0        | 0        | 0        | 0        |
| ENSACAP00000008015 | 3.90326  | 0.953472 | 0        | 0        | 0.435032 | 0.139124 |
| ENSACAP00000002410 | 2.16456  | 1.47425  | 1.33584  | 5.60613  | 1.10581  | 1.11699  |
| ENSACAP00000005184 | 1.78176  | 1.99434  | 2.6605   | 17.2016  | 2.52872  | 0.159433 |
| ENSACAP00000013323 | 11.8355  | 1.18657  | 0.349277 | 4.39654  | 0.087648 | 8.40589  |
| ENSACAP00000002807 | 0        | 0.481755 | 1.1314   | 0.859136 | 0.313515 | 0        |
| ENSACAP00000012886 | 6.69327  | 6.71344  | 30.7381  | 29.0254  | 16.1891  | 3.2124   |
| ENSACAP00000014423 | 1.71278  | 1.97622  | 0        | 0        | 0.629506 | 0        |
| ENSACAP00000011611 | 15.9482  | 14.0076  | 2.88221  | 15.8057  | 14.5527  | 0.776986 |
| ENSACAP00000012569 | 0.637677 | 0.199886 | 0.353109 | 0        | 0.530451 | 0        |
| ENSACAP00000010118 | 19.7382  | 8.4545   | 8.51264  | 0.613575 | 8.56468  | 0        |
| ENSACAP00000000500 | 0        | 0.975036 | 0        | 0.527124 | 0        | 0        |
| ENSACAP00000000706 | 4.30473  | 0.497352 | 1.49563  | 2.42912  | 2.45983  | 2.82654  |
| ENSACAP00000009342 | 7.68283  | 4.56453  | 2.5343   | 5.77276  | 3.35767  | 0.347503 |
| ENSACAP00000007260 | 27.7007  | 7.96761  | 6.83088  | 50.4782  | 23.2254  | 0.478427 |
| ENSACAP00000020775 | 0.449396 | 0.901306 | 0.205576 | 1.04236  | 0.168364 | 0.045676 |

|                    |          |          |          |          |          |          |
|--------------------|----------|----------|----------|----------|----------|----------|
| ENSACAP0000001690  | 12.1884  | 13.0505  | 24.5334  | 0.678544 | 11.9357  | 1.21979  |
| ENSACAP00000016626 | 0.431373 | 0.161645 | 0.061022 | 1.74502  | 1.74E-10 | 9.96E-11 |
| ENSACAP00000009930 | 5.26691  | 3.46419  | 4.21331  | 0.685732 | 2.27293  | 0.268343 |
| ENSACAP00000016567 | 0.22796  | 0.241037 | 0.077889 | 0.030715 | 0        | 0        |
| ENSACAP00000012479 | 1.47493  | 0.114557 | 0.275873 | 7.20108  | 0.811249 | 2.06117  |
| ENSACAP00000009994 | 198.396  | 0.148974 | 0        | 0.284509 | 0.789206 | 0.739157 |
| ENSACAP00000008780 | 1.4613   | 0.718679 | 0        | 0        | 0        | 0        |
| ENSACAP00000016408 | 7.50626  | 0.024582 | 0.017679 | 0.013566 | 0.010344 | 0.008083 |
| ENSACAP00000017268 | 1.03736  | 0.217934 | 0        | 0        | 0.092638 | 1.65E-09 |
| ENSACAP00000014686 | 9.35618  | 2.56789  | 3.32527  | 1.18396  | 6.91097  | 1.3252   |
| ENSACAP00000009688 | 0.436427 | 0.722924 | 0.116094 | 0.170955 | 0.085451 | 0.636182 |
| ENSACAP00000008584 | 0.468792 | 0        | 0        | 0        | 0.037142 | 0        |
| ENSACAP00000006912 | 0        | 0.138013 | 0.085309 | 0.309729 | 0        | 0        |
| ENSACAP00000003827 | 0.353765 | 0.489374 | 0.654805 | 0.308565 | 0.459626 | 0.056409 |
| ENSACAP00000016036 | 0.533875 | 0.555835 | 0.531611 | 0.320492 | 3.06856  | 0.129455 |
| ENSACAP00000000414 | 0.328858 | 0        | 0        | 0        | 0        | 0.038868 |
| ENSACAP00000009531 | 0.935357 | 1.40874  | 1.37912  | 0        | 0.304804 | 0.217536 |
| ENSACAP00000008343 | 1.67346  | 2.74156  | 0.128785 | 0.078811 | 0.299101 | 0.23189  |
| ENSACAP00000004578 | 2000.68  | 1119.72  | 11647.5  | 688.544  | 6514.8   | 550.187  |
| ENSACAP00000016804 | 6.70211  | 0.250336 | 1.77743  | 0        | 13.8678  | 0.044388 |
| ENSACAP00000009262 | 10.1102  | 7.04539  | 4.74557  | 0        | 6.47772  | 72.1353  |
| ENSACAP00000015113 | 1.31437  | 6.98134  | 0.212604 | 0        | 1.12173  | 0.423336 |
| ENSACAP00000002886 | 0.542978 | 0        | 0        | 0.162678 | 0.209443 | 0        |
| ENSACAP00000004101 | 0        | 0        | 0        | 0        | 0        | 0        |
| ENSACAP00000000477 | 144.697  | 70.0479  | 81.8811  | 2.92159  | 47.4656  | 1.10098  |
| ENSACAP00000015428 | 0.694046 | 0.092394 | 0.197601 | 0        | 1.49214  | 0.029049 |
| ENSACAP00000016608 | 22.0743  | 26.1483  | 0.000996 | 0.001972 | 0        | 0        |
| ENSACAP00000004923 | 0.192404 | 1.3446   | 5.70321  | 0.607304 | 1.58097  | 0.796044 |
| ENSACAP00000008971 | 12.5158  | 8.75003  | 26.2686  | 9.03685  | 23.1237  | 1.17719  |
| ENSACAP00000001566 | 3.58382  | 5.80327  | 2.35342  | 21.6192  | 1.48779  | 0.496515 |
| ENSACAP00000011610 | 10.2448  | 1.52935  | 0        | 10.4988  | 2.45094  | 0        |

|                    |          |          |          |          |          |          |        |
|--------------------|----------|----------|----------|----------|----------|----------|--------|
| ENSACAP00000006749 | 0        | 1.21057  | 0.579422 | 0.850638 | 0        | 1.02895  |        |
| ENSACAP00000008830 | 0.718456 | 0.54676  | 0        | 0.506822 | 0        | 0.053077 |        |
| ENSACAP00000002155 | 3.10382  | 0.494829 | 0        | 0.384788 | 4.79934  | 7.46E-06 |        |
| ENSACAP00000011104 | 1543.83  | 1548.11  | 2453.48  | 304.078  | 2627.63  | 502.296  |        |
| ENSACAP00000012138 | 3.24544  | 1.65783  | 8063.88  | 5.31195  | 3.91195  | 18.3158  |        |
| ENSACAP00000005351 | 156.682  | 568.847  | 102.329  | 88.5355  | 76.4261  | 164.227  |        |
| ENSACAP00000009815 | 117.054  | 779.23   | 160.308  | 4.84771  | 32.7312  | 15.1656  |        |
| ENSACAP00000013733 | 251.895  | 259.335  | 222.694  | 151.032  | 171.751  | 17.7698  |        |
| ENSACAP00000020514 | 70.3664  | 11.9585  | 282.195  | 192.37   | 14.4516  | 67.6062  |        |
| ENSACAP00000001812 | 220.254  | 41.1605  | 31.8313  | 164.616  | 40.9809  | 23.8003  |        |
| ENSACAP00000016905 | 10.7223  | 27.1383  | 39.9283  | 1.09994  | 11.1827  | 5.22945  |        |
| ENSACAP00000016867 | 59.6287  | 74.803   | 55.91    | 128.456  | 49.1186  | 13.8621  |        |
| ENSACAP00000010793 | 13.2595  | 39.8955  | 164.771  | 2.38864  | 21.0927  | 236.58   |        |
| ENSACAP00000012413 | 353.57   | 0.572318 | 1.39805  | 6.91032  | 5.16183  | 2.43066  |        |
| ENSACAP00000004411 | 0.218271 | 0.059437 | 248.724  | 0.813031 | 0.210012 | 0.69278  |        |
| ENSACAP00000017693 | 57.8141  | 25.5225  | 17.4719  | 140.797  | 17.3018  | 44.6697  |        |
| ENSACAP00000013201 | 2.48248  | 6.49492  | 10.2652  | 0.250875 | 2.27658  | 1.10913  |        |
| ENSACAP00000004505 | 25.3356  | 85.9242  | 0.034864 | 0.058284 | 0.045193 | 0.080753 |        |
| ENSACAP00000000405 | 24.1265  | 40.5663  | 14.6623  | 10.4226  | 12.6958  | 14.694   |        |
| ENSACAP00000016795 | 27.917   | 15.3637  | 17.2256  | 34.8111  | 22.2396  | 4.17924  |        |
| ENSACAP00000008355 | 61.4127  | 7.90423  | 19.0515  | 13.9905  | 1.09042  | 0.171779 |        |
| ENSACAP00000008948 | 6.79869  | 9.39945  | 22.0572  | 7.30162  | 74.705   | 0.820424 |        |
| ENSACAP00000014346 | 0.873208 | 63.5887  | 0.297328 | 0.138297 | 0.317645 | 0.072133 |        |
| ENSACAP00000011281 | 2.14008  | 41.7082  | 4.34069  | 0        | 0.410859 | 0.493043 |        |
| ENSACAP00000000334 | 31.5842  | 29.3463  | 7.1074   | 54.0222  | 16.0159  | 9.36212  |        |
| ENSACAP00000014695 | 24.6374  | 0.121134 | 0.084092 | 0        | 0        | 0.039755 |        |
| ENSACAP00000015991 | 0.676248 | 2.54647  | 0.745035 | 3.59794  | 1.91929  | 0        |        |
| ENSACAP00000005039 | 0.551889 | 0.481769 | 0        | 0        | 0.047515 | 0.033476 |        |
| ENSACAP00000017455 | 1.96165  | 0.330607 | 0        | 0        | 0.264995 | 0.177803 |        |
| <i>N. liebigii</i> | PSGs     | brain    | heart    | liver    | ovary    | skin     | testis |
| ENSACAP00000003454 | 0.266183 | 0.685454 | 0.828295 | 3.73869  | 1.95209  | 1.32725  |        |

|                    |          |          |          |          |          |          |
|--------------------|----------|----------|----------|----------|----------|----------|
| ENSACAP0000006211  | 1.32933  | 0.966089 | 0.263072 | 0.0947   | 0.616052 | 0.041628 |
| ENSACAP0000001640  | 2.33889  | 1.48507  | 3.06346  | 0.079166 | 1.53379  | 4.9713   |
| ENSACAP00000021152 | 0        | 0        | 0        | 0        | 1.04336  | 0.246602 |
| ENSACAP00000012316 | 0        | 14.6191  | 0.074472 | 0.313691 | 0.298832 | 0.103792 |
| ENSACAP00000017289 | 0.12164  | 15.2366  | 0        | 0.597922 | 0        | 5.66767  |
| ENSACAP00000003556 | 8.35489  | 9.38121  | 5.74669  | 1.68118  | 8.5574   | 28.4791  |
| ENSACAP00000017197 | 12.1652  | 0.05067  | 0        | 0        | 0.214977 | 0.033027 |
| ENSACAP00000011692 | 4.06054  | 8.48616  | 2.24533  | 0        | 15.594   | 4.09017  |
| ENSACAP00000008759 | 4.49081  | 0        | 0        | 1.34674  | 0        | 1.36451  |
| ENSACAP00000004168 | 2.57202  | 0.021218 | 0.032384 | 0.189579 | 0.064881 | 46.8124  |
| ENSACAP00000012758 | 1.56684  | 0.250761 | 0.4662   | 0.699555 | 11.2846  | 0.581654 |
| ENSACAP00000015527 | 2.83408  | 0.446913 | 0        | 0        | 1.23825  | 0.159888 |
| ENSACAP00000019308 | 4.15761  | 0        | 0.718295 | 0        | 0        | 0.283045 |
| ENSACAP00000005737 | 0        | 0        | 0        | 0        | 8.95742  | 0        |
| ENSACAP00000013484 | 5.9664   | 0        | 0        | 0        | 0        | 0.027587 |
| ENSACAP00000010921 | 0.532367 | 2.39909  | 0        | 0.467336 | 0.557739 | 1.89608  |
| ENSACAP00000003808 | 1.36901  | 1.80536  | 0.567594 | 0        | 0.860163 | 1.19012  |
| ENSACAP00000014660 | 1.18859  | 1.13745  | 0.355471 | 0.232322 | 0.894635 | 0.396302 |
| ENSACAP00000023366 | 0        | 2.06803  | 0.555689 | 0        | 0.139667 | 0.072037 |
| ENSACAP00000007427 | 1.88439  | 1.33131  | 0        | 0        | 0.680276 | 45.4007  |
| ENSACAP00000012912 | 0.876594 | 1.21238  | 0.302342 | 1.66084  | 1.83391  | 0.438723 |
| ENSACAP00000004437 | 16.1931  | 13.0443  | 13.5672  | 37.5409  | 113.57   | 11.1587  |
| ENSACAP00000003421 | 0.981879 | 0.148913 | 0.310045 | 0.16732  | 0        | 0        |
| ENSACAP00000014191 | 147.853  | 33.8432  | 13.4588  | 31.0318  | 29.502   | 13.7453  |
| ENSACAP00000001426 | 5.01577  | 9.1591   | 1.78994  | 78.2655  | 3.44162  | 8.5046   |
| ENSACAP00000016437 | 4.35289  | 1.63657  | 0.576587 | 11.4032  | 0.800071 | 4.28327  |
| ENSACAP00000008175 | 1.2338   | 0        | 8.04236  | 0        | 0.260739 | 0        |
| ENSACAP00000012975 | 1.16449  | 1.11619  | 0        | 1.13331  | 0.136668 | 0.140246 |
| ENSACAP00000007762 | 14.4037  | 0.091575 | 0.065382 | 0        | 0.196709 | 0.179614 |
| ENSACAP00000001322 | 1.08462  | 0.712807 | 0.162419 | 0        | 0        | 0        |
| ENSACAP00000017267 | 0        | 1.16692  | 0        | 0        | 0        | 0        |

|                    |          |          |          |          |          |          |
|--------------------|----------|----------|----------|----------|----------|----------|
| ENSACAP00000011214 | 8.19183  | 7.8181   | 0.918891 | 6.59455  | 1.97472  | 9.53017  |
| ENSACAP00000010531 | 0        | 0        | 0        | 0        | 1.70056  | 0        |
| ENSACAP00000006716 | 0.258688 | 1.14425  | 0.363933 | 0.889955 | 0.365288 | 0.477697 |
| ENSACAP00000001376 | 0.231415 | 1.8591   | 0.963289 | 0        | 1.94357  | 1.06936  |
| ENSACAP00000002517 | 1.42639  | 0.144983 | 0.47987  | 0        | 1.1001   | 0.031546 |
| ENSACAP00000007089 | 27.572   | 0.311217 | 0.254356 | 0        | 0.050992 | 0.182122 |
| ENSACAP00000006179 | 0.80252  | 0.898645 | 0.044625 | 4.55089  | 0.983877 | 4.56578  |
| ENSACAP00000001781 | 1.35076  | 0.681828 | 0.31479  | 82.4915  | 1.10838  | 11.2285  |
| ENSACAP00000015442 | 0.896502 | 0.374938 | 0.233079 | 3.51317  | 0.116846 | 5.00988  |
| ENSACAP00000004656 | 0.770194 | 2.02172  | 0.851005 | 4.39372  | 0        | 10.7339  |
| ENSACAP00000014487 | 2.26112  | 5.52174  | 0.276558 | 3.78229  | 1.61493  | 0.746824 |
| ENSACAP00000011904 | 5.24044  | 0.356357 | 0.188956 | 2.02902  | 0        | 0.322968 |
| ENSACAP00000013319 | 3.26861  | 2.12499  | 1.65777  | 1.71993  | 5.10099  | 60.051   |
| ENSACAP00000010282 | 1.01047  | 0.726071 | 0.096872 | 0        | 0.194505 | 0.046695 |
| ENSACAP00000004589 | 0.311781 | 0.033336 | 0.034908 | 0.863034 | 0.087379 | 1.17285  |
| ENSACAP00000000349 | 0.825333 | 0.593671 | 0.248049 | 0        | 0.623132 | 0.125267 |
| ENSACAP00000002674 | 0        | 0        | 0        | 0.157034 | 5.87156  | 0.476611 |
| ENSACAP00000012408 | 0.653807 | 5.89288  | 0.64805  | 0.187885 | 0.408649 | 0.180112 |
| ENSACAP00000000518 | 1.20614  | 0.254402 | 0.106424 | 17.0794  | 1.28023  | 8.74749  |
| ENSACAP00000007369 | 0.663283 | 1.11606  | 0        | 0        | 0.382301 | 0.567228 |
| ENSACAP00000009283 | 0.235212 | 0.067594 | 5.82954  | 0.050141 | 0.049942 | 0.044591 |
| ENSACAP00000013273 | 0.754632 | 0.873249 | 0        | 0.05394  | 0.42719  | 0.693893 |
| ENSACAP00000004258 | 42.0706  | 21.3797  | 1.13968  | 19.4101  | 3.89462  | 1.62514  |
| ENSACAP00000002920 | 4.23399  | 3.20966  | 1.96391  | 19.8896  | 3.13314  | 34.2646  |
| ENSACAP00000010338 | 1.49398  | 1.60648  | 0.248649 | 0.160395 | 0.240981 | 2.39406  |
| ENSACAP00000013115 | 8.31588  | 12.3781  | 1.32572  | 68.9719  | 3.91913  | 46.8089  |
| ENSACAP00000017196 | 13.4616  | 14.4552  | 1.23598  | 1.1147   | 50.5557  | 4.56289  |
| ENSACAP00000006254 | 20.1543  | 2.89957  | 0.913997 | 8.80339  | 2.13525  | 9.33246  |
| ENSACAP00000005552 | 1.98128  | 0.385357 | 0        | 2.913    | 0        | 0.222714 |
| ENSACAP00000017624 | 0.061406 | 0.021348 | 0.032571 | 0.063578 | 39.2838  | 0.637661 |
| ENSACAP00000022968 | 0.132547 | 0.148647 | 0.070063 | 0.146344 | 114.336  | 0.614058 |



|                    |          |          |          |          |          |          |
|--------------------|----------|----------|----------|----------|----------|----------|
| ENSACAP00000009090 | 39.8214  | 0        | 0        | 0.754531 | 0.100178 | 0.066994 |
| ENSACAP00000014676 | 96.5556  | 2.77333  | 3.13224  | 0.302149 | 6.44141  | 15.145   |
| ENSACAP00000007659 | 25.0874  | 0.337319 | 0        | 1.06676  | 0.018896 | 0.064344 |
| ENSACAP00000006856 | 0        | 6.62515  | 0.495297 | 0        | 0        | 0.01332  |
| ENSACAP00000008138 | 1.88801  | 0.917134 | 0.233803 | 1.33791  | 0.469762 | 12.4778  |
| ENSACAP00000020455 | 0.447334 | 0.339649 | 0        | 3.77521  | 0.209255 | 0.254291 |
| ENSACAP00000010279 | 1.83227  | 2.47876  | 0.602501 | 13.4765  | 1.2107   | 2.72158  |
| ENSACAP00000012746 | 2.47237  | 1.5233   | 0.093148 | 0.101665 | 1.77654  | 0.223104 |
| ENSACAP00000007591 | 3.18224  | 0        | 0        | 0        | 0.177715 | 155.237  |
| ENSACAP00000008790 | 0.249331 | 0.983094 | 0        | 0        | 1.32499  | 0        |
| ENSACAP00000009390 | 8.01916  | 0        | 0        | 0        | 0.611537 | 0.381872 |
| ENSACAP00000017850 | 6.79103  | 1.13267  | 0.548469 | 0.705779 | 0.549307 | 0.157533 |
| ENSACAP00000019934 | 13.3692  | 25.3582  | 0.406854 | 15.0057  | 3.98833  | 0.713385 |
| ENSACAP00000006621 | 4.68859  | 2.32619  | 0.225587 | 5.22654  | 0.339249 | 262.369  |
| ENSACAP00000017518 | 8.0436   | 0.940963 | 0.600384 | 27.8692  | 3.18471  | 4.22103  |
| ENSACAP00000003909 | 0.643692 | 0.900777 | 0.035929 | 0.740733 | 0.179977 | 0.062845 |
| ENSACAP00000008105 | 11.8366  | 0.151014 | 0        | 0        | 0        | 1.27034  |
| ENSACAP00000002413 | 1.15949  | 0        | 0        | 3.24197  | 0        | 0.110205 |
| ENSACAP00000016946 | 0.187066 | 1.87771  | 0.195489 | 0.266568 | 0.196916 | 1.80525  |
| ENSACAP00000005858 | 2.47378  | 1.72308  | 0        | 0.245675 | 2.04733  | 0.208924 |
| ENSACAP00000016873 | 4.34186  | 0.7548   | 0        | 0        | 0.109369 | 0.10714  |
| ENSACAP00000001874 | 1.14002  | 1.5534   | 0.176395 | 0.466937 | 1.10072  | 0.451445 |
| ENSACAP00000013732 | 0.926673 | 0.851501 | 0.161902 | 0        | 1.46609  | 1.13848  |
| ENSACAP00000011794 | 0        | 1.17272  | 0        | 0        | 0.792623 | 0        |
| ENSACAP00000021556 | 15.167   | 1.96028  | 2.76674  | 0        | 6.40424  | 8.1599   |
| ENSACAP00000009821 | 0.498977 | 0        | 0        | 0        | 0.085352 | 104.439  |
| ENSACAP00000011325 | 0.518194 | 0.707865 | 0.208263 | 0        | 1.33935  | 0.157411 |
| ENSACAP00000008624 | 8.87893  | 6.92444  | 0.300126 | 16.6678  | 1.70471  | 7.42189  |
| ENSACAP00000023204 | 0        | 0.536233 | 0        | 0        | 0.547498 | 28.9969  |
| ENSACAP00000011882 | 0.503522 | 1.72627  | 0.345666 | 0.244868 | 1.00729  | 0.436725 |
| ENSACAP00000014718 | 3.76819  | 5.37726  | 1.34562  | 7.03879  | 3.26243  | 10.6949  |

|                    |          |          |          |          |          |          |
|--------------------|----------|----------|----------|----------|----------|----------|
| ENSACAP00000007993 | 72.3424  | 13.0164  | 0        | 0        | 0        | 80.9335  |
| ENSACAP00000014901 | 0.49301  | 2.44425  | 2.89039  | 21.9015  | 1.40534  | 4.74138  |
| ENSACAP00000022522 | 3.47348  | 0.896001 | 0.281397 | 4.46952  | 0.873724 | 2.35915  |
| ENSACAP00000013933 | 28.0465  | 34.9114  | 4.47756  | 21.6241  | 12.9686  | 63.9758  |
| ENSACAP00000001930 | 30.1116  | 37.9904  | 5.75202  | 9.14935  | 9.36182  | 130.606  |
| ENSACAP00000019740 | 13.6171  | 1.31045  | 0        | 0.228724 | 1.9729   | 6.88899  |
| ENSACAP00000004162 | 2.85052  | 0        | 0.729408 | 0.561462 | 1.33227  | 9.16213  |
| ENSACAP00000005395 | 0.811147 | 0.00892  | 0        | 0        | 0.114522 | 0        |
| ENSACAP00000008336 | 1.13343  | 1.69264  | 0        | 0        | 0        | 3.9625   |
| ENSACAP00000001501 | 1.04461  | 1.55451  | 0        | 0        | 2.53752  | 0.342813 |
| ENSACAP00000003727 | 2.72084  | 0.554594 | 0.675899 | 1.08815  | 1.44132  | 1.63574  |
| ENSACAP00000009938 | 1.66965  | 20.1282  | 1.88068  | 14.3356  | 5.84649  | 9.2685   |
| ENSACAP00000005181 | 2.83089  | 22.2892  | 0.421561 | 15.6599  | 72.6909  | 27.8752  |
| ENSACAP00000015231 | 1.14164  | 14.7352  | 0.056342 | 6.34803  | 21.4168  | 8.67999  |
| ENSACAP00000007502 | 53.2306  | 4.57071  | 0.488714 | 17.393   | 9.54044  | 18.6195  |
| ENSACAP00000006629 | 2.61377  | 4.41173  | 2.44418  | 1.57091  | 0        | 0.464372 |
| ENSACAP00000007083 | 0.842464 | 1.49058  | 0.150636 | 0.374798 | 1.23866  | 6.7609   |
| ENSACAP00000005635 | 2.48506  | 0        | 0        | 0        | 0        | 0        |
| ENSACAP00000011533 | 45.1539  | 44.4983  | 2.65229  | 15.1378  | 26.9485  | 50.4645  |
| ENSACAP00000004222 | 3.11933  | 16.7518  | 1.28179  | 11.6942  | 2.00481  | 7.65491  |
| ENSACAP00000001618 | 1.13156  | 0.55349  | 0.120937 | 0.375004 | 0.169127 | 0.448026 |
| ENSACAP00000008500 | 0.23914  | 1.40788  | 1.40401  | 0.151323 | 1.34341  | 1.1374   |
| ENSACAP00000001626 | 5.95445  | 11.855   | 1.55601  | 0.988661 | 8.22966  | 2.42746  |
| ENSACAP00000003146 | 0        | 0.230323 | 0        | 0        | 0.004281 | 726.855  |
| ENSACAP00000017421 | 0.827091 | 1.14894  | 0.922435 | 4.84119  | 2.03385  | 2.08975  |
| ENSACAP00000020588 | 18.2177  | 2.22827  | 0.132137 | 0.659059 | 1.44071  | 1.13163  |
| ENSACAP00000015300 | 0        | 1.25234  | 0.396014 | 1.13916  | 0.249013 | 0.390554 |
| ENSACAP00000001315 | 0.553394 | 1.99276  | 0.154074 | 0        | 0.221772 | 0.527526 |
| ENSACAP00000006476 | 1.00009  | 1.55841  | 2.60265  | 0.431297 | 0        | 1.25856  |
| ENSACAP00000016107 | 0.359059 | 1.33376  | 0        | 0        | 1.59569  | 14.8542  |
| ENSACAP00000006923 | 0.224309 | 0.271751 | 1.30E-09 | 0.698504 | 0.041889 | 1.28E-10 |

|                    |          |          |          |          |          |          |
|--------------------|----------|----------|----------|----------|----------|----------|
| ENSACAP00000011215 | 1.89431  | 8.33863  | 1.6751   | 7.83639  | 1.30037  | 9.41408  |
| ENSACAP00000016350 | 1.42865  | 1.10044  | 0.432593 | 0.516295 | 0.563561 | 2.98447  |
| ENSACAP00000015816 | 8.40187  | 2.00197  | 0.354919 | 0        | 4.29819  | 5.34192  |
| ENSACAP00000009331 | 1.84668  | 5.02908  | 0.973197 | 27.1141  | 13.8375  | 8.3768   |
| ENSACAP00000010371 | 0.44544  | 0        | 0        | 0.11501  | 0        | 0        |
| ENSACAP00000002201 | 0.209895 | 2.27793  | 0.527094 | 0.751583 | 1.17655  | 2.98747  |
| ENSACAP00000020914 | 0.001636 | 0.071342 | 0        | 0        | 0        | 0.011376 |
| ENSACAP00000015408 | 47.6232  | 138.387  | 12.8434  | 7.86327  | 22.2878  | 10.1269  |
| ENSACAP00000013711 | 0.275285 | 0.201968 | 2.36952  | 0        | 0        | 0        |
| ENSACAP00000016151 | 2.40468  | 2.24493  | 1.36521  | 5.80511  | 6.20941  | 2.49447  |
| ENSACAP00000012725 | 5.2431   | 0.48189  | 0.020445 | 3.6663   | 0.877043 | 0        |
| ENSACAP00000000034 | 4.16095  | 0.033544 | 0        | 0.248846 | 0        | 0        |
| ENSACAP00000008386 | 0        | 51.3864  | 0        | 0        | 0        | 0.800515 |
| ENSACAP00000009392 | 2.08782  | 6.93995  | 0.443473 | 6.48936  | 11.7676  | 2.8663   |
| ENSACAP00000010681 | 19.6024  | 13.8624  | 2.16012  | 7.9502   | 7.52763  | 2.07973  |
| ENSACAP00000006513 | 13.9838  | 4.82147  | 0        | 3.59771  | 0.666072 | 0.115854 |
| ENSACAP00000010797 | 0        | 0.327511 | 0        | 1.15964  | 1.03095  | 0.790484 |
| ENSACAP00000015971 | 0.418821 | 1.19239  | 0.171088 | 0.389113 | 0.393413 | 0.068593 |
| ENSACAP00000016767 | 0        | 0.979887 | 0        | 0.555163 | 1.61915  | 0.117206 |
| ENSACAP00000001116 | 1.32365  | 2.5387   | 1.22992  | 0.170832 | 0.259788 | 5.8258   |
| ENSACAP00000017256 | 17.1447  | 9.73716  | 1.35514  | 5.98499  | 5.92116  | 73.5414  |
| ENSACAP00000005783 | 0.050145 | 0.667203 | 0.529229 | 1.13098  | 0        | 4.33375  |
| ENSACAP00000016382 | 25.1128  | 55.5498  | 5.4524   | 21.9472  | 14.3925  | 58.3356  |
| ENSACAP00000013656 | 0.024788 | 0.084206 | 0.184124 | 0.319261 | 0        | 0        |
| ENSACAP00000014179 | 2.69843  | 0        | 0        | 0        | 0        | 0.045021 |
| ENSACAP00000003596 | 1.31063  | 2.8874   | 0.77356  | 5.67037  | 1.71567  | 0.512756 |
| ENSACAP00000002125 | 0.935329 | 3.19211  | 0.390978 | 1.59941  | 0.590749 | 0.225656 |
| ENSACAP00000003548 | 8.84893  | 5.28322  | 1.45297  | 20.1786  | 2.6991   | 41.2479  |
| ENSACAP00000000381 | 0.129967 | 0.212782 | 0.357488 | 0        | 1.03677  | 0.034877 |
| ENSACAP00000016789 | 0.613099 | 0        | 16.6179  | 0.560514 | 0.211505 | 2.80681  |
| ENSACAP00000005833 | 1.64882  | 0.329944 | 0        | 0        | 0.374513 | 0.022089 |

|                    |          |          |          |          |          |          |
|--------------------|----------|----------|----------|----------|----------|----------|
| ENSACAP00000010744 | 0.551446 | 0.376444 | 0.870816 | 0        | 0.879981 | 0        |
| ENSACAP00000022448 | 2.90188  | 0        | 0        | 0        | 0.478706 | 0        |
| ENSACAP00000014119 | 2.26007  | 5.55008  | 0.758714 | 0.473781 | 2.04062  | 3.44363  |
| ENSACAP00000011394 | 0.567972 | 2.4629   | 0.786923 | 0.833188 | 1.11342  | 3.90785  |
| ENSACAP00000015556 | 4.5685   | 0        | 0.11541  | 1.92413  | 0.103425 | 0.705227 |
| ENSACAP00000008887 | 0.529507 | 0.214234 | 0.556008 | 0        | 0.297337 | 0        |
| ENSACAP00000004628 | 0.099343 | 0.677797 | 0.765977 | 0.094966 | 0        | 0.413803 |
| ENSACAP00000009915 | 1.26647  | 145.865  | 7.98651  | 3.30877  | 2.00693  | 3.75692  |
| ENSACAP00000013931 | 14.3083  | 9.85741  | 0.562828 | 5.51367  | 1.0585   | 166.821  |
| ENSACAP00000001168 | 2.54217  | 0.341677 | 0        | 1.00157  | 0.356597 | 0.085523 |
| ENSACAP00000005291 | 0        | 0        | 0        | 0.143601 | 0.497288 | 2.41104  |
| ENSACAP00000018579 | 0        | 0        | 0        | 0.335121 | 0.001927 | 0.000211 |
| ENSACAP00000005187 | 1.48264  | 0        | 5.54E-10 | 0.069779 | 0.164286 | 1.45238  |
| ENSACAP00000011800 | 0.370531 | 2.76627  | 0.451371 | 0        | 0.415916 | 17.1874  |
| ENSACAP00000012790 | 0        | 0.648328 | 0        | 0        | 0        | 0        |
| ENSACAP00000001055 | 0        | 1.87485  | 0        | 0        | 0        | 0        |
| ENSACAP00000005729 | 3.30676  | 2.99955  | 0.238371 | 31.1226  | 2.1492   | 6.51852  |
| ENSACAP00000011523 | 0        | 0        | 0        | 0        | 0        | 0        |
| ENSACAP00000003040 | 0.507871 | 0        | 0        | 0        | 0        | 0        |
| ENSACAP00000011731 | 3.79771  | 1.44131  | 0.043597 | 8.35291  | 0.392917 | 0.821124 |
| ENSACAP00000007417 | 0        | 1.20372  | 0.090893 | 0        | 0.619447 | 0        |
| ENSACAP00000012511 | 4.75547  | 1.92722  | 0        | 0        | 0        | 0.753326 |
| ENSACAP00000003369 | 12.9471  | 3.98945  | 0.822968 | 5.75742  | 7.00862  | 1.13126  |
| ENSACAP00000002283 | 1.13853  | 1.46044  | 0.389957 | 0.255344 | 0        | 0.096592 |
| ENSACAP00000004136 | 0        | 0.231613 | 0        | 0        | 0.313793 | 0        |
| ENSACAP00000010518 | 0        | 2.14329  | 0.43998  | 0        | 0        | 4.37642  |
| ENSACAP00000003286 | 7.10E-05 | 0.381428 | 0        | 0.194494 | 0.262774 | 0.091975 |
| ENSACAP00000005716 | 0.611773 | 0.572151 | 0        | 0        | 0        | 0        |
| ENSACAP00000017354 | 5.78033  | 2.74417  | 0.792558 | 3.69764  | 4.94176  | 9.21183  |
| ENSACAP00000006083 | 5.39889  | 6.98139  | 0.630887 | 1.0304   | 6.59354  | 3.58188  |
| ENSACAP00000016123 | 0.979245 | 1.44139  | 0.975958 | 0.39869  | 1.32453  | 0.136742 |

|                    |          |          |          |          |          |          |
|--------------------|----------|----------|----------|----------|----------|----------|
| ENSACAP00000010465 | 1.53302  | 0        | 0        | 0        | 0.210778 | 0        |
| ENSACAP00000012411 | 0.14231  | 0.824662 | 0.079454 | 0.273382 | 0        | 1.78725  |
| ENSACAP00000016793 | 5.28016  | 3.6569   | 55.5922  | 5.46309  | 1.46942  | 6.28663  |
| ENSACAP00000004825 | 0.522424 | 0        | 0.078673 | 0.02112  | 0.144524 | 7.98E-06 |
| ENSACAP00000000050 | 0.52559  | 1.32716  | 0.39246  | 0        | 1.30741  | 5.07438  |
| ENSACAP00000003057 | 0.277977 | 0.03242  | 0        | 0.051292 | 0        | 0        |
| ENSACAP00000008168 | 0.018553 | 6.33726  | 0.03941  | 0.018809 | 0.118385 | 0.100902 |
| ENSACAP00000001158 | 2.07765  | 1.73731  | 0.408567 | 0.392047 | 0.113649 | 24.0595  |
| ENSACAP00000005278 | 16.0177  | 10.1018  | 4.70483  | 20.315   | 11.1804  | 32.864   |
| ENSACAP00000007849 | 1.41294  | 1.1301   | 0        | 0        | 0        | 4.5566   |
| ENSACAP00000010018 | 5.08199  | 2.71158  | 0        | 0.415157 | 0.415544 | 11.3322  |
| ENSACAP00000015658 | 2.25101  | 73.5154  | 70.7652  | 89.7598  | 6.08076  | 7.60695  |
| ENSACAP00000017480 | 7.81629  | 5.73074  | 9.0784   | 2.56647  | 4.28171  | 2.71079  |
| ENSACAP00000012559 | 7.07897  | 8.33631  | 0.352225 | 6.9941   | 2.77401  | 13.8364  |
| ENSACAP00000011080 | 2.04986  | 7.94324  | 1.14126  | 0.444383 | 3.31327  | 4.89073  |
| ENSACAP00000020529 | 131.958  | 82.8701  | 59.6026  | 31.0688  | 82.6547  | 47.2933  |
| ENSACAP00000017077 | 1.47675  | 2.50925  | 0        | 0        | 0.520146 | 0.263839 |
| ENSACAP00000008228 | 0.423443 | 0.399017 | 0.770598 | 0        | 1.68178  | 0        |
| ENSACAP00000009344 | 3.96136  | 18.2874  | 7.51881  | 5.46428  | 30.7775  | 3.88035  |
| ENSACAP00000004582 | 0.209896 | 0        | 0        | 0        | 0        | 0        |
| ENSACAP00000007335 | 0        | 0        | 0.025517 | 0        | 0.130998 | 0.021972 |
| ENSACAP00000022907 | 4.53692  | 0.049322 | 0        | 0        | 0.34242  | 0.37789  |
| ENSACAP00000017554 | 0        | 0.109053 | 0.263017 | 0        | 0.229811 | 0        |
| ENSACAP00000004644 | 3.07656  | 1.54831  | 4.52927  | 6.5923   | 25.6479  | 6.4782   |
| ENSACAP00000016408 | 33.6859  | 28.2422  | 6.69787  | 15.0017  | 21.3416  | 40.198   |
| ENSACAP00000001445 | 1.24353  | 2.37899  | 1.1199   | 0.475968 | 2.65323  | 7.24376  |
| ENSACAP00000005126 | 0        | 0        | 0        | 0.160568 | 0.677084 | 0.086562 |
| ENSACAP00000014168 | 6.90809  | 2.11096  | 1.31426  | 4.33571  | 4.03697  | 2.42718  |
| ENSACAP00000016779 | 2.26456  | 5.09071  | 1.10904  | 4.53967  | 0.666232 | 0.326344 |
| ENSACAP00000009546 | 6.10165  | 4.51159  | 1.43156  | 4.79819  | 1.23972  | 12.1944  |
| ENSACAP00000011041 | 8.66468  | 1.68325  | 0.052025 | 0.122743 | 0.390606 | 0.769309 |

|                    |          |          |          |          |          |          |
|--------------------|----------|----------|----------|----------|----------|----------|
| ENSACAP00000013311 | 0.581787 | 0.507003 | 0.05631  | 0.138234 | 0.448594 | 0.094874 |
| ENSACAP00000014251 | 0        | 2.91367  | 0        | 0.599163 | 0.752444 | 0.383923 |
| ENSACAP00000005764 | 1.96652  | 0.554304 | 0.06589  | 0        | 0        | 0        |
| ENSACAP00000008060 | 0        | 0.40544  | 0.000234 | 0.000171 | 1.39436  | 0.23488  |
| ENSACAP00000001885 | 0.00761  | 2.89E-07 | 6.79E-08 | 8.18E-07 | 1.65189  | 0.1073   |
| ENSACAP00000009299 | 16.3564  | 54.7343  | 2.45018  | 2.77417  | 12.2657  | 52.2824  |
| ENSACAP00000012577 | 3.1799   | 3.99629  | 0.295515 | 0        | 1.11658  | 0.476356 |
| ENSACAP00000012479 | 21.1347  | 13.2958  | 4.69455  | 5.27844  | 16.005   | 16.7149  |
| ENSACAP00000002239 | 0.355237 | 8.8044   | 2.70382  | 10.1785  | 23.5026  | 6.86397  |
| ENSACAP00000000442 | 0.239004 | 0.887198 | 0        | 0        | 0.710483 | 0        |
| ENSACAP00000006222 | 1.0604   | 1.7125   | 0.617101 | 0        | 0.539153 | 0.406012 |
| ENSACAP00000002650 | 18.1303  | 0.084092 | 0        | 0        | 0        | 0.859301 |
| ENSACAP00000008354 | 0.187241 | 0        | 0        | 0        | 0        | 0.018998 |
| ENSACAP00000008189 | 0.008571 | 0.348789 | 0        | 0        | 0.030125 | 0.010253 |
| ENSACAP00000009478 | 0        | 0        | 0.042702 | 0        | 0        | 0        |
| ENSACAP00000012057 | 0.033848 | 1.2646   | 0.661897 | 0.21944  | 0.594766 | 5.94E-06 |
| ENSACAP00000012140 | 0.693727 | 1.57734  | 0        | 1.91526  | 0.759613 | 3.61906  |
| ENSACAP00000006657 | 0.606541 | 1.92691  | 0.147584 | 0.338826 | 0.37731  | 0.041949 |
| ENSACAP00000013595 | 0.440723 | 3.62887  | 0        | 0        | 0        | 2.11454  |
| ENSACAP00000014885 | 0.543718 | 0        | 0.702946 | 0.263922 | 1135.32  | 0.846513 |
| ENSACAP00000001047 | 2.13802  | 1.64265  | 0.003149 | 0.79591  | 0.306151 | 4.29601  |
| ENSACAP00000006472 | 5.18323  | 7.5614   | 0.485881 | 29.8579  | 5.74657  | 9.57647  |
| ENSACAP00000001737 | 1.95142  | 2.45821  | 2.33E-08 | 1.10E-08 | 0.196246 | 0        |
| ENSACAP00000009495 | 63.3984  | 1.57156  | 9.42914  | 2.09215  | 10.7693  | 11.4163  |
| ENSACAP00000010489 | 22.5099  | 27.3631  | 2.78499  | 10.076   | 4.39993  | 14.1941  |
| ENSACAP00000006502 | 0        | 0        | 0        | 0        | 0        | 0        |
| ENSACAP00000014526 | 29.1627  | 17.4793  | 4.15606  | 1.98017  | 7.86064  | 66.6454  |
| ENSACAP00000017040 | 21.4229  | 31.246   | 3.10582  | 2.94648  | 9.73461  | 29.437   |
| ENSACAP00000002954 | 0        | 0.021462 | 0.274914 | 0.518235 | 4.24633  | 10.1076  |
| ENSACAP00000011565 | 0        | 1.08498  | 0.123723 | 0.143601 | 0.62161  | 0.062448 |
| ENSACAP00000008830 | 4.17376  | 32.9086  | 0.538839 | 2.00858  | 8.4844   | 16.8039  |

|                    |          |          |          |          |          |          |
|--------------------|----------|----------|----------|----------|----------|----------|
| ENSACAP00000013318 | 32.2161  | 20.9545  | 5.78782  | 2.92172  | 4.56347  | 78.7293  |
| ENSACAP00000009221 | 16.4102  | 13.8221  | 5.31263  | 2.41263  | 3.96006  | 0.573768 |
| ENSACAP00000000009 | 11.0607  | 20.0192  | 2.54276  | 15.7734  | 4.89428  | 2.95594  |
| ENSACAP00000007838 | 10.3269  | 13.8896  | 2.5696   | 8.33971  | 2.93468  | 6.40325  |
| ENSACAP00000014977 | 0.038951 | 0        | 0.238244 | 0        | 0        | 1.038    |
| ENSACAP00000008288 | 0.59126  | 1.22163  | 0        | 0.287773 | 1.03669  | 0        |
| ENSACAP00000017420 | 0.815697 | 5.62156  | 0.058518 | 0        | 0.164865 | 0.045385 |
| ENSACAP00000006334 | 1.55432  | 1.27929  | 0        | 0        | 0        | 16.4456  |
| ENSACAP00000016788 | 1.12787  | 2.51438  | 0.720005 | 40.196   | 3.52244  | 2.48773  |
| ENSACAP00000015939 | 0.223201 | 0.022807 | 0.165061 | 0        | 0        | 0        |
| ENSACAP00000000378 | 0        | 7.81413  | 0        | 0.090709 | 0        | 0.000242 |
| ENSACAP00000011621 | 0.002506 | 0.040176 | 0.004845 | 0        | 0.007995 | 0        |
| ENSACAP00000011871 | 3.61508  | 2.2838   | 0.15178  | 0.059852 | 0.398515 | 0.10202  |
| ENSACAP00000011671 | 28.5646  | 0.160435 | 0        | 9.77408  | 0.116579 | 0.026964 |
| ENSACAP00000003647 | 1.17094  | 0        | 0        | 0        | 7.60898  | 0.923104 |
| ENSACAP00000008929 | 0.32762  | 18.5255  | 0.26038  | 0.16019  | 0.5746   | 0.31182  |
| ENSACAP00000022226 | 0.149615 | 2.30819  | 0        | 0        | 0        | 0.25803  |
| ENSACAP00000019515 | 0        | 11.4557  | 0        | 0.24914  | 0.110796 | 0.05464  |
| ENSACAP00000005274 | 2.77158  | 0.736284 | 0.209649 | 0.239713 | 1.43523  | 1.04772  |
| ENSACAP00000013614 | 1.77549  | 0.012778 | 0        | 0        | 0.007957 | 0        |
| ENSACAP00000012329 | 83.8397  | 164.006  | 32.4238  | 66.6096  | 35.2681  | 224.202  |
| ENSACAP00000016496 | 3.38227  | 2.15831  | 0        | 0.49654  | 12.4841  | 0.872877 |
| ENSACAP00000011662 | 0.922241 | 2.33488  | 0        | 3.82699  | 0.764611 | 1.69394  |
| ENSACAP00000011157 | 1.05632  | 134.163  | 0        | 0.366902 | 1.52788  | 1.35657  |
| ENSACAP00000015218 | 24.6629  | 8.03238  | 0.747037 | 27.6211  | 4.97219  | 12.9152  |
| ENSACAP00000004467 | 930.036  | 1053.07  | 851.98   | 357.18   | 1075.3   | 1168.91  |
| ENSACAP00000009803 | 425.203  | 9.64136  | 3996.98  | 22.0618  | 6.57345  | 72.9969  |
| ENSACAP00000003843 | 23.1034  | 242.675  | 6.40238  | 22.2437  | 3.98828  | 151.385  |
| ENSACAP00000013010 | 222.747  | 124      | 17.0137  | 84.1111  | 42.8344  | 92.1874  |
| ENSACAP00000009832 | 26.582   | 8.00811  | 562.296  | 2.74288  | 0.954115 | 2.79564  |
| ENSACAP00000017274 | 0.130092 | 0        | 0        | 0.489076 | 661.882  | 0        |

|                      |          |          |          |          |          |          |
|----------------------|----------|----------|----------|----------|----------|----------|
| ENSACAP00000016356   | 314.876  | 0.554498 | 0.254866 | 0.565429 | 0.562039 | 2.05331  |
| ENSACAP00000001457   | 42.4337  | 1.44903  | 59.2559  | 7.11569  | 45.1389  | 312.384  |
| ENSACAP00000006616   | 94.2281  | 57.978   | 12.3679  | 68.8764  | 33.223   | 46.2403  |
| ENSACAP00000008156   | 0.71902  | 0.307503 | 0.253042 | 0.452523 | 210.421  | 0.199105 |
| ENSACAP00000012414   | 32.7448  | 70.0169  | 9.55894  | 20.7619  | 11.7767  | 178.915  |
| ENSACAP00000008943   | 20.8192  | 75.4446  | 10.0576  | 76.6192  | 11.8327  | 76.1043  |
| ENSACAP00000012268   | 56.7433  | 52.5249  | 6.54923  | 94.2844  | 11.6687  | 115.189  |
| ENSACAP00000003664   | 6.06873  | 3.41914  | 91.045   | 61.7463  | 5.5864   | 3.15372  |
| ENSACAP00000001895   | 51.2686  | 6.70714  | 0.921844 | 0.659825 | 3.02789  | 1.62014  |
| ENSACAP00000010758   | 11.6401  | 59.3362  | 2.86333  | 12.1318  | 7.47839  | 67.0762  |
| ENSACAP00000016889   | 3.15882  | 5.87642  | 23.4102  | 0.782768 | 5.77503  | 6.36612  |
| ENSACAP00000021261   | 3.95308  | 22.0078  | 0.153595 | 8.74252  | 0.46349  | 1.96337  |
| ENSACAP00000006308   | 7.88347  | 0        | 0        | 0        | 0        | 0        |
| ENSACAP00000019091   | 7.08736  | 0.291752 | 0        | 0.20954  | 0        | 0.808289 |
| ENSACAP00000001757   | 4.44634  | 0.90526  | 0.074581 | 8.16959  | 1.04745  | 2.46045  |
| ENSACAP00000014797   | 3.11661  | 0.052932 | 0        | 0        | 0.199434 | 0.192623 |
| ENSACAP00000005022   | 1.47905  | 6.18229  | 0.917932 | 1.13312  | 0.928093 | 0.446324 |
| ENSACAP00000022783   | 6.17385  | 0.408141 | 0.608298 | 7.28023  | 0        | 5.08931  |
| ENSACAP00000020092   | 0.107396 | 0.273758 | 0.170513 | 0        | 2.33637  | 0.179724 |
| ENSACAP00000006379   | 0        | 0        | 4.80292  | 0.400213 | 0        | 0        |
| ENSACAP00000005058   | 0        | 0.070644 | 0        | 0.207366 | 4.2783   | 0.181947 |
| ENSACAP00000004056   | 2.5726   | 0.0969   | 0        | 0.047941 | 0.095841 | 0        |
| ENSACAP00000011853   | 0.63041  | 0.421313 | 0        | 0.691861 | 1.27036  | 0.030586 |
| ENSACAP00000018492   | 1.961    | 0.153738 | 0        | 0.440688 | 0        | 2.54383  |
| ENSACAP00000004932   | 0.48636  | 1.16017  | 0        | 0        | 0.765353 | 0        |
| <i>N. phrynoides</i> | PSGs     | brain    | heart    | liver    |          |          |
| ENSACAP00000004108   |          | 1.92951  | 0.02714  | 0        |          |          |
| ENSACAP00000009739   |          | 2.66803  | 0.053922 | 0        |          |          |
| ENSACAP00000023290   |          | 7.297    | 0.024739 | 0        |          |          |
| ENSACAP00000010546   |          | 7.53433  | 3.76094  | 0        |          |          |
| ENSACAP00000003528   |          | 4.93488  | 5.7034   | 1.19618  |          |          |



|                    |          |          |          |
|--------------------|----------|----------|----------|
| ENSACAP00000004644 | 10.6941  | 36.4969  | 1.90299  |
| ENSACAP00000001089 | 10.1273  | 38.1406  | 4.57709  |
| ENSACAP00000001626 | 5.82998  | 5.6912   | 1.51968  |
| ENSACAP00000014702 | 37.6553  | 308.826  | 14.8     |
| ENSACAP00000012786 | 76.8458  | 14.8507  | 4.86266  |
| ENSACAP00000000060 | 336.506  | 1973.14  | 179.52   |
| ENSACAP00000017016 | 0.439077 | 234.053  | 457.647  |
| ENSACAP00000010811 | 449.457  | 1677.3   | 389.411  |
| ENSACAP00000010281 | 2.59567  | 23.6529  | 4.23222  |
| ENSACAP00000008583 | 147.219  | 0.119203 | 0.245468 |
| ENSACAP00000005899 | 47.7693  | 2.0613   | 0.42675  |
| ENSACAP00000015045 | 35.1961  | 28.2431  | 19.6837  |
| ENSACAP00000004154 | 3.9437   | 8.3856   | 5.60567  |
| ENSACAP00000010244 | 1.01213  | 63.4687  | 0.072337 |
| ENSACAP00000017999 | 6.82347  | 10.7306  | 9.72927  |
| ENSACAP00000002155 | 0.179261 | 22.23    | 98.2864  |
| ENSACAP00000014692 | 3.56613  | 20.065   | 2.42555  |
| ENSACAP00000006379 | 8.28911  | 0.375249 | 0.292961 |
| ENSACAP00000016462 | 6.3435   | 1.88635  | 0.242336 |
| ENSACAP00000009907 | 2.2854   | 0        | 0        |
| ENSACAP00000016661 | 6.93854  | 0.312322 | 0.256172 |
| ENSACAP00000007387 | 0.217112 | 1.25233  | 0        |
| ENSACAP00000002450 | 0.54735  | 0.482362 | 0        |
| ENSACAP00000008096 | 14.4758  | 16.9448  | 0.877635 |
| ENSACAP00000011007 | 3.61991  | 2.19824  | 0.792604 |
| ENSACAP00000005559 | 5.88607  | 3.81185  | 0.600964 |
| ENSACAP00000010278 | 2.37456  | 3.3895   | 0        |
| ENSACAP00000000748 | 0        | 2.47279  | 0        |
| ENSACAP00000016585 | 0.744605 | 3.34114  | 0        |
| ENSACAP00000013502 | 2.60359  | 0        | 0        |
| ENSACAP00000002004 | 3.7549   | 6.34282  | 0.535776 |

|                    |          |          |          |
|--------------------|----------|----------|----------|
| ENSACAP00000008893 | 0.483065 | 0        | 6.10299  |
| ENSACAP00000004484 | 2.44091  | 0.42827  | 0.145252 |
| ENSACAP00000022448 | 1.49986  | 0.837607 | 0.331129 |
| ENSACAP00000008820 | 4.05881  | 2.21004  | 0        |
| ENSACAP00000003323 | 3.71521  | 0.188777 | 0        |
| ENSACAP00000008624 | 0.158505 | 1.63848  | 0.393181 |
| ENSACAP00000002778 | 1.69501  | 0.649326 | 0.041195 |
| ENSACAP00000015858 | 1.02713  | 0.498256 | 2.74132  |
| ENSACAP00000008740 | 1.80991  | 0        | 0        |
| ENSACAP00000015283 | 2.01188  | 0        | 0        |
| ENSACAP00000005035 | 4.38349  | 1.02222  | 1.37541  |
| ENSACAP00000002479 | 2.10056  | 0.246251 | 0        |
| ENSACAP00000004168 | 0.120647 | 0        | 0.159786 |
| ENSACAP00000015870 | 0.684353 | 0.24168  | 0        |
| ENSACAP00000006881 | 3.45968  | 3.01867  | 0        |
| ENSACAP00000016956 | 0.552901 | 0.087855 | 0.473578 |
| ENSACAP00000001366 | 2.50349  | 0.730627 | 0.637766 |
| ENSACAP00000016170 | 0        | 0.408908 | 212.972  |
| ENSACAP00000002246 | 0.03506  | 5.44187  | 0.142788 |
| ENSACAP00000003956 | 2395.04  | 3655.25  | 2134.77  |
| ENSACAP00000006283 | 1.50791  | 0        | 0.332892 |
| ENSACAP00000015368 | 8.32366  | 4.52615  | 3.00251  |
| ENSACAP00000017541 | 1.05281  | 0.57696  | 0.596302 |
| ENSACAP00000009180 | 4.92216  | 14.3224  | 4.00677  |
| ENSACAP00000001369 | 0.12423  | 1.06214  | 0        |
| ENSACAP00000012275 | 19.5536  | 27.918   | 17.038   |
| ENSACAP00000013942 | 8.015    | 4.71024  | 0.822037 |
| ENSACAP00000007398 | 1.16404  | 4.63919  | 0        |
| ENSACAP00000006927 | 2.74012  | 0.170831 | 0.104227 |
| ENSACAP00000017456 | 1.83605  | 0.213314 | 0        |
| ENSACAP00000013792 | 87.3764  | 174.52   | 38.4617  |

|                     |          |          |          |
|---------------------|----------|----------|----------|
| ENSACAP00000001605  | 1.87823  | 1.17189  | 0        |
| ENSACAP000000016547 | 1.85731  | 3.42747  | 4.25378  |
| ENSACAP000000009331 | 1.27854  | 0.460749 | 0.126342 |
| ENSACAP000000014514 | 3.8599   | 7.61462  | 6.53609  |
| ENSACAP000000001757 | 10.903   | 2.38371  | 0.998818 |
| ENSACAP000000007005 | 4.67917  | 2.49045  | 0        |
| ENSACAP000000006720 | 2.65461  | 1.76703  | 0.976056 |
| ENSACAP000000004177 | 0.972855 | 0.433469 | 0        |
| ENSACAP000000000220 | 2.99722  | 0.298001 | 0        |
| ENSACAP000000002909 | 1.29303  | 0        | 0        |
| ENSACAP000000004975 | 1.74719  | 0.295988 | 0.396493 |
| ENSACAP000000022859 | 5.89822  | 2.68263  | 2.06019  |
| ENSACAP000000007715 | 0.303132 | 0.62296  | 0        |
| ENSACAP000000016617 | 18.7922  | 0.17093  | 0.273892 |
| ENSACAP000000008647 | 0        | 0.41634  | 4.49819  |
| ENSACAP000000008204 | 3.71198  | 7.78533  | 0.890272 |
| ENSACAP000000012138 | 1.40732  | 2.43907  | 2.39929  |
| ENSACAP000000008420 | 4.7436   | 0.782105 | 0.366921 |
| ENSACAP000000010102 | 11.8585  | 2.64023  | 0.450601 |
| ENSACAP000000007342 | 9.257    | 0.794411 | 1.88589  |
| ENSACAP000000002583 | 0.893782 | 0.982248 | 0        |
| ENSACAP000000013530 | 2.34594  | 0.653974 | 0.57751  |
| ENSACAP000000002892 | 1.99498  | 0.304328 | 0        |
| ENSACAP000000000869 | 4.46872  | 0        | 0        |
| ENSACAP000000015851 | 5.49659  | 0.738581 | 0.112139 |
| ENSACAP000000006332 | 1.84045  | 0        | 0        |
| ENSACAP000000000778 | 0        | 0.803016 | 0.959395 |
| ENSACAP000000005827 | 1.15963  | 1.16745  | 1.02257  |
| ENSACAP000000015926 | 6.65251  | 2.3453   | 1.79324  |
| ENSACAP000000005033 | 0.474913 | 0.273414 | 0.523493 |
| ENSACAP000000006828 | 0.548974 | 0.211659 | 3.13445  |

|                    |          |          |          |
|--------------------|----------|----------|----------|
| ENSACAP00000005315 | 162.232  | 118.225  | 32.1369  |
| ENSACAP00000020564 | 0.366315 | 2.9417   | 8.26195  |
| ENSACAP00000002210 | 1.1122   | 1.38635  | 0        |
| ENSACAP00000002372 | 0        | 1.62489  | 6.49504  |
| ENSACAP00000009217 | 2.19581  | 1.42213  | 0        |
| ENSACAP00000000577 | 2.78388  | 0        | 0        |
| ENSACAP00000017591 | 2.00332  | 0.462474 | 0.608661 |
| ENSACAP00000012225 | 9.12122  | 6.00554  | 1.49598  |
| ENSACAP00000006596 | 2.99764  | 7.0199   | 0        |
| ENSACAP00000001925 | 0.523183 | 0.388874 | 3.84E-06 |
| ENSACAP00000011157 | 0.733829 | 4.86915  | 0        |
| ENSACAP00000010520 | 0.515328 | 0        | 0        |
| ENSACAP00000008645 | 0        | 0        | 0.096566 |
| ENSACAP00000022842 | 0.419283 | 2.47695  | 0        |
| ENSACAP00000005078 | 0        | 3.05141  | 0.954639 |
| ENSACAP00000021570 | 0.261497 | 0.42842  | 0.220105 |
| ENSACAP00000016155 | 4.10634  | 0.126753 | 0        |
| ENSACAP00000014368 | 9.48515  | 5.13369  | 0        |
| ENSACAP00000004064 | 1.17084  | 0.461754 | 0        |
| ENSACAP00000007082 | 0.054859 | 0.129334 | 0.436233 |
| ENSACAP00000003280 | 0.869911 | 2.01057  | 0.855904 |
| ENSACAP00000000516 | 0        | 15.214   | 11.1565  |
| ENSACAP00000003816 | 4.38848  | 8.29132  | 6.65127  |
| ENSACAP00000002264 | 0        | 11.7003  | 0.96566  |
| ENSACAP00000020940 | 0.488928 | 0.990349 | 0        |
| ENSACAP00000015617 | 4.14067  | 7.53481  | 0.852435 |
| ENSACAP00000007271 | 0.114675 | 0.230794 | 0.331677 |
| ENSACAP00000007546 | 1.83926  | 0.470876 | 0        |
| ENSACAP00000014496 | 2.97756  | 12.1236  | 0.352769 |
| ENSACAP00000006856 | 2.4145   | 4.40674  | 0.177241 |
| ENSACAP00000007588 | 1.25497  | 0        | 0.403529 |

|                    |          |          |          |
|--------------------|----------|----------|----------|
| ENSACAP00000008903 | 0.88557  | 0.46789  | 0        |
| ENSACAP00000012760 | 0.071714 | 13.1729  | 17.2924  |
| ENSACAP00000000442 | 2.24578  | 1.73491  | 0.521739 |
| ENSACAP00000003539 | 0.124878 | 2.53182  | 0.262525 |
| ENSACAP00000002580 | 30.617   | 23.9978  | 3.63028  |
| ENSACAP00000015047 | 0        | 2.68237  | 0.461768 |
| ENSACAP00000013241 | 1.79391  | 0.453727 | 0.581123 |
| ENSACAP00000008163 | 19.632   | 0        | 0        |
| ENSACAP00000013146 | 0.45681  | 0.743574 | 6.33E-08 |
| ENSACAP00000002766 | 26.9082  | 16.7505  | 6.53657  |
| ENSACAP00000004996 | 1.91314  | 0.575288 | 0.41472  |
| ENSACAP00000017656 | 1.29205  | 11.2043  | 0.566146 |
| ENSACAP00000016238 | 8.84483  | 16.2699  | 12.1477  |
| ENSACAP00000011995 | 70.0106  | 1.97257  | 0        |
| ENSACAP00000006621 | 1.61859  | 0.180055 | 0        |
| ENSACAP00000012376 | 9.82752  | 4.23906  | 2.19974  |
| ENSACAP00000000791 | 11.8562  | 0.238606 | 0.345601 |
| ENSACAP00000004222 | 8.06724  | 0.346501 | 0.372376 |
| ENSACAP00000006131 | 0.310585 | 0.038896 | 0        |
| ENSACAP00000005095 | 0        | 0.514935 | 0        |
| ENSACAP00000001510 | 1.10053  | 9.77115  | 0        |
| ENSACAP00000000344 | 12.4532  | 1.43034  | 0.57616  |
| ENSACAP00000023463 | 9.67143  | 46.8211  | 0.823045 |
| ENSACAP00000010113 | 0.74472  | 0.49999  | 0        |
| ENSACAP00000019661 | 1.51983  | 0        | 0        |
| ENSACAP00000000009 | 1.61417  | 0.654313 | 0        |
| ENSACAP00000008308 | 0.114609 | 1.30E-07 | 0        |
| ENSACAP00000022783 | 1.722    | 0.457391 | 0        |
| ENSACAP00000011360 | 2.71398  | 0.33601  | 0        |
| ENSACAP00000000097 | 0        | 0        | 0        |
| ENSACAP00000011537 | 0        | 0.803396 | 0        |

|                    |          |          |          |
|--------------------|----------|----------|----------|
| ENSACAP00000008354 | 4.06626  | 1.42196  | 0.168961 |
| ENSACAP00000013343 | 3.95549  | 9.95695  | 2.01425  |
| ENSACAP00000021784 | 5.4513   | 0.821973 | 0.879325 |
| ENSACAP00000001230 | 0.673304 | 1.22167  | 5.96E-07 |
| ENSACAP00000001558 | 59.741   | 25.0209  | 3.5419   |
| ENSACAP00000005642 | 2.54229  | 5.26121  | 0.106308 |
| ENSACAP00000013183 | 4.40447  | 0.870398 | 0.9604   |
| ENSACAP00000001599 | 14.5686  | 16.0709  | 6.54795  |
| ENSACAP00000017690 | 3.00338  | 1.66422  | 0.382856 |
| ENSACAP00000003089 | 2.75889  | 2.51134  | 1.5429   |
| ENSACAP00000006024 | 0.778626 | 0        | 0        |
| ENSACAP00000013812 | 13.8946  | 8.82518  | 0.889295 |
| ENSACAP00000018355 | 5.37553  | 1.85724  | 1.82081  |
| ENSACAP00000014988 | 7.26647  | 3.33978  | 0.641782 |
| ENSACAP00000010827 | 5.10009  | 3.58341  | 2.54288  |
| ENSACAP00000011651 | 552.875  | 163.98   | 59.0032  |
| ENSACAP00000012440 | 9.76125  | 14.0871  | 2.16543  |
| ENSACAP00000018554 | 1.63447  | 0.726121 | 0.864555 |
| ENSACAP00000000726 | 19.7924  | 21.3992  | 3.87425  |
| ENSACAP00000002433 | 0.198365 | 0        | 0.125283 |
| ENSACAP00000015077 | 5.6788   | 10.0505  | 19.4667  |
| ENSACAP00000003827 | 6.18297  | 0.768018 | 0.136244 |
| ENSACAP00000014423 | 2.70357  | 0        | 0        |
| ENSACAP00000014302 | 26.0788  | 0.054447 | 0.07541  |
| ENSACAP00000012479 | 5.93826  | 11.9042  | 0.754407 |
| ENSACAP00000014578 | 0.966667 | 4.08056  | 19.3917  |
| ENSACAP00000017147 | 3.039    | 1.71358  | 1.13984  |
| ENSACAP00000016402 | 5.31777  | 2.43159  | 0        |
| ENSACAP00000008480 | 1.20003  | 0.831629 | 0.867373 |
| ENSACAP00000001611 | 0.014903 | 0.000174 | 0        |
| ENSACAP00000013158 | 2.52372  | 0.591976 | 0        |

|                    |          |          |          |
|--------------------|----------|----------|----------|
| ENSACAP00000007739 | 0.465732 | 0        | 0        |
| ENSACAP00000017417 | 1.87324  | 1.38669  | 0.761584 |
| ENSACAP00000008105 | 2.00445  | 4.23376  | 2.50345  |
| ENSACAP00000014951 | 0.598864 | 0.707457 | 2.49E-09 |
| ENSACAP00000001283 | 7.40819  | 9.98637  | 1.35737  |
| ENSACAP00000002021 | 6.6984   | 2.64948  | 2.25879  |
| ENSACAP00000023167 | 0.512729 | 2.22851  | 0        |
| ENSACAP00000010524 | 3.72393  | 8.50619  | 1.58044  |
| ENSACAP00000017711 | 0.130367 | 0.064658 | 0.150879 |
| ENSACAP00000017072 | 0.355613 | 0.490119 | 0.161487 |
| ENSACAP00000015946 | 1.68031  | 0        | 0        |
| ENSACAP00000006456 | 1.9223   | 1.34124  | 0.506977 |
| ENSACAP00000016387 | 2.35653  | 0.968545 | 0        |
| ENSACAP00000013434 | 0.833982 | 2.49E-06 | 0        |
| ENSACAP00000015102 | 0.560224 | 0.331867 | 0.539301 |
| ENSACAP00000005965 | 0        | 0        | 0        |
| ENSACAP00000004794 | 6.23631  | 4.56035  | 1.76832  |
| ENSACAP00000013104 | 45.4536  | 16.3416  | 9.54066  |
| ENSACAP00000013145 | 1.27079  | 3.78368  | 0.862611 |
| ENSACAP00000019188 | 0.804956 | 1.45858  | 1.66611  |
| ENSACAP00000004204 | 6.27321  | 9.55863  | 2.34505  |
| ENSACAP00000007602 | 3.73226  | 2.98426  | 3.95726  |
| ENSACAP00000005007 | 0        | 0.460466 | 0        |
| ENSACAP00000004166 | 0.736164 | 0.554467 | 0        |
| ENSACAP00000001278 | 9.8056   | 3.79305  | 0        |
| ENSACAP00000007253 | 3.49363  | 9.14279  | 1.76499  |
| ENSACAP00000011005 | 0.159655 | 0.070637 | 0.127534 |
| ENSACAP00000005757 | 49.8236  | 10.6401  | 1.28395  |
| ENSACAP00000013947 | 23.1118  | 0.194744 | 0        |
| ENSACAP00000022624 | 1.92422  | 0.35166  | 0.303794 |
| ENSACAP00000009030 | 0        | 0.873862 | 0.473381 |

|                    |          |          |          |
|--------------------|----------|----------|----------|
| ENSACAP00000009618 | 0.697115 | 5.10923  | 0        |
| ENSACAP00000000649 | 1.89208  | 0.455035 | 0        |
| ENSACAP00000001612 | 0.30354  | 0.071905 | 0        |
| ENSACAP00000015388 | 7.24327  | 1.35434  | 0.470292 |
| ENSACAP00000006543 | 2.57717  | 2927.22  | 6208.06  |
| ENSACAP00000011812 | 8.18835  | 8.27909  | 1.61806  |
| ENSACAP00000009049 | 0.056584 | 0.054716 | 0.067791 |
| ENSACAP00000003054 | 0.948986 | 0.20829  | 0        |
| ENSACAP00000015745 | 5.97758  | 16.74    | 4.10533  |
| ENSACAP00000006842 | 0.772869 | 2.0573   | 0        |
| ENSACAP00000001710 | 1.9416   | 0.567701 | 0        |
| ENSACAP00000001566 | 1.07896  | 1.19845  | 0.394539 |
| ENSACAP00000000982 | 0.046018 | 0        | 0        |
| ENSACAP00000002294 | 0.506594 | 3.16329  | 0.136318 |
| ENSACAP00000008439 | 0.860423 | 0.098958 | 0.223283 |
| ENSACAP00000003383 | 4.02812  | 1.62601  | 0.819079 |
| ENSACAP00000008137 | 1.84877  | 3.0193   | 0.380864 |
| ENSACAP00000003297 | 3.01031  | 1.40768  | 0        |
| ENSACAP00000003866 | 0.039548 | 0.016995 | 0        |
| ENSACAP00000003768 | 13.4014  | 0.062859 | 0.019306 |
| ENSACAP00000022899 | 0.509635 | 9.12E-06 | 0        |
| ENSACAP00000010317 | 0        | 4.8447   | 28.7411  |
| ENSACAP00000020699 | 15.5216  | 121.181  | 523.536  |
| ENSACAP00000012439 | 1.46806  | 3.36201  | 1.77546  |
| ENSACAP00000020710 | 3.01923  | 6.75984  | 1.60557  |
| ENSACAP00000022567 | 2.21429  | 0.564482 | 0.075139 |
| ENSACAP00000004779 | 1.04644  | 0        | 0.428815 |
| ENSACAP00000021704 | 0.751166 | 0        | 0        |
| ENSACAP00000011424 | 0        | 0        | 0        |
| ENSACAP00000010845 | 2.65913  | 0.524254 | 0        |
| ENSACAP00000007239 | 1.30313  | 0.134394 | 0        |



|                    |          |          |          |
|--------------------|----------|----------|----------|
| ENSACAP00000011603 | 2.54404  | 2.80107  | 1.65755  |
| ENSACAP00000015407 | 0.953423 | 0.729608 | 0.746592 |
| ENSACAP00000007334 | 4.5163   | 3.99732  | 1.8088   |
| ENSACAP00000007175 | 2.94368  | 1.0187   | 0.116929 |
| ENSACAP00000003183 | 0        | 0.006294 | 0        |
| ENSACAP00000017607 | 1.35468  | 5.34853  | 1.65041  |
| ENSACAP00000013720 | 21.7504  | 25.0091  | 5.90553  |
| ENSACAP00000005180 | 2.29385  | 1.43851  | 2.33765  |
| ENSACAP00000022351 | 1.81416  | 1.83936  | 0.205385 |
| ENSACAP00000009136 | 0.059798 | 0.304515 | 0        |
| ENSACAP00000001610 | 0.967475 | 5.05906  | 0.884373 |
| ENSACAP00000008929 | 0.921976 | 0.38957  | 0.147135 |
| ENSACAP00000002048 | 3.46165  | 1.50037  | 0.480253 |
| ENSACAP00000005316 | 7.59175  | 3.75359  | 4.66925  |
| ENSACAP00000003497 | 0.204777 | 6.31E-10 | 0        |
| ENSACAP00000009390 | 3.31167  | 0.554834 | 0.358486 |
| ENSACAP00000006815 | 0        | 0        | 0        |
| ENSACAP00000007914 | 0        | 0.200595 | 0.18548  |
| ENSACAP00000013835 | 0.654264 | 0.618352 | 0        |
| ENSACAP00000013028 | 0.5237   | 0.07525  | 0.102208 |
| ENSACAP00000021856 | 1.17675  | 1.52033  | 2.70296  |
| ENSACAP00000004973 | 0        | 0        | 0.120817 |
| ENSACAP00000009086 | 0        | 0.550294 | 0.69096  |
| ENSACAP00000009363 | 0.426793 | 0.278813 | 0.138555 |
| ENSACAP00000010079 | 0.773469 | 0.039825 | 6.67E-09 |
| ENSACAP00000015125 | 0.000857 | 36.2554  | 122.464  |
| ENSACAP00000010489 | 0        | 0        | 0        |
| ENSACAP00000011352 | 4.90717  | 4.77705  | 3.47577  |
| ENSACAP00000011045 | 0.258734 | 0        | 0.035841 |
| ENSACAP00000002842 | 45.3954  | 23.4749  | 9.70221  |
| ENSACAP00000019138 | 2.80998  | 0.757942 | 0        |

|                    |          |          |          |
|--------------------|----------|----------|----------|
| ENSACAP00000011545 | 0        | 0        | 0        |
| ENSACAP00000005130 | 0.114728 | 0        | 0        |
| ENSACAP00000020409 | 4.07102  | 7.07143  | 1.84005  |
| ENSACAP00000007392 | 1.3018   | 1.52579  | 0        |
| ENSACAP00000015291 | 0.248859 | 2.65129  | 1.20974  |
| ENSACAP00000009566 | 2.35362  | 0.6277   | 0.433199 |
| ENSACAP00000007135 | 4.94287  | 0.528928 | 0        |
| ENSACAP00000005323 | 0.081177 | 6.86243  | 26.1253  |
| ENSACAP00000001907 | 128.926  | 4.2925   | 0.363307 |
| ENSACAP00000013905 | 0        | 1.70728  | 1.60304  |
| ENSACAP00000013049 | 0.883526 | 2.55755  | 0.249701 |
| ENSACAP00000011838 | 19.7293  | 3.31787  | 0.490756 |
| ENSACAP00000013508 | 62.8143  | 0.489159 | 0.00232  |
| ENSACAP00000012114 | 2.86504  | 15.0282  | 2.51594  |
| ENSACAP00000004033 | 0.196773 | 0.0298   | 0        |
| ENSACAP00000021749 | 3.39844  | 0.994672 | 0.91552  |
| ENSACAP00000013144 | 134.459  | 71.0199  | 69.511   |
| ENSACAP00000016373 | 3.95119  | 2.19684  | 1.9486   |
| ENSACAP00000009134 | 11.1344  | 10.5837  | 1.83437  |
| ENSACAP00000020059 | 1.61234  | 3.92033  | 1.62683  |
| ENSACAP00000000934 | 3.34366  | 0.982068 | 3.72027  |
| ENSACAP00000005274 | 1.90865  | 2.18412  | 0.915523 |
| ENSACAP00000015231 | 20.9588  | 34.1593  | 69.838   |
| ENSACAP00000015232 | 2.03918  | 0        | 0        |
| ENSACAP00000004913 | 3.08366  | 0.766368 | 0.267205 |
| ENSACAP00000012614 | 0        | 0.953318 | 5.48938  |
| ENSACAP00000004463 | 1.33433  | 3.53916  | 0        |
| ENSACAP00000001568 | 0        | 0.941594 | 0.624117 |
| ENSACAP00000001641 | 0.128435 | 0        | 0        |
| ENSACAP00000006565 | 4.42509  | 3.79742  | 1.02878  |
| ENSACAP00000007441 | 1.07749  | 0.046319 | 0.504102 |

|                    |          |          |          |
|--------------------|----------|----------|----------|
| ENSACAP00000006202 | 1.33628  | 2.13744  | 2.13899  |
| ENSACAP00000017732 | 0.533161 | 1.89098  | 0        |
| ENSACAP00000001943 | 12.8843  | 7.98602  | 1.18333  |
| ENSACAP00000016429 | 1.6413   | 1.18134  | 0.130892 |
| ENSACAP00000006487 | 16.2647  | 6.88629  | 6.16883  |
| ENSACAP00000015218 | 4.78976  | 0.710778 | 1.07186  |
| ENSACAP00000007400 | 21.4334  | 13.7727  | 20.5211  |
| ENSACAP00000002933 | 0.040264 | 0.626729 | 0        |
| ENSACAP00000012152 | 14.7385  | 8.57175  | 3.87936  |
| ENSACAP00000002239 | 1.77291  | 66.1975  | 353.381  |
| ENSACAP00000016035 | 2.75414  | 3.95991  | 3.17876  |
| ENSACAP00000007406 | 0.588832 | 1.27E-06 | 3.54E-05 |
| ENSACAP00000006605 | 3.52459  | 0.867705 | 0.549843 |
| ENSACAP00000015327 | 0.458303 | 0.32494  | 0.276025 |
| ENSACAP00000018017 | 6.75804  | 2.67832  | 1.84068  |
| ENSACAP00000008010 | 1.128    | 1.55996  | 0        |
| ENSACAP00000008691 | 0        | 0        | 0        |
| ENSACAP00000014854 | 3.10712  | 6.08058  | 1.28514  |
| ENSACAP00000013202 | 0.052669 | 0        | 0.002338 |
| ENSACAP00000015715 | 2.68985  | 14.9393  | 10.3968  |
| ENSACAP00000012577 | 0.319767 | 0.619699 | 0.479282 |
| ENSACAP00000006218 | 1.42188  | 0.074296 | 0.125234 |
| ENSACAP00000008525 | 0.677403 | 0        | 0        |
| ENSACAP00000009525 | 0.116602 | 1.81238  | 0.16454  |
| ENSACAP00000016067 | 0        | 0        | 0        |
| ENSACAP00000016408 | 8.35753  | 3.54426  | 1.88271  |
| ENSACAP00000003683 | 4.12584  | 0.526568 | 0.188141 |
| ENSACAP00000014072 | 28.3263  | 0.627486 | 0.164666 |
| ENSACAP00000010337 | 0.847309 | 0        | 0.047949 |
| ENSACAP00000000221 | 0.705668 | 0.043468 | 0        |
| ENSACAP00000006046 | 2.07235  | 0.720252 | 0.574054 |

|                    |          |          |          |
|--------------------|----------|----------|----------|
| ENSACAP00000017010 | 3.04018  | 8.18963  | 9.1979   |
| ENSACAP00000002361 | 0        | 2.53274  | 0        |
| ENSACAP00000000355 | 11.3543  | 0.690189 | 1.98209  |
| ENSACAP00000017296 | 3.60593  | 4.46405  | 0.092999 |
| ENSACAP00000017567 | 78.5364  | 133.944  | 104.623  |
| ENSACAP00000007428 | 4.25005  | 2.39066  | 2.31596  |
| ENSACAP00000008955 | 3.20096  | 0        | 0        |
| ENSACAP00000012390 | 0.09838  | 0.091693 | 0        |
| ENSACAP00000014132 | 53.0362  | 0        | 0        |
| ENSACAP00000016553 | 4.24219  | 2.21102  | 1.15674  |
| ENSACAP00000016819 | 20.4093  | 15.1421  | 4.62014  |
| ENSACAP00000006502 | 11.276   | 81.515   | 7.86571  |
| ENSACAP00000000190 | 1.28126  | 1264.44  | 4055.95  |
| ENSACAP00000002268 | 23.2209  | 13.8907  | 5.05606  |
| ENSACAP00000002161 | 593.21   | 3254.67  | 959.838  |
| ENSACAP00000004828 | 795.912  | 7.21444  | 2.65449  |
| ENSACAP00000010109 | 178.814  | 310.26   | 246.253  |
| ENSACAP00000017866 | 66.9977  | 216.803  | 28.7273  |
| ENSACAP00000005561 | 0.265347 | 116.352  | 288.28   |
| ENSACAP00000009495 | 40.8161  | 47.2902  | 14.0712  |
| ENSACAP00000001433 | 101.295  | 51.7779  | 43.6446  |
| ENSACAP00000003435 | 75.9677  | 80.5918  | 33.217   |
| ENSACAP00000017274 | 78.6641  | 80.1739  | 17.7361  |
| ENSACAP00000006508 | 1.19256  | 79.7944  | 0        |
| ENSACAP00000018531 | 56.1486  | 18.1134  | 10.1358  |
| ENSACAP00000006555 | 37.6474  | 36.6474  | 13.2159  |
| ENSACAP00000000530 | 29.183   | 0.031498 | 0.033939 |
| ENSACAP00000006240 | 29.7966  | 58.1103  | 9.64772  |
| ENSACAP00000003035 | 37.8978  | 31.7497  | 6.03504  |
| ENSACAP00000004891 | 9.25568  | 58.3229  | 4.95456  |
| ENSACAP00000002037 | 59.4863  | 0        | 0.215128 |

|                   |                    |          |          |          |          |          |          |
|-------------------|--------------------|----------|----------|----------|----------|----------|----------|
|                   | ENSACAP00000000925 | 9.21254  | 17.9237  | 3.7244   |          |          |          |
|                   | ENSACAP00000004674 | 2.34221  | 0.196313 | 0.280238 |          |          |          |
|                   | ENSACAP00000019744 | 0.703184 | 1.64845  | 4.34313  |          |          |          |
|                   | ENSACAP00000014871 | 2.30947  | 0.842763 | 0        |          |          |          |
| <i>Q. spinosa</i> | PSGs               | brain    | heart    | liver    | ovary    | skin     | testis   |
|                   | ENSACAP00000023038 | 0.440349 | 1.21022  | 0.168382 | 0        | 0.318539 | 0.255496 |
|                   | ENSACAP00000011007 | 7.79031  | 0.827077 | 0        | 1.78306  | 0.081191 | 37.838   |
|                   | ENSACAP00000016677 | 1.28353  | 0        | 0        | 0        | 0        | 0        |
|                   | ENSACAP00000004467 | 0.092172 | 1.46938  | 0.249346 | 0.074482 | 1.04235  | 1.29377  |
|                   | ENSACAP00000017751 | 0.312409 | 0        | 0.213475 | 0        | 0.948952 | 0        |
|                   | ENSACAP00000015070 | 91.5279  | 74.4423  | 10.496   | 4.03419  | 125.612  | 195.646  |
|                   | ENSACAP00000007659 | 1.55679  | 8.85625  | 33.6726  | 0.564433 | 3.69219  | 3.1271   |
|                   | ENSACAP00000017283 | 1.00716  | 0        | 0        | 0.023234 | 0        | 0.019367 |
|                   | ENSACAP00000015849 | 1.99676  | 0        | 0        | 0        | 0        | 0        |
|                   | ENSACAP00000005899 | 0        | 0.910017 | 0        | 0        | 0.594949 | 0.071835 |
|                   | ENSACAP00000000391 | 0.133039 | 0        | 0        | 0        | 0        | 0.081848 |
|                   | ENSACAP00000015147 | 0.060833 | 0.643698 | 28.97    | 1.3438   | 0.030302 | 1.7032   |
|                   | ENSACAP00000022313 | 0.886834 | 0        | 0        | 0        | 0        | 0        |
|                   | ENSACAP00000002155 | 3.61065  | 1.63793  | 331.49   | 1.80806  | 1.0346   | 0.771401 |
|                   | ENSACAP00000010053 | 38.1052  | 205.283  | 52.7317  | 15.8153  | 65.9849  | 57.6875  |
|                   | ENSACAP00000010147 | 0.596672 | 0        | 2.26629  | 85.7319  | 339.08   | 0.338051 |
|                   | ENSACAP00000006604 | 27.5526  | 15.4298  | 4.75796  | 55.9505  | 21.0746  | 30.8713  |
|                   | ENSACAP00000012470 | 41.613   | 35.6952  | 8.77621  | 16.5329  | 29.7574  | 61.9815  |
|                   | ENSACAP00000016067 | 5.11805  | 1.23392  | 0.185032 | 0.2242   | 3.25615  | 1.49719  |
|                   | ENSACAP00000005089 | 6.39343  | 2.42441  | 0.989231 | 7.15795  | 2.89487  | 1.05333  |
|                   | ENSACAP00000007005 | 1.72369  | 0        | 0        | 0        | 0        | 0.056886 |
|                   | ENSACAP00000001580 | 1.84955  | 0        | 0.11338  | 0.067559 | 0        | 0.05841  |
|                   | ENSACAP00000000932 | 1.90163  | 0        | 0.039926 | 0.023392 | 0.150336 | 0.039297 |
|                   | ENSACAP00000004466 | 0.431525 | 0.85273  | 0.078306 | 1.32422  | 0.926685 | 7.76382  |
|                   | ENSACAP00000017496 | 4.17059  | 0.061706 | 0.084697 | 0.248254 | 1.4674   | 0.062615 |
|                   | ENSACAP00000010758 | 2.63792  | 1.54362  | 0        | 2.79087  | 1.12149  | 3.95209  |

|                    |          |          |          |          |          |          |
|--------------------|----------|----------|----------|----------|----------|----------|
| ENSACAP00000004078 | 2.39202  | 0        | 0        | 0        | 0        | 0        |
| ENSACAP00000004798 | 0.500513 | 0.954429 | 0.287972 | 0.113937 | 0.145461 | 0.489118 |
| ENSACAP00000022284 | 0        | 1.5083   | 0        | 0        | 0        | 0.409259 |
| ENSACAP00000001589 | 0.443187 | 1.77921  | 0.239476 | 0        | 0.090959 | 0.867072 |
| ENSACAP00000023366 | 4.80972  | 0        | 0        | 0        | 0        | 0        |
| ENSACAP00000009761 | 1.67932  | 0.890335 | 0.720305 | 15.1548  | 1.22716  | 15.3119  |
| ENSACAP00000021933 | 0.194486 | 0.405652 | 0        | 0        | 0.323003 | 1.12887  |
| ENSACAP00000001760 | 0.326379 | 0.066348 | 0.522492 | 0.051789 | 0.595677 | 0.792284 |
| ENSACAP00000005047 | 9.71634  | 7.72551  | 9.06E-06 | 44.0784  | 8.06356  | 7.19743  |
| ENSACAP00000015416 | 9.51647  | 30.8159  | 11.4138  | 7.47099  | 11.6897  | 32.3541  |
| ENSACAP00000011696 | 103.783  | 0        | 0.049309 | 0        | 0.408878 | 0        |
| ENSACAP00000006319 | 0.274655 | 0.688728 | 0.156203 | 0.03059  | 0.117786 | 0.619554 |
| ENSACAP00000013296 | 0.376631 | 0.565651 | 0.859477 | 0.103821 | 0.393986 | 0.45968  |
| ENSACAP00000022652 | 1.85923  | 2.16199  | 0.197082 | 0.83818  | 1.35895  | 7.17962  |
| ENSACAP00000013672 | 10.9959  | 11.2892  | 3.39213  | 10.1721  | 11.6823  | 36.3003  |
| ENSACAP00000011083 | 15.4296  | 4.40306  | 16.6597  | 63.4174  | 20.613   | 6.16951  |
| ENSACAP00000008841 | 3.03592  | 1.73725  | 0.182033 | 0.041718 | 0.738878 | 2.12141  |
| ENSACAP00000010618 | 0.184547 | 0.993569 | 0.097239 | 30.5396  | 0.877212 | 8.02182  |
| ENSACAP00000002276 | 3.59117  | 0        | 0.010666 | 0        | 0.032025 | 0.477644 |
| ENSACAP00000023397 | 1.44034  | 1.90479  | 0.153724 | 1.60462  | 0.902087 | 2.14422  |
| ENSACAP00000015246 | 1.60052  | 0.883215 | 0.268119 | 0.317759 | 0.135335 | 1.31517  |
| ENSACAP00000012369 | 1.40906  | 0.105855 | 0        | 0.021375 | 0.164915 | 0.035861 |
| ENSACAP00000001643 | 2.33517  | 0.314603 | 0        | 1.88466  | 0        | 0.928254 |
| ENSACAP00000011628 | 0        | 0        | 0        | 0.027761 | 0.05722  | 0        |
| ENSACAP00000008070 | 3.00855  | 10.5791  | 2.55639  | 0.711902 | 3.9326   | 5.43313  |
| ENSACAP00000009687 | 1.88911  | 0        | 0        | 0        | 0        | 0        |
| ENSACAP00000003229 | 2.2307   | 1.32654  | 0        | 1.03565  | 0.790757 | 18.6525  |
| ENSACAP00000001268 | 1.83971  | 0        | 0.593199 | 0.058714 | 0.224799 | 1.16077  |
| ENSACAP00000012746 | 0.8623   | 0.217274 | 0.248542 | 0        | 0.299297 | 0.147957 |
| ENSACAP00000021909 | 0.087234 | 2.61247  | 0        | 0.068211 | 0.787363 | 0.461553 |
| ENSACAP00000002257 | 2.38872  | 1.61748  | 1.28541  | 16.0007  | 1.18971  | 2.90973  |

|                     |          |          |          |          |          |          |
|---------------------|----------|----------|----------|----------|----------|----------|
| ENSACAP00000002101  | 3.85813  | 0.061841 | 0        | 23.1133  | 0.123934 | 4.13708  |
| ENSACAP00000000934  | 1.18041  | 0.633115 | 0.274736 | 0.702261 | 0.800251 | 0.981576 |
| ENSACAP00000001347  | 4.51584  | 0        | 0        | 0        | 0        | 0        |
| ENSACAP000000009624 | 3.88916  | 30.7192  | 11.6964  | 3.40598  | 41.7843  | 17.1673  |
| ENSACAP000000014830 | 9.82899  | 0        | 0        | 0.102808 | 0        | 0        |
| ENSACAP000000004589 | 7.43838  | 30.5904  | 17.6586  | 26.0517  | 9.00527  | 208.7    |
| ENSACAP000000003355 | 9.32087  | 0        | 0        | 0.191508 | 0        | 0.178242 |
| ENSACAP000000012754 | 1.09624  | 0.265336 | 0.227471 | 13.4874  | 4.31711  | 18.2264  |
| ENSACAP000000008681 | 2.93025  | 0        | 0        | 0        | 0        | 0        |
| ENSACAP000000007066 | 0        | 4.14648  | 0        | 0        | 0        | 0        |
| ENSACAP000000000778 | 0        | 0        | 0.048222 | 0        | 0.049446 | 0.047612 |
| ENSACAP000000000378 | 0.258478 | 0.45323  | 0        | 131.393  | 1.85436  | 8.10228  |
| ENSACAP000000009821 | 11.1448  | 0        | 0        | 0        | 0        | 0        |
| ENSACAP000000014417 | 1.39401  | 0.687459 | 0.989164 | 0.21842  | 0.186669 | 0.030837 |
| ENSACAP000000003664 | 0.072625 | 10.1604  | 0        | 0.636981 | 0.147831 | 343.616  |
| ENSACAP000000003069 | 6.03207  | 2.2818   | 0.490838 | 3.44625  | 5.8241   | 17.0637  |
| ENSACAP000000010744 | 12.3882  | 0        | 0.027496 | 0        | 0.041355 | 0        |
| ENSACAP000000002650 | 0.161434 | 1.55173  | 0        | 0.210152 | 0.021013 | 1.05096  |
| ENSACAP000000023237 | 0.966179 | 0        | 0.016141 | 0.000151 | 3.51E-06 | 0.016966 |
| ENSACAP000000013343 | 0.425277 | 2.69861  | 0.492028 | 1.3826   | 2.34279  | 4.8417   |
| ENSACAP000000009073 | 0.373993 | 3.52526  | 1.09567  | 68.3207  | 6.70496  | 2.87261  |
| ENSACAP000000009092 | 0.796123 | 0.43289  | 0.245734 | 14.779   | 1.67311  | 5.46094  |
| ENSACAP000000003231 | 0.070953 | 8.80747  | 0        | 0        | 0        | 0.38803  |
| ENSACAP000000002914 | 5.09408  | 3.66834  | 2.5552   | 6.75195  | 6.06216  | 9.42969  |
| ENSACAP000000000160 | 2.03251  | 0.686544 | 0        | 30.65    | 0.484383 | 0.334804 |
| ENSACAP000000023204 | 20.3599  | 33.9749  | 1.7155   | 0.27222  | 8.421    | 17.1576  |
| ENSACAP000000004762 | 3.874    | 9.35287  | 7.20275  | 14.1789  | 16.7298  | 8.5573   |
| ENSACAP000000005916 | 0        | 2.91951  | 0        | 0        | 0        | 1.4395   |
| ENSACAP000000000034 | 2.36469  | 0        | 0.11435  | 0.031791 | 0        | 0.16145  |
| ENSACAP000000016681 | 15.2133  | 35.2116  | 5.87213  | 257.047  | 88.6657  | 15.6169  |
| ENSACAP000000006046 | 8.6472   | 0.866351 | 0.014613 | 12.9828  | 0.272038 | 8.62491  |

|                     |          |          |          |          |          |          |
|---------------------|----------|----------|----------|----------|----------|----------|
| ENSACAP00000012342  | 0.523161 | 0.563413 | 0.107837 | 0.332379 | 0.410774 | 1.40327  |
| ENSACAP00000001893  | 3.92994  | 0.501431 | 2.58335  | 0.108647 | 0.046428 | 0.276066 |
| ENSACAP00000012879  | 1.97824  | 1.12994  | 0.504864 | 7.98081  | 1.41332  | 4.13815  |
| ENSACAP00000003660  | 0.15586  | 3.6554   | 0.161009 | 0.91426  | 0.063343 | 0.077678 |
| ENSACAP00000002102  | 13.4831  | 19.2021  | 5.96273  | 2.15153  | 7.44738  | 13.291   |
| ENSACAP00000002921  | 0        | 1.28916  | 1.29922  | 14.6297  | 1.71019  | 5.50916  |
| ENSACAP00000007627  | 5.92382  | 0        | 0        | 0        | 0        | 0        |
| ENSACAP00000002708  | 2.71426  | 0        | 0        | 1.27604  | 1.70477  | 1.66911  |
| ENSACAP00000002763  | 0.783116 | 0        | 0        | 0.18328  | 0        | 0.402483 |
| ENSACAP00000005027  | 4.79071  | 6.9157   | 3.62064  | 44.6395  | 8.53143  | 10.8816  |
| ENSACAP00000001856  | 0.365067 | 1.90579  | 0        | 0        | 0.127039 | 1.77337  |
| ENSACAP000000015880 | 0.356218 | 0.782121 | 0.826479 | 0.151094 | 0        | 0        |
| ENSACAP00000000416  | 2.65129  | 0.101064 | 0        | 0.076648 | 0.097473 | 1.73328  |
| ENSACAP00000004787  | 0.964013 | 0        | 0        | 0.077158 | 0.056565 | 0.076658 |
| ENSACAP000000018247 | 0.616622 | 6.01E-08 | 0.124082 | 9.29411  | 2.48159  | 5.77E-06 |
| ENSACAP00000008669  | 0.355878 | 0.36603  | 0.274984 | 0.112543 | 16.5119  | 0        |
| ENSACAP000000010793 | 2.30352  | 0        | 0.011117 | 0        | 0.008345 | 0        |
| ENSACAP00000003323  | 3.99237  | 1.98876  | 3.16782  | 9.59885  | 4.09341  | 5.21308  |
| ENSACAP00000005436  | 35.2007  | 22.2951  | 9.04921  | 68.4057  | 35.2578  | 29.6118  |
| ENSACAP00000006257  | 0.383066 | 14.4769  | 2.43678  | 0.164926 | 4.75492  | 14.4277  |
| ENSACAP000000017656 | 28.8265  | 8.99484  | 9.90018  | 26.142   | 23.8436  | 17.0346  |
| ENSACAP000000017054 | 7.13111  | 2.68048  | 1.54418  | 0.680892 | 1.64091  | 1.68799  |
| ENSACAP000000016757 | 17.3509  | 0.110036 | 0        | 0.053535 | 0.045927 | 2.13572  |
| ENSACAP00000003601  | 0        | 0        | 0        | 0.103488 | 0        | 0        |
| ENSACAP000000010527 | 0.031942 | 0        | 0        | 0        | 0        | 0        |
| ENSACAP000000012329 | 3.8463   | 2.97304  | 0.477791 | 11.1629  | 2.81629  | 4.06005  |
| ENSACAP000000017703 | 1.41281  | 0.178898 | 0.448184 | 3.52147  | 0.192449 | 0        |
| ENSACAP000000012425 | 2.52114  | 2.8517   | 0.366878 | 2.71856  | 1.41321  | 2.39419  |
| ENSACAP000000009827 | 0.380333 | 0.905855 | 0.170068 | 1.69447  | 0.162571 | 0.378423 |
| ENSACAP000000017274 | 3.87821  | 0        | 0        | 0        | 0        | 0        |
| ENSACAP00000003019  | 0.401822 | 0.848773 | 0.108623 | 0        | 0.081238 | 0.173513 |



|                    |          |          |          |          |          |          |
|--------------------|----------|----------|----------|----------|----------|----------|
| ENSACAP00000009165 | 0.178457 | 0        | 0        | 0.973775 | 0.13386  | 0.255156 |
| ENSACAP00000009562 | 1.15345  | 1.40259  | 0.493394 | 0.1072   | 0.583526 | 0.397227 |
| ENSACAP00000003757 | 1.59483  | 0.828687 | 0.804387 | 0.050941 | 0.607499 | 0.849438 |
| ENSACAP00000012760 | 0        | 0        | 0        | 0        | 0        | 0        |
| ENSACAP00000012693 | 0.23662  | 0.111057 | 0        | 0        | 0.053468 | 0.257517 |
| ENSACAP00000005126 | 0.439353 | 0.953055 | 0        | 0.198851 | 0.063559 | 7.81614  |
| ENSACAP00000010265 | 13.0495  | 36.9899  | 17.942   | 4.85084  | 31.7864  | 9.35351  |
| ENSACAP00000001609 | 3.58771  | 1.20201  | 0        | 0.05502  | 0.388706 | 3.05081  |
| ENSACAP00000002037 | 0.64033  | 1.1707   | 0.535705 | 1.7495   | 0.951999 | 10.1331  |
| ENSACAP00000003389 | 8.24566  | 9.5825   | 4.75653  | 15.1024  | 4.12357  | 3.5215   |
| ENSACAP00000022629 | 0.284631 | 0.761323 | 0        | 0.000671 | 0.246512 | 6.89062  |
| ENSACAP00000000054 | 4.88552  | 4.64897  | 6.56691  | 85.0674  | 9.17962  | 10.457   |
| ENSACAP00000005208 | 0.076494 | 0.082197 | 0        | 0.014424 | 0.008367 | 0.000391 |
| ENSACAP00000017438 | 0.038427 | 0.123237 | 0        | 2.56E-08 | 0        | 8.02126  |
| ENSACAP00000002866 | 1.65281  | 2.89751  | 0.537452 | 1.38652  | 0.880087 | 2.50757  |
| ENSACAP00000007935 | 0.080245 | 0.058923 | 0        | 0        | 0        | 0.053313 |
| ENSACAP00000004015 | 0        | 0.542509 | 0.141905 | 0        | 0.092937 | 6.03E-07 |
| ENSACAP00000012644 | 4.78085  | 0.561116 | 0.217113 | 0.265075 | 0.666856 | 1.4355   |
| ENSACAP00000005716 | 1.604    | 0        | 0        | 0        | 0        | 0        |
| ENSACAP00000011364 | 3.68509  | 10.5322  | 16.2303  | 14.4947  | 1.9783   | 2.60965  |
| ENSACAP00000017584 | 2.95557  | 0.519955 | 1.08799  | 0.685595 | 1.3321   | 0.745756 |
| ENSACAP00000003403 | 5.69658  | 5.48441  | 1.39273  | 1.3923   | 236.443  | 1.8961   |
| ENSACAP00000005206 | 1.85119  | 0.577923 | 0.466108 | 0.193708 | 0.34263  | 1.12908  |
| ENSACAP00000008692 | 0.334255 | 0.175068 | 0        | 0.134257 | 0        | 0.464169 |
| ENSACAP00000010338 | 6.91937  | 1.39367  | 2.06861  | 0.275555 | 1.55938  | 0.433415 |
| ENSACAP00000023146 | 10.5171  | 5.15008  | 5.67275  | 16.3898  | 8.55197  | 5.90349  |
| ENSACAP00000012150 | 0.1332   | 1.30616  | 0.640857 | 0.271166 | 1.69078  | 0.708337 |
| ENSACAP00000011712 | 0.354837 | 0        | 0        | 0        | 0        | 0        |
| ENSACAP00000011394 | 2.40289  | 0.241302 | 154.111  | 0.721974 | 0.627643 | 0.941314 |
| ENSACAP00000013738 | 1.62147  | 1.76461  | 0.627235 | 9.89592  | 3.70969  | 9.94777  |
| ENSACAP00000011987 | 5.03596  | 0        | 0        | 0        | 0        | 0        |

|                    |          |          |          |          |          |          |
|--------------------|----------|----------|----------|----------|----------|----------|
| ENSACAP00000002985 | 3.4073   | 2.85869  | 0        | 9.73511  | 2.41373  | 2.12805  |
| ENSACAP00000002567 | 5.78031  | 0        | 0        | 0        | 0        | 0        |
| ENSACAP00000011523 | 0        | 0        | 0        | 0        | 0        | 0        |
| ENSACAP00000004222 | 1.08375  | 1.67596  | 0.340785 | 0.139573 | 19.5622  | 1.32011  |
| ENSACAP00000016592 | 1.33391  | 1.21918  | 0.549495 | 9.87196  | 5.32436  | 7.10532  |
| ENSACAP00000011153 | 0.400393 | 375.247  | 0.381975 | 3.74621  | 1.90604  | 16.0727  |
| ENSACAP00000000791 | 1.46219  | 3.50662  | 0.291039 | 21.4067  | 2.28364  | 2.27164  |
| ENSACAP00000009973 | 11.4201  | 11.2381  | 4.81155  | 4.81066  | 7.84898  | 9.76519  |
| ENSACAP00000015188 | 17.9531  | 24.1314  | 15.5415  | 194.93   | 45.5103  | 20.902   |
| ENSACAP00000004636 | 2.97294  | 4.25525  | 1.81048  | 12.2619  | 3.2607   | 16.097   |
| ENSACAP00000013915 | 0        | 2.89415  | 0.105514 | 0        | 0        | 0.053563 |
| ENSACAP00000022437 | 1.47855  | 0.23821  | 0.222717 | 1.48069  | 0.65856  | 0.481304 |
| ENSACAP00000015705 | 6.26825  | 5.99261  | 3.66458  | 11.626   | 9.64675  | 5.55506  |
| ENSACAP00000002190 | 0.949668 | 9.2248   | 5.50074  | 13.5534  | 14.2201  | 13.5605  |
| ENSACAP00000001155 | 6.35044  | 7.28769  | 4.76113  | 67.343   | 5.50468  | 8.69783  |
| ENSACAP00000004955 | 2.90153  | 3.63143  | 0        | 15.7639  | 0.781752 | 1.71731  |
| ENSACAP00000019214 | 4.26022  | 1.17255  | 1.31477  | 2.56202  | 2.50831  | 1.75335  |
| ENSACAP00000000684 | 0        | 0        | 0.113027 | 0.714688 | 0        | 0        |
| ENSACAP00000012511 | 0.133914 | 0.321512 | 0.008323 | 0.291931 | 0.27595  | 4.16448  |
| ENSACAP00000011059 | 1.66618  | 3.25311  | 0.387227 | 0        | 0.419875 | 0.64487  |
| ENSACAP00000012209 | 1.45859  | 0.427891 | 0        | 1.56778  | 0        | 0.118317 |
| ENSACAP00000014754 | 1.74866  | 4.21728  | 0.747545 | 7.39727  | 6.75346  | 4.8955   |
| ENSACAP00000015123 | 9.75622  | 38.4133  | 35.3835  | 14.639   | 24.9233  | 51.2612  |
| ENSACAP00000001943 | 10.7426  | 2.10787  | 2.00133  | 12.3184  | 6.54734  | 10.7633  |
| ENSACAP00000002239 | 0        | 28.3689  | 1.10525  | 0        | 0.545497 | 0.12917  |
| ENSACAP00000014952 | 5.2351   | 0.937466 | 0.342499 | 0.429929 | 0.466739 | 0.700752 |
| ENSACAP00000015149 | 7.52416  | 0.270668 | 0        | 0.861736 | 0.060782 | 0.151728 |
| ENSACAP00000004160 | 37.6426  | 53.4685  | 10.8831  | 27.1449  | 24.8021  | 38.8334  |
| ENSACAP00000007082 | 0        | 0.006096 | 0        | 0        | 0        | 0.007443 |
| ENSACAP00000007057 | 0        | 0.810694 | 0.253082 | 0.40601  | 0.223983 | 0        |
| ENSACAP00000000221 | 0.728497 | 0        | 0        | 0        | 0        | 0        |

|                    |          |          |          |          |          |          |
|--------------------|----------|----------|----------|----------|----------|----------|
| ENSACAP00000015527 | 0.207457 | 10.2841  | 0        | 1.39151  | 0        | 0.600147 |
| ENSACAP00000000379 | 8.65545  | 3.79751  | 0.00713  | 20.5495  | 6.10213  | 9.23281  |
| ENSACAP00000015734 | 7.03373  | 4.36356  | 1.96953  | 1.60691  | 3.15322  | 1.39667  |
| ENSACAP00000000255 | 0.148708 | 1.77602  | 0.388464 | 0        | 0.951314 | 0.062439 |
| ENSACAP00000015446 | 0.214936 | 0        | 0.782197 | 1.59E-09 | 1.93731  | 0.043903 |
| ENSACAP00000009585 | 6.06773  | 1.33568  | 0.940671 | 15.8127  | 1.90125  | 2.7967   |
| ENSACAP00000016228 | 8.7877   | 0.054399 | 0.152311 | 0.11131  | 0.175712 | 2.42624  |
| ENSACAP00000010279 | 1.95471  | 0.497603 | 0        | 0        | 0.072233 | 72.1966  |
| ENSACAP00000011446 | 3.48866  | 3.91217  | 1.7917   | 6.00331  | 5.60961  | 19.885   |
| ENSACAP00000021641 | 0.109423 | 0.080882 | 0        | 0        | 0.001448 | 0        |
| ENSACAP00000000796 | 0.409902 | 0.178413 | 2.74165  | 0        | 1.04443  | 0.532123 |
| ENSACAP00000001682 | 1.19572  | 2.27391  | 2.31012  | 0.589255 | 0.978474 | 0.767976 |
| ENSACAP00000005515 | 0.66398  | 1.18528  | 0.196257 | 0.230967 | 1.05639  | 0.337417 |
| ENSACAP00000003806 | 0.639494 | 0        | 0        | 0        | 0.16774  | 0.378318 |
| ENSACAP00000005087 | 101.674  | 40.6464  | 19.6881  | 29.0051  | 27.1258  | 162.935  |
| ENSACAP00000014677 | 8.65949  | 3.79341  | 3.36301  | 1.7574   | 3.9098   | 4.02386  |
| ENSACAP00000009232 | 0        | 0.315749 | 0        | 0        | 0        | 0.196809 |
| ENSACAP00000015109 | 3.82836  | 0.793209 | 1.27575  | 1.00375  | 1.38375  | 1.65167  |
| ENSACAP00000020710 | 1.22834  | 4.05651  | 0.361851 | 0.130397 | 3.93959  | 0.680353 |
| ENSACAP00000007131 | 0.160081 | 0.31917  | 0.288015 | 1.22586  | 0.15154  | 0.883307 |
| ENSACAP00000013736 | 0.098313 | 0.832698 | 3.87316  | 0.039808 | 1.17212  | 0.921427 |
| ENSACAP00000017662 | 2.18776  | 8.74243  | 0.126186 | 19.1148  | 3.049    | 118.346  |
| ENSACAP00000003905 | 0.893687 | 0        | 1.49867  | 0.208697 | 0.088591 | 0.060224 |
| ENSACAP00000021261 | 11.6768  | 2.77866  | 0.474259 | 0.848791 | 0.450281 | 3.24791  |
| ENSACAP00000014073 | 0        | 1.35647  | 0.075281 | 0        | 0        | 0.023888 |
| ENSACAP00000011883 | 2.35336  | 0.720004 | 0.434707 | 0.892205 | 1.48529  | 1.02757  |
| ENSACAP00000001594 | 0.335525 | 0.530336 | 0.135013 | 0        | 0.104324 | 0.241722 |
| ENSACAP00000009969 | 4.7861   | 2.99249  | 1.92123  | 117.266  | 8.18141  | 37.3207  |
| ENSACAP00000001092 | 7.26602  | 0.069437 | 0        | 0        | 0.893865 | 0.11727  |
| ENSACAP00000013095 | 0.706345 | 1.64117  | 249.354  | 4.31002  | 0.416162 | 0.502726 |
| ENSACAP00000008525 | 0.671866 | 0.833546 | 0.219888 | 0.096731 | 0.304973 | 0.7088   |

|                    |          |          |          |          |          |          |
|--------------------|----------|----------|----------|----------|----------|----------|
| ENSACAP00000016346 | 0.773063 | 0.891358 | 0.374868 | 0.076768 | 4.49248  | 0.701084 |
| ENSACAP00000001332 | 1.64157  | 0        | 0.158595 | 0.049599 | 0.574361 | 1.94304  |
| ENSACAP00000015430 | 4.18201  | 2.24139  | 0.991944 | 24.787   | 4.05041  | 14.9145  |
| ENSACAP00000008830 | 2.1614   | 29.2913  | 0.0551   | 0.008333 | 0.444405 | 1.08332  |
| ENSACAP00000006716 | 0.127148 | 0.194607 | 0.111778 | 0.227218 | 0.177239 | 0        |
| ENSACAP00000016369 | 26.4447  | 90.5094  | 14.4671  | 18.7384  | 90.5018  | 57.5612  |
| ENSACAP00000017354 | 2.8725   | 1.42018  | 1.3604   | 5.13245  | 1.74497  | 1.45748  |
| ENSACAP00000017382 | 0.153389 | 0.016497 | 0.087822 | 2.62552  | 0.360155 | 0        |
| ENSACAP00000008985 | 0.21792  | 0.291099 | 0        | 0.092314 | 0        | 0.170603 |
| ENSACAP00000001757 | 2.65094  | 10.5381  | 3.46715  | 8.48646  | 19.4333  | 10.6226  |
| ENSACAP00000015316 | 22.1778  | 52.6312  | 28.5886  | 50.4968  | 53.0547  | 85.8383  |
| ENSACAP00000000241 | 1.08547  | 0.411796 | 0.087159 | 0.470218 | 0.240068 | 0.420361 |
| ENSACAP00000004226 | 4.72657  | 3.44879  | 2.3174   | 13.4888  | 5.70245  | 5.2786   |
| ENSACAP00000000825 | 0        | 3.77293  | 2.03469  | 0        | 0.026657 | 1.02718  |
| ENSACAP00000002742 | 0.675298 | 2.10916  | 0.257886 | 47.2287  | 3.4296   | 4.1763   |
| ENSACAP00000004168 | 2.57628  | 0.239646 | 0.084683 | 0        | 0.076511 | 0        |
| ENSACAP00000002332 | 0.297081 | 0.713543 | 0.633409 | 2.60627  | 1.18998  | 0        |
| ENSACAP00000017058 | 0.339814 | 0.10744  | 0        | 0.052805 | 0.257621 | 0.155545 |
| ENSACAP00000006621 | 0.728625 | 2.96734  | 0.769154 | 0.145157 | 0.873806 | 1.90893  |
| ENSACAP00000001253 | 6.24554  | 5.13452  | 3.32742  | 38.8433  | 5.22277  | 3.29265  |
| ENSACAP00000004238 | 0.202692 | 0        | 5.75E-10 | 0        | 0.001956 | 0        |
| ENSACAP00000004705 | 1.30867  | 25.2145  | 16.0663  | 67.8015  | 4.92812  | 0.165752 |
| ENSACAP00000006425 | 3.93E-05 | 0.063801 | 0        | 0.031025 | 1.7808   | 3.82792  |
| ENSACAP00000009892 | 0.804388 | 1.15539  | 0.089401 | 2.52384  | 7.32329  | 11.9202  |
| ENSACAP00000016988 | 0        | 4.14635  | 0        | 0        | 0        | 0.040226 |
| ENSACAP00000001231 | 23.9225  | 46.1347  | 40.2894  | 25.0773  | 30.3028  | 24.2329  |
| ENSACAP00000016669 | 1.30844  | 21.2309  | 12.1604  | 8.19852  | 5.03     | 6.95501  |
| ENSACAP00000009086 | 0.143775 | 7.74061  | 0.144602 | 0.362102 | 4.09579  | 1.60236  |
| ENSACAP00000014848 | 9.45735  | 2.70325  | 1948.35  | 5.29214  | 3.82019  | 0.231218 |
| ENSACAP00000010464 | 0        | 99.6445  | 4.74673  | 0        | 0        | 2.46402  |
| ENSACAP00000011045 | 1.52709  | 0        | 0.026708 | 0.122655 | 0.360049 | 0.503374 |

|                    |          |          |          |          |          |          |
|--------------------|----------|----------|----------|----------|----------|----------|
| ENSACAP00000015757 | 12.2973  | 8.60239  | 9.64578  | 16.9381  | 12.9911  | 24.2956  |
| ENSACAP00000006746 | 110.649  | 18.9849  | 12.3918  | 47.1224  | 22.2986  | 29.4596  |
| ENSACAP00000021793 | 23.9503  | 0.087911 | 0.125337 | 0.008273 | 0        | 5.23322  |
| ENSACAP00000012089 | 21.837   | 0.166852 | 0        | 0        | 0.283702 | 0        |
| ENSACAP00000000360 | 5.52625  | 11.0115  | 0.928454 | 9.04136  | 7.04624  | 10.378   |
| ENSACAP00000003974 | 0.980897 | 0.968367 | 0        | 0        | 0.147718 | 3.22355  |
| ENSACAP00000000583 | 9.9588   | 1.73521  | 0.960615 | 2.12086  | 0.396938 | 1.65231  |
| ENSACAP00000007352 | 0.19446  | 0.702171 | 50.702   | 0.019587 | 0.701065 | 1.98734  |
| ENSACAP00000017391 | 37.4824  | 34.5341  | 25.8388  | 25.6889  | 47.7998  | 23.9828  |
| ENSACAP00000001606 | 1.1424   | 0.324032 | 0.185862 | 0.275376 | 0.368644 | 1.09624  |
| ENSACAP00000006180 | 6.75733  | 2.04512  | 1.87909  | 2.91327  | 2.0009   | 1.74646  |
| ENSACAP00000010615 | 0.403341 | 1.95331  | 1.6043   | 0.158551 | 3.78787  | 1.04229  |
| ENSACAP00000017757 | 7.14152  | 0.517792 | 0.249757 | 0.091234 | 0.28174  | 1.2373   |
| ENSACAP00000016251 | 4.43062  | 1.29516  | 3.21248  | 5.05163  | 3.0352   | 6.51467  |
| ENSACAP00000010343 | 0.281753 | 2.30094  | 0.381465 | 4.13236  | 0.053987 | 3.72344  |
| ENSACAP00000013128 | 0        | 0.360803 | 0        | 0.131849 | 0        | 0        |
| ENSACAP00000016340 | 7.87096  | 11.31    | 0.31978  | 0.080758 | 0.507043 | 0.693097 |
| ENSACAP00000007747 | 0.333087 | 0.245565 | 0        | 0        | 0        | 0.322403 |
| ENSACAP00000005936 | 9.19E-11 | 0        | 1.47E-07 | 0        | 0        | 0        |
| ENSACAP00000018161 | 4.49501  | 1.87553  | 0.61708  | 16.3888  | 1.8197   | 4.53164  |
| ENSACAP00000009556 | 0.300749 | 0        | 0.233131 | 0.095775 | 0        | 0.269314 |
| ENSACAP00000001664 | 3.42274  | 9.03337  | 1.79606  | 4.44086  | 4.82025  | 5.61613  |
| ENSACAP00000001455 | 700.57   | 0        | 0.786485 | 0        | 1.73758  | 0        |
| ENSACAP00000006737 | 48.9328  | 48.131   | 11.1434  | 72.9873  | 28.117   | 118.324  |
| ENSACAP00000017717 | 17.3628  | 18.1014  | 2.00433  | 171.25   | 13.4549  | 292.792  |
| ENSACAP00000015276 | 12.6093  | 15.0261  | 16.3029  | 128.268  | 17.3104  | 12.6796  |
| ENSACAP00000015381 | 8.61714  | 22.484   | 1.71642  | 5.81073  | 18.7858  | 7.97784  |

**Table S25. Continuous evolved KEGG pathways in frogs.**

| KEGG pathway | From low to<br>~2000m | From ~2000m to ~3000m | From ~3000m to ~4500m |
|--------------|-----------------------|-----------------------|-----------------------|
|--------------|-----------------------|-----------------------|-----------------------|

|                                                                |                                                           |                                       |                                                  |
|----------------------------------------------------------------|-----------------------------------------------------------|---------------------------------------|--------------------------------------------------|
| ko00030: Pentose phosphate pathway                             | H6PD                                                      | G6PD                                  | ALDOA, TKT                                       |
| ko00120: Primary bile acid biosynthesis                        | CYP27A1                                                   | CYP27A1                               | CYP8B1                                           |
| ko00190: Oxidative phosphorylation                             | SDHA, LHPP                                                | SDHA, NDUFA6                          | NDUFB9, ATP6AP1,<br>COX4I1, ATP6V0A1,<br>ATP6V1H |
| ko00563: Glycosylphosphatidylinositol(GPI)-anchor biosynthesis | PIGX                                                      | PIGX                                  | GPAA1                                            |
| ko00564: Glycerophospholipid metabolism                        | ETNPPL, PLA2G6,<br>PCYT1A, LPCAT4                         | CHKA, ETNK1, LPCAT3                   | PGS1, LPCAT1, GNPAT                              |
| ko01130: Biosynthesis of antibiotics                           | SDHA, IDH3G,<br>IDH3B                                     | SDHA, G6PD, GGPS1,<br>HK2             | ALDOA, HMGCR, TKT                                |
| ko01200: Carbon metabolism                                     | SDHA, IDH3G,<br>H6PD, IDH3B                               | SDHA, G6PD, TKFC,<br>HK2              | ALDOA, TKT                                       |
| ko01212: Fatty acid metabolism                                 | MCAT, ACADL                                               | ACOX1, CPT1B                          | ELOVL5, PPT1                                     |
| ko03008: Ribosome biogenesis in eukaryotes                     | WDR3, NOP56,<br>MDN1                                      | WDR36, WDR3                           | UTP6, LSG1, NOP58,<br>NOP56, GNL3                |
| ko03010: Ribosome                                              | MRPL28,<br>MRPS18A, RPL13A,<br>RPLP1, RPL35,<br>RPS5      | MRPL20                                | RPLP0, RPL15, RPL11                              |
| ko03013: RNA transport                                         | ELAC2, EIF5B,<br>NUP85, THOC5,<br>NUP107, TPR,<br>TGS1    | EEF1A1, EIF3H, PAIP1,<br>NUP93, PNN   | EIF4G3, EIF2B3                                   |
| ko03018: RNA degradation                                       | EDC4                                                      | SKIV2L                                | DIS3, TTC37, DDX6                                |
| ko03050: Proteasome                                            | PSMD12                                                    | PSMB9                                 | PSMB7, PSMA6                                     |
| ko03320: PPAR signaling pathway                                | CYP27A1, ACADL                                            | ACOX1, CPT1B,<br>CYP27A1, RXRA        | CYP8B1                                           |
| ko03420: Nucleotide excision repair                            | POLD2                                                     | XPC                                   | RPA1                                             |
| ko04010: MAPK signaling pathway                                | FGFR1, MAPK8,<br>STMN1, TRAF6                             | ATF4, PPP3CB, FAS                     | FGFR4, RELB, NFATC3,<br>HSPA8                    |
| ko04014: Ras signaling pathway                                 | FGFR1, VEGFA,<br>GRIN1, PLA2G6,<br>MAPK8, PDGFC,<br>EXOC2 | EPHA2                                 | FGFR4                                            |
| ko04015: Rap1 signaling pathway                                | FGFR1, TLN1,<br>VEGFA, GRIN1,                             | TLN1, CTNND1, CDH1,<br>RAPGEF1, EPHA2 | ADCY4, FGFR4, LPAR4,<br>CTNND1, ITGB1            |

|                                                     |                                                        |                                                       |                                                                   |
|-----------------------------------------------------|--------------------------------------------------------|-------------------------------------------------------|-------------------------------------------------------------------|
| ko04020:Calcium signaling pathway                   | CTNND1, PDGFC<br>CCKAR, SLC25A4,<br>GRIN1, PTGFR       | PPIF, SPHK1, PPP3CB,<br>PTGFR, VDAC3, MYLK            | ADCY4, PLCD1                                                      |
| ko04022:cGMP-PKG signaling pathway                  | SLC25A4, PDE3B,<br>ATP1A1                              | PPIF, ATF4, ATF6B,<br>PPP3CB, VDAC3, MYLK             | ADCY4, ROCK2,<br>NFATC3                                           |
| ko04024:cAMP signaling pathway                      | GRIN1, PDE3B,<br>ATP1A1, MAPK8                         | ACOX1                                                 | ADCY4, ROCK2                                                      |
| ko04060:Cytokine-cytokine receptor interaction      | VEGFA, IL17RA,<br>IFNGR1                               | FAS, ACVR1                                            | IFNAR2, IL1RAP,<br>BMPR2                                          |
| ko04064:NF-kappa B signaling pathway                | IRAK4, TNFAIP3,<br>TRAF6, SYK                          | RIPK1                                                 | RELB                                                              |
| ko04071:Sphingolipid signaling pathway              | BID, MAPK8                                             | SPHK1                                                 | ROCK2                                                             |
| ko04080:Neuroactive ligand-receptor interaction     | CCKAR, GLRB,<br>GRIN1, CHRN3,<br>PTGFR                 | GRM6, PTGFR                                           | GRIK3, LPAR4, NR3C1                                               |
| ko04110:Cell cycle                                  | RAD21, CDC20                                           | SMC1A                                                 | SMC1A, STAG1                                                      |
| ko04114:Oocyte meiosis                              | CDC20                                                  | PPP3CB, SMC1A                                         | ADCY4, SMC1A                                                      |
| ko04115:p53 signaling pathway                       | BID                                                    | FAS                                                   | RFWD2, RRM2B                                                      |
| ko04120:Ubiquitin mediated proteolysis              | PPIL2, CDC20,<br>KEAP1, TRAF6,<br>UBE2U                | UBE4B                                                 | RFWD2                                                             |
| ko04141:Protein processing in endoplasmic reticulum | HSPH1, PDIA3,<br>VCP, UFD1L,<br>MAPK8, PDIA4,<br>SAR1A | NPLOC4, ATF4, UBE4B,<br>ATF6B, RPN2, SEL1L            | SEC24B, HSPA8                                                     |
| ko04142:Lysosome                                    | CTSK, AP1G1,<br>LGMN, GALC,<br>CLN5                    | CTSK, LIPA, LGMN                                      | CTSK, ATP6AP1,<br>ATP6V0A1, ATP6V1H,<br>PPT1                      |
| ko04144:Endocytosis                                 | HGS, VPS35,<br>TRAF6,<br>RAB11FIP1, EPN1               | CHMP2A                                                | FGFR4, AP2A1,<br>KIAA0196, RUFY1,<br>VPS35, CYTH2, HSPA8,<br>DNM1 |
| ko04146:Peroxisome                                  | SOD1                                                   | ACOX1                                                 | GNPAT                                                             |
| ko04151:PI3K-Akt signaling pathway                  | FGFR1, COL3A1,<br>VEGFA, COL1A2,<br>PDGFC, PRKAA1,     | ATF4, TNC, RXRA,<br>COL3A1, ATF6B,<br>COL1A1, COL4A6, | IFNAR2, FGFR4,<br>COL6A3, COL1A2,<br>LPAR4, COL6A1, ITGB1,        |

|                                                                  |                                           |                                                       |                                                               |
|------------------------------------------------------------------|-------------------------------------------|-------------------------------------------------------|---------------------------------------------------------------|
| ko04152:AMPK signaling pathway                                   | SYK                                       | EPHA2                                                 | THBS2, COL5A1, FN1                                            |
| ko04261:Adrenergic signaling in cardiomyocytes                   | EEF2, PRKAA1                              | CPT1B                                                 | HMGCR, ADIPOR1, EEF2                                          |
| ko04270:Vascular smooth muscle contraction                       | ATP1A1                                    | ATF4, SCN1B, ATF6B                                    | ADCY4                                                         |
| ko04310:Wnt signaling pathway                                    | PLA2G6                                    | MYLK                                                  | ADCY4, ROCK2                                                  |
| ko04360:Axon guidance                                            | MAPK8                                     | PPP3CB                                                | ROCK2, NFATC3, FZD6                                           |
| ko04380:Osteoclast differentiation                               | SEMA4D, EPHB3                             | SEMA3D, PPP3CB, EPHA2                                 | EPHA4, ROCK2, PLXNB2, NTN4, NFATC3, ITGB1                     |
| ko04390:Hippo signaling pathway                                  | CTSK, MAPK8, TRAF6, IFNGR1, SYK           | CTSK, PPP3CB                                          | IFNAR2, CTSK, RELB                                            |
| ko04510:Focal adhesion                                           | SAV1                                      | BMP4, CDH1                                            | BMPR2, FZD6                                                   |
| ko04512:ECM-receptor interaction                                 | TLN1, COL3A1, VEGFA, COL1A2, MAPK8, PDGFC | TLN1, TNC, COL3A1, COL1A1, RAPGEF1, COL4A6, MYLK, VCL | ROCK2, COL6A3, COL1A2, COL6A1, ITGB1, THBS2, COL5A1, VCL, FN1 |
| ko04514:Cell adhesion molecules (CAMs)                           | CD44, COL3A1, HSPG2, COL1A2               | CD44, TNC, COL3A1, COL1A1, COL4A6                     | COL6A3, COL1A2, COL6A1, ITGB1, THBS2, COL5A1, FN1             |
| ko04520:Adherens junction                                        | PECAM1, CNTN2, NRXN1                      | CD99, CDH1, NEO1                                      | MPZL1, VCAN, ITGB1, CDH4                                      |
| ko04550:Signaling pathways regulating pluripotency of stem cells | FGFR1, BAIAP2, CTNND1, LMO7               | CTNND1, CDH1, VCL                                     | CTNND1, VCL                                                   |
| ko04610:Complement and coagulation cascades                      | FGFR1                                     | BMP4, LHX5, ACVR1                                     | FGFR4, BMPR2, ZFHX3, FZD6                                     |
| ko04611:Platelet activation                                      | C7, FGG, F5, SERPINC1, SERPIND1           | C1QA, PLAT                                            | SERPIND1, F7                                                  |
| ko04612:Antigen processing and presentation                      | FGG, TLN1, COL3A1, COL1A2, SYK            | TLN1, COL3A1, COL1A1, MYLK                            | ADCY4, ROCK2, COL1A2, ITGB1, COL5A1                           |
| ko04620:Toll-like receptor signaling pathway                     | PDIA3, LGMN                               | LGMN, NFYC                                            | HSPA8                                                         |
| ko04622:RIG-I-like receptor signaling pathway                    | IRAK4, CTSK, MAPK8, TRAF6                 | CTSK, RIPK1                                           | IFNAR2, CTSK                                                  |
|                                                                  | MAPK8, TRAF6                              | TKFC, RIPK1, NLRX1                                    | AZI2                                                          |



|                                                                   |                                 |                                |                                |
|-------------------------------------------------------------------|---------------------------------|--------------------------------|--------------------------------|
| ko04650:Natural killer cell mediated cytotoxicity                 | BID, IFNGR1, SYK                | PPP3CB, FAS                    | IFNAR2                         |
| ko04662:B cell receptor signaling pathway                         | SYK                             | PPP3CB, CD79A                  | NFATC3                         |
| ko04670:Leukocyte transendothelial migration                      | EZR, PECAM1, CTNND1, THY1       | EZR, CTNND1, CD99, VCL         | ROCK2, CTNND1, ITGB1, VCL      |
| ko04721:Synaptic vesicle cycle                                    | SYT1, STX3                      | NSF                            | AP2A1, ATP6V0A1, ATP6V1H, DNMI |
| ko04724:Glutamatergic synapse                                     | GRIN1                           | GRM6, PPP3CB                   | ADCY4, GRIK3, GLS              |
| ko04810:Regulation of actin cytoskeleton                          | FGFR1, EZR, BAIAP2, PDGFC       | EZR, MYLK, VCL                 | FGFR4, ROCK2, ITGB1, VCL, FN1  |
| ko04911:Insulin secretion                                         | CCKAR, ATP1A1                   | ATF4, ATF6B                    | ADCY4, KCNJ11                  |
| ko04912:GnRH signaling pathway                                    | MAPK8                           | ATF4                           | ADCY4                          |
| ko04915:Estrogen signaling pathway                                | FKBP4                           | ATF4, ATF6B                    | ADCY4, HSPA8                   |
| ko04918:Thyroid hormone synthesis                                 | ATP1A1, PDIA4, IYD              | SLC26A4, ATF4, ATF6B           | ADCY4                          |
| ko04919:Thyroid hormone signaling pathway                         | SIN3A, ATP1A1                   | RXRA, MED24                    | PLCD1                          |
| ko04920:Adipocytokine signaling pathway                           | MAPK8, PRKAA1                   | CPT1B, RXRA                    | ADIPOR1                        |
| ko04921:Oxytocin signaling pathway                                | EEF2, PRKAA1                    | PPP3CB, MYLK                   | ADCY4, ROCK2, EEF2, NFATC3     |
| ko04925:Aldosterone synthesis and secretion                       | SCARB1                          | ATF4, ATF6B, ATF1              | ADCY4, SCARB1                  |
| ko04930:Type II diabetes mellitus                                 | MAPK8                           | HK2                            | KCNJ11                         |
| ko04932:Non-alcoholic fatty liver disease (NAFLD)                 | BID, SDHA, MAPK8, PRKAA1        | SDHA, ATF4, NDUFA6, RXRA, FAS  | NDUFB9, COX4I1, ADIPOR1        |
| ko04961:Endocrine and other factor-regulated calcium reabsorption | ATP1A1                          | CALB1                          | AP2A1, CALB1, DNMI             |
| ko04962:Vasopressin-regulated water reabsorption                  | STX4                            | NSF                            | AQP3                           |
| ko04971:Gastric acid secretion                                    | EZR, ATP1A1                     | EZR, MYLK                      | ADCY4                          |
| ko04973:Carbohydrate digestion and absorption                     | ATP1A1                          | HK2                            | SLC37A4                        |
| ko04974:Protein digestion and absorption                          | COL3A1, COL1A2, ATP1A1, XPNPEP2 | COL9A3, COL3A1, COL1A1, COL4A6 | COL6A3, COL1A2, COL6A1, COL5A1 |
| ko04976:Bile secretion                                            | ATP1A1, SCARB1                  | RXRA, ABCC3                    | ADCY4, HMGCR, SCARB1           |
| ko05010:Alzheimer's disease                                       | BID, SDHA, GRIN1                | SDHA, NDUFA6, PPP3CB, FAS      | NDUFB9, ADAMI7, COX4I1         |
| ko05012:Parkinson's disease                                       | SDHA, SLC25A4                   | SDHA, PPIF, NDUFA6, VDAC3      | NDUFB9, COX4I1                 |

|                                                 |                                                    |                                 |                                       |
|-------------------------------------------------|----------------------------------------------------|---------------------------------|---------------------------------------|
| ko05016:Huntington's disease                    | SDHA, SIN3A, SLC25A4, GRIN1, SOD1                  | SDHA, PPIF, NDUFA6, VDAC3       | AP2A1, NDUFB9, COX4I1                 |
| ko05133:Pertussis                               | IRAK4, MAPK8, TRAF6                                | C1QA                            | ITGB1                                 |
| ko05134:Legionellosis                           | VCP, SAR1A                                         | EEF1A1, BCL2L13                 | HSPA8                                 |
| ko05145:Toxoplasmosis                           | IRAK4, MAPK8, TRAF6, IFNGR1                        | PPIF                            | ITGB1, HSPA8                          |
| ko05146:Amoebiasis                              | COL3A1, COL1A2                                     | COL3A1, COL1A1, COL4A6, VCL     | COL1A2, COL5A1, VCL, FN1              |
| ko05152:Tuberculosis                            | BID, IRAK4, MAPK8, TRAF6, IFNGR1, SYK              | SPHK1, PPP3CB, NFYC             | ATP6AP1, ATP6V0A1, ATP6V1H            |
| ko05160:Hepatitis C                             | MAPK8, SCARB1, TRAF6                               | RIPK1, RXRA                     | IFNAR2, SCARB1                        |
| ko05161:Hepatitis B                             | HSPG2, MAPK8                                       | ATF4, ATF6B, FAS, VDAC3         | ATP6AP1, NFATC3                       |
| ko05162:Measles                                 | IRAK4, TNFAIP3, TRAF6, IFNGR1                      | EIF3H, FAS                      | IFNAR2, HSPA8                         |
| ko05164:Influenza A                             | IRAK4, MAPK8, IFNGR1                               | NLRX1, FAS                      | IFNAR2, HSPA8                         |
| ko05166:HTLV-I infection                        | TLN1, SLC25A4, POLD2, CDC20                        | TLN1, ATF4, PPP3CB, VDAC3, ATF1 | ADCY4, RELB, NFATC3, FZD6             |
| ko05168:Herpes simplex infection                | HMGNI, MAPK8, TRAF6, IFNGR1                        | CFP, FAS                        | IFNAR2, TAF10                         |
| ko05169:Epstein-Barr virus infection            | CD44, PSMD12, MAPK8, TNFAIP3, TRAF6, SYK           | CD44, RIPK1                     | SND1, RELB, HSPA8                     |
| ko05200:Pathways in cancer                      | BID, CCDC6, FGFR1, STK36, VEGFA, MAPK8, TPR, TRAF6 | BMP4, RXRA, CDH1, FAS, COL4A6   | ADCY4, ROCK2, LPAR4, ITGB1, FZD6, FN1 |
| ko05202:Transcriptional misregulation in cancer | MEN1, SIN3A, SPINT1                                | PLAT, RXRA, PBX1, ATF1          | FUS, CDK14                            |
| ko05203:Viral carcinogenesis                    | CDC20, SYK                                         | HPN, ATF4, ATF6B, VDAC3         | GTF2A1, SND1                          |
| ko05205:Proteoglycans in cancer                 | FGFR1, EZR, CD44,                                  | EZR, CD44, FAS, PDCD4           | ROCK2, ITGB1, FZD6,                   |

|                                             |                            |                       |                                     |
|---------------------------------------------|----------------------------|-----------------------|-------------------------------------|
|                                             | VEGFA, HSPG2               |                       | FN1                                 |
| ko05206:MicroRNAs in cancer                 | EZR, CD44,<br>VEGFA, STMN1 | EZR, CD44, TNC, PDCD4 | GLS, BMPR2                          |
| ko05217:Basal cell carcinoma                | STK36                      | BMP4                  | FZD6                                |
| ko05222:Small cell lung cancer              | TRAF6                      | RXRA, COL4A6          | ITGB1, FN1                          |
| ko05230:Central carbon metabolism in cancer | FGFR1                      | G6PD, HK2, SIRT6      | GLS                                 |
| ko05231:Choline metabolism in cancer        | PCYT1A, MAPK8,<br>PDGFC    | CHKA                  | SLC44A2                             |
| ko05323:Rheumatoid arthritis                | CTSK, VEGFA                | CTSK                  | CTSK, ATP6AP1,<br>ATP6V0A1, ATP6V1H |

**Table S26. Continuous evolved KEGG pathways in lizards.**

| KEGG pathway                              | From low to<br>~2000m       | From ~2000m to<br>~3000m | From ~3000m to<br>~4500m    |
|-------------------------------------------|-----------------------------|--------------------------|-----------------------------|
| ko00010:Glycolysis / Gluconeogenesis      | PGM2, HKDC1                 | HKDC1                    | PFKM                        |
| ko00030:Pentose phosphate pathway         | PGM2, PRPS2                 | PRPS2                    | PFKM, PRPS2                 |
| ko00051:Fructose and mannose metabolism   | HKDC1                       | HKDC1                    | PFKM                        |
| ko00052:Galactose metabolism              | PGM2, HKDC1                 | HKDC1                    | PFKM                        |
| ko00230:Purine metabolism                 | PGM2, POLR3A,<br>PRPS2      | ADK, GUCY1B3,<br>PRPS2   | PRPS2                       |
| ko00564:Glycerophospholipid metabolism    | PGS1                        | LCLAT1                   | PGS1                        |
| ko01130:Biosynthesis of antibiotics       | PGM2, HKDC1,<br>FDPS, PRPS2 | HKDC1, PRPS2             | PFKM, PRPS2                 |
| ko01200:Carbon metabolism                 | HKDC1, PRPS2                | HKDC1, PRPS2             | PFKM, PRPS2                 |
| ko01230:Biosynthesis of amino acids       | PRPS2                       | PRPS2                    | PFKM, PRPS2                 |
| ko03008:Ribosome biogenesis in eukaryotes | UTP15                       | MPHOSPH10                | WDR36                       |
| ko04010:MAPK signaling pathway            | TGFBR1                      | RAC1                     | FGFR2, ELK4,<br>RAC1, MAPK8 |
| ko04015:Rap1 signaling pathway            | GNAI1, LCP2                 | RAC1, LCP2               | FGFR2, RAC1                 |
| ko04024:cAMP signaling pathway            | GNAI1                       | RAC1                     | RAC1, MAPK8                 |
| ko04062:Chemokine signaling pathway       | GNAI1                       | RAC1, JAK2               | RAC1                        |
| ko04071:Sphingolipid signaling pathway    | GNAI1                       | FYN, RAC1,<br>PPP2R2A    | RAC1, MAPK8                 |

|                                                                  |                                   |                     |                    |
|------------------------------------------------------------------|-----------------------------------|---------------------|--------------------|
| ko04144:Endocytosis                                              | TGFBR1, CHMP7, KIF5C, RUFY1, EPN2 | CHMP7, DNM2, EHD4   | FGFR2, AGAP2       |
| ko04151:PI3K-Akt signaling pathway                               | JAK1                              | RAC1, JAK2, PPP2R2A | FGFR2, RAC1        |
| ko04152:AMPK signaling pathway                                   | CCNA2                             | PPP2R2A             | PFKM               |
| ko04360:Axon guidance                                            | GNAI1                             | FYN, RAC1           | RAC1               |
| ko04380:Osteoclast differentiation                               | TGFBR1, JAK1, LCP2                | FYN, RAC1, LCP2     | RAC1, MAPK8        |
| ko04520:Adherens junction                                        | TGFBR1                            | FYN, RAC1           | RAC1               |
| ko04550:Signaling pathways regulating pluripotency of stem cells | INHBE, JAK1                       | JAK2                | FGFR2              |
| ko04622:RIG-I-like receptor signaling pathway                    | RNF125                            | FADD                | MAPK8              |
| ko04650:Natural killer cell mediated cytotoxicity                | LCP2                              | FYN, RAC1, LCP2     | RAC1               |
| ko04662:B cell receptor signaling pathway                        | CD79A                             | RAC1                | RAC1               |
| ko04664:Fc epsilon RI signaling pathway                          | LCP2                              | FYN, RAC1, LCP2     | RAC1, MAPK8        |
| ko04670:Leukocyte transendothelial migration                     | GNAI1                             | RAC1                | RAC1               |
| ko04721:Synaptic vesicle cycle                                   | CPLX1                             | DNM2                | STX1B              |
| ko04728:Dopaminergic synapse                                     | GNAI1, KIF5C                      | PPP2R2A             | MAPK8              |
| ko04910:Insulin signaling pathway                                | HKDC1                             | PPP1R3B, HKDC1      | MAPK8              |
| ko04930:Type II diabetes mellitus                                | HKDC1                             | HKDC1               | MAPK8              |
| ko05142:Chagas disease (American trypanosomiasis)                | GNAI1, TGFBR1                     | FADD, PPP2R2A       | MAPK8              |
| ko05145:Toxoplasmosis                                            | GNAI1, JAK1                       | JAK2                | MAPK8              |
| ko05152:Tuberculosis                                             | JAK1                              | FADD, JAK2          | MAPK8              |
| ko05160:Hepatitis C                                              | JAK1                              | PPP2R2A             | MAPK8              |
| ko05161:Hepatitis B                                              | TGFBR1, JAK1, CCNA2               | FADD                | MAPK8              |
| ko05164:Influenza A                                              | FDPS, JAK1, Tmprss13              | JAK2                | MAPK8              |
| ko05168:Herpes simplex infection                                 | JAK1, PER1                        | FADD, JAK2          | MAPK8              |
| ko05169:Epstein-Barr virus infection                             | JAK1, POLR3A, CCNA2               | VIM                 | MAPK8              |
| ko05200:Pathways in cancer                                       | GNAI1, TGFBR1, JAK1               | RAC1, FADD          | FGFR2, RAC1, MAPK8 |

|                                             |                              |       |             |
|---------------------------------------------|------------------------------|-------|-------------|
| ko05203:Viral carcinogenesis                | HDAC3, JAK1,<br>HDAC8, CCNA2 | RAC1  | RAC1        |
| ko05210:Colorectal cancer                   | TGFBR1                       | RAC1  | RAC1, MAPK8 |
| ko05212:Pancreatic cancer                   | TGFBR1, JAK1                 | RAC1  | RAC1, MAPK8 |
| ko05230:Central carbon metabolism in cancer | HKDC1                        | HKDC1 | FGFR2, PFKM |

**Table S27. Categories showed evolutionary convergence between the frogs and lizards at elevation around 2000 m.**

| category   | pvalue      | numDE<br>InCat | numIn<br>Cat | term                                                  | Frog PSGs                                                 | Lizard PSGs                                                    |
|------------|-------------|----------------|--------------|-------------------------------------------------------|-----------------------------------------------------------|----------------------------------------------------------------|
| GO:0070507 | 9.81E-07    | 15             | 119          | regulation of microtubule cytoskeleton organization   | ECT2,BORA,CDK5R1,PAFAH1B1,ENSACAG00000012696,RNF4,FAM179B | FKBP4,HSPH1,PARP3,KATNB1,STIL,STMN1,TPR,CEP120                 |
| GO:0032886 | 1.48E-05    | 15             | 144          | regulation of microtubule-based process               | ECT2,BORA,CDK5R1,PAFAH1B1,ENSACAG00000012696,RNF4,FAM179B | FKBP4,HSPH1,PARP3,KATNB1,STIL,STMN1,TPR,CEP120                 |
| GO:0034116 | 0.000115086 | 3              | 4            | positive regulation of heterotypic cell-cell adhesion | GCNT2                                                     | FGG,FLOT1                                                      |
| GO:0009451 | 0.000152631 | 12             | 122          | RNA modification                                      | TRMU,MTO1,RPUSD4,FTSJ2,TRUB2,TRDMT1                       | TYW5,TRMT61B,THUMPD3,MOCS3,NOP56,TGS1                          |
| GO:0051660 | 0.000308287 | 3              | 5            | establishment of centrosome localization              | PAFAH1B1                                                  | CEP83,EZR                                                      |
| GO:0000963 | 0.000325271 | 4              | 11           | mitochondrial RNA processing                          | TRMU,MTO1                                                 | ELAC2,TRMT61B                                                  |
| GO:0006364 | 0.000333132 | 13             | 165          | rRNA processing                                       | UTP15,EXOSC8,DIEXF,WDR18,FTSJ2                            | UTP20,MDN1,RPS5,DIEXF,RP L13A,WDR3,SART1,NOP56,CIRH1A          |
| GO:0015931 | 0.000671108 | 12             | 141          | nucleobase-containing compound transport              | MCM3AP,RANBP17,MRPL18,KIF5C                               | ENSACAG00000002091,NUP85,SLC25A26,RBMX2,THOC5,TPR,NUP107,FLOT1 |
| GO:0050658 | 0.000831435 | 11             | 124          | RNA transport                                         | MCM3AP,RANBP17,MRPL18,KIF5C                               | ENSACAG00000002091,NUP85,RBMX2,THOC5,TPR,NUP107,FLOT1          |
| GO:0051103 | 0.000941995 | 3              | 7            | DNA ligation involved in DNA                          | LIG4                                                      | PARP3,PARP1                                                    |

|            |             |    |     |                                                                          |                           |                                                                                      |
|------------|-------------|----|-----|--------------------------------------------------------------------------|---------------------------|--------------------------------------------------------------------------------------|
| GO:1904851 | 0.00096647  | 2  | 2   | repair                                                                   | WRAP53                    | CCT4                                                                                 |
| GO:0000959 | 0.001099414 | 5  | 27  | positive regulation of establishment of protein localization to telomere | TRMU,MTO1                 | ELAC2,TRMT61B,POLRMT                                                                 |
| GO:0022406 | 0.001366209 | 7  | 65  | mitochondrial RNA metabolic process                                      | ENSACAG00000011849        | CEP83,STX3,EZR,NRXN1,STX4,STX12                                                      |
| GO:0006266 | 0.001842718 | 3  | 9   | membrane docking                                                         | LIG4                      | PARP3,PARP1                                                                          |
| GO:0006302 | 0.002091915 | 11 | 138 | DNA ligation                                                             | EXD2,LIG4,CCDC155,DCLRE1A | NSMCE1,XRCC6,SFR1,DTX3L,PARP3,VCP,RAD21                                              |
| GO:0021819 | 0.002126566 | 3  | 10  | double-strand break repair                                               | CDK5R1,PAFAH1B1           | SOCS7                                                                                |
| GO:0070525 | 0.002173845 | 3  | 9   | layer formation in cerebral cortex                                       | TRMU,MTO1                 | TRMT61B                                                                              |
| GO:0048278 | 0.002435528 | 6  | 54  | tRNA threonylcarbamoyladenosine metabolic process                        | ENSACAG00000011849        | CEP83,STX3,NRXN1,STX4,STX12                                                          |
| GO:0043622 | 0.002600473 | 2  | 3   | vesicle docking                                                          | PAFAH1B1                  | EZR                                                                                  |
| GO:0002098 | 0.002780466 | 3  | 10  | cortical microtubule organization                                        | TRMU,MTO1                 | MOCS3                                                                                |
| GO:0051169 | 0.003141844 | 13 | 188 | tRNA wobble uridine modification                                         | RSRC1,MCM3AP,RANBP17      | NSRP1,ENSACAG00000002091,NUP85,HTATIP2,RBMX2,THOC5,NOC2L,TPR,NUP107,TGS1             |
| GO:0050892 | 0.003329579 | 4  | 20  | nuclear transport                                                        | TJP2                      | PLS1,EZR,SCARB1                                                                      |
| GO:0022411 | 0.00370738  | 12 | 175 | intestinal absorption                                                    | PAFAH1B1                  | MMP19,HSPG2,CDK5RAP3,ENSACAG00000017760,MTIF2,STMN1,C12orf65,TPR,NUP107,MRPL48,FLOT1 |
| GO:0034227 | 0.0038338   | 2  | 4   | cellular component disassembly                                           | TRMU                      | MOCS3                                                                                |
| GO:0051170 | 0.004049954 | 8  | 87  | tRNA thio-modification                                                   | MCM3AP,RANBP17            | ENSACAG00000002091,NUP85,HTATIP2,TPR,NUP107,TGS1                                     |
| GO:0006413 | 0.004247735 | 7  | 86  | nuclear import                                                           | EIF4H                     | RPS5,MTIF2,RPL13A,ENSACAG00000004291,ENSACAG000010260,MRPS18A                        |
|            |             |    |     | translational initiation                                                 |                           |                                                                                      |

|            |             |    |     |                                                                                                     |                                 |                                                                                     |
|------------|-------------|----|-----|-----------------------------------------------------------------------------------------------------|---------------------------------|-------------------------------------------------------------------------------------|
| GO:0042249 | 0.004399966 | 2  | 4   | establishment of planar polarity of embryonic epithelium                                            | PAFAH1B1                        | CTHRC1                                                                              |
| GO:0032873 | 0.004432051 | 5  | 38  | negative regulation of stress-activated MAPK cascade                                                | PER1,PAFAH1B1                   | HSPH1,EZR,MEN1                                                                      |
| GO:0006457 | 0.004496455 | 11 | 168 | protein folding                                                                                     | PPIL2,PPIA                      | PPIL2,PDIA4,ENSACAG00000002091,FKBP4,PRDX4,HSPH1,CCT4,ENSACAG00000017064,TBCE,PDIA3 |
| GO:0043928 | 0.005148158 | 3  | 14  | exonucleolytic nuclear-transcribed mRNA catabolic process involved in deadenylation-dependent decay | EXOSC8,DCP1B                    | EDC4                                                                                |
| GO:0002097 | 0.005261194 | 3  | 13  | tRNA wobble base modification                                                                       | TRMU,MTO1                       | MOCS3                                                                               |
| GO:0051764 | 0.005373639 | 3  | 11  | actin crosslink formation                                                                           | BAIAP2L1                        | PLS1,BAIAP2                                                                         |
| GO:0006488 | 0.005527815 | 3  | 14  | dolichol-linked oligosaccharide biosynthetic process                                                | ALG8                            | ALG3,DPAGT1                                                                         |
| GO:0000413 | 0.00589066  | 3  | 16  | protein peptidyl-prolyl isomerization                                                               | PPIL2,PPIA                      | PPIL2,ENSACAG00000017064                                                            |
| GO:0071897 | 0.006255193 | 6  | 56  | DNA biosynthetic process                                                                            | TOP3A,LIG4,CTGF                 | UFD1L,TK1,VCP                                                                       |
| GO:0070527 | 0.006408357 | 4  | 29  | platelet aggregation                                                                                | RAP2B                           | MYH9,FGG,GATA1                                                                      |
| GO:0051017 | 0.007095854 | 5  | 40  | actin filament bundle assembly                                                                      | BAIAP2L1                        | PLS1,ADD1,BAIAP2,EZR                                                                |
| GO:0008299 | 0.007285847 | 4  | 28  | isoprenoid biosynthetic process                                                                     | FDPS                            | COQ2,DPAGT1,ENSACAG00000003142                                                      |
| GO:0007062 | 0.007347437 | 7  | 76  | sister chromatid cohesion                                                                           | CENPC,BUB1,PAFAH1B1,HDAC8       | CENPH,RAD21,NUP107                                                                  |
| GO:0046471 | 0.00748545  | 3  | 16  | phosphatidylglycerol metabolic process                                                              | PGS1                            | LPCAT4,PLA2G6                                                                       |
| GO:0050994 | 0.007743878 | 4  | 27  | regulation of lipid catabolic process                                                               | LONP2                           | PRKAA1,PDE3B,SCARB1                                                                 |
| GO:0032530 | 0.008884901 | 3  | 14  | regulation of microvillus organization                                                              | ENSACAG00000006885              | PLS1,EZR                                                                            |
| GO:0000086 | 0.009182437 | 7  | 77  | G2/M transition of mitotic cell cycle                                                               | BORA,HAUS6,HMMR,PAFAH1B1,CCP110 | KDM8,NEDD1                                                                          |
| GO:0000075 | 0.009630994 | 9  | 123 | cell cycle checkpoint                                                                               | GIGYF2,XPC,BUB1                 | CDK5RAP3,RAD17,SPDL1,ENSACAG00000013691,TPR,C HFR                                   |

|            |             |    |     |                                                                 |                                         |                                                                    |
|------------|-------------|----|-----|-----------------------------------------------------------------|-----------------------------------------|--------------------------------------------------------------------|
| GO:0000291 | 0.009775576 | 3  | 18  | nuclear-transcribed mRNA catabolic process, exonucleolytic      | EXOSC8,DCP1B                            | EDC4                                                               |
| GO:0017038 | 0.010124882 | 8  | 108 | protein import                                                  | ENSACAG00000011849,MCM3AP,RANBP17,LONP2 | ENSACAG00000002091,NUP85,TPR,NUP107                                |
| GO:0051382 | 0.010477716 | 2  | 8   | kinetochore assembly                                            | CENPC                                   | CENPH                                                              |
| GO:0051383 | 0.010477716 | 2  | 8   | kinetochore organization                                        | CENPC                                   | CENPH                                                              |
| GO:0046085 | 0.01069666  | 3  | 16  | adenosine metabolic process                                     | TRMU,MTO1                               | TRMT61B                                                            |
| GO:0050730 | 0.011320676 | 8  | 108 | regulation of peptidyl-tyrosine phosphorylation                 | RAP2B                                   | SRCIN1,GAS6,HSPH1,SEMA4D,GATA1,CTNND1,VEGFA                        |
| GO:0021930 | 0.011542396 | 2  | 6   | cerebellar granule cell precursor proliferation                 | PSMG1                                   | RERE                                                               |
| GO:0042752 | 0.011656016 | 6  | 64  | regulation of circadian rhythm                                  | ARNTL2,PER1                             | FBXL3,PRKAA1,SIN3A,MAPK8                                           |
| GO:0050900 | 0.011960947 | 9  | 130 | leukocyte migration                                             | PPIL2                                   | PPIL2,IL17RA,MYH9,IRAK4,GAS6,ANXA1,NUP85,ENSACAG00000006445,PECAM1 |
| GO:0061001 | 0.012037255 | 4  | 27  | regulation of dendritic spine morphogenesis                     | CDK5R1,PAFAH1B1                         | SRCIN1,KALRN                                                       |
| GO:0090277 | 0.01223131  | 5  | 53  | positive regulation of peptide hormone secretion                | ENSACAG00000011849                      | FGG,STX4,PLA2G6,CCKAR                                              |
| GO:0006515 | 0.012291356 | 3  | 18  | misfolded or incompletely synthesized protein catabolic process | RNF126,LONP2                            | UFD1L                                                              |
| GO:0060249 | 0.012745447 | 10 | 154 | anatomical structure homeostasis                                | GIGYF2,GCNT2,DCLRE1A                    | XRCC6,ADD1,GATA1,TRAF6,ADGRF5,PARP3,BBS10                          |
| GO:0043547 | 0.012808641 | 7  | 91  | positive regulation of GTPase activity                          | ECT2,ENSACAG00000006885                 | SEMA4D,SNX9,ENSACAG0000015364,THY1,ENSACAG0000001557               |
| GO:0030048 | 0.012891355 | 5  | 44  | actin filament-based movement                                   | FRMD6,FRMD1                             | MYH9,MYO1A,MYO1E                                                   |
| GO:0072376 | 0.013415824 | 6  | 94  | protein activation cascade                                      | ENSACAG00000026198                      | FGG,ENSACAG00000010314,C7,ENSACAG00000017760,ENSACAG00000007857    |
| GO:0045088 | 0.013538657 | 11 | 173 | regulation of innate immune                                     | JAK1,NMI                                | TRAFD1,IRAK4,SAMHD1,EN                                             |



|            |             |    | response |                                                                                                 |                                                   |                                                                             |
|------------|-------------|----|----------|-------------------------------------------------------------------------------------------------|---------------------------------------------------|-----------------------------------------------------------------------------|
|            |             |    |          |                                                                                                 |                                                   | SACAG00000017760,SIN3A,T<br>NFAIP3,IFNGR1,ENSACAG00<br>000006445,AP1G1      |
| GO:0072524 | 0.013543229 | 5  | 54       | pyridine-containing compound<br>metabolic process                                               | APOA1BP,PGM2                                      | IDH3G,H6PD,IDH3B                                                            |
| GO:0032049 | 0.014464779 | 2  | 7        | cardiolipin biosynthetic process                                                                | PGS1                                              | PLA2G6                                                                      |
| GO:0001894 | 0.016528339 | 7  | 95       | tissue homeostasis                                                                              | GIGYF2,GCNT2                                      | ADD1,GATA1,TRAF6,ADGRF<br>5,BBS10                                           |
| GO:0031532 | 0.01755094  | 5  | 53       | actin cytoskeleton reorganization                                                               | NPHS2                                             | MYH9,ANXA1,EZR,CCKAR                                                        |
| GO:0002118 | 0.018447881 | 2  | 8        | aggressive behavior                                                                             | PENK                                              | GCNT4                                                                       |
| GO:0071295 | 0.018632268 | 2  | 9        | cellular response to vitamin                                                                    | PENK                                              | GAS6                                                                        |
| GO:0050905 | 0.019518264 | 6  | 72       | neuromuscular process                                                                           | GIGYF2,PENK,PAFAH1B1                              | GLRB,NRXN1,ATXN2                                                            |
| GO:0030100 | 0.02016771  | 9  | 140      | regulation of endocytosis                                                                       | RUFY1,ENSACAG00000006885                          | GAS6,ENSACAG00000015209<br>,ENSACAG00000011799,ATX<br>N2,SDCBP,SCARB1,FLOT1 |
| GO:0006098 | 0.020828916 | 2  | 9        | pentose-phosphate shunt                                                                         | PGM2                                              | H6PD                                                                        |
| GO:0006487 | 0.020843264 | 5  | 56       | protein N-linked glycosylation                                                                  | ALG8                                              | ENSACAG00000016117,VCP,<br>DPAGT1,ST3GAL4                                   |
| GO:0006732 | 0.021849627 | 10 | 181      | coenzyme metabolic process                                                                      | AGK,PGM2                                          | PAH,COQ2,COASY,IDH3G,M<br>AT2B,H6PD,MOCS3,IDH3B                             |
| GO:0090501 | 0.022028298 | 4  | 39       | RNA phosphodiester bond<br>hydrolysis                                                           | EXOSC8                                            | UTP20,ABT1,ELAC2                                                            |
| GO:0009306 | 0.022086372 | 8  | 120      | protein secretion                                                                               | ENSACAG00000011849,LCP2,PAFA<br>H1B1,CPLX1,STEAP3 | PDIA4,FGG,CCKAR                                                             |
| GO:0002504 | 0.023609965 | 4  | 38       | antigen processing and presentation<br>of peptide or polysaccharide<br>antigen via MHC class II | ENSACAG00000006391                                | TRAF6,SPTBN2,AP1G1                                                          |
| GO:0030397 | 0.024392786 | 3  | 20       | membrane disassembly                                                                            | PAFAH1B1                                          | TPR,NUP107                                                                  |
| GO:0051081 | 0.024392786 | 3  | 20       | nuclear envelope disassembly                                                                    | PAFAH1B1                                          | TPR,NUP107                                                                  |
| GO:1901617 | 0.025883019 | 8  | 121      | organic hydroxy compound<br>biosynthetic process                                                | FDPS,IMPA1                                        | PRKAA1,CYP27A1,DPAGT1,<br>TMLHE,PCYT1A,IMPA1,ENS<br>ACAG00000003142         |
| GO:0006446 | 0.026865062 | 5  | 59       | regulation of translational initiation                                                          | EIF4H                                             | RPL13A,EIF5B,ENSACAG000                                                     |

|            |             |    |     |                                                             |                                                |                                                                                            |
|------------|-------------|----|-----|-------------------------------------------------------------|------------------------------------------------|--------------------------------------------------------------------------------------------|
| GO:0006333 | 0.028007139 | 4  | 42  | chromatin assembly or disassembly                           | CENPC,HDAC8                                    | 00010260,TPR<br>CENPH,NOC2L                                                                |
| GO:0006694 | 0.02917831  | 7  | 108 | steroid biosynthetic process                                | ENSACAG00000000510,FDPS                        | PRKAA1,CYP27A1,MAT2B,S<br>CARB1,ENSACAG000000031<br>42                                     |
| GO:0070613 | 0.030824194 | 10 | 185 | regulation of protein processing                            | ENSACAG00000012650,BUB1,ENS<br>ACAG00000026198 | GAS6,CTNND1,ENSACAG000<br>00013691,ENSACAG00000017<br>760,ENSACAG00000011799,S<br>DCBP,TPR |
| GO:0090150 | 0.031925254 | 9  | 167 | establishment of protein<br>localization to membrane        | ENSACAG00000011849                             | GAS6,SYNE3,PKP3,RPS5,EZR<br>,RPL13A,SDCBP,FLOT1                                            |
| GO:0032846 | 0.034964282 | 8  | 130 | positive regulation of homeostatic<br>process               | TRDN,WRAP53                                    | ENSACAG00000009269,GAT<br>A1,CCT4,STX4,PLA2G6,THY<br>1                                     |
| GO:0051591 | 0.034999104 | 5  | 68  | response to cAMP                                            | PER1,PENK                                      | MMP19,CARM1,EZR                                                                            |
| GO:0014075 | 0.035155648 | 3  | 24  | response to amine                                           | HNMT,TRDMT1                                    | ENSACAG00000002091                                                                         |
| GO:2000251 | 0.035824764 | 2  | 11  | positive regulation of actin<br>cytoskeleton reorganization | BAIAP2L1                                       | ENSACAG00000015364                                                                         |
| GO:0034504 | 0.03667234  | 7  | 106 | protein localization to nucleus                             | MCM3AP,RANBP17,TOR1AIP1                        | ENSACAG00000002091,NUP8<br>5,TPR,NUP107                                                    |
| GO:0019318 | 0.03834842  | 7  | 108 | hexose metabolic process                                    | HKDC1,ENSACAG00000003913,PG<br>M2,BRAT1        | PRKAA1,ENSACAG00000003<br>913,H6PD,PGM2L1                                                  |
| GO:0022904 | 0.0388685   | 3  | 41  | respiratory electron transport chain                        | UQCRC2                                         | SDHA,ENSACAG00000007045                                                                    |
| GO:0000380 | 0.039354611 | 2  | 11  | alternative mRNA splicing, via<br>spliceosome               | RSRC1                                          | SFSWAP                                                                                     |
| GO:0001678 | 0.039407858 | 4  | 46  | cellular glucose homeostasis                                | HKDC1                                          | GAS6,SIN3A,MEN1                                                                            |
| GO:0032259 | 0.040573296 | 10 | 186 | methylation                                                 | DDX4,HNMT,MTO1,FTSJ2,TRDMT<br>1                | CARM1,TRMT61B,THUMPD3<br>,MEN1,TGS1                                                        |
| GO:0032479 | 0.040631594 | 5  | 62  | regulation of type I interferon<br>production               | DDX41,NMI                                      | TNFAIP3,DHX9,FLOT1                                                                         |
| GO:0070301 | 0.041529497 | 4  | 47  | cellular response to hydrogen<br>peroxide                   | ECT2,ZNF277                                    | PRKAA1,TNFAIP3                                                                             |
| GO:0031055 | 0.043518123 | 2  | 13  | chromatin remodeling at                                     | CENPC                                          | CENPH                                                                                      |

|            |             |    |     |                                                                                                 |                    |                                                 |
|------------|-------------|----|-----|-------------------------------------------------------------------------------------------------|--------------------|-------------------------------------------------|
| GO:0051289 | 0.043584284 | 4  | 50  | centromere<br>protein homotetramerization                                                       | APOA1BP            | SAMHD1,TK1,ACADL                                |
| GO:0009790 | 0.044090824 | 10 | 185 | embryo development                                                                              | EPN2,CDK5R1        | EPN1,MYH9,ADD1,PDGFC,G<br>ATA1,SIN3A,STIL,MYO1E |
| GO:0048872 | 0.044892596 | 6  | 96  | homeostasis of number of cells                                                                  | GIGYF2             | ADD1,GCNT4,GATA1,TNFAI<br>P3,ATXN2              |
| GO:0000462 | 0.045744754 | 3  | 30  | maturation of SSU-rRNA from<br>tricistronic rRNA transcript (SSU-<br>rRNA, 5.8S rRNA, LSU-rRNA) | DIEXF              | UTP20,DIEXF,WDR3                                |
| GO:0009648 | 0.047631675 | 2  | 13  | photoperiodism                                                                                  | PER1               | FBXL3                                           |
| GO:2000257 | 0.048914315 | 3  | 28  | regulation of protein activation<br>cascade                                                     | ENSACAG00000026198 | SERPINC1,ENSACAG0000001<br>7760                 |
| GO:0006265 | 0.049369877 | 2  | 12  | DNA topological change                                                                          | TOP3A              | MTX1                                            |

**Table S28. Categories showed evolutionary convergence between the frogs and lizards at elevation around 3500 m.**

| category   | pvalue      | numDE<br>InCat | numIn<br>Cat | term                                                                                                                   | Frog PSGs                   | Lizard PSGs                                                  |
|------------|-------------|----------------|--------------|------------------------------------------------------------------------------------------------------------------------|-----------------------------|--------------------------------------------------------------|
| GO:1990440 | 0.000384738 | 3              | 9            | positive regulation of transcription from<br>RNA polymerase II promoter in response to<br>endoplasmic reticulum stress | ATF6                        | ATF4,ATF6B                                                   |
| GO:0010939 | 0.001485361 | 3              | 15           | regulation of necrotic cell death                                                                                      | FADD                        | RIPK1,PPIF                                                   |
| GO:0016485 | 0.001657693 | 10             | 182          | protein processing                                                                                                     | FADD,ENSACAG000000050<br>27 | BCL2L13,ATP6AP2,ADAMTS<br>3,LGMN,HM13,AFG3L2,AEB<br>P1,LONP2 |
| GO:0005981 | 0.002249768 | 2              | 5            | regulation of glycogen catabolic process                                                                               | PPP1R3B                     | ENSACAG00000024726                                           |
| GO:0039531 | 0.002341062 | 3              | 13           | regulation of viral-induced cytoplasmic<br>pattern recognition receptor signaling<br>pathway                           | ENSACAG00000029208          | TKFC,NLRX1                                                   |
| GO:0045651 | 0.002572418 | 2              | 5            | positive regulation of macrophage<br>differentiation                                                                   | FADD                        | RIPK1                                                        |
| GO:0036500 | 0.002974759 | 2              | 4            | ATF6-mediated unfolded protein response                                                                                | ATF6                        | ATF6B                                                        |

|            |             |   |     |                                                                                                                         |                                              |                                    |
|------------|-------------|---|-----|-------------------------------------------------------------------------------------------------------------------------|----------------------------------------------|------------------------------------|
| GO:0090521 | 0.003281777 | 2 | 4   | glomerular visceral epithelial cell migration                                                                           | ANLN                                         | NUP93                              |
| GO:1901888 | 0.006540381 | 5 | 61  | regulation of cell junction assembly                                                                                    | ENSACAG00000005027,RAC1                      | COL16A1,ENSACAG00000015364,RAPGEF1 |
| GO:1901522 | 0.007189188 | 3 | 19  | positive regulation of transcription from RNA polymerase II promoter involved in cellular response to chemical stimulus | ATF6                                         | ATF4,RXRA                          |
| GO:0051170 | 0.008349257 | 6 | 87  | nuclear import                                                                                                          | CSE1L,TGS1                                   | IPO9,HTATIP2,TNPO3,NUP93           |
| GO:0021799 | 0.008614656 | 2 | 9   | cerebral cortex radially oriented cell migration                                                                        | RAC1                                         | RTN4                               |
| GO:2001240 | 0.010663203 | 3 | 24  | negative regulation of extrinsic apoptotic signaling pathway in absence of ligand                                       | FYN                                          | RIPK1,ZC3HC1                       |
| GO:0043624 | 0.010869853 | 4 | 49  | cellular protein complex disassembly                                                                                    | MRPL44,ENSACAG00000010017,ENSACAG00000008908 | VILL                               |
| GO:0031468 | 0.013939645 | 2 | 11  | nuclear envelope reassembly                                                                                             | CHMP7                                        | CHMP2A                             |
| GO:0008360 | 0.013974349 | 7 | 130 | regulation of cell shape                                                                                                | ENSACAG00000005027,FYN                       | PTN,TTBK2,EZR,HPN,VILL             |
| GO:0010458 | 0.015971503 | 2 | 10  | exit from mitosis                                                                                                       | CHMP7                                        | CHMP2A                             |
| GO:0017038 | 0.016640492 | 6 | 108 | protein import                                                                                                          | CSE1L                                        | IPO9,AFG3L2,TNPO3,NUP93,LONP2      |
| GO:0034976 | 0.019758571 | 6 | 112 | response to endoplasmic reticulum stress                                                                                | AARS,ATF6                                    | ATF4,SEL1L,ATF6B,UBE4B             |
| GO:0090103 | 0.020127148 | 2 | 13  | cochlea morphogenesis                                                                                                   | RAC1                                         | HPN                                |
| GO:0097190 | 0.0214731   | 8 | 190 | apoptotic signaling pathway                                                                                             | FADD,ZNF346,ZNF622                           | FAS,ATF4,PARP2,UBE4B,RIPK1         |
| GO:0032239 | 0.022664747 | 2 | 11  | regulation of nucleobase-containing compound transport                                                                  | IWS1                                         | RIPK1                              |
| GO:0009451 | 0.02457272  | 6 | 122 | RNA modification                                                                                                        | PUS7,AARS,TGS1                               | HEMK1,TXNDC9,TRIT1                 |
| GO:0006044 | 0.024673619 | 2 | 14  | N-acetylglucosamine metabolic process                                                                                   | ENSACAG00000001708                           | CHST2                              |
| GO:0006457 | 0.026225839 | 7 | 168 | protein folding                                                                                                         | AARS,ATF6                                    | FKBP9,TBCD,CRTAP,PPIF,FKBP15       |
| GO:0043467 | 0.029021199 | 4 | 65  | regulation of generation of precursor metabolites and energy                                                            | PPP1R3B                                      | SIRT6,PPIF,ENSACAG00000024726      |
| GO:0043547 | 0.029612275 | 5 | 91  | positive regulation of GTPase activity                                                                                  | CDKL5,RAC1                                   | TBCD,ENSACAG00000015364,RAPGEF1    |

|            |             |   |     |                                                              |                    |                                      |
|------------|-------------|---|-----|--------------------------------------------------------------|--------------------|--------------------------------------|
| GO:0006887 | 0.03291211  | 7 | 159 | exocytosis                                                   | SCRN1,MIA3         | STXBP3,LIN7A,SYTL2,STXB<br>P2,PPP3CB |
| GO:0001895 | 0.033774468 | 2 | 16  | retina homeostasis                                           | BBS10              | WDR36                                |
| GO:0043588 | 0.036278776 | 3 | 33  | skin development                                             | RYR3,AARS          | COL3A1                               |
| GO:0036120 | 0.040566244 | 2 | 16  | cellular response to platelet-derived growth factor stimulus | FYN                | PTN                                  |
| GO:0006040 | 0.044014955 | 3 | 44  | amino sugar metabolic process                                | ENSACAG00000001708 | CHST2,MGAT1                          |
| GO:0043029 | 0.04433137  | 2 | 20  | T cell homeostasis                                           | FADD               | PPP3CB                               |
| GO:0006400 | 0.044821016 | 4 | 74  | tRNA modification                                            | AARS               | HEMK1,TXNDC9,TRIT1                   |
| GO:0036119 | 0.046455853 | 2 | 17  | response to platelet-derived growth factor                   | FYN                | PTN                                  |

**Table S29. Categories showed evolutionary convergence between the frogs and lizards at elevation around 4500 m**

| category   | pvalue      | numDE<br>InCat | numIn<br>Cat | term                                                      | Frog PSGs                  | Lizard PSGs                                                                     |
|------------|-------------|----------------|--------------|-----------------------------------------------------------|----------------------------|---------------------------------------------------------------------------------|
| GO:0010954 | 6.88E-05    | 4              | 15           | positive regulation of protein processing                 | PLGRKT,MFI2                | CLEC3B,CTNND1                                                                   |
| GO:1900024 | 0.000117483 | 6              | 41           | regulation of substrate adhesion-dependent cell spreading | MFI2,RAC1                  | OLFM4,POSTN,FLNA,DM<br>TN                                                       |
| GO:0022618 | 0.000649805 | 11             | 199          | ribonucleoprotein complex assembly                        | NSUN4,ENSACAG00000023921   | CIRBP,RPL11,PSIP1,DDX2<br>3,DDX6,SART1,ENSACAG<br>00000004183,NUFIP1,ATX<br>N2L |
| GO:0051932 | 0.0019179   | 2              | 4            | synaptic transmission, GABAergic                          | RAC1                       | DNM1                                                                            |
| GO:0006826 | 0.002232932 | 4              | 33           | iron ion transport                                        | MFI2,SLC40A1               | PVRL1,ENSACAG0000000<br>4685                                                    |
| GO:0006109 | 0.002529437 | 8              | 137          | regulation of carbohydrate metabolic process              | ENSACAG00000022125,C4orf27 | ENSACAG00000002886,AP<br>2A1,PPP4R3A,ADIPOR1,G<br>PER1,PLCD1                    |
| GO:1904948 | 0.005086229 | 2              | 6            | midbrain dopaminergic neuron differentiation              | RAC1                       | RYK                                                                             |
| GO:0060644 | 0.005695273 | 2              | 8            | mammary gland epithelial cell differentiation             | IRF6                       | ENSACAG00000002886                                                              |

|            |             |   |     |                                                       |                            |                                               |
|------------|-------------|---|-----|-------------------------------------------------------|----------------------------|-----------------------------------------------|
| GO:0010675 | 0.006029237 | 7 | 128 | regulation of cellular carbohydrate metabolic process | ENSACAG00000022125,C4orf27 | ENSACAG00000002886,PP4R3A,ADIPOR1,GPER1,PLCD1 |
| GO:0006953 | 0.006084761 | 3 | 22  | acute-phase response                                  | ENSACAG00000022125         | FN1,ITIH4                                     |
| GO:0090329 | 0.009921794 | 4 | 41  | regulation of DNA-dependent DNA replication           | ZRANB3,DSCC1,NBN           | SMC1A                                         |
| GO:0000041 | 0.011086842 | 5 | 77  | transition metal ion transport                        | MFI2,SLC40A1               | ATP2C1,PVRL1,ENSACAG00000004685               |
| GO:0022613 | 0.012969547 | 4 | 54  | ribonucleoprotein complex biogenesis                  | ENSACAG00000009242         | GNL3,LSG1,RPLP0                               |
| GO:0009451 | 0.01588654  | 6 | 122 | RNA modification                                      | NSUN4,MTO1                 | NOP58,TYW5,METTL3,NOP56                       |
| GO:0006473 | 0.016478222 | 6 | 102 | protein acetylation                                   | ATAT1,DSCC1,EPC2           | BRPF1,TAF10,BRD1                              |
| GO:0045727 | 0.017256202 | 4 | 58  | positive regulation of translation                    | NSUN4                      | CIRBP,ABCF1,METTL3                            |
| GO:0009108 | 0.018600805 | 5 | 98  | coenzyme biosynthetic process                         | COQ3                       | PCBD2,NADK2,ELOVL5,THEM5                      |
| GO:0001956 | 0.018716143 | 2 | 12  | positive regulation of neurotransmitter secretion     | STX1B                      | GPER1                                         |
| GO:0007062 | 0.019688526 | 5 | 76  | sister chromatid cohesion                             | SMC5,DSCC1                 | STAG1,CKAP5,SMC1A                             |
| GO:0051262 | 0.020216924 | 5 | 87  | protein tetramerization                               | TRPM3                      | ALDOA,FARSA,GLS,DNM1                          |
| GO:0016072 | 0.021575442 | 7 | 168 | rRNA metabolic process                                | NSUN4,WDR36                | UTP6,NOP58,DIS3,SART1,NOP56                   |
| GO:0006636 | 0.022019106 | 3 | 37  | unsaturated fatty acid biosynthetic process           | ENSACAG00000017657         | PTGES3,ELOVL5                                 |
| GO:0002690 | 0.023738402 | 3 | 41  | positive regulation of leukocyte chemotaxis           | RAC1                       | F7,ADAM17                                     |
| GO:0042770 | 0.025243823 | 4 | 60  | signal transduction in response to DNA damage         | GTSE1,NBN                  | HIPK2,SMC1A                                   |
| GO:0060249 | 0.026047808 | 7 | 154 | anatomical structure homeostasis                      | SMC5,RAC1,PFKM,NBN,WDR36   | RPA1,LPCAT1                                   |
| GO:0005996 | 0.029535623 | 6 | 131 | monosaccharide metabolic process                      | ENSACAG00000022125,PFKM    | ENSACAG00000002886,RGN,MAN2C1,SLC37A4         |
| GO:0045833 | 0.033235711 | 3 | 39  | negative regulation of lipid metabolic process        | ENSACAG00000022125         | GPER1,LPCAT1                                  |
| GO:0046427 | 0.034274719 | 2 | 17  | positive regulation of JAK-STAT cascade               | AGAP2                      | ADIPOR1                                       |

|            |             |   |     |                                                    |                    |                                         |
|------------|-------------|---|-----|----------------------------------------------------|--------------------|-----------------------------------------|
| GO:0008344 | 0.038697933 | 4 | 67  | adult locomotory behavior                          | SNCG               | HIPK2,EPHA4,DNM1                        |
| GO:0031954 | 0.038958704 | 2 | 18  | positive regulation of protein autophosphorylation | NBN                | CTNND1                                  |
| GO:0043543 | 0.04034647  | 6 | 132 | protein acylation                                  | ATAT1,DSCC1,EPC2   | BRPF1,TAF10,BRD1                        |
| GO:0007030 | 0.042136667 | 5 | 96  | Golgi organization                                 | KIFC3              | RAB43,TJAP1,COG4,ENSA<br>CAG00000013675 |
| GO:0032355 | 0.043205949 | 4 | 77  | response to estradiol                              | ENSACAG00000022125 | F7,POSTN,GPER1                          |
| GO:0045216 | 0.044599456 | 6 | 128 | cell-cell junction organization                    | RAC1,KIFC3         | FLNA,GNPAT,PVRL1,DLG<br>5               |
| GO:0002063 | 0.04937034  | 2 | 18  | chondrocyte development                            | CHST13             | BMPR2                                   |

**Table S30. Categories showed evolutionary convergence between the frogs and lizards along branches 7, 6, and 1.**

| category   | pvalue      | numDE<br>InCat | numIn<br>Cat | term                                                  | Frog PSGs                                                            | Lizard PSGs                                                                                                                                          |
|------------|-------------|----------------|--------------|-------------------------------------------------------|----------------------------------------------------------------------|------------------------------------------------------------------------------------------------------------------------------------------------------|
| GO:0006412 | 1.91E-05    | 20             | 228          | translation                                           | RRBP1,MRPL35,MRPS30,ENSAC<br>AG00000008192,RPLP2,MRPL18,S<br>LC25A35 | MRPL47,SLC25A3,RPS8,EIF4H,EEF<br>2,ENSACAG00000009700,ENSACA<br>G00000010703,SLC25A26,RPS5,RPL<br>15,RPLP1,ENSACAG00000004183,E<br>NSACAG00000007152 |
| GO:0001938 | 0.0001616   | 8              | 44           | positive regulation of endothelial cell proliferation | NRP2,SEMA5A,PDCD6,TGFBR1                                             | F3,FIGF,VEGFC,VEGFA                                                                                                                                  |
| GO:0007062 | 0.000267449 | 11             | 76           | sister chromatid cohesion                             | DSN1,CENPC,ENSACAG00000011<br>405,PAFAH1B1,HDAC8,NUP107              | STAG2,STAG1,PDS5B,CLIP1,PLK1                                                                                                                         |
| GO:0032355 | 0.000587452 | 10             | 77           | response to estradiol                                 | ENSACAG00000022125,PENK,EN<br>SACAG00000017475,TXNIP                 | F7,SLC6A1,MAPK15,PTGFR,GPER1<br>,ENSACAG00000028324                                                                                                  |
| GO:0070507 | 0.000631703 | 13             | 119          | regulation of microtubule cytoskeleton organization   | FBXW5,CENPJ,CDK5R1,PAFAH1<br>B1,ENSACAG00000012696,RNF4,<br>RANBP1   | ROCK2,CDK5R1,XPO1,PDCD6IP,V<br>PS4B,CLIP1,PLK1                                                                                                       |
| GO:0051660 | 0.000692194 | 3              | 5            | establishment of centrosome localization              | PAFAH1B1                                                             | CEP83,EZR                                                                                                                                            |
| GO:0007596 | 0.000965588 | 11             | 91           | blood coagulation                                     | PROCR,PROS1                                                          | F3,F7,VWF,F5,FGG,WAS,ENSACA<br>G00000003225,ADORA2A,LMAN1                                                                                            |

|            |             |    |     |                                                                 |                                                                                                   |                                                                                                                                       |
|------------|-------------|----|-----|-----------------------------------------------------------------|---------------------------------------------------------------------------------------------------|---------------------------------------------------------------------------------------------------------------------------------------|
| GO:0050817 | 0.000965588 | 11 | 91  | coagulation                                                     | PROCR,PROS1                                                                                       | F3,F7,VWF,F5,FGG,WAS,ENSACA<br>G00000003225,ADORA2A,LMAN1                                                                             |
| GO:1900024 | 0.001003693 | 7  | 41  | regulation of substrate<br>adhesion-dependent cell<br>spreading | OLFM4,MFI2,RAC1                                                                                   | OLFM4,FGG,DMTN,NET1,SDC3                                                                                                              |
| GO:0030100 | 0.001034105 | 14 | 140 | regulation of endocytosis                                       | ENSACAG00000013638,RUFY1,A<br>NKFY1,ENSACAG00000006885                                            | PPT1,ARFGAP1,ENSACAG0000001<br>5209,EHD4,RUFY1,ENSACAG00000<br>012647,ENSACAG00000006690,OPH<br>N1,SDCBP,ENSACAG00000028324,<br>FLOT1 |
| GO:0051186 | 0.00140481  | 18 | 226 | cofactor metabolic process                                      | ENSACAG00000022125,GNMT,CO<br>Q3,COQ5,ALAD,GPHN,ENSACAG<br>00000008138,ENSACAG000000043<br>07     | PPT1,ACOT8,ASPDH,PCBD2,ALDO<br>B,ELOVL5,THEM5,ELOVL2,ENSA<br>CAG00000007025,IDH3B,ENSACA<br>G00000004307                              |
| GO:0010954 | 0.00150727  | 4  | 15  | positive regulation of protein<br>processing                    | PLGRKT,MFI2                                                                                       | CLEC3B,CTNND1                                                                                                                         |
| GO:0044743 | 0.001540808 | 5  | 27  | intracellular protein<br>transmembrane import                   | PEX26,ENSACAG00000011849,HS<br>PA4,LONP2                                                          | ENSACAG00000028324                                                                                                                    |
| GO:0070925 | 0.001774729 | 20 | 246 | organelle assembly                                              | CENPC,CENPJ,HAUS7,ARHGEF1<br>0,SPATA6,TSR1,PAFAH1B1,ENSA<br>CAG00000012696,ENSACAG00000<br>013026 | CIRBP,PLS1,ATG13,ZMYND10,EZR<br>,DDX6,ENSACAG00000004832,PDC<br>D6IP,VPS4B,KIAA0196,ENSACAG0<br>0000013026,CHD4                       |
| GO:0072313 | 0.002121981 | 2  | 2   | metanephric glomerular<br>epithelial cell development           | NPHS2                                                                                             | LAMB2                                                                                                                                 |
| GO:0035336 | 0.002456979 | 5  | 26  | long-chain fatty-acyl-CoA<br>metabolic process                  | ENSACAG00000004307                                                                                | ACOT8,ELOVL5,THEM5,ELOVL2,E<br>NSACAG00000004307                                                                                      |
| GO:0002181 | 0.002523838 | 4  | 21  | cytoplasmic translation                                         | RPLP2                                                                                             | EIF4H,RPL15,RPL1                                                                                                                      |
| GO:0006096 | 0.002883309 | 6  | 37  | glycolytic process                                              | HKDC1,ENSACAG00000002126                                                                          | ALDOA,ALDOB,PKM,PFKFB3                                                                                                                |
| GO:0043627 | 0.004525206 | 11 | 115 | response to estrogen                                            | ENSACAG00000022125,PENK,EN<br>SACAG00000017475,TXNIP                                              | ALDOA,F7,SLC6A1,MAPK15,PTGF<br>R,GPER1,ENSACAG00000028324                                                                             |
| GO:0071806 | 0.004628732 | 5  | 34  | protein transmembrane<br>transport                              | PEX26,ENSACAG00000011849,HS<br>PA4,LONP2                                                          | ENSACAG00000028324                                                                                                                    |
| GO:0006091 | 0.005097942 | 14 | 179 | generation of precursor                                         | ENSACAG00000005218,HKDC1,G                                                                        | ALDOA,NDUFS4,ALDOB,ADGRF5,                                                                                                            |



|            |             |    |     |                                                                        |                                                                 |                                                                                        |
|------------|-------------|----|-----|------------------------------------------------------------------------|-----------------------------------------------------------------|----------------------------------------------------------------------------------------|
|            |             |    |     | metabolites and energy                                                 | AA,OXA1L,ENSACAG00000002126                                     | ENSACAG00000007045,COX19,MTFR1,PKM,PFKFB3                                              |
| GO:0021819 | 0.00518773  | 3  | 10  | layer formation in cerebral cortex                                     | CDK5R1,PAFAH1B1                                                 | SOCS7,CDK5R1                                                                           |
| GO:0045765 | 0.005674056 | 14 | 172 | regulation of angiogenesis                                             | SEMA5A,PDCD6,TERT                                               | HIPK2,F3,FIGF,VEGFC,ANXA3,ITGB2,HTATIP2,COL4A2,STAB1,THBS2,EMP2                        |
| GO:0044772 | 0.005834022 | 13 | 148 | mitotic cell cycle phase transition                                    | OFD1,CAMK2D,HAUS7,ORC2,PAFAH1B1,ENSACAG00000013026,RANBP1       | CDK14,ENSACAG00000025027,CAMK2D,TAF10,ENSACAG00000013026,EIF4E,ENSACAG00000028324,PLK1 |
| GO:0035337 | 0.00630288  | 5  | 32  | fatty-acyl-CoA metabolic process                                       | ENSACAG00000004307                                              | ACOT8,ELOVL5,THEM5,ELOVL2,ENSACAG00000004307                                           |
| GO:0045056 | 0.006944866 | 3  | 11  | transcytosis                                                           | MYO1A                                                           | MFSD2A,VPS35                                                                           |
| GO:0051932 | 0.007409718 | 2  | 4   | synaptic transmission, GABAergic                                       | RAC1                                                            | DNM1                                                                                   |
| GO:0006414 | 0.007522494 | 6  | 58  | translational elongation                                               | MRPS30,RPLP2,MRPS31                                             | ENSACAG00000009700,RPLP1,ENSACAG00000007152                                            |
| GO:0090003 | 0.008215618 | 6  | 48  | regulation of establishment of protein localization to plasma membrane | PPP2R5A                                                         | PLS1,EZR,ARF6,GPER1,ITGB1                                                              |
| GO:0017038 | 0.008249771 | 10 | 108 | protein import                                                         | PEX26,ENSACAG00000011849,HS PA4,KPNA5,TXNIP,LONP2,NUP107,RANBP1 | NOP58,ENSACAG00000028324                                                               |
| GO:0016052 | 0.00992898  | 9  | 93  | carbohydrate catabolic process                                         | GK5,HKDC1,GAA,ENSACAG00000002126                                | ALDOA,ENSACAG00000001468,ALDOB,PKM,PFKFB3                                              |
| GO:0021549 | 0.010184445 | 5  | 35  | cerebellum development                                                 | CDK5R1,SEMA4C                                                   | CNTN1,CDK5R1,RPGRIP1L,ENSACAG00000028324                                               |
| GO:0043161 | 1.02E-02    | 16 | 223 | proteasome-mediated ubiquitin-dependent protein catabolic process      | FBXW5,GTSE1,ENSACAG00000008899,KEAP1,RNF4                       | HSP90B1,CDC20,FBXO4,C18orf25,SPOPL,UBE2J1,EDEM1,PSMD12,UBE4B,NSFL1C,PLK1               |
| GO:0034605 | 0.010822911 | 5  | 37  | cellular response to heat                                              | PDCD6,ENSACAG00000011939                                        | ENSACAG00000015832,ENSACAG0000028324,MYOF                                              |

|            |             |    |     |                                                                                                     |                                            |                                                                                                           |
|------------|-------------|----|-----|-----------------------------------------------------------------------------------------------------|--------------------------------------------|-----------------------------------------------------------------------------------------------------------|
| GO:0061635 | 0.011179153 | 2  | 5   | regulation of protein complex stability                                                             | SQSTM1                                     | ENSACAG00000028324                                                                                        |
| GO:0051560 | 0.011254107 | 3  | 13  | mitochondrial calcium ion homeostasis                                                               | MICU1                                      | IMMT,CCDC109B                                                                                             |
| GO:1903532 | 0.01255461  | 17 | 251 | positive regulation of secretion by cell                                                            | ENSACAG00000011849,PPIA,ENSACAG00000029563 | VEGFC,FGG,LPL,ATP6AP1,EZR,ENSACAG00000006690,PDCD6IP,VPS4B,PLA2G6,GPER1,SDCBP,IL1RAP,PLCD1,VPS35          |
| GO:0010762 | 0.012585045 | 4  | 25  | regulation of fibroblast migration                                                                  | CYGB,WDPCCP,RAC1                           | DMTN                                                                                                      |
| GO:0043928 | 0.012603396 | 3  | 14  | exonucleolytic nuclear-transcribed mRNA catabolic process involved in deadenylation-dependent decay | EXOSC8                                     | EXOSC2,CNOT8                                                                                              |
| GO:0030866 | 0.013377646 | 4  | 24  | cortical actin cytoskeleton organization                                                            | EPB41L1                                    | PLS1,EZR,ARF6                                                                                             |
| GO:0048520 | 0.013978057 | 8  | 88  | positive regulation of behavior                                                                     | SEMA5A,RAC1,PENK                           | F7,FIGF,VEGFC,STX3,ADAM17                                                                                 |
| GO:0006913 | 0.014240764 | 14 | 185 | nucleocytoplasmic transport                                                                         | RSRC1,KPNA5,TXNIP,NUP107,RANBP1            | NOP58,HTATIP2,ENSACAG00000013788,ENSACAG00000026588,XPO1,ENSACAG00000015804,THOC1,ENSACAG00000028324,TGS1 |
| GO:0051651 | 0.014638942 | 10 | 112 | maintenance of location in cell                                                                     | DSN1,TBCCD1,DZIP1,ARL2BP,KEAPI,GAA         | SUPT7L,EZR,VPS13C,CEP350                                                                                  |
| GO:0051169 | 0.016167646 | 14 | 188 | nuclear transport                                                                                   | RSRC1,KPNA5,TXNIP,NUP107,RANBP1            | NOP58,HTATIP2,ENSACAG00000013788,ENSACAG00000026588,XPO1,ENSACAG00000015804,THOC1,ENSACAG00000028324,TGS1 |
| GO:0032530 | 0.018682016 | 3  | 14  | regulation of microvillus organization                                                              | ENSACAG00000006885                         | PLS1,EZR                                                                                                  |
| GO:1902285 | 0.019974542 | 3  | 12  | semaphorin-plexin signaling pathway involved in neuron projection guidance                          | NRP2,PLXNA1                                | PLXNB2                                                                                                    |

|            |             |    |     |                                                                                   |                                                                                                       |                                                           |
|------------|-------------|----|-----|-----------------------------------------------------------------------------------|-------------------------------------------------------------------------------------------------------|-----------------------------------------------------------|
| GO:0000291 | 0.023745737 | 3  | 18  | nuclear-transcribed mRNA<br>catabolic process,<br>exonucleolytic                  | EXOSC8                                                                                                | EXOSC2,CNOT8                                              |
| GO:0043547 | 0.024198176 | 8  | 91  | positive regulation of GTPase<br>activity                                         | ARHGAP27,RAC1,ENSACAG0000<br>0006885                                                                  | SEMA4D,SNX9,TNFRSF14,RAPGEF<br>1,NET1                     |
| GO:0070482 | 0.024360832 | 13 | 190 | response to oxygen levels                                                         | CAMK2D,CYGB,PENK,NARFL,TE<br>RT                                                                       | ALDOA,HIPK2,HSP90B1,F7,FIGF,V<br>EGFC,CAMK2D,ADAM17,PLCD1 |
| GO:0006413 | 0.02576018  | 7  | 86  | translational initiation                                                          | MRPS30,MRPS31                                                                                         | EIF4H,RPS5,EIF4E2,EIF4E,EIF3G                             |
| GO:1903010 | 0.0259739   | 3  | 19  | regulation of bone<br>development                                                 | TMEM119                                                                                               | ATP6AP1,FAM101B,TMEM119                                   |
| GO:0051276 | 0.027180126 | 18 | 271 | chromosome organization                                                           | DSN1,CENPC,TOP3A,DCLRE1B,E<br>NSACAG00000011405,ENSACAG0<br>0000012053,PAFAH1B1,HDAC8,N<br>UP107,TERT | STAG2,STAG1,HMGB2,PDS5B,FBX<br>O4,CLIP1,GPER1,PLK1        |
| GO:0072594 | 0.029213859 | 15 | 235 | establishment of protein<br>localization to organelle                             | PEX26,ENSACAG00000011849,NA<br>BP2,HSPA4,KPNA5,TXNIP,LONP2<br>,NUP107,RANBP1,TERT                     | NOP58,RPS5,VPS13C,ENSACAG000<br>00028324,SPCS2            |
| GO:0001666 | 0.030533707 | 12 | 177 | response to hypoxia                                                               | CAMK2D,CYGB,PENK,NARFL,TE<br>RT                                                                       | ALDOA,HIPK2,HSP90B1,F7,FIGF,V<br>EGFC,CAMK2D,ADAM17       |
| GO:0034427 | 0.031752012 | 2  | 9   | nuclear-transcribed mRNA<br>catabolic process,<br>exonucleolytic, 3'-5'           | EXOSC8                                                                                                | EXOSC2                                                    |
| GO:0045358 | 0.033217193 | 1  | 1   | negative regulation of<br>interferon-beta biosynthetic<br>process                 | NMI                                                                                                   | NMI                                                       |
| GO:0030947 | 0.033285875 | 3  | 19  | regulation of vascular<br>endothelial growth factor<br>receptor signaling pathway | PDCD6                                                                                                 | VEGFC,MYOF                                                |
| GO:0043633 | 0.033807095 | 2  | 9   | polyadenylation-dependent<br>RNA catabolic process                                | EXOSC8                                                                                                | EXOSC2                                                    |
| GO:0010566 | 0.033963987 | 2  | 8   | regulation of ketone<br>biosynthetic process                                      | COQ3                                                                                                  | SIRT5                                                     |
| GO:1901888 | 0.034360891 | 6  | 61  | regulation of cell junction<br>assembly                                           | WDPCP,RAC1                                                                                            | VEGFA,DMTN,RAPGEF1,FLOT1                                  |

|            |             |    |     |                                                               |                                                             |                                                                           |
|------------|-------------|----|-----|---------------------------------------------------------------|-------------------------------------------------------------|---------------------------------------------------------------------------|
| GO:2000352 | 0.035373391 | 3  | 18  | negative regulation of endothelial cell apoptotic process     | SEMA5A,TERT                                                 | FGG                                                                       |
| GO:0050795 | 0.0375796   | 12 | 174 | regulation of behavior                                        | SEMA5A,PLXNA1,RAC1,PENK,SEMA4C                              | F7,FIGF,VEGFC,SEMA4D,STX3,ADAM17,PADI2                                    |
| GO:0046364 | 0.040185896 | 4  | 35  | monosaccharide biosynthetic process                           | ENSACAG00000002126                                          | RGN,ALDOB,ENSACAG00000010703                                              |
| GO:0030048 | 0.041704426 | 5  | 44  | actin filament-based movement                                 | CAMK2D,MYO1A                                                | MYH9,CAMK2D,WAS,EMP2                                                      |
| GO:0045926 | 0.043132454 | 12 | 183 | negative regulation of growth                                 | SEMA5A,SQSTM1,CDK5R1,SEMA4C                                 | PPT1,IFRD1,SEMA4D,SMARCA2,LGMN,CDK5R1,MUL1,ADIPOR1,FOXK1                  |
| GO:0045787 | 0.044578274 | 15 | 242 | positive regulation of cell cycle                             | ENSACAG00000014321,GTSE1,CDK5R1,PAFAH1B1,RANBP1,KIF20B,TERT | RAB11FIP4,ROCK2,ADAM17,UBE2E2,CDK5R1,ENSACAG00000004832,VPS4B,EIF4E,CNOT8 |
| GO:0045022 | 0.045732361 | 3  | 20  | early endosome to late endosome transport                     | ENSACAG00000012345                                          | VPS4B,EMP2                                                                |
| GO:0010664 | 0.046824507 | 2  | 9   | negative regulation of striated muscle cell apoptotic process | BAG3                                                        | ENSACAG00000028324                                                        |
| GO:0015931 | 0.047860364 | 10 | 141 | nucleobase-containing compound transport                      | MRPL18,NUP107,RANBP1,THOC2                                  | SLC35A1,SLC25A26,XPO1,ENSACAG00000015804,THOC1,FLOT1                      |

**Table S31. Convergent evolved KEGG pathways between frogs and lizards.**

| KEGG pathway                                                | Frog                                                           | Lizard            |
|-------------------------------------------------------------|----------------------------------------------------------------|-------------------|
| ko00010:Glycolysis / Gluconeogenesis                        | ALDOA, HK2                                                     | PGM2, HKDC1, PFKM |
| ko00030:Pentose phosphate pathway                           | ALDOA, G6PD, H6PD, TKT                                         | PGM2, PFKM, PRPS2 |
| ko00051:Fructose and mannose metabolism                     | ALDOA, GMDS, HK2                                               | HKDC1, PFKM       |
| ko00052:Galactose metabolism                                | HK2                                                            | PGM2, HKDC1, PFKM |
| ko00130:Ubiquinone and other terpenoid-quinone biosynthesis | COQ2                                                           | GGCX, COQ3        |
| ko00140:Steroid hormone biosynthesis                        | STS                                                            | SRD5A3            |
| ko00190:Oxidative phosphorylation                           | SDHA, NDUFA6, ATP6AP1, NDUFB9, COX4I1, ATP6V1H, ATP6V0A1, LHPP | LHPP              |

|                                                     |                                                                          |                                   |
|-----------------------------------------------------|--------------------------------------------------------------------------|-----------------------------------|
| ko00230:Purine metabolism                           | ADCY4, POLD2, NTPCR, PDE3B, RRM2B, IMPDH1                                | PGM2, ADK, POLR3A, GUCY1B3, PRPS2 |
| ko00240:Pyrimidine metabolism                       | POLD2, TXNRD3, RRM2B, DCTPP1, TK1                                        | POLR3A                            |
| ko00340:Histidine metabolism                        | CARNS1                                                                   | HNMT                              |
| ko00500:Starch and sucrose metabolism               | HK2, PGM2L1                                                              | PGM2, HKDC1                       |
| ko00510:N-Glycan biosynthesis                       | MGAT1, ALG3, DPAGT1, RPN2                                                | RPN2, ALG8                        |
| ko00520:Amino sugar and nucleotide sugar metabolism | GMD5, HK2                                                                | PGM2, HKDC1                       |
| ko00524:Butirosin and neomycin biosynthesis         | HK2                                                                      | HKDC1                             |
| ko00532:Glycosaminoglycan biosynthesis              | B4GALT7                                                                  | CHST13                            |
| ko00561:Glycerolipid metabolism                     | TKFC, LIPC, AGK                                                          | LCLAT1, AGK                       |
| ko00562:Inositol phosphate metabolism               | IMPA1, PLCD1, OCRL                                                       | IMPA1                             |
| ko00564:Glycerophospholipid metabolism              | ETNPPL, CHKA, PGS1, LPCAT1, ETNK1, PLA2G6, GNPAT, PCYT1A, LPCAT3, LPCAT4 | PGS1, LCLAT1                      |
| ko00565:Ether lipid metabolism                      | LPCAT1, PLA2G6, LPCAT4                                                   | PAFAH1B1                          |
| ko00590:Arachidonic acid metabolism                 | PTGES3, PLA2G6                                                           | LTA4H                             |
| ko00900:Terpenoid backbone biosynthesis             | HMGCR, GGPS1                                                             | FDPS                              |
| ko00910:Nitrogen metabolism                         | CA12                                                                     | CA4                               |
| ko00970:Aminoacyl-tRNA biosynthesis                 | YARS, RARS, FARSA                                                        | DARS, AARS, QARS, MTFMT           |
| ko01130:Biosynthesis of antibiotics                 | ALDOA, SDHA, G6PD, IDH3G, HMGCR, GGPS1, HK2, IDH3B, TKT                  | PGM2, HKDC1, FDPS, PFKM, PRPS2    |
| ko01200:Carbon metabolism                           | ALDOA, SDHA, G6PD, IDH3G, TKFC, H6PD, HK2, IDH3B, TKT                    | HKDC1, PFKM, PRPS2                |
| ko01230:Biosynthesis of amino acids                 | ALDOA, IDH3G, IDH3B, TKT, PAH, MAT2B                                     | PFKM, PRPS2                       |
| ko03008:Ribosome biogenesis in eukaryotes           | WDR36, UTP6, LSG1, WDR3, NOP58, NOP56, MDN1, GNL3                        | WDR36, UTP15, MPHOSPH10           |
| ko03010:Ribosome                                    | MRPL28, MRPS18A, RPL13A, RPLP0, RPL15, RPLP1, RPL35, RPL11, RPS5, MRPL20 | MRPL18                            |

|                                                |                                                                                                          |                                  |
|------------------------------------------------|----------------------------------------------------------------------------------------------------------|----------------------------------|
| ko03013:RNA transport                          | EEF1A1, EIF4G3, ELAC2, EIF3H,<br>PAIP1, EIF5B, NUP93, NUP85,<br>NUP107, THOC5, TGS1, TPR, EIF2B3,<br>PNN | TGS1                             |
| ko03015:mRNA surveillance pathway              | PNN                                                                                                      | PPP2R2A                          |
| ko03018:RNA degradation                        | DIS3, SKIV2L, TTC37, EDC4, DDX6                                                                          | EXOSC8, DCP1B, PFKM              |
| ko03030:DNA replication                        | RPA1, POLD2                                                                                              | MCM3                             |
| ko03050:Proteasome                             | PSMB7, PSMA6, PSMD12, PSMB9                                                                              | PSMB7                            |
| ko03420:Nucleotide excision repair             | RPA1, XPC, POLD2                                                                                         | XPC                              |
| ko03440:Homologous recombination               | RPA1, POLD2                                                                                              | NBN, TOP3A, RAD54B, RAD52        |
| ko03450:Non-homologous end-joining             | XRCC5, XRCC6                                                                                             | XRCC4, LIG4                      |
| ko03460:Fanconi anemia pathway                 | RPA1, RMI1                                                                                               | TOP3A                            |
| ko04010:MAPK signaling pathway                 | FGFR1, FGFR4, ATF4, RELB, PPP3CB,<br>MAPK8, FAS, STMN1, TRAF6,<br>NFATC3, HSPA8                          | FGFR2, ELK4, TGFBR1, RAC1, MAPK8 |
| ko04012:ErbB signaling pathway                 | MAPK8                                                                                                    | MAPK8                            |
| ko04014:Ras signaling pathway                  | FGFR1, FGFR4, VEGFA, GRIN1,<br>PLA2G6, MAPK8, PDGFC, EXOC2,<br>EPHA2                                     | FGFR2, RAC1, MAPK8               |
| ko04015:Rap1 signaling pathway                 | ADCY4, FGFR1, FGFR4, TLN1,<br>GRIN1, LPAR4, CTNND1, CDH1,<br>ITGB1, EPHA2, VEGFA, PDGFC,<br>RAPGEF1      | FGFR2, GNAI1, RAC1, LCP2         |
| ko04020:Calcium signaling pathway              | PPIF, CCKAR, ADCY4, SLC25A4,<br>SPHK1, GRIN1, PPP3CB, PLCD1,<br>PTGFR, VDAC3, MYLK                       | RYR3                             |
| ko04022:cGMP-PKG signaling pathway             | PPIF, ADCY4, ATF4, SLC25A4,<br>ROCK2, ATF6B, PPP3CB, PDE3B,<br>ATP1A1, VDAC3, NFATC3, MYLK               | GNAI1, MRVI1, GUCY1B3            |
| ko04024:cAMP signaling pathway                 | ACOX1, ADCY4, ROCK2, GRIN1,<br>PDE3B, ATP1A1, MAPK8                                                      | GNAI1, RAC1, MAPK8               |
| ko04060:Cytokine-cytokine receptor interaction | IFNAR2, VEGFA, IL1RAP, BMPR2,<br>FAS, IL17RA, IFNGR1, ACVR1                                              | TGFBR1                           |

|                                                     |                                                                                                                                                                  |                                                              |
|-----------------------------------------------------|------------------------------------------------------------------------------------------------------------------------------------------------------------------|--------------------------------------------------------------|
| ko04062:Chemokine signaling pathway                 | ADCY4, ROCK2                                                                                                                                                     | GNAI1, RAC1, JAK2                                            |
| ko04066:HIF-1 signaling pathway                     | VEGFA, HK2, IFNGR1                                                                                                                                               | HKDC1                                                        |
| ko04068:FoxO signaling pathway                      | MAPK8, PRKAA1                                                                                                                                                    | TGFBR1, MAPK8, AGAP2                                         |
| ko04070:Phosphatidylinositol signaling system       | IMPA1, PLCD1, OCRL                                                                                                                                               | IMPA1                                                        |
| ko04071:Sphingolipid signaling pathway              | BID, ROCK2, SPHK1, MAPK8                                                                                                                                         | FYN, GNAI1, RAC1, MAPK8, PPP2R2A                             |
| ko04110:Cell cycle                                  | RAD21, CDC20, SMC1A, STAG1                                                                                                                                       | BUB1, PKMYT1, MCM3, CCNA2                                    |
| ko04114:Oocyte meiosis                              | ADCY4, PPP3CB, CDC20, SMC1A                                                                                                                                      | BUB1, PKMYT1                                                 |
| ko04115:p53 signaling pathway                       | BID, RFWD2, RRM2B, FAS                                                                                                                                           | STEAP3, GTSE1                                                |
| ko04120:Ubiquitin mediated proteolysis              | RFWD2, PPIL2, UBE4B, CDC20, KEAP1, TRAF6, UBE2U                                                                                                                  | PPIL2                                                        |
| ko04122:Sulfur relay system                         | MOCS3                                                                                                                                                            | TRMU                                                         |
| ko04130:SNARE interactions in vesicular transport   | STX4, STX3, USE1                                                                                                                                                 | STX1B                                                        |
| ko04141:Protein processing in endoplasmic reticulum | HSPH1, SEC24B, NPLOC4, ATF4, PDIA3, VCP, UFD1L, UBE4B, ATF6B, MAPK8, PDIA4, RPN2, SAR1A, HSPA8, SEL1L                                                            | ATF6, MAPK8, RPN2                                            |
| ko04142:Lysosome                                    | CTSK, LIPA, APIG1, ATP6AP1, LGMN, GALC, ATP6V1H, ATP6V0A1, PPT1, CLN5                                                                                            | AP3M2                                                        |
| ko04144:Endocytosis                                 | CHMP2A, FGFR4, AP2A1, KIAA0196, RUFY1, HGS, CYTH2, VPS35, TRAF6, RAB11FIP1, HSPA8, DNMT1, EPN1                                                                   | FGFR2, TGFBR1, CHMP7, KIF5C, RUFY1, AGAP2, EPN2, DNMT2, EHD4 |
| ko04145:Phagosome                                   | STX12, ATP6AP1, ATP6V1H, HGS, ATP6V0A1, SCARB1, THBS2, ITGB1                                                                                                     | RAC1                                                         |
| ko04146:Peroxisome                                  | ACOX1, GNPAT, SOD1                                                                                                                                               | PEX1                                                         |
| ko04151:PI3K-Akt signaling pathway                  | FGFR1, FGFR4, RXRA, TNC, COL3A1, LPAR4, ITGB1, EPHA2, COL5A1, COL4A6, IFNAR2, ATF4, VEGFA, ATF6B, COL6A3, COL1A2, COL6A1, PDGFC, PRKAA1, COL1A1, THBS2, SYK, FN1 | FGFR2, RAC1, JAK1, JAK2, PPP2R2A                             |

|                                                                  |                                                                                                                                      |                                      |
|------------------------------------------------------------------|--------------------------------------------------------------------------------------------------------------------------------------|--------------------------------------|
| ko04152:AMPK signaling pathway                                   | CPT1B, HMGCR, ADIPOR1, EEF2, PRKAA1                                                                                                  | PFKM, CCNA2, PPP2R2A                 |
| ko04210:Apoptosis                                                | BID, RIPK1, FAS                                                                                                                      | FADD                                 |
| ko04261:Adrenergic signaling in cardiomyocytes                   | ADCY4, ATF4, SCN1B, ATF6B, ATP1A1                                                                                                    | GNAI1, PPP1R1A, PPP2R2A              |
| ko04270:Vascular smooth muscle contraction                       | ADCY4, ROCK2, PLA2G6, MYLK                                                                                                           | MYL6, MRVI1, GUCY1B3                 |
| ko04310:Wnt signaling pathway                                    | ROCK2, PPP3CB, MAPK8, NFATC3, FZD6                                                                                                   | RAC1, MAPK8                          |
| ko04320:Dorso-ventral axis formation                             | FMN2                                                                                                                                 | ETV7                                 |
| ko04350:TGF-beta signaling pathway                               | BMP4, BMPR2, ACVR1                                                                                                                   | INHBE, TGFBR1                        |
| ko04360:Axon guidance                                            | EPHA4, ROCK2, PLXNB2, SEMA3D, NTN4, PPP3CB, SEMA4D, EPHB3, NFATC3, ITGB1, EPHA2                                                      | FYN, GNAI1, RAC1                     |
| ko04370:VEGF signaling pathway                                   | VEGFA, SPHK1, PPP3CB                                                                                                                 | RAC1                                 |
| ko04380:Osteoclast differentiation                               | IFNAR2, CTSK, RELB, PPP3CB, MAPK8, TRAF6, IFNGR1, SYK                                                                                | FYN, TGFBR1, RAC1, JAK1, MAPK8, LCP2 |
| ko04390:Hippo signaling pathway                                  | BMP4, SAV1, BMPR2, CDH1, FZD6                                                                                                        | FRMD6, CTGF, TGFBR1, FRMD1, PPP2R2A  |
| ko04510:Focal adhesion                                           | TLN1, ROCK2, TNC, COL3A1, ITGB1, COL5A1, COL4A6, VCL, VEGFA, COL6A3, COL1A2, COL6A1, MAPK8, PDGFC, COL1A1, RAPGEF1, THBS2, MYLK, FN1 | FYN, RAC1, MAPK8                     |
| ko04512:ECM-receptor interaction                                 | TNC, COL3A1, HSPG2, ITGB1, COL4A6, COL5A1, CD44, COL6A3, COL1A2, COL6A1, COL1A1, THBS2, FN1                                          | HMMR                                 |
| ko04520:Adherens junction                                        | FGFR1, BAIAP2, CTNND1, LMO7, CDH1, VCL                                                                                               | FYN, TGFBR1, RAC1                    |
| ko04530:Tight junction                                           | MYH9, TJAP1                                                                                                                          | GNAI1, TJP2, PPP2R2A                 |
| ko04540:Gap junction                                             | ADCY4, PDGFC                                                                                                                         | GNAI1, GUCY1B3                       |
| ko04550:Signaling pathways regulating pluripotency of stem cells | BMP4, FGFR1, FGFR4, BMPR2, LHX5, ZFH3, ACVR1, FZD6                                                                                   | FGFR2, INHBE, JAK1, JAK2             |



|                                                   |                                                                           |                            |
|---------------------------------------------------|---------------------------------------------------------------------------|----------------------------|
| ko04610:Complement and coagulation cascades       | C1QA, PLAT, C7, FGG, F5, SERPINC1, SERPIND1, F7                           | PROS1                      |
| ko04611:Platelet activation                       | ADCY4, FGG, TLN1, ROCK2, COL3A1, COL1A2, COL1A1, ITGB1, COL5A1, MYLK, SYK | FYN, GNAI1, GUCY1B3, LCP2  |
| ko04620:Toll-like receptor signaling pathway      | IRAK4, IFNAR2, CTSK, RIPK1, MAPK8, TRAF6                                  | RAC1, FADD, MAPK8          |
| ko04621:NOD-like receptor signaling pathway       | MAPK8, TNFAIP3, TRAF6                                                     | MAPK8                      |
| ko04622:RIG-I-like receptor signaling pathway     | TKFC, RIPK1, NLRX1, MAPK8, TRAF6, AZI2                                    | RNF125, FADD, MAPK8        |
| ko04623:Cytosolic DNA-sensing pathway             | RIPK1                                                                     | POLR3A                     |
| ko04630:Jak-STAT signaling pathway                | IFNAR2, SOCS7, IFNGR1                                                     | JAK1, JAK2                 |
| ko04650:Natural killer cell mediated cytotoxicity | BID, IFNAR2, PPP3CB, FAS, IFNGR1, SYK                                     | FYN, RAC1, LCP2            |
| ko04660:T cell receptor signaling pathway         | PPP3CB, NFATC3                                                            | FYN, LCP2                  |
| ko04662:B cell receptor signaling pathway         | PPP3CB, CD79A, NFATC3, SYK                                                | RAC1, CD79A                |
| ko04664:Fc epsilon RI signaling pathway           | MAPK8, SYK                                                                | FYN, RAC1, MAPK8, LCP2     |
| ko04666:Fc gamma R-mediated phagocytosis          | SPHK1, SYK                                                                | RAC1                       |
| ko04668:TNF signaling pathway                     | ATF4, RIPK1, ATF6B, MAPK8, FAS, TNFAIP3                                   | FADD, MAPK8                |
| ko04670:Leukocyte transendothelial migration      | EZR, ROCK2, PECAM1, CTNND1, CD99, ITGB1, VCL, THY1                        | GNAI1, RAC1                |
| ko04710:Circadian rhythm                          | PRKAA1, FBXL3                                                             | PER1                       |
| ko04713:Circadian entrainment                     | ADCY4, GRIN1                                                              | GNAI1, RYR3, PER1, GUCY1B3 |
| ko04720:Long-term potentiation                    | ATF4, GRIN1, PPP3CB                                                       | PPP1R1A                    |
| ko04721:Synaptic vesicle cycle                    | SYT1, STX3, AP2A1, ATP6V1H, ATP6V0A1, DNMI1, NSF                          | CPLX1, STX1B, DNMI2        |
| ko04722:Neurotrophin signaling pathway            | IRAK4, ATF4, MAPK8, TRAF6, RAPGEF1                                        | RAC1, MAPK8                |
| ko04723:Retrograde endocannabinoid signaling      | ADCY4, MAPK8                                                              | GNAI1, MAPK8               |
| ko04724:Glutamatergic synapse                     | ADCY4, GLS, GRIK3, GRM6, GRIN1, PPP3CB                                    | GNAI1                      |

|                                                                   |                                                                            |                                    |
|-------------------------------------------------------------------|----------------------------------------------------------------------------|------------------------------------|
| ko04725:Cholinergic synapse                                       | ADCY4, ATF4                                                                | FYN, GNAI1, JAK2                   |
| ko04727:GABAergic synapse                                         | ADCY4, GLS, NSF                                                            | GNAI1                              |
| ko04728:Dopaminergic synapse                                      | ATF4, ATF6B, PPP3CB, MAPK8                                                 | GNAI1, KIF5C, MAPK8, PPP2R2A       |
| ko04750:Inflammatory mediator regulation of TRP channels          | ADCY4, IL1RAP, PLA2G6, MAPK8                                               | MAPK8                              |
| ko04810:Regulation of actin cytoskeleton                          | FGFR1, FGFR4, EZR, ROCK2, BAIAP2, PDGFC, ITGB1, MYLK, FN1, VCL             | FGFR2, RAC1                        |
| ko04910:Insulin signaling pathway                                 | FLOT2, FLOT1, HK2, PDE3B, MAPK8, PRKAA1, RAPGEF1                           | PPP1R3B, HKDC1, MAPK8              |
| ko04912:GnRH signaling pathway                                    | ADCY4, ATF4, MAPK8                                                         | MAPK8                              |
| ko04914:Progesterone-mediated oocyte maturation                   | ADCY4, PDE3B, MAPK8                                                        | GNAI1, BUB1, PKMYT1, MAPK8, CCNA2  |
| ko04915:Estrogen signaling pathway                                | ADCY4, ATF4, FKBP4, ATF6B, HSPA8                                           | GNAI1                              |
| ko04916:Melanogenesis                                             | ADCY4, FZD6                                                                | GNAI1                              |
| ko04917:Prolactin signaling pathway                               | SOCS7, MAPK8                                                               | JAK2, MAPK8                        |
| ko04919:Thyroid hormone signaling pathway                         | SIN3A, RXRA, MED24, PLCD1, ATP1A1                                          | HDAC3                              |
| ko04920:Adipocytokine signaling pathway                           | CPT1B, RXRA, ADIPOR1, MAPK8, PRKAA1                                        | JAK2, MAPK8                        |
| ko04921:Oxytocin signaling pathway                                | ADCY4, ROCK2, PPP3CB, EEF2, PRKAA1, NFATC3, MYLK                           | MYL6, CAMK1G, GNAI1, RYR3, GUCY1B3 |
| ko04923:Regulation of lipolysis in adipocytes                     | ADCY4, PDE3B                                                               | GNAI1                              |
| ko04924:Renin secretion                                           | PPP3CB, PDE3B                                                              | GNAI1, GUCY1B3                     |
| ko04925:Aldosterone synthesis and secretion                       | ADCY4, ATF4, ATF6B, SCARB1, ATF1                                           | CAMK1G, ATF1                       |
| ko04930:Type II diabetes mellitus                                 | HK2, MAPK8, KCNJ11                                                         | HKDC1, MAPK8                       |
| ko04931:Insulin resistance                                        | CPT1B, MAPK8, PRKAA1                                                       | PPP1R3B, MAPK8                     |
| ko04932:Non-alcoholic fatty liver disease (NAFLD)                 | BID, SDHA, ATF4, NDUFA6, RXRA, NDUFB9, COX4I1, ADIPOR1, MAPK8, PRKAA1, FAS | RAC1, MAPK8                        |
| ko04961:Endocrine and other factor-regulated calcium reabsorption | AP2A1, ATP1A1, CALB1, DNMI                                                 | DNM2                               |
| ko04964:Proximal tubule bicarbonate reclamation                   | GLS, ATP1A1                                                                | CA4                                |
| ko04970:Salivary secretion                                        | ADCY4, ATP1A1                                                              | RYR3, GUCY1B3                      |

|                                                   |                                                                                                 |                                    |
|---------------------------------------------------|-------------------------------------------------------------------------------------------------|------------------------------------|
| ko04971:Gastric acid secretion                    | ADCY4, EZR, ATP1A1, MYLK                                                                        | GNAI1                              |
| ko04972:Pancreatic secretion                      | CCKAR, ADCY4, ATP1A1                                                                            | RAC1                               |
| ko04973:Carbohydrate digestion and absorption     | SLC37A4, HK2, ATP1A1                                                                            | HKDC1                              |
| ko04978:Mineral absorption                        | HMOX1, ATP1A1                                                                                   | SLC40A1                            |
| ko05010:Alzheimer's disease                       | BID, SDHA, NDUFA6, NDUFB9,<br>GRIN1, PPP3CB, COX4I1, ADAM17,<br>FAS                             | ATF6, CDK5R1, RYR3, FADD           |
| ko05012:Parkinson's disease                       | SDHA, PPIF, SLC25A4, NDUFA6,<br>NDUFB9, COX4I1, VDAC3                                           | GNAI1                              |
| ko05014:Amyotrophic lateral sclerosis (ALS)       | BID, GRIN1, PPP3CB, SOD1                                                                        | RAC1                               |
| ko05020:Prion diseases                            | C1QA, C7, SOD1                                                                                  | FYN                                |
| ko05030:Cocaine addiction                         | ATF4, ATF6B, GRIN1                                                                              | CDK5R1, GNAI1                      |
| ko05032:Morphine addiction                        | ADCY4, PDE3B                                                                                    | GNAI1                              |
| ko05034:Alcoholism                                | ATF4, ATF6B, GRIN1, PKIA                                                                        | HDAC3, GNAI1, HDAC8                |
| ko05100:Bacterial invasion of epithelial cells    | CDH1, ITGB1, DNM1, FN1, VCL                                                                     | RAC1, DNM2                         |
| ko05132:Salmonella infection                      | ROCK2, MAPK8, IFNGR1                                                                            | RAC1, MAPK8                        |
| ko05133:Pertussis                                 | IRAK4, C1QA, MAPK8, TRAF6,<br>ITGB1                                                             | GNAI1, MAPK8                       |
| ko05140:Leishmaniasis                             | IRAK4, TRAF6, ITGB1, IFNGR1                                                                     | JAK1, JAK2                         |
| ko05142:Chagas disease (American trypanosomiasis) | IRAK4, C1QA, MAPK8, FAS, TRAF6,<br>IFNGR1                                                       | GNAI1, TGFB1, FADD, MAPK8, PPP2R2A |
| ko05145:Toxoplasmosis                             | IRAK4, PPIF, MAPK8, TRAF6, ITGB1,<br>HSPA8, IFNGR1                                              | GNAI1, JAK1, JAK2, MAPK8           |
| ko05152:Tuberculosis                              | BID, IRAK4, ATP6AP1, SPHK1,<br>PPP3CB, NFYC, ATP6V1H,<br>ATP6V0A1, MAPK8, TRAF6, IFNGR1,<br>SYK | JAK1, FADD, JAK2, MAPK8            |
| ko05160:Hepatitis C                               | IFNAR2, RIPK1, RXRA, MAPK8,<br>SCARB1, TRAF6                                                    | JAK1, MAPK8, PPP2R2A               |
| ko05161:Hepatitis B                               | ATF4, ATP6AP1, ATF6B, HSPG2,<br>MAPK8, FAS, VDAC3, NFATC3                                       | TGFB1, JAK1, FADD, MAPK8, CCNA2    |
| ko05162:Measles                                   | IRAK4, IFNAR2, EIF3H, FAS,<br>TNFAIP3, TRAF6, HSPA8, IFNGR1                                     | FYN, JAK1, JAK2                    |

|                                                 |                                                                                                                          |                                              |
|-------------------------------------------------|--------------------------------------------------------------------------------------------------------------------------|----------------------------------------------|
| ko05164:Influenza A                             | IRAK4, IFNAR2, NLRX1, MAPK8, FAS, HSPA8, IFNGR1                                                                          | FDPS, JAK1, JAK2, MAPK8, TMPRSS13            |
| ko05166:HTLV-I infection                        | ADCY4, TLN1, ATF4, SLC25A4, RELB, POLD2, PPP3CB, CDC20, VDAC3, NFATC3, ATF1, FZD6                                        | ELK4, TGFB1, FDPS, JAK1, ATF1                |
| ko05168:Herpes simplex infection                | CFP, HMG1, TAF10, IFNAR2, MAPK8, FAS, TRAF6, IFNGR1                                                                      | JAK1, PER1, FADD, JAK2, MAPK8                |
| ko05169:Epstein-Barr virus infection            | CD44, PSMD12, RIPK1, SND1, RELB, MAPK8, TNFAIP3, TRAF6, HSPA8, SYK                                                       | VIM, JAK1, POLR3A, MAPK8, CCNA2              |
| ko05200:Pathways in cancer                      | BID, BMP4, FGFR1, ADCY4, ROCK2, STK36, RXRA, LPAR4, CDH1, ITGB1, COL4A6, FZD6, CCDC6, VEGFA, MAPK8, FAS, TRAF6, TPR, FN1 | FGFR2, GNAI1, TGFB1, RAC1, JAK1, FADD, MAPK8 |
| ko05202:Transcriptional misregulation in cancer | PLAT, MEN1, FUS, SIN3A, RXRA, SPINT1, PBX1, CDK14, ATF1                                                                  | ETV7, ELK4, ATF1                             |
| ko05203:Viral carcinogenesis                    | HPN, ATF4, GTF2A1, SND1, ATF6B, CDC20, VDAC3, SYK                                                                        | HDAC3, RAC1, JAK1, HDAC8, CCNA2              |
| ko05205:Proteoglycans in cancer                 | FGFR1, EZR, CD44, ROCK2, VEGFA, HSPG2, FAS, PDCD4, ITGB1, FN1, FZD6                                                      | RAC1                                         |
| ko05206:MicroRNAs in cancer                     | EZR, CD44, GLS, TNC, VEGFA, BMPR2, STMN1, PDCD4                                                                          | VIM                                          |
| ko05210:Colorectal cancer                       | MAPK8                                                                                                                    | TGFB1, RAC1, MAPK8                           |
| ko05211:Renal cell carcinoma                    | VEGFA, RAPGEF1                                                                                                           | RAC1                                         |
| ko05212:Pancreatic cancer                       | VEGFA, MAPK8                                                                                                             | TGFB1, RAC1, JAK1, MAPK8                     |
| ko05215:Prostate cancer                         | FGFR1, ATF4, PDGFC                                                                                                       | FGFR2                                        |
| ko05230:Central carbon metabolism in cancer     | FGFR1, G6PD, GLS, HK2, SIRT6                                                                                             | FGFR2, HKDC1, PFKM                           |
| ko05231:Choline metabolism in cancer            | CHKA, SLC44A2, PCYT1A, MAPK8, PDGFC                                                                                      | RAC1, MAPK8                                  |
| ko05340:Primary immunodeficiency                | CD79A                                                                                                                    | CD79A                                        |
| ko05416:Viral myocarditis                       | BID, EIF4G3                                                                                                              | FYN, RAC1                                    |

**Table S32. The reference list of hypoxia-responsive categories constructed in this study.**

| category   | pvalue   | numDEInCat | numInCat | term                                                                              |
|------------|----------|------------|----------|-----------------------------------------------------------------------------------|
| GO:0001666 | 4.79E-28 | 69         | 276      | response to hypoxia                                                               |
| GO:0070482 | 3.78E-27 | 71         | 301      | response to oxygen levels                                                         |
| GO:0044057 | 7.43E-15 | 67         | 441      | regulation of system process                                                      |
| GO:1901342 | 1.86E-13 | 45         | 240      | regulation of vasculature development                                             |
| GO:1903522 | 3.76E-13 | 43         | 226      | regulation of blood circulation                                                   |
| GO:0042493 | 1.51E-12 | 56         | 372      | response to drug                                                                  |
| GO:0010038 | 1.70E-11 | 46         | 288      | response to metal ion                                                             |
| GO:0048511 | 3.31E-11 | 47         | 294      | rhythmic process                                                                  |
| GO:1903649 | 4.97E-11 | 53         | 368      | regulation of cytoplasmic transport                                               |
| GO:0006979 | 5.57E-11 | 49         | 341      | response to oxidative stress                                                      |
| GO:0007568 | 2.81E-10 | 39         | 243      | aging                                                                             |
| GO:0009612 | 2.97E-10 | 34         | 177      | response to mechanical stimulus                                                   |
| GO:0050795 | 3.28E-10 | 40         | 264      | regulation of behavior                                                            |
| GO:0048520 | 4.65E-10 | 29         | 164      | positive regulation of behavior                                                   |
| GO:0032970 | 1.28E-09 | 46         | 309      | regulation of actin filament-based process                                        |
| GO:0006096 | 1.51E-09 | 15         | 41       | glycolytic process                                                                |
| GO:0043620 | 7.20E-09 | 18         | 64       | regulation of DNA-templated transcription in response to stress                   |
| GO:2000377 | 4.03E-08 | 28         | 173      | regulation of reactive oxygen species metabolic process                           |
| GO:0098900 | 4.24E-08 | 13         | 35       | regulation of action potential                                                    |
| GO:0048771 | 4.91E-08 | 17         | 65       | tissue remodeling                                                                 |
| GO:0043618 | 6.61E-08 | 16         | 58       | regulation of transcription from RNA polymerase II promoter in response to stress |
| GO:0090559 | 8.43E-08 | 11         | 30       | regulation of membrane permeability                                               |
| GO:0031667 | 9.58E-08 | 47         | 394      | response to nutrient levels                                                       |
| GO:0033238 | 1.57E-07 | 49         | 429      | regulation of cellular amine metabolic process                                    |
| GO:0010950 | 1.73E-07 | 25         | 146      | positive regulation of endopeptidase activity                                     |
| GO:0048193 | 1.83E-07 | 42         | 309      | Golgi vesicle transport                                                           |
| GO:0046902 | 1.90E-07 | 10         | 27       | regulation of mitochondrial membrane permeability                                 |
| GO:0006521 | 2.42E-07 | 47         | 405      | regulation of cellular amino acid metabolic process                               |

|            |          |    |     |                                                                  |
|------------|----------|----|-----|------------------------------------------------------------------|
| GO:0006874 | 2.62E-07 | 41 | 326 | cellular calcium ion homeostasis                                 |
| GO:0034405 | 2.70E-07 | 12 | 35  | response to fluid shear stress                                   |
| GO:0070849 | 2.73E-07 | 12 | 34  | response to epidermal growth factor                              |
| GO:0051924 | 2.84E-07 | 32 | 224 | regulation of calcium ion transport                              |
| GO:0009611 | 5.20E-07 | 28 | 184 | response to wounding                                             |
| GO:0007623 | 5.46E-07 | 24 | 139 | circadian rhythm                                                 |
| GO:0043627 | 5.78E-07 | 27 | 176 | response to estrogen                                             |
| GO:0044264 | 6.42E-07 | 16 | 67  | cellular polysaccharide metabolic process                        |
| GO:0048729 | 7.68E-07 | 46 | 372 | tissue morphogenesis                                             |
| GO:1903426 | 8.04E-07 | 17 | 85  | regulation of reactive oxygen species biosynthetic process       |
| GO:0034330 | 8.15E-07 | 31 | 197 | cell junction organization                                       |
| GO:0032844 | 9.50E-07 | 48 | 425 | regulation of homeostatic process                                |
| GO:1901654 | 1.06E-06 | 23 | 140 | response to ketone                                               |
| GO:0045216 | 1.13E-06 | 28 | 173 | cell-cell junction organization                                  |
| GO:0072593 | 1.26E-06 | 20 | 111 | reactive oxygen species metabolic process                        |
| GO:0007005 | 1.52E-06 | 34 | 281 | mitochondrion organization                                       |
| GO:0030029 | 1.71E-06 | 44 | 342 | actin filament-based process                                     |
| GO:0006112 | 1.75E-06 | 15 | 64  | energy reserve metabolic process                                 |
| GO:0051384 | 1.79E-06 | 22 | 144 | response to glucocorticoid                                       |
| GO:0035924 | 2.14E-06 | 9  | 22  | cellular response to vascular endothelial growth factor stimulus |
| GO:0005976 | 2.49E-06 | 16 | 74  | polysaccharide metabolic process                                 |
| GO:0006892 | 2.56E-06 | 18 | 88  | post-Golgi vesicle-mediated transport                            |
| GO:0034112 | 4.09E-06 | 34 | 296 | positive regulation of homotypic cell-cell adhesion              |
| GO:0023014 | 4.81E-06 | 38 | 319 | signal transduction by protein phosphorylation                   |
| GO:0071364 | 5.22E-06 | 10 | 30  | cellular response to epidermal growth factor stimulus            |
| GO:0044262 | 7.03E-06 | 21 | 130 | cellular carbohydrate metabolic process                          |
| GO:0046677 | 7.06E-06 | 11 | 42  | response to antibiotic                                           |
| GO:0001974 | 9.13E-06 | 10 | 33  | blood vessel remodeling                                          |
| GO:0001763 | 9.24E-06 | 25 | 167 | morphogenesis of a branching structure                           |
| GO:0051146 | 9.56E-06 | 12 | 47  | striated muscle cell differentiation                             |

|            |          |    |     |                                                                      |
|------------|----------|----|-----|----------------------------------------------------------------------|
| GO:0048017 | 9.70E-06 | 21 | 124 | inositol lipid-mediated signaling                                    |
| GO:0046683 | 1.11E-05 | 21 | 131 | response to organophosphorus                                         |
| GO:0090066 | 1.17E-05 | 33 | 266 | regulation of anatomical structure size                              |
| GO:0010906 | 1.18E-05 | 18 | 107 | regulation of glucose metabolic process                              |
| GO:0071260 | 1.25E-05 | 14 | 68  | cellular response to mechanical stimulus                             |
| GO:0015749 | 1.46E-05 | 12 | 52  | monosaccharide transport                                             |
| GO:0007265 | 1.54E-05 | 23 | 157 | Ras protein signal transduction                                      |
| GO:0000165 | 1.74E-05 | 36 | 313 | MAPK cascade                                                         |
| GO:0032409 | 1.77E-05 | 27 | 205 | regulation of transporter activity                                   |
| GO:2000736 | 1.94E-05 | 20 | 127 | regulation of stem cell differentiation                              |
| GO:0033483 | 1.99E-05 | 5  | 8   | gas homeostasis                                                      |
| GO:1990267 | 2.02E-05 | 18 | 114 | response to transition metal nanoparticle                            |
| GO:0001101 | 2.04E-05 | 36 | 317 | response to acid chemical                                            |
| GO:0048015 | 2.24E-05 | 20 | 121 | phosphatidylinositol-mediated signaling                              |
| GO:0060306 | 2.30E-05 | 9  | 30  | regulation of membrane repolarization                                |
| GO:0006109 | 2.36E-05 | 24 | 176 | regulation of carbohydrate metabolic process                         |
| GO:0040007 | 2.62E-05 | 41 | 360 | growth                                                               |
| GO:0048872 | 2.91E-05 | 18 | 111 | homeostasis of number of cells                                       |
| GO:0002931 | 2.98E-05 | 9  | 32  | response to ischemia                                                 |
| GO:0031647 | 3.42E-05 | 29 | 238 | regulation of protein stability                                      |
| GO:0007264 | 3.88E-05 | 39 | 382 | small GTPase mediated signal transduction                            |
| GO:0042391 | 4.53E-05 | 36 | 311 | regulation of membrane potential                                     |
| GO:0021700 | 4.83E-05 | 22 | 159 | developmental maturation                                             |
| GO:0032570 | 5.09E-05 | 10 | 42  | response to progesterone                                             |
| GO:0002634 | 5.27E-05 | 5  | 9   | regulation of germinal center formation                              |
| GO:0044252 | 5.67E-05 | 5  | 10  | negative regulation of multicellular organismal metabolic process    |
| GO:0031958 | 6.19E-05 | 5  | 8   | corticosteroid receptor signaling pathway                            |
| GO:0051133 | 7.93E-05 | 4  | 6   | regulation of NK T cell activation                                   |
| GO:0010575 | 8.51E-05 | 8  | 26  | positive regulation of vascular endothelial growth factor production |
| GO:1900182 | 8.73E-05 | 19 | 131 | positive regulation of protein localization to nucleus               |

|            |             |    |     |                                                                                                                           |
|------------|-------------|----|-----|---------------------------------------------------------------------------------------------------------------------------|
| GO:0010506 | 8.85E-05    | 30 | 259 | regulation of autophagy                                                                                                   |
| GO:0032507 | 0.000101979 | 19 | 123 | maintenance of protein location in cell                                                                                   |
| GO:0032364 | 0.000102479 | 4  | 6   | oxygen homeostasis                                                                                                        |
| GO:0035239 | 0.000103261 | 31 | 263 | tube morphogenesis                                                                                                        |
| GO:0031657 | 0.000107467 | 5  | 10  | regulation of cyclin-dependent protein serine/threonine kinase activity involved in G1/S transition of mitotic cell cycle |
| GO:0090087 | 0.000111546 | 29 | 263 | regulation of peptide transport                                                                                           |
| GO:0048732 | 0.000115664 | 27 | 225 | gland development                                                                                                         |
| GO:0035637 | 0.000118919 | 14 | 77  | multicellular organismal signaling                                                                                        |
| GO:0034109 | 0.000125768 | 31 | 286 | homotypic cell-cell adhesion                                                                                              |
| GO:0007589 | 0.00013653  | 13 | 75  | body fluid secretion                                                                                                      |
| GO:0042770 | 0.00014291  | 16 | 100 | signal transduction in response to DNA damage                                                                             |
| GO:0045599 | 0.000155875 | 10 | 49  | negative regulation of fat cell differentiation                                                                           |
| GO:0000904 | 0.00015603  | 22 | 160 | cell morphogenesis involved in differentiation                                                                            |
| GO:0019932 | 0.000157378 | 22 | 166 | second-messenger-mediated signaling                                                                                       |
| GO:0006022 | 0.000158975 | 22 | 168 | aminoglycan metabolic process                                                                                             |
| GO:0002260 | 0.000161037 | 10 | 47  | lymphocyte homeostasis                                                                                                    |
| GO:0008643 | 0.000172484 | 14 | 88  | carbohydrate transport                                                                                                    |
| GO:0046685 | 0.000182755 | 7  | 25  | response to arsenic-containing substance                                                                                  |
| GO:0045778 | 0.000182823 | 14 | 88  | positive regulation of ossification                                                                                       |
| GO:0051235 | 0.000184324 | 24 | 191 | maintenance of location                                                                                                   |
| GO:0051660 | 0.000192424 | 3  | 3   | establishment of centrosome localization                                                                                  |
| GO:0016197 | 0.000192965 | 28 | 241 | endosomal transport                                                                                                       |
| GO:0033280 | 0.000195067 | 7  | 26  | response to vitamin D                                                                                                     |
| GO:0030953 | 0.000205937 | 4  | 6   | astral microtubule organization                                                                                           |
| GO:0032941 | 0.000206722 | 12 | 67  | secretion by tissue                                                                                                       |
| GO:0030203 | 0.000241609 | 21 | 161 | glycosaminoglycan metabolic process                                                                                       |
| GO:0051591 | 0.000263254 | 15 | 95  | response to cAMP                                                                                                          |
| GO:0034976 | 0.000264779 | 20 | 155 | response to endoplasmic reticulum stress                                                                                  |
| GO:0061077 | 0.000297262 | 9  | 45  | chaperone-mediated protein folding                                                                                        |



|            |             |    |     |                                                                |
|------------|-------------|----|-----|----------------------------------------------------------------|
| GO:0007034 | 0.000334571 | 16 | 106 | vacuolar transport                                             |
| GO:0035020 | 0.000335614 | 5  | 11  | regulation of Rac protein signal transduction                  |
| GO:0030330 | 0.000341439 | 14 | 87  | DNA damage response, signal transduction by p53 class mediator |
| GO:0030212 | 0.000348302 | 8  | 31  | hyaluronan metabolic process                                   |
| GO:0031102 | 0.000352476 | 7  | 26  | neuron projection regeneration                                 |
| GO:1902083 | 0.000398481 | 3  | 3   | negative regulation of peptidyl-cysteine S-nitrosylation       |
| GO:1903510 | 0.000473703 | 16 | 110 | mucopolysaccharide metabolic process                           |
| GO:0008626 | 0.000530247 | 3  | 4   | granzyme-mediated apoptotic signaling pathway                  |
| GO:0043467 | 0.000556347 | 13 | 85  | regulation of generation of precursor metabolites and energy   |
| GO:0032909 | 0.000559071 | 4  | 8   | regulation of transforming growth factor beta2 production      |
| GO:0001889 | 0.000566654 | 14 | 95  | liver development                                              |
| GO:1903650 | 0.000597917 | 14 | 98  | negative regulation of cytoplasmic transport                   |
| GO:0050878 | 0.000662273 | 32 | 322 | regulation of body fluid levels                                |
| GO:0048598 | 0.000677811 | 40 | 418 | embryonic morphogenesis                                        |
| GO:2001057 | 0.000694294 | 7  | 30  | reactive nitrogen species metabolic process                    |
| GO:0060396 | 0.00069785  | 4  | 8   | growth hormone receptor signaling pathway                      |
| GO:1901605 | 0.000714736 | 26 | 253 | alpha-amino acid metabolic process                             |
| GO:0097094 | 0.000745913 | 5  | 14  | craniofacial suture morphogenesis                              |
| GO:0006820 | 0.000767576 | 44 | 479 | anion transport                                                |
| GO:0018108 | 0.000782326 | 13 | 76  | peptidyl-tyrosine phosphorylation                              |
| GO:0045444 | 0.000784843 | 15 | 112 | fat cell differentiation                                       |
| GO:0018401 | 0.000870764 | 3  | 5   | peptidyl-proline hydroxylation to 4-hydroxy-L-proline          |
| GO:0060191 | 0.000895013 | 12 | 79  | regulation of lipase activity                                  |
| GO:0030522 | 0.00090879  | 18 | 137 | intracellular receptor signaling pathway                       |
| GO:0002576 | 0.000914039 | 14 | 95  | platelet degranulation                                         |
| GO:0051781 | 0.000929464 | 16 | 128 | positive regulation of cell division                           |
| GO:0018212 | 0.000957974 | 13 | 78  | peptidyl-tyrosine modification                                 |
| GO:0051100 | 0.000980188 | 16 | 123 | negative regulation of binding                                 |
| GO:0006953 | 0.000980932 | 8  | 43  | acute-phase response                                           |
| GO:0060395 | 0.000993347 | 10 | 59  | SMAD protein signal transduction                               |

|            |             |    |     |                                                                                |
|------------|-------------|----|-----|--------------------------------------------------------------------------------|
| GO:0072584 | 0.0010055   | 3  | 5   | caveolin-mediated endocytosis                                                  |
| GO:0045740 | 0.001025674 | 13 | 91  | positive regulation of DNA replication                                         |
| GO:0007528 | 0.001078176 | 8  | 32  | neuromuscular junction development                                             |
| GO:0032228 | 0.0010933   | 7  | 30  | regulation of synaptic transmission, GABAergic                                 |
| GO:0051302 | 0.001166085 | 27 | 263 | regulation of cell division                                                    |
| GO:0036120 | 0.001178252 | 5  | 16  | cellular response to platelet-derived growth factor stimulus                   |
| GO:0006693 | 0.001183199 | 6  | 27  | prostaglandin metabolic process                                                |
| GO:0060263 | 0.001249393 | 4  | 11  | regulation of respiratory burst                                                |
| GO:0042541 | 0.001279716 | 3  | 5   | hemoglobin biosynthetic process                                                |
| GO:0007041 | 0.001283824 | 12 | 74  | lysosomal transport                                                            |
| GO:0015711 | 0.001480493 | 34 | 353 | organic anion transport                                                        |
| GO:0010518 | 0.00148745  | 9  | 51  | positive regulation of phospholipase activity                                  |
| GO:0072331 | 0.001566527 | 17 | 138 | signal transduction by p53 class mediator                                      |
| GO:0071236 | 0.001613253 | 4  | 11  | cellular response to antibiotic                                                |
| GO:0090265 | 0.001614822 | 2  | 2   | positive regulation of immune complex clearance by monocytes and macrophages   |
| GO:0051769 | 0.00162532  | 5  | 17  | regulation of nitric-oxide synthase biosynthetic process                       |
| GO:0032846 | 0.001632284 | 21 | 195 | positive regulation of homeostatic process                                     |
| GO:1901184 | 0.00163285  | 12 | 81  | regulation of ERBB signaling pathway                                           |
| GO:0036119 | 0.001665758 | 5  | 17  | response to platelet-derived growth factor                                     |
| GO:0038093 | 0.001682085 | 19 | 171 | Fc receptor signaling pathway                                                  |
| GO:0006366 | 0.001754785 | 32 | 332 | transcription from RNA polymerase II promoter                                  |
| GO:0045649 | 0.001809847 | 5  | 19  | regulation of macrophage differentiation                                       |
| GO:0010877 | 0.001813345 | 2  | 2   | lipid transport involved in lipid storage                                      |
| GO:0050821 | 0.001821354 | 17 | 143 | protein stabilization                                                          |
| GO:0019722 | 0.001843729 | 13 | 94  | calcium-mediated signaling                                                     |
| GO:0010649 | 0.00186482  | 4  | 10  | regulation of cell communication by electrical coupling                        |
| GO:1901300 | 0.001949257 | 3  | 5   | positive regulation of hydrogen peroxide-mediated programmed cell death        |
| GO:1902041 | 0.001982834 | 9  | 53  | regulation of extrinsic apoptotic signaling pathway via death domain receptors |
| GO:0002366 | 0.001990342 | 16 | 137 | leukocyte activation involved in immune response                               |
| GO:2000191 | 0.00202748  | 6  | 26  | regulation of fatty acid transport                                             |

|            |             |    |     |                                                                       |
|------------|-------------|----|-----|-----------------------------------------------------------------------|
| GO:0034696 | 0.002050077 | 2  | 2   | response to prostaglandin F                                           |
| GO:1901387 | 0.002066332 | 3  | 6   | positive regulation of voltage-gated calcium channel activity         |
| GO:1902966 | 0.00210754  | 3  | 5   | positive regulation of protein localization to early endosome         |
| GO:0010455 | 0.002110521 | 4  | 12  | positive regulation of cell fate commitment                           |
| GO:0043547 | 0.002131253 | 16 | 144 | positive regulation of GTPase activity                                |
| GO:2000378 | 0.002139585 | 8  | 46  | negative regulation of reactive oxygen species metabolic process      |
| GO:0032355 | 0.002192781 | 14 | 113 | response to estradiol                                                 |
| GO:0035902 | 0.002205505 | 5  | 19  | response to immobilization stress                                     |
| GO:0000910 | 0.002222394 | 12 | 78  | cytokinesis                                                           |
| GO:1902567 | 0.002225685 | 2  | 2   | negative regulation of eosinophil activation                          |
| GO:0070256 | 0.002273928 | 2  | 2   | negative regulation of mucus secretion                                |
| GO:0032070 | 0.002309916 | 3  | 6   | regulation of deoxyribonuclease activity                              |
| GO:0002880 | 0.002346388 | 2  | 2   | regulation of chronic inflammatory response to non-antigenic stimulus |
| GO:0009314 | 0.002351914 | 38 | 427 | response to radiation                                                 |
| GO:0071505 | 0.002357164 | 2  | 2   | response to mycophenolic acid                                         |
| GO:0071506 | 0.002357164 | 2  | 2   | cellular response to mycophenolic acid                                |
| GO:0031589 | 0.002363065 | 20 | 159 | cell-substrate adhesion                                               |
| GO:1900744 | 0.002375571 | 6  | 24  | regulation of p38MAPK cascade                                         |
| GO:0032890 | 0.00238423  | 8  | 47  | regulation of organic acid transport                                  |
| GO:0098903 | 0.002445018 | 3  | 6   | regulation of membrane repolarization during action potential         |
| GO:0071498 | 0.002462121 | 5  | 18  | cellular response to fluid shear stress                               |
| GO:2000352 | 0.002469463 | 6  | 25  | negative regulation of endothelial cell apoptotic process             |
| GO:1902745 | 0.002504551 | 6  | 25  | positive regulation of lamellipodium organization                     |
| GO:0097306 | 0.002540025 | 13 | 98  | cellular response to alcohol                                          |
| GO:0006457 | 0.002589113 | 22 | 228 | protein folding                                                       |
| GO:0043124 | 0.002612888 | 9  | 54  | negative regulation of I-kappaB kinase/NF-kappaB signaling            |
| GO:0018209 | 0.002734088 | 18 | 149 | peptidyl-serine modification                                          |
| GO:0035873 | 0.002815105 | 4  | 12  | lactate transmembrane transport                                       |
| GO:0009743 | 0.002816933 | 17 | 153 | response to carbohydrate                                              |
| GO:1900542 | 0.002949754 | 19 | 177 | regulation of purine nucleotide metabolic process                     |

|            |             |    |     |                                                                                            |
|------------|-------------|----|-----|--------------------------------------------------------------------------------------------|
| GO:0048661 | 0.00297601  | 10 | 72  | positive regulation of smooth muscle cell proliferation                                    |
| GO:0001300 | 0.002976164 | 2  | 2   | chronological cell aging                                                                   |
| GO:0032069 | 0.002996437 | 5  | 20  | regulation of nuclease activity                                                            |
| GO:0015920 | 0.00299805  | 2  | 2   | lipopolysaccharide transport                                                               |
| GO:0070483 | 0.003000079 | 2  | 2   | detection of hypoxia                                                                       |
| GO:0019471 | 0.00302249  | 4  | 13  | 4-hydroxyproline metabolic process                                                         |
| GO:1901655 | 0.003036835 | 9  | 57  | cellular response to ketone                                                                |
| GO:0098801 | 0.00303882  | 6  | 31  | regulation of renal system process                                                         |
| GO:0002523 | 0.003039638 | 4  | 14  | leukocyte migration involved in inflammatory response                                      |
| GO:1901216 | 0.003071248 | 10 | 67  | positive regulation of neuron death                                                        |
| GO:0045188 | 0.003120654 | 3  | 7   | regulation of circadian sleep/wake cycle, non-REM sleep                                    |
| GO:0006986 | 0.003127168 | 8  | 49  | response to unfolded protein                                                               |
| GO:0006816 | 0.003141704 | 20 | 177 | calcium ion transport                                                                      |
| GO:0035428 | 0.003172074 | 2  | 2   | hexose transmembrane transport                                                             |
| GO:0019318 | 0.003186344 | 18 | 168 | hexose metabolic process                                                                   |
| GO:0048286 | 0.003201022 | 7  | 35  | lung alveolus development                                                                  |
| GO:0009746 | 0.003238548 | 15 | 130 | response to hexose                                                                         |
| GO:0097296 | 0.003241624 | 4  | 13  | activation of cysteine-type endopeptidase activity involved in apoptotic signaling pathway |
| GO:0014706 | 0.003435535 | 11 | 79  | striated muscle tissue development                                                         |
| GO:0018277 | 0.003466472 | 2  | 2   | protein deamination                                                                        |
| GO:0014910 | 0.003491604 | 8  | 48  | regulation of smooth muscle cell migration                                                 |
| GO:1903242 | 0.003493275 | 3  | 6   | regulation of cardiac muscle hypertrophy in response to stress                             |
| GO:0001649 | 0.003584421 | 13 | 102 | osteoblast differentiation                                                                 |
| GO:0006417 | 0.00362638  | 28 | 306 | regulation of translation                                                                  |
| GO:1902950 | 0.003703255 | 2  | 2   | regulation of dendritic spine maintenance                                                  |
| GO:0006206 | 0.003733381 | 5  | 19  | pyrimidine nucleobase metabolic process                                                    |
| GO:0050818 | 0.003799541 | 12 | 92  | regulation of coagulation                                                                  |
| GO:0051147 | 0.003830753 | 18 | 171 | regulation of muscle cell differentiation                                                  |
| GO:1901137 | 0.003872233 | 35 | 420 | carbohydrate derivative biosynthetic process                                               |

|            |             |    |     |                                                                                             |
|------------|-------------|----|-----|---------------------------------------------------------------------------------------------|
| GO:0044557 | 0.003887294 | 3  | 7   | relaxation of smooth muscle                                                                 |
| GO:0072524 | 0.003919731 | 9  | 62  | pyridine-containing compound metabolic process                                              |
| GO:1903689 | 0.003951948 | 3  | 5   | regulation of wound healing, spreading of epidermal cells                                   |
| GO:0005980 | 0.003984229 | 5  | 18  | glycogen catabolic process                                                                  |
| GO:0050872 | 0.004107168 | 4  | 13  | white fat cell differentiation                                                              |
| GO:0015850 | 0.004135327 | 16 | 138 | organic hydroxy compound transport                                                          |
| GO:0035335 | 0.004155244 | 5  | 20  | peptidyl-tyrosine dephosphorylation                                                         |
| GO:0006509 | 0.004257909 | 5  | 20  | membrane protein ectodomain proteolysis                                                     |
| GO:0003013 | 0.004263692 | 16 | 142 | circulatory system process                                                                  |
| GO:0007259 | 0.00427564  | 7  | 39  | JAK-STAT cascade                                                                            |
| GO:0016264 | 0.004282079 | 3  | 7   | gap junction assembly                                                                       |
| GO:0048873 | 0.004303269 | 6  | 30  | homeostasis of number of cells within a tissue                                              |
| GO:0033206 | 0.004335883 | 3  | 6   | meiotic cytokinesis                                                                         |
| GO:0043173 | 0.004442999 | 4  | 14  | nucleotide salvage                                                                          |
| GO:1902728 | 0.004443661 | 2  | 2   | positive regulation of growth factor dependent skeletal muscle satellite cell proliferation |
| GO:0006769 | 0.004615986 | 3  | 7   | nicotinamide metabolic process                                                              |
| GO:0044708 | 0.004624063 | 35 | 386 | single-organism behavior                                                                    |
| GO:0071354 | 0.004714373 | 4  | 14  | cellular response to interleukin-6                                                          |
| GO:0046164 | 0.004715213 | 9  | 60  | alcohol catabolic process                                                                   |
| GO:0010469 | 0.004896424 | 11 | 78  | regulation of receptor activity                                                             |
| GO:0042476 | 0.004978672 | 12 | 92  | odontogenesis                                                                               |
| GO:0046777 | 0.005046902 | 23 | 209 | protein autophosphorylation                                                                 |
| GO:0071877 | 0.005049247 | 3  | 7   | regulation of adrenergic receptor signaling pathway                                         |
| GO:0051220 | 0.005104273 | 6  | 30  | cytoplasmic sequestering of protein                                                         |
| GO:0010621 | 0.005145439 | 2  | 3   | negative regulation of transcription by transcription factor localization                   |
| GO:0006901 | 0.005288621 | 10 | 70  | vesicle coating                                                                             |
| GO:0046394 | 0.005331606 | 25 | 276 | carboxylic acid biosynthetic process                                                        |
| GO:0009112 | 0.005446022 | 7  | 40  | nucleobase metabolic process                                                                |
| GO:0002636 | 0.005508484 | 2  | 3   | positive regulation of germinal center formation                                            |

|            |             |    |     |                                                                                          |
|------------|-------------|----|-----|------------------------------------------------------------------------------------------|
| GO:0060021 | 0.005600648 | 11 | 77  | palate development                                                                       |
| GO:0086073 | 0.005610127 | 3  | 6   | bundle of His cell-Purkinje myocyte adhesion involved in cell communication              |
| GO:0046033 | 0.005610641 | 4  | 15  | AMP metabolic process                                                                    |
| GO:1901630 | 0.005651733 | 2  | 3   | negative regulation of presynaptic membrane organization                                 |
| GO:0035655 | 0.005742708 | 2  | 3   | interleukin-18-mediated signaling pathway                                                |
| GO:0030185 | 0.005915195 | 2  | 3   | nitric oxide transport                                                                   |
| GO:0010226 | 0.005997206 | 5  | 23  | response to lithium ion                                                                  |
| GO:0035694 | 0.006163029 | 2  | 3   | mitochondrial protein catabolic process                                                  |
| GO:0045837 | 0.006179917 | 4  | 16  | negative regulation of membrane potential                                                |
| GO:0030397 | 0.006278785 | 8  | 46  | membrane disassembly                                                                     |
| GO:0015669 | 0.006538972 | 3  | 9   | gas transport                                                                            |
| GO:2000286 | 0.006574971 | 2  | 3   | receptor internalization involved in canonical Wnt signaling pathway                     |
| GO:0007163 | 0.006578631 | 16 | 138 | establishment or maintenance of cell polarity                                            |
| GO:0036302 | 0.006586321 | 3  | 7   | atrioventricular canal development                                                       |
| GO:0048844 | 0.006719602 | 8  | 48  | artery morphogenesis                                                                     |
| GO:2000648 | 0.006786575 | 9  | 59  | positive regulation of stem cell proliferation                                           |
| GO:0000186 | 0.006839995 | 7  | 38  | activation of MAPKK activity                                                             |
| GO:0043255 | 0.006971248 | 11 | 86  | regulation of carbohydrate biosynthetic process                                          |
| GO:0042045 | 0.007074114 | 3  | 8   | epithelial fluid transport                                                               |
| GO:0015701 | 0.007148941 | 7  | 41  | bicarbonate transport                                                                    |
| GO:1902992 | 0.007190118 | 3  | 7   | negative regulation of amyloid precursor protein catabolic process                       |
| GO:0071222 | 0.007285971 | 14 | 128 | cellular response to lipopolysaccharide                                                  |
| GO:0006024 | 0.00746955  | 13 | 109 | glycosaminoglycan biosynthetic process                                                   |
| GO:0003382 | 0.007506834 | 8  | 50  | epithelial cell morphogenesis                                                            |
| GO:2000169 | 0.007554472 | 3  | 7   | regulation of peptidyl-cysteine S-nitrosylation                                          |
| GO:1902110 | 0.007569453 | 3  | 9   | positive regulation of mitochondrial membrane permeability involved in apoptotic process |
| GO:0035434 | 0.007587222 | 2  | 3   | copper ion transmembrane transport                                                       |
| GO:0031098 | 0.007640421 | 10 | 76  | stress-activated protein kinase signaling cascade                                        |
| GO:0002638 | 0.007716163 | 3  | 8   | negative regulation of immunoglobulin production                                         |

|            |             |    |     |                                                                                                  |
|------------|-------------|----|-----|--------------------------------------------------------------------------------------------------|
| GO:0044321 | 0.007747651 | 4  | 16  | response to leptin                                                                               |
| GO:0038179 | 0.007771699 | 5  | 22  | neurotrophin signaling pathway                                                                   |
| GO:0048858 | 0.007857641 | 26 | 260 | cell projection morphogenesis                                                                    |
| GO:0097012 | 0.00801599  | 3  | 8   | response to granulocyte macrophage colony-stimulating factor                                     |
| GO:0002828 | 0.008264835 | 5  | 26  | regulation of type 2 immune response                                                             |
| GO:0051052 | 0.00827441  | 31 | 351 | regulation of DNA metabolic process                                                              |
| GO:0002467 | 0.008330621 | 3  | 8   | germinal center formation                                                                        |
| GO:0001508 | 0.008379269 | 10 | 68  | action potential                                                                                 |
| GO:0019827 | 0.008388996 | 15 | 132 | stem cell population maintenance                                                                 |
| GO:0031343 | 0.00842011  | 7  | 50  | positive regulation of cell killing                                                              |
| GO:0009791 | 0.008430219 | 10 | 70  | post-embryonic development                                                                       |
| GO:0097021 | 0.008474385 | 2  | 3   | lymphocyte migration into lymphoid organs                                                        |
| GO:0070208 | 0.008540098 | 4  | 15  | protein heterotrimerization                                                                      |
| GO:0090135 | 0.008726563 | 2  | 3   | actin filament branching                                                                         |
| GO:0043094 | 0.008744126 | 6  | 39  | cellular metabolic compound salvage                                                              |
| GO:1990785 | 0.009009295 | 2  | 3   | response to water-immersion restraint stress                                                     |
| GO:0019858 | 0.009076148 | 2  | 3   | cytosine metabolic process                                                                       |
| GO:0048839 | 0.009202015 | 7  | 45  | inner ear development                                                                            |
| GO:1900153 | 0.009246956 | 4  | 16  | positive regulation of nuclear-transcribed mRNA catabolic process, deadenylation-dependent decay |
| GO:0009267 | 0.009292778 | 17 | 165 | cellular response to starvation                                                                  |
| GO:0022405 | 0.009681696 | 9  | 64  | hair cycle process                                                                               |
| GO:0048011 | 0.009788155 | 4  | 16  | neurotrophin TRK receptor signaling pathway                                                      |
| GO:0097581 | 0.009890422 | 7  | 41  | lamellipodium organization                                                                       |

**Table S33. PSGs identified on branch 4 of frog.**

| <b>Ensembl Prot ID</b> | <b>Ensembl Gene ID</b> | <b>Ensembl Trans ID</b> | <b>HNGC Name</b> |
|------------------------|------------------------|-------------------------|------------------|
| ENSACAP00000011153     | ENSACAG00000011291     | ENSACAT00000011385      | TPX2             |
| ENSACAP00000010147     | ENSACAG00000010046     | ENSACAT00000010357      | ACTN4            |

|                     |                     |                     |         |
|---------------------|---------------------|---------------------|---------|
| ENSACAP00000008070  | ENSACAG00000008152  | ENSACAT00000008242  | CDH6    |
| ENSACAP00000001268  | ENSACAG00000001379  | ENSACAT00000001301  | FICD    |
| ENSACAP000000015880 | ENSACAG000000016135 | ENSACAT000000016198 | ENTPD2  |
| ENSACAP00000004466  | ENSACAG00000004565  | ENSACAT00000004567  |         |
| ENSACAP00000003231  | ENSACAG00000003255  | ENSACAT00000003314  |         |
| ENSACAP00000009624  | ENSACAG00000009754  | ENSACAT00000009821  | ANXA4   |
| ENSACAP00000009687  | ENSACAG00000009844  | ENSACAT00000009884  | ZWILCH  |
| ENSACAP00000005716  | ENSACAG00000005606  | ENSACAT00000005841  | HK2     |
| ENSACAP00000008525  | ENSACAG00000008687  | ENSACAT00000008708  | BRAT1   |
| ENSACAP00000005206  | ENSACAG00000005327  | ENSACAT00000005323  | SRSF10  |
| ENSACAP00000005936  | ENSACAG00000006034  | ENSACAT00000006069  | N4BP1   |
| ENSACAP00000000379  | ENSACAG00000000471  | ENSACAT00000000394  | CH25H   |
| ENSACAP00000022629  | ENSACAG000000229096 | ENSACAT00000030046  | FTCDNL1 |
| ENSACAP00000010343  | ENSACAG00000010493  | ENSACAT00000010557  | HERC4   |
| ENSACAP00000003601  | ENSACAG00000003709  | ENSACAT00000003689  | FADD    |
| ENSACAP00000006257  | ENSACAG00000006391  | ENSACAT00000006396  |         |
| ENSACAP00000003660  | ENSACAG00000003679  | ENSACAT00000003750  | PACS1   |
| ENSACAP00000001664  | ENSACAG00000001777  | ENSACAT00000001703  | NDUFB3  |
| ENSACAP00000000825  | ENSACAG00000000812  | ENSACAT00000000851  | IGHM    |
| ENSACAP00000018161  | ENSACAG00000024548  | ENSACAT00000022331  |         |
| ENSACAP00000009092  | ENSACAG00000009253  | ENSACAT00000009285  | SLC1A3  |
| ENSACAP00000004015  | ENSACAG00000004079  | ENSACAT00000004107  | RELB    |
| ENSACAP00000004078  | ENSACAG00000004072  | ENSACAT00000004172  | HSPA5   |
| ENSACAP00000023366  | ENSACAG00000028384  | ENSACAT00000030786  | CAPSL   |
| ENSACAP00000017054  | ENSACAG00000017314  | ENSACAT00000017389  | SLC17A7 |
| ENSACAP00000010744  | ENSACAG00000010772  | ENSACAT00000010966  |         |
| ENSACAP00000007747  | ENSACAG00000007863  | ENSACAT00000007913  |         |
| ENSACAP00000007352  | ENSACAG00000007262  | ENSACAT00000007508  |         |
| ENSACAP00000011083  | ENSACAG00000011313  | ENSACAT00000011312  |         |
| ENSACAP00000001332  | ENSACAG00000001111  | ENSACAT00000001365  | GPI     |



|                    |                    |                    |           |
|--------------------|--------------------|--------------------|-----------|
| ENSACAP0000001155  | ENSACAG0000001070  | ENSACAT0000001188  | CADM1     |
| ENSACAP00000016988 | ENSACAG00000017266 | ENSACAT00000017323 |           |
| ENSACAP00000011446 | ENSACAG00000011631 | ENSACAT00000011685 | REXO2     |
| ENSACAP00000006180 | ENSACAG00000006198 | ENSACAT00000006317 | BTAF1     |
| ENSACAP00000003664 | ENSACAG00000003722 | ENSACAT00000003754 |           |
| ENSACAP00000002914 | ENSACAG00000002921 | ENSACAT00000002988 | TOX4      |
| ENSACAP00000016346 | ENSACAG00000016627 | ENSACAT00000016670 | R3HCC1    |
| ENSACAP00000001760 | ENSACAG00000001775 | ENSACAT00000001801 |           |
| ENSACAP00000017058 | ENSACAG00000017331 | ENSACAT00000017393 | DDAH2     |
| ENSACAP00000002190 | ENSACAG00000002120 | ENSACAT00000002250 | EIF4G1    |
| ENSACAP00000004787 | ENSACAG00000004921 | ENSACAT00000004895 | ABRACL    |
| ENSACAP00000001609 | ENSACAG00000001350 | ENSACAT00000001648 | ECE2      |
| ENSACAP00000009086 | ENSACAG00000009224 | ENSACAT00000009279 | XPNPEP2   |
| ENSACAP00000009821 | ENSACAG00000010023 | ENSACAT00000010021 | CFAP53    |
| ENSACAP00000008669 | ENSACAG00000008711 | ENSACAT00000008854 | LOXL3     |
| ENSACAP00000012879 | ENSACAG00000013111 | ENSACAT00000013136 | YJEFN3    |
| ENSACAP00000004168 | ENSACAG00000004303 | ENSACAT00000004267 | ANKRD53   |
| ENSACAP00000012425 | ENSACAG00000012604 | ENSACAT00000012678 | HSF1      |
| ENSACAP00000002276 | ENSACAG00000002387 | ENSACAT00000002336 | NUDT7     |
| ENSACAP00000005916 | ENSACAG00000005991 | ENSACAT00000006048 | DNAI1     |
| ENSACAP00000005436 | ENSACAG00000005574 | ENSACAT00000005554 | HS3ST1    |
| ENSACAP00000004636 | ENSACAG00000004724 | ENSACAT00000004742 | DNAJA3    |
| ENSACAP00000000221 | ENSACAG00000000233 | ENSACAT00000000226 | RAB11FIP1 |
| ENSACAP00000017382 | ENSACAG00000017650 | ENSACAT00000017723 | PRPF4B    |
| ENSACAP00000007082 | ENSACAG00000007230 | ENSACAT00000007235 |           |
| ENSACAP00000010464 | ENSACAG00000010658 | ENSACAT00000010680 | HBM       |
| ENSACAP00000010527 | ENSACAG00000010719 | ENSACAT00000010744 | MPG       |
| ENSACAP00000003403 | ENSACAG00000003497 | ENSACAT00000003486 | TERF2     |
| ENSACAP00000021909 | ENSACAG00000028799 | ENSACAT00000029327 | C1orf52   |
| ENSACAP00000015147 | ENSACAG00000015409 | ENSACAT00000015453 |           |

|                    |                    |                    |          |
|--------------------|--------------------|--------------------|----------|
| ENSACAP00000018247 | ENSACAG00000022510 | ENSACAT00000022382 | DLAT     |
| ENSACAP00000003069 | ENSACAG00000003166 | ENSACAT00000003147 | BNIP2    |
| ENSACAP00000017496 | ENSACAG00000017773 | ENSACAT00000017841 | SH3BGRL3 |
| ENSACAP00000015109 | ENSACAG00000015385 | ENSACAT00000015414 | HERC1    |
| ENSACAP00000011007 | ENSACAG00000011206 | ENSACAT00000011235 | STARD5   |
| ENSACAP00000009892 | ENSACAG00000010041 | ENSACAT00000010095 | SMTN     |
| ENSACAP00000009973 | ENSACAG00000010115 | ENSACAT00000010178 | INPP5J   |
| ENSACAP00000012760 | ENSACAG00000012995 | ENSACAT00000013016 | PTGR1    |
| ENSACAP00000004467 | ENSACAG00000004556 | ENSACAT00000004568 | EEF1A1   |
| ENSACAP00000012511 | ENSACAG00000012620 | ENSACAT00000012767 | PLAT     |
| ENSACAP00000007066 | ENSACAG00000007212 | ENSACAT00000007218 | CD276    |
| ENSACAP00000014677 | ENSACAG00000014806 | ENSACAT00000014975 |          |
| ENSACAP00000004160 | ENSACAG00000004179 | ENSACAT00000004259 | PTDSS1   |
| ENSACAP00000010338 | ENSACAG00000010516 | ENSACAT00000010551 | CALB1    |
| ENSACAP00000021793 | ENSACAG00000028464 | ENSACAT00000029213 | RALYL    |
| ENSACAP00000016677 | ENSACAG00000016952 | ENSACAT00000017007 | HSD11B1L |
| ENSACAP00000014073 | ENSACAG00000014323 | ENSACAT00000014361 | PLP1     |
| ENSACAP00000000416 | ENSACAG00000000308 | ENSACAT00000000433 | IDUA     |
| ENSACAP00000004226 | ENSACAG00000004364 | ENSACAT00000004325 | TFAM     |
| ENSACAP00000011628 | ENSACAG00000011894 | ENSACAT00000011868 | ZCCHC7   |
| ENSACAP00000006716 | ENSACAG00000006626 | ENSACAT00000006862 |          |
| ENSACAP00000011696 | ENSACAG00000011898 | ENSACAT00000011937 | GRHPR    |
| ENSACAP00000003905 | ENSACAG00000003984 | ENSACAT00000003997 | B4GALT3  |
| ENSACAP00000002101 | ENSACAG00000002223 | ENSACAT00000002158 | CHST9    |
| ENSACAP00000015123 | ENSACAG00000015382 | ENSACAT00000015429 | TMED2    |
| ENSACAP00000015149 | ENSACAG00000015423 | ENSACAT00000015455 | RILPL2   |
| ENSACAP00000001682 | ENSACAG00000001663 | ENSACAT00000001722 | IMPACT   |
| ENSACAP00000008830 | ENSACAG00000008935 | ENSACAT00000009020 | VCL      |
| ENSACAP00000001092 | ENSACAG00000000304 | ENSACAT00000001122 | LAMA3    |
| ENSACAP00000017354 | ENSACAG00000017628 | ENSACAT00000017695 | DNAJC8   |

|                    |                    |                    |          |
|--------------------|--------------------|--------------------|----------|
| ENSACAP00000023204 | ENSACAG00000029360 | ENSACAT00000030624 |          |
| ENSACAP00000000255 | ENSACAG00000000201 | ENSACAT00000000261 | NPC1     |
| ENSACAP00000003389 | ENSACAG00000003453 | ENSACAT00000003472 | AK2      |
| ENSACAP00000017751 | ENSACAG00000021101 | ENSACAT00000021162 |          |
| ENSACAP00000015757 | ENSACAG00000016016 | ENSACAT00000016073 | GPN3     |
| ENSACAP00000007131 | ENSACAG00000007245 | ENSACAT00000007286 | SHARPIN  |
| ENSACAP00000009761 | ENSACAG00000009859 | ENSACAT00000009960 | OXSRI    |
| ENSACAP00000003323 | ENSACAG00000003408 | ENSACAT00000003406 | SPINT1   |
| ENSACAP00000004798 | ENSACAG00000004884 | ENSACAT00000004906 | HSPA8    |
| ENSACAP00000000360 | ENSACAG00000000388 | ENSACAT00000000374 | RASSF8   |
| ENSACAP00000002102 | ENSACAG00000002133 | ENSACAT00000002159 | POLA2    |
| ENSACAP00000000796 | ENSACAG00000000861 | ENSACAT00000000822 | ACAD8    |
| ENSACAP00000006621 | ENSACAG00000006760 | ENSACAT00000006767 | HHATL    |
| ENSACAP00000012150 | ENSACAG00000012394 | ENSACAT00000012396 | MAP6     |
| ENSACAP00000007627 | ENSACAG00000007724 | ENSACAT00000007789 | EIF2D    |
| ENSACAP00000009969 | ENSACAG00000010176 | ENSACAT00000010174 | HIRIP3   |
| ENSACAP00000016369 | ENSACAG00000016579 | ENSACAT00000016693 | CAPN1    |
| ENSACAP00000008681 | ENSACAG00000008859 | ENSACAT00000008867 | CENPN    |
| ENSACAP00000002742 | ENSACAG00000002493 | ENSACAT00000002811 | DIP2C    |
| ENSACAP00000000391 | ENSACAG00000000286 | ENSACAT00000000408 | MAP2K2   |
| ENSACAP00000021641 | ENSACAG00000004214 | ENSACAT00000022236 | MIS18BP1 |
| ENSACAP00000009827 | ENSACAG00000009919 | ENSACAT00000010027 | ERCC3    |
| ENSACAP00000009562 | ENSACAG00000009597 | ENSACAT00000009759 | XRCC5    |
| ENSACAP00000008841 | ENSACAG00000009052 | ENSACAT00000009032 | COMMD3   |
| ENSACAP00000004238 | ENSACAG00000004336 | ENSACAT00000004337 | ANP32B   |
| ENSACAP00000017703 | ENSACAG00000017980 | ENSACAT00000018051 |          |
| ENSACAP00000009165 | ENSACAG00000009328 | ENSACAT00000009358 | PLXDC2   |
| ENSACAP00000016340 | ENSACAG00000016491 | ENSACAT00000016664 | ITGA8    |
| ENSACAP00000000934 | ENSACAG00000000955 | ENSACAT00000000962 | QSOX1    |
| ENSACAP00000015246 | ENSACAG00000015491 | ENSACAT00000015555 | PRDX6    |

|                     |                     |                     |           |
|---------------------|---------------------|---------------------|-----------|
| ENSACAP00000003974  | ENSACAG00000004063  | ENSACAT00000004066  | CCDC39    |
| ENSACAP00000002866  | ENSACAG00000002729  | ENSACAT00000002937  | FBXO18    |
| ENSACAP00000001231  | ENSACAG00000001263  | ENSACAT00000001264  | NDUFB6    |
| ENSACAP00000001455  | ENSACAG00000001457  | ENSACAT00000001490  | MDH2      |
| ENSACAP00000000583  | ENSACAG00000000531  | ENSACAT00000000602  | SEPT12    |
| ENSACAP00000005208  | ENSACAG00000005306  | ENSACAT00000005325  | EXD2      |
| ENSACAP000000016067 | ENSACAG000000016360 | ENSACAT000000016387 | MYADM     |
| ENSACAP000000016228 | ENSACAG000000016368 | ENSACAT000000016551 | PRKCG     |
| ENSACAP00000000378  | ENSACAG00000000366  | ENSACAT00000000393  | TNFAIP2   |
| ENSACAP000000015188 | ENSACAG000000015463 | ENSACAT000000015495 | TACO1     |
| ENSACAP000000013343 | ENSACAG000000013301 | ENSACAT000000013614 | COL1A2    |
| ENSACAP000000012746 | ENSACAG000000012993 | ENSACAT000000013002 | METTLL11B |
| ENSACAP000000004955 | ENSACAG000000005022 | ENSACAT000000005068 |           |
| ENSACAP000000002155 | ENSACAG000000002257 | ENSACAT000000002214 | SERPIND1  |
| ENSACAP000000001643 | ENSACAG000000001743 | ENSACAT000000001682 | UBE2L3    |
| ENSACAP000000015381 | ENSACAG000000015636 | ENSACAT000000015694 | ISOC2     |
| ENSACAP000000012089 | ENSACAG000000012271 | ENSACAT000000012334 |           |
| ENSACAP000000015849 | ENSACAG000000016130 | ENSACAT000000016166 | LENG1     |
| ENSACAP000000000034 | ENSACAG000000000035 | ENSACAT000000000035 | SLC6A13   |
| ENSACAP000000003355 | ENSACAG000000003341 | ENSACAT000000003438 | COPB2     |
| ENSACAP000000023146 | ENSACAG000000028553 | ENSACAT000000030566 | C12orf45  |
| ENSACAP000000001757 | ENSACAG000000001800 | ENSACAT000000001798 |           |
| ENSACAP000000007935 | ENSACAG000000008070 | ENSACAT000000008103 | GTPBP1    |
| ENSACAP000000022437 | ENSACAG000000029148 | ENSACAT000000029854 | CHMP5     |
| ENSACAP000000006319 | ENSACAG000000006450 | ENSACAT000000006460 | EFHD1     |
| ENSACAP000000006737 | ENSACAG000000006854 | ENSACAT000000006883 | C8A       |
| ENSACAP000000000160 | ENSACAG000000000146 | ENSACAT000000000163 | PCSK9     |
| ENSACAP000000002239 | ENSACAG000000002353 | ENSACAT000000002299 |           |
| ENSACAP000000022313 | ENSACAG000000029391 | ENSACAT000000029730 | AREG      |
| ENSACAP000000011712 | ENSACAG000000011773 | ENSACAT000000011954 |           |

|                     |                     |                     |          |
|---------------------|---------------------|---------------------|----------|
| ENSACAP00000011987  | ENSACAG00000012027  | ENSACAT00000012231  | AHCYL1   |
| ENSACAP00000013915  | ENSACAG00000013535  | ENSACAT00000014201  | PTPRF    |
| ENSACAP00000012754  | ENSACAG00000012989  | ENSACAT00000013010  | RDM1     |
| ENSACAP00000023038  | ENSACAG00000028642  | ENSACAT00000030458  | CCDC24   |
| ENSACAP00000014417  | ENSACAG00000014707  | ENSACAT00000014712  | CCDC59   |
| ENSACAP00000015276  | ENSACAG00000015495  | ENSACAT00000015585  | EIF2B3   |
| ENSACAP00000015527  | ENSACAG00000015761  | ENSACAT00000015841  | PDCD4    |
| ENSACAP00000015446  | ENSACAG00000015732  | ENSACAT00000015760  | TMEM69   |
| ENSACAP00000013736  | ENSACAG00000014001  | ENSACAT00000014017  | PAWR     |
| ENSACAP00000001347  | ENSACAG00000001348  | ENSACAT00000001380  | SPOCK2   |
| ENSACAP00000000791  | ENSACAG00000000862  | ENSACAT00000000816  | MCU      |
| ENSACAP000000017283 | ENSACAG000000017561 | ENSACAT000000017623 | NEUROD2  |
| ENSACAP000000022284 | ENSACAG000000028720 | ENSACAT000000029701 |          |
| ENSACAP000000002985 | ENSACAG000000003079 | ENSACAT000000003062 | BYSL     |
| ENSACAP000000017662 | ENSACAG000000017936 | ENSACAT000000018008 | ATP6V0A1 |
| ENSACAP00000000684  | ENSACAG00000000574  | ENSACAT00000000706  | MON2     |
| ENSACAP000000002037 | ENSACAG000000002035 | ENSACAT000000002086 | UCHL3    |
| ENSACAP000000005089 | ENSACAG000000005218 | ENSACAT000000005204 |          |
| ENSACAP000000007005 | ENSACAG000000007124 | ENSACAT000000007156 | TSPAN12  |
| ENSACAP000000002567 | ENSACAG000000002604 | ENSACAT000000002632 | EFNB2    |
| ENSACAP000000000241 | ENSACAG000000000264 | ENSACAT000000000247 | LAMP1    |
| ENSACAP000000003806 | ENSACAG000000003847 | ENSACAT000000003898 | SYT2     |
| ENSACAP000000013672 | ENSACAG000000013921 | ENSACAT000000013953 | NOSIP    |
| ENSACAP000000005126 | ENSACAG000000005107 | ENSACAT000000005242 | KDM5B    |
| ENSACAP000000011883 | ENSACAG000000012036 | ENSACAT000000012127 | UBE3A    |
| ENSACAP000000015430 | ENSACAG000000015683 | ENSACAT000000015743 | NUP50    |
| ENSACAP000000012342 | ENSACAG000000012584 | ENSACAT000000012595 | CXorf23  |
| ENSACAP000000016592 | ENSACAG000000016869 | ENSACAT000000016918 | SERINC3  |
| ENSACAP000000007057 | ENSACAG000000007218 | ENSACAT000000007209 | NR0B1    |
| ENSACAP000000019214 | ENSACAG000000014537 | ENSACAT000000014541 | MID1IP1  |

|                    |                    |                    |         |
|--------------------|--------------------|--------------------|---------|
| ENSACAP00000015734 | ENSACAG00000015951 | ENSACAT00000016050 | CSE1L   |
| ENSACAP00000017656 | ENSACAG00000017928 | ENSACAT00000018002 |         |
| ENSACAP00000017584 | ENSACAG00000017858 | ENSACAT00000017930 |         |
| ENSACAP00000006746 | ENSACAG00000006896 | ENSACAT00000006892 | RELN    |
| ENSACAP00000014830 | ENSACAG00000015115 | ENSACAT00000015131 | GPR22   |
| ENSACAP00000001856 | ENSACAG00000001784 | ENSACAT00000001901 | CCT8    |
| ENSACAP00000008692 | ENSACAG00000008845 | ENSACAT00000008878 | LONRF1  |
| ENSACAP00000013738 | ENSACAG00000013950 | ENSACAT00000014019 |         |
| ENSACAP00000011523 | ENSACAG00000011687 | ENSACAT00000011763 | ABI3BP  |
| ENSACAP00000011059 | ENSACAG00000011149 | ENSACAT00000011288 | TBC1D23 |
| ENSACAP00000005027 | ENSACAG00000005144 | ENSACAT00000005140 | MARCH1  |
| ENSACAP00000015416 | ENSACAG00000015674 | ENSACAT00000015729 | FGB     |
| ENSACAP00000017757 | ENSACAG00000021135 | ENSACAT00000021129 |         |
| ENSACAP00000002763 | ENSACAG00000002772 | ENSACAT00000002832 | GATB    |
| ENSACAP00000001606 | ENSACAG00000001683 | ENSACAT00000001645 | CENPJ   |
| ENSACAP00000012693 | ENSACAG00000012765 | ENSACAT00000012949 | ANXA5   |
| ENSACAP00000012369 | ENSACAG00000012632 | ENSACAT00000012622 |         |
| ENSACAP00000012644 | ENSACAG00000012875 | ENSACAT00000012900 | CASP6   |
| ENSACAP00000012209 | ENSACAG00000012255 | ENSACAT00000012459 | SEPT11  |
| ENSACAP00000021261 | ENSACAG00000027099 | ENSACAT00000022125 | CCDC89  |
| ENSACAP00000013095 | ENSACAG00000013283 | ENSACAT00000013355 | GC      |
| ENSACAP00000017717 | ENSACAG00000017990 | ENSACAT00000018065 | ACAA2   |
| ENSACAP00000011045 | ENSACAG00000011296 | ENSACAT00000011273 | EMB     |
| ENSACAP00000001594 | ENSACAG00000001614 | ENSACAT00000001633 | SLC27A6 |
| ENSACAP00000000932 | ENSACAG00000000922 | ENSACAT00000000960 | ROR2    |
| ENSACAP00000000778 | ENSACAG00000000768 | ENSACAT00000000802 | SYK     |
| ENSACAP00000013128 | ENSACAG00000013328 | ENSACAT00000013388 |         |
| ENSACAP00000003019 | ENSACAG00000003015 | ENSACAT00000003096 | VLDLR   |
| ENSACAP00000001893 | ENSACAG00000001929 | ENSACAT00000001939 |         |
| ENSACAP00000010618 | ENSACAG00000010781 | ENSACAT00000010837 | HAUS6   |

|                    |                    |                    |         |
|--------------------|--------------------|--------------------|---------|
| ENSACAP00000010758 | ENSACAG00000010932 | ENSACAT00000010981 | CFP     |
| ENSACAP00000004589 | ENSACAG00000004710 | ENSACAT00000004695 |         |
| ENSACAP00000005087 | ENSACAG00000005069 | ENSACAT00000005202 | CDK16   |
| ENSACAP00000015316 | ENSACAG00000015591 | ENSACAT00000015628 | CLPP    |
| ENSACAP00000022652 | ENSACAG00000015935 | ENSACAT00000030069 | SPRED1  |
| ENSACAP00000015705 | ENSACAG00000015966 | ENSACAT00000016020 | KRI1    |
| ENSACAP00000014848 | ENSACAG00000015126 | ENSACAT00000015149 |         |
| ENSACAP00000017274 | ENSACAG00000017477 | ENSACAT00000017614 |         |
| ENSACAP00000020710 | ENSACAG00000016156 | ENSACAT00000022687 | PAPLN   |
| ENSACAP00000003757 | ENSACAG00000003860 | ENSACAT00000003849 | ZNF408  |
| ENSACAP00000012329 | ENSACAG00000012437 | ENSACAT00000012582 | G6PD    |
| ENSACAP00000016757 | ENSACAG00000016987 | ENSACAT00000017087 |         |
| ENSACAP00000005047 | ENSACAG00000005179 | ENSACAT00000005160 | COMMD9  |
| ENSACAP00000004222 | ENSACAG00000004323 | ENSACAT00000004321 | CD44    |
| ENSACAP00000001943 | ENSACAG00000002019 | ENSACAT00000001989 | ARL14EP |
| ENSACAP00000002708 | ENSACAG00000002746 | ENSACAT00000002776 | TCP11L1 |
| ENSACAP00000002921 | ENSACAG00000002823 | ENSACAT00000002995 | CSTF3   |
| ENSACAP00000009232 | ENSACAG00000009338 | ENSACAT00000009425 | ZNF143  |
| ENSACAP00000000054 | ENSACAG00000000055 | ENSACAT00000000055 | KCNC1   |
| ENSACAP00000021933 | ENSACAG00000029485 | ENSACAT00000029351 |         |
| ENSACAP00000002650 | ENSACAG00000002763 | ENSACAT00000002717 | TSSC4   |
| ENSACAP00000009585 | ENSACAG00000009745 | ENSACAT00000009782 | TOLLIP  |
| ENSACAP00000015070 | ENSACAG00000015332 | ENSACAT00000015374 | RPLP2   |
| ENSACAP00000016669 | ENSACAG00000016849 | ENSACAT00000016998 | PKN1    |
| ENSACAP00000014952 | ENSACAG00000015157 | ENSACAT00000015255 | EPS8L2  |
| ENSACAP00000009556 | ENSACAG00000009769 | ENSACAT00000009753 |         |
| ENSACAP00000017391 | ENSACAG00000017579 | ENSACAT00000017732 | MYH10   |
| ENSACAP00000010265 | ENSACAG00000010273 | ENSACAT00000010477 | COL18A1 |
| ENSACAP00000010053 | ENSACAG00000010217 | ENSACAT00000010260 | NDUFV1  |
| ENSACAP00000007659 | ENSACAG00000007694 | ENSACAT00000007823 | ACOX1   |

|                    |                    |                    |          |
|--------------------|--------------------|--------------------|----------|
| ENSACAP0000005899  | ENSACAG0000006044  | ENSACAT0000006028  | ICT1     |
| ENSACAP0000001589  | ENSACAG0000001698  | ENSACAT0000001627  | TOB1     |
| ENSACAP00000010615 | ENSACAG00000010832 | ENSACAT00000010834 | ADGRE5   |
| ENSACAP00000016681 | ENSACAG00000016934 | ENSACAT00000017011 | BZW1     |
| ENSACAP0000006604  | ENSACAG0000006747  | ENSACAT0000006750  | TMEFF2   |
| ENSACAP00000010279 | ENSACAG00000010432 | ENSACAT00000010491 |          |
| ENSACAP0000004762  | ENSACAG0000004847  | ENSACAT0000004870  |          |
| ENSACAP0000004705  | ENSACAG0000004735  | ENSACAT0000004812  | COL6A1   |
| ENSACAP00000016251 | ENSACAG00000016533 | ENSACAT00000016574 | NHLRC3   |
| ENSACAP00000013296 | ENSACAG00000013523 | ENSACAT00000013565 | MRPL19   |
| ENSACAP00000011364 | ENSACAG00000011587 | ENSACAT00000011603 | UBXN2A   |
| ENSACAP00000012470 | ENSACAG00000012600 | ENSACAT00000012726 | ODC1     |
| ENSACAP0000008985  | ENSACAG0000009170  | ENSACAT0000009178  | OGN      |
| ENSACAP00000023237 | ENSACAG0000005667  | ENSACAT00000030656 | MYT1L    |
| ENSACAP0000006425  | ENSACAG0000005967  | ENSACAT0000006570  |          |
| ENSACAP00000010793 | ENSACAG00000010885 | ENSACAT00000011016 | TKT      |
| ENSACAP00000017438 | ENSACAG00000017700 | ENSACAT00000017780 | FAM184A  |
| ENSACAP0000006046  | ENSACAG0000006164  | ENSACAT0000006180  | CEP57L1  |
| ENSACAP0000005515  | ENSACAG0000005657  | ENSACAT0000005636  | TRNT1    |
| ENSACAP00000014754 | ENSACAG00000015012 | ENSACAT00000015055 | ANO10    |
| ENSACAP0000003229  | ENSACAG0000003319  | ENSACAT0000003312  | PACRG    |
| ENSACAP00000011394 | ENSACAG00000011208 | ENSACAT00000011633 |          |
| ENSACAP00000002257 | ENSACAG00000002344 | ENSACAT00000002317 | GPR137B  |
| ENSACAP00000001580 | ENSACAG00000001633 | ENSACAT00000001618 | B3GALNT2 |
| ENSACAP00000009073 | ENSACAG00000009007 | ENSACAT00000009266 | LTBP1    |
| ENSACAP00000001253 | ENSACAG00000001139 | ENSACAT00000001286 | PRKD3    |
| ENSACAP00000023397 | ENSACAG00000029073 | ENSACAT00000030817 | LYPLAL1  |
| ENSACAP00000002332 | ENSACAG00000002384 | ENSACAT00000002392 | BROX     |

---



**Table S34. GO terms associated with PSGs identified on frog branch 4.**

| category   | pvalue      | numDE<br>InCat | numIn<br>Cat | term                                                             | GeneName                                                                                                                      |
|------------|-------------|----------------|--------------|------------------------------------------------------------------|-------------------------------------------------------------------------------------------------------------------------------|
| GO:0036462 | 0.000111602 | 2              | 2            | TRAIL-activated apoptotic signaling pathway                      | FADD,ENSACAG00000029485,                                                                                                      |
| GO:0071470 | 0.000147044 | 4              | 20           | cellular response to osmotic stress                              | ENSACAG00000017928,RELB,OXSR1,X<br>RCC5,                                                                                      |
| GO:0035795 | 0.000274784 | 2              | 2            | negative regulation of mitochondrial membrane permeability       | ACAA2,HK2,                                                                                                                    |
| GO:1904430 | 0.00029842  | 2              | 2            | negative regulation of t-circle formation                        | TERF2,XRCC5,                                                                                                                  |
| GO:0006081 | 0.001064851 | 5              | 55           | cellular aldehyde metabolic process                              | G6PD,TKT,GPI,DLAT,GRHPR,                                                                                                      |
| GO:0006957 | 0.001105394 | 3              | 14           | complement activation, alternative pathway                       | C8A,CFP,ENSACAG00000011208,                                                                                                   |
| GO:0038026 | 0.001209879 | 2              | 3            | reelin-mediated signaling pathway                                | RELN,VLDLR,                                                                                                                   |
| GO:0046184 | 0.001257641 | 2              | 4            | aldehyde biosynthetic process                                    | TKT,GPI,                                                                                                                      |
| GO:0001945 | 0.001288649 | 2              | 4            | lymph vessel development                                         | EFNB2,SYK,                                                                                                                    |
| GO:0006006 | 0.001696709 | 6              | 84           | glucose metabolic process                                        | G6PD,GPI,DLAT,ENSACAG0000000325<br>5,HK2,BRAT1,                                                                               |
| GO:0060236 | 0.001864445 | 3              | 16           | regulation of mitotic spindle organization                       | TPX2,CHMP5,ANKRD53,                                                                                                           |
| GO:0033555 | 0.002850564 | 4              | 43           | multicellular organismal response to stress                      | PRKCG,NEUROD2,RELN,EIF4G1,                                                                                                    |
| GO:0050999 | 0.003771516 | 3              | 22           | regulation of nitric-oxide synthase activity                     | NOSIP,DDAH2,TERF2,                                                                                                            |
| GO:0006970 | 0.004009937 | 4              | 45           | response to osmotic stress                                       | ENSACAG00000017928,RELB,OXSR1,X<br>RCC5,                                                                                      |
| GO:0031175 | 0.0043879   | 7              | 137          | neuron projection development                                    | EFHD1,AREG,PTPRF,RELN,CDK16,HE<br>RC1,PLP1,                                                                                   |
| GO:1902857 | 0.004948652 | 2              | 7            | positive regulation of nonmotile primary cilium assembly         | SEPT12,CENPJ,                                                                                                                 |
| GO:0042129 | 0.006033309 | 5              | 85           | regulation of T cell proliferation                               | FADD,PAWR,SYK,DNAJA3,CD276,                                                                                                   |
| GO:0045087 | 0.00606838  | 11             | 316          | innate immune response                                           | FADD,C8A,SERINC3,ENSACAG0000001<br>7928,ENSACAG00000021135,SYK,CFP,T<br>OLLIP,RELB,ENSACAG00000011208,EN<br>SACAG00000007262, |
| GO:0006090 | 0.007123617 | 4              | 50           | pyruvate metabolic process                                       | GPI,DLAT,ENSACAG00000003255,HK2,                                                                                              |
| GO:0097049 | 0.007383836 | 1              | 1            | motor neuron apoptotic process                                   | FADD,                                                                                                                         |
| GO:2000454 | 0.007383836 | 1              | 1            | positive regulation of CD8-positive, alpha-beta cytotoxic T cell | FADD,                                                                                                                         |

|            |             |    |     |                                                                                        |                                                                                                    |
|------------|-------------|----|-----|----------------------------------------------------------------------------------------|----------------------------------------------------------------------------------------------------|
|            |             |    |     | extravasation                                                                          |                                                                                                    |
| GO:0021517 | 0.008225599 | 2  | 8   | ventral spinal cord development                                                        | RELN,VLDLR,                                                                                        |
| GO:0046034 | 0.008958334 | 4  | 63  | ATP metabolic process                                                                  | ATP6V0A1,HSPA5,AK2,ENSACAG00000021101,                                                             |
| GO:0035562 | 0.00921317  | 2  | 9   | negative regulation of chromatin binding                                               | FBXO18,BTAF1,                                                                                      |
| GO:0060598 | 0.009435699 | 1  | 1   | dichotomous subdivision of terminal units involved in mammary gland duct morphogenesis | AREG,                                                                                              |
| GO:0032787 | 0.009538867 | 13 | 417 | monocarboxylic acid metabolic process                                                  | ACAA2,SLC27A6,ACOX1,ENSACAG0000004847,GPI,DLAT,ENSACAG00000003255,PLP1,IDUA,GRHPR,NPC1,ACAD8, HK2, |
| GO:0048265 | 0.010396075 | 2  | 11  | response to pain                                                                       | PRKCG,RELN,                                                                                        |
| GO:0046487 | 0.010592178 | 2  | 11  | glyoxylate metabolic process                                                           | DLAT,GRHPR,                                                                                        |
| GO:0033869 | 0.011169222 | 1  | 1   | nucleoside bisphosphate catabolic process                                              | NUDT7,                                                                                             |
| GO:0034034 | 0.011169222 | 1  | 1   | purine nucleoside bisphosphate catabolic process                                       | NUDT7,                                                                                             |
| GO:0046356 | 0.011169222 | 1  | 1   | acetyl-CoA catabolic process                                                           | NUDT7,                                                                                             |
| GO:0021680 | 0.011623862 | 2  | 11  | cerebellar Purkinje cell layer development                                             | MYH10,HSPA5,                                                                                       |
| GO:0072027 | 0.011896872 | 1  | 1   | connecting tubule development                                                          | CALB1,                                                                                             |
| GO:0072286 | 0.011896872 | 1  | 1   | metanephric connecting tubule development                                              | CALB1,                                                                                             |
| GO:0006480 | 0.012660835 | 1  | 1   | N-terminal protein amino acid methylation                                              | METTL11B,                                                                                          |
| GO:0006924 | 0.013094653 | 1  | 1   | activation-induced cell death of T cells                                               | DNAJA3,                                                                                            |
| GO:0072755 | 0.013281179 | 1  | 1   | cellular response to benomyl                                                           | IMPACT,                                                                                            |
| GO:1901561 | 0.013281179 | 1  | 1   | response to benomyl                                                                    | IMPACT,                                                                                            |
| GO:1903849 | 0.013859234 | 1  | 1   | positive regulation of aorta morphogenesis                                             | EFNB2,                                                                                             |
| GO:0035786 | 0.014007207 | 1  | 1   | protein complex oligomerization                                                        | MCU,                                                                                               |
| GO:0010035 | 0.014271971 | 10 | 299 | response to inorganic substance                                                        | AREG,AHCYL1,NEUROD2,SYK,KCNC1 ,COL18A1,GPI,ENSACAG00000017266,IMPACT,NPC1,                         |
| GO:0048857 | 0.014548543 | 3  | 37  | neural nucleus development                                                             | KCNC1,HSPA5,PLP1,                                                                                  |
| GO:0061620 | 0.014932553 | 2  | 12  | glycolytic process through glucose-6-phosphate                                         | GPI,HK2,                                                                                           |
| GO:0051346 | 0.015290738 | 7  | 179 | negative regulation of hydrolase activity                                              | SPOCK2,ENSACAG00000017928,SPRED                                                                    |

|            |             |   |     |                                                                              |                                   |
|------------|-------------|---|-----|------------------------------------------------------------------------------|-----------------------------------|
| GO:0061300 | 0.015404067 | 1 | 2   | cerebellum vasculature development                                           | 1,GPI,TERF2,FICD,TMED2,           |
| GO:0001680 | 0.015516298 | 1 | 1   | tRNA 3'-terminal CCA addition                                                | ENSACAG00000005218,               |
| GO:0051156 | 0.015814385 | 2 | 14  | glucose 6-phosphate metabolic process                                        | TRNT1,                            |
| GO:0018117 | 0.015841793 | 1 | 1   | protein adenylation                                                          | G6PD,GPI,                         |
| GO:0018175 | 0.015841793 | 1 | 1   | protein nucleotidylation                                                     | FICD,                             |
| GO:0070613 | 0.016499143 | 7 | 185 | regulation of protein processing                                             | FICD,                             |
| GO:0019242 | 0.01673979  | 1 | 1   | methylglyoxal biosynthetic process                                           | N4BP1,PRKCG,C8A,SPOCK2,ENSACAG    |
| GO:0006099 | 0.016983803 | 3 | 36  | tricarboxylic acid cycle                                                     | 00000017928,ENSACAG00000011208,GP |
| GO:0001820 | 0.017145152 | 1 | 1   | serotonin secretion                                                          | I,                                |
| GO:0071226 | 0.017145152 | 1 | 1   | cellular response to molecule of fungal origin                               | GPI,                              |
| GO:0030209 | 0.017226685 | 1 | 1   | dermatan sulfate catabolic process                                           | MDH2,ENSACAG00000015409,DLAT,     |
| GO:0032799 | 0.017277767 | 1 | 1   | low-density lipoprotein receptor particle metabolic process                  | SYK,                              |
| GO:2000646 | 0.017277767 | 1 | 1   | positive regulation of receptor catabolic process                            | SYK,                              |
| GO:1903770 | 0.017288441 | 1 | 1   | negative regulation of beta-galactosidase activity                           | IDUA,                             |
| GO:0034447 | 0.017346009 | 1 | 1   | very-low-density lipoprotein particle clearance                              | PCSK9,                            |
| GO:0035037 | 0.017346009 | 1 | 1   | sperm entry                                                                  | PCSK9,                            |
| GO:1902396 | 0.017346009 | 1 | 1   | protein localization to bicellular tight junction                            | TERF2,                            |
| GO:1904925 | 0.017346009 | 1 | 1   | positive regulation of mitophagy in response to mitochondrial depolarization | VLDLR,                            |
| GO:0030954 | 0.017347767 | 1 | 1   | astral microtubule nucleation                                                | UBE3A,                            |
| GO:0051300 | 0.017347767 | 1 | 1   | spindle pole body organization                                               | ACTN4,                            |
| GO:1903320 | 0.019252433 | 7 | 192 | regulation of protein modification by small protein conjugation or removal   | HK2,                              |
| GO:0043278 | 0.019642871 | 2 | 16  | response to morphine                                                         | CENPJ,                            |
| GO:0045948 | 0.020702823 | 2 | 15  | positive regulation of translational initiation                              | CENPJ,                            |
| GO:0032886 | 0.021115779 | 6 | 144 | regulation of microtubule-based process                                      | N4BP1,PRKCG,UBE2L3,UBE3A,TOLLIP   |
| GO:2000452 | 0.021183419 | 1 | 2   | regulation of CD8-positive, alpha-beta cytotoxic T cell                      | ,UBXN2A,HSPA5,                    |
|            |             |   |     |                                                                              | PRKCG,GPI,                        |
|            |             |   |     |                                                                              | ENSACAG00000017928,IMPACT,        |
|            |             |   |     |                                                                              | TPX2,CHMP5,MID1IP1,CENPJ,ANKRD5   |
|            |             |   |     |                                                                              | 3,INPP5J,                         |
|            |             |   |     |                                                                              | FADD,                             |

|            |             |   |     |                                                                       |                                                                     |
|------------|-------------|---|-----|-----------------------------------------------------------------------|---------------------------------------------------------------------|
|            |             |   |     | extravasation                                                         |                                                                     |
| GO:0018107 | 0.021340109 | 3 | 38  | peptidyl-threonine phosphorylation                                    | PKN1,ENSACAG00000014806,OXSR1,                                      |
| GO:0090129 | 0.021361991 | 2 | 14  | positive regulation of synapse maturation                             | NEUROD2,RELN,                                                       |
| GO:2000451 | 0.021370434 | 1 | 2   | positive regulation of CD8-positive, alpha-beta T cell extravasation  | FADD,                                                               |
| GO:0051341 | 0.021526069 | 3 | 42  | regulation of oxidoreductase activity                                 | NOSIP,DDAH2,TERF2,                                                  |
| GO:0006891 | 0.021756999 | 3 | 42  | intra-Golgi vesicle-mediated transport                                | COPB2,ENSACAG00000017858,PACS1,                                     |
| GO:0007613 | 0.021814209 | 4 | 70  | memory                                                                | RELN,VLDLR,ENSACAG00000016987,CALB1,                                |
| GO:0042986 | 0.022103676 | 1 | 2   | positive regulation of amyloid precursor protein biosynthetic process | PAWR,                                                               |
| GO:0072376 | 0.022507535 | 4 | 94  | protein activation cascade                                            | C8A,CFP,ENSACAG00000011208,ENSACAG00000007262,                      |
| GO:0035561 | 0.022567455 | 2 | 15  | regulation of chromatin binding                                       | FBXO18,BTAF1,                                                       |
| GO:0042094 | 0.022698409 | 1 | 2   | interleukin-2 biosynthetic process                                    | PAWR,                                                               |
| GO:0072350 | 0.022884787 | 3 | 40  | tricarboxylic acid metabolic process                                  | MDH2,ENSACAG00000015409,DLAT,                                       |
| GO:0001912 | 0.023026387 | 2 | 17  | positive regulation of leukocyte mediated cytotoxicity                | FADD,CADM1,                                                         |
| GO:0097327 | 0.023105093 | 1 | 2   | response to antineoplastic agent                                      | PTGR1,                                                              |
| GO:0010447 | 0.023203718 | 2 | 16  | response to acidic pH                                                 | ENSACAG00000016987,IMPACT,                                          |
| GO:0006413 | 0.023229974 | 4 | 86  | translational initiation                                              | EIF2B3,MRPL19,EIF4G1,EIF2D,                                         |
| GO:0031330 | 0.024274741 | 5 | 110 | negative regulation of cellular catabolic process                     | N4BP1,PRKCG,TOB1,HERC1,NPC1,                                        |
| GO:0033539 | 0.024678395 | 2 | 16  | fatty acid beta-oxidation using acyl-CoA dehydrogenase                | ACOX1,ACAD8,                                                        |
| GO:0006391 | 0.025416402 | 1 | 2   | transcription initiation from mitochondrial promoter                  | TFAM,                                                               |
| GO:1902078 | 0.026050719 | 1 | 1   | positive regulation of lateral motor column neuron migration          | RELN,                                                               |
| GO:0006414 | 0.026210392 | 3 | 58  | translational elongation                                              | GTPBP1,RPLP2,MRPL19,                                                |
| GO:2000483 | 0.026399167 | 1 | 2   | negative regulation of interleukin-8 secretion                        | ANXA4,                                                              |
|            |             |   |     |                                                                       | ATP6V0A1,ENSACAG00000017858,SYK,                                    |
| GO:0015672 | 0.02708898  | 9 | 293 | monovalent inorganic cation transport                                 | ENSACAG00000016987,COMMD9,KCN C1,SLC17A7,ENSACAG00000021101,COMMD3, |
| GO:0006814 | 0.027147063 | 5 | 108 | sodium ion transport                                                  | ENSACAG00000017858,ENSACAG00000                                     |

|            |             |   |     |                                                                                                  |                                                             |
|------------|-------------|---|-----|--------------------------------------------------------------------------------------------------|-------------------------------------------------------------|
| GO:0007512 | 0.027964815 | 2 | 11  | adult heart development                                                                          | 016987,COMMD9,SLC17A7,COMMD3,MYH10,ENSACAG00000017266,      |
| GO:0046166 | 0.028448545 | 1 | 2   | glyceraldehyde-3-phosphate biosynthetic process                                                  | TKT,                                                        |
| GO:0021762 | 0.028619536 | 2 | 20  | substantia nigra development                                                                     | HSPA5,PLP1,                                                 |
| GO:0071649 | 0.028887326 | 1 | 2   | regulation of chemokine (C-C motif) ligand 5 production                                          | ENSACAG00000017928,                                         |
| GO:0031581 | 0.030174085 | 2 | 11  | hemidesmosome assembly                                                                           | ENSACAG00000005967,LAMA3,                                   |
| GO:0018210 | 0.030232141 | 3 | 43  | peptidyl-threonine modification                                                                  | PKN1,ENSACAG00000014806,OXSR1,                              |
| GO:0071494 | 0.030330313 | 1 | 2   | cellular response to UV-C                                                                        | IMPACT,                                                     |
| GO:0006084 | 0.030457606 | 2 | 18  | acetyl-CoA metabolic process                                                                     | NUDT7,DLAT,                                                 |
| GO:1900152 | 0.030514019 | 1 | 2   | negative regulation of nuclear-transcribed mRNA catabolic process, deadenylation-dependent decay | TOB1,                                                       |
| GO:0031123 | 0.031572269 | 4 | 81  | RNA 3'-end processing                                                                            | AHCYL1,CSTF3,TRNT1,EIF4G1,                                  |
| GO:0045113 | 0.032044776 | 1 | 3   | regulation of integrin biosynthetic process                                                      | TMEFF2,                                                     |
| GO:0046686 | 0.032379888 | 2 | 19  | response to cadmium ion                                                                          | GPI,NPC1,                                                   |
| GO:1902412 | 0.03258221  | 1 | 2   | regulation of mitotic cytokinesis                                                                | ANKRD53,                                                    |
| GO:0001682 | 0.033462908 | 1 | 2   | tRNA 5'-leader removal                                                                           | ENSACAG00000001929,                                         |
| GO:0071600 | 0.033857467 | 1 | 2   | otic vesicle morphogenesis                                                                       | SHARPIN,                                                    |
| GO:1902903 | 0.034061414 | 1 | 2   | regulation of fibril organization                                                                | HSPA5,                                                      |
| GO:0070207 | 0.034157869 | 2 | 20  | protein homotrimerization                                                                        | ENSACAG00000016987,HSF1,                                    |
| GO:0071873 | 0.034394106 | 1 | 2   | response to norepinephrine                                                                       | COL1A2,                                                     |
| GO:2000449 | 0.034976281 | 1 | 3   | regulation of CD8-positive, alpha-beta T cell extravasation                                      | FADD,                                                       |
| GO:0003351 | 0.035499433 | 2 | 18  | epithelial cilium movement                                                                       | CCDC39,DNAI1,                                               |
| GO:0006658 | 0.035829569 | 2 | 20  | phosphatidylserine metabolic process                                                             | SERINC3,PTDSS1,                                             |
| GO:0006091 | 0.035992015 | 6 | 179 | generation of precursor metabolites and energy                                                   | ENSACAG00000005218,NDUFB3,ACOX1,GPI,ENSACAG00000003255,HK2, |
| GO:0015985 | 0.036334539 | 2 | 26  | energy coupled proton transport, down electrochemical gradient                                   | ATP6V0A1,ENSACAG00000021101,                                |
| GO:0055003 | 0.037311755 | 2 | 14  | cardiac myofibril assembly                                                                       | MYH10,ENSACAG00000017266,                                   |
| GO:1903445 | 0.038832855 | 1 | 3   | protein transport from ciliary membrane to plasma membrane                                       | RILPL2,                                                     |
| GO:0051452 | 0.038881033 | 2 | 25  | intracellular pH reduction                                                                       | ATP6V0A1,ENSACAG00000013950,                                |

|            |             |    |     |                                                            |                                   |
|------------|-------------|----|-----|------------------------------------------------------------|-----------------------------------|
| GO:0051258 | 0.039002358 | 3  | 56  | protein polymerization                                     | MID1IP1,FGB,CENPJ,                |
| GO:0080135 | 0.039499082 | 12 | 463 | regulation of cellular response to stress                  | FBXO18,PTPRF,PDCD4,PAWR,NUP50,S   |
| GO:0042149 | 0.039651164 | 2  | 21  | cellular response to glucose starvation                    | ERINC3,SPRED1,TERF2,ENSACAG0000   |
| GO:1901033 | 0.039701641 | 1  | 3   | positive regulation of response to reactive oxygen species | 0004565,IMPACT,NPC1,CAPN1,        |
| GO:0009132 | 0.039723333 | 2  | 24  | nucleoside diphosphate metabolic process                   | HSPA5,IMPACT,                     |
| GO:0072429 | 0.040243661 | 1  | 3   | response to intra-S DNA damage checkpoint signaling        | PAWR,                             |
| GO:0070681 | 0.040883428 | 1  | 3   | glutaminyl-tRNAGln biosynthesis via transamidation         | NUDT7,AK2,                        |
| GO:0022411 | 0.042246886 | 6  | 175 | cellular component disassembly                             | FBXO18,                           |
| GO:0006574 | 0.042399324 | 1  | 3   | valine catabolic process                                   | GATB,                             |
| GO:0007080 | 0.042727231 | 2  | 23  | mitotic metaphase plate congression                        | NUP50,CASP6,ICT1,LAMA3,EIF2D,CAP  |
| GO:0009826 | 0.043786731 | 1  | 3   | unidimensional cell growth                                 | N1,                               |
| GO:0034436 | 0.044025394 | 1  | 3   | glycoprotein transport                                     | ACAD8,                            |
| GO:0034508 | 0.044420402 | 1  | 3   | centromere complex assembly                                | CHMP5,ANKRD53,                    |
| GO:0030538 | 0.044739211 | 1  | 4   | embryonic genitalia morphogenesis                          | CADM1,                            |
| GO:0090342 | 0.045077091 | 2  | 26  | regulation of cell aging                                   | VLDLR,                            |
| GO:0030198 | 0.045772926 | 7  | 210 | extracellular matrix organization                          | CENPN,                            |
| GO:0060670 | 0.045838069 | 1  | 4   | branching involved in labyrinthine layer morphogenesis     | ROR2,                             |
| GO:0046395 | 0.045874003 | 6  | 172 | carboxylic acid catabolic process                          | PAWR,TERF2,                       |
| GO:0030162 | 0.04646724  | 10 | 384 | regulation of proteolysis                                  | COL1A2,SPOCK2,ABI3BP,COL18A1,LA   |
| GO:0032200 | 0.046917447 | 3  | 52  | telomere organization                                      | MA3,SPINT1,CAPN1,                 |
| GO:0033387 | 0.047045378 | 1  | 3   | putrescine biosynthetic process from ornithine             | SPINT1,                           |
| GO:0034334 | 0.047327023 | 1  | 3   | adherens junction maintenance                              | ACAA2,ACOX1,ENSACAG00000004847,   |
| GO:0043062 | 0.047338548 | 7  | 212 | extracellular structure organization                       | DDAH2,IDUA,ACAD8,                 |
|            |             |    |     |                                                            | N4BP1,PRKCG,FADD,SPOCK2,UBE3A,    |
|            |             |    |     |                                                            | ENSACAG00000017928,ENSACAG00000   |
|            |             |    |     |                                                            | 015126,ENSACAG00000029485,GPI,ENS |
|            |             |    |     |                                                            | ACAG00000014806,                  |
|            |             |    |     |                                                            | TERF2,POLA2,XRCC5,                |
|            |             |    |     |                                                            | ODC1,                             |
|            |             |    |     |                                                            | RASSF8,                           |
|            |             |    |     |                                                            | COL1A2,SPOCK2,ABI3BP,COL18A1,LA   |
|            |             |    |     |                                                            | MA3,SPINT1,CAPN1,                 |

|            |             |   |   |                                                |        |
|------------|-------------|---|---|------------------------------------------------|--------|
| GO:0034620 | 0.048675433 | 1 | 4 | cellular response to unfolded protein          | PACRG, |
| GO:2000189 | 0.048956469 | 1 | 3 | positive regulation of cholesterol homeostasis | NPC1,  |
| GO:0097475 | 0.048990869 | 1 | 3 | motor neuron migration                         | RELN,  |
| GO:0060546 | 0.049267568 | 1 | 4 | negative regulation of necroptotic process     | FADD,  |

**Table S35. PSGs identified on branch 4 of lizard.**

| Ensembl Prot ID    | Ensembl Gene ID    | Ensembl Trans ID   | HNGC Name |
|--------------------|--------------------|--------------------|-----------|
| ENSACAP00000011291 | ENSACAG00000011517 | ENSACAT00000011528 | FHAD1     |
| ENSACAP00000012390 | ENSACAG00000012619 | ENSACAT00000012643 | HSPG2     |
| ENSACAP00000000682 | ENSACAG00000000750 | ENSACAT00000000704 | ARSA      |
| ENSACAP00000002992 | ENSACAG00000003104 | ENSACAT00000003069 |           |
| ENSACAP00000012484 | ENSACAG00000012665 | ENSACAT00000012740 | STK17B    |
| ENSACAP00000015433 | ENSACAG00000015663 | ENSACAT00000015746 | CTSH      |
| ENSACAP00000000960 | ENSACAG00000000835 | ENSACAT00000000988 |           |
| ENSACAP00000014306 | ENSACAG00000014599 | ENSACAT00000014599 | SOCS1     |
| ENSACAP00000005501 | ENSACAG00000005357 | ENSACAT00000005621 | MYOM3     |
| ENSACAP00000022471 | ENSACAG00000028660 | ENSACAT00000029888 |           |
| ENSACAP00000023045 | ENSACAG00000013110 | ENSACAT00000030466 | ACSF3     |
| ENSACAP00000003934 | ENSACAG00000004012 | ENSACAT00000004026 | RABEPK    |
| ENSACAP00000008291 | ENSACAG00000008337 | ENSACAT00000008470 | KDM4B     |
| ENSACAP00000006471 | ENSACAG00000006602 | ENSACAT00000006616 | ZNF282    |
| ENSACAP00000010379 | ENSACAG00000010571 | ENSACAT00000010593 | C1orf43   |
| ENSACAP00000007881 | ENSACAG00000008005 | ENSACAT00000008047 | PHACTR2   |
| ENSACAP00000009591 | ENSACAG00000009744 | ENSACAT00000009788 |           |
| ENSACAP00000016986 | ENSACAG00000017256 | ENSACAT00000017321 | PLEKHA3   |
| ENSACAP00000015845 | ENSACAG00000016110 | ENSACAT00000016162 | IGSF8     |
| ENSACAP00000018353 | ENSACAG00000008223 | ENSACAT00000027398 | CD34      |

|                    |                    |                    |           |
|--------------------|--------------------|--------------------|-----------|
| ENSACAP00000021652 | ENSACAG00000017540 | ENSACAT00000017605 | ADAT3     |
| ENSACAP00000010555 | ENSACAG00000010722 | ENSACAT00000010773 | ISYNA1    |
| ENSACAP00000003401 | ENSACAG00000003460 | ENSACAT00000003484 | ANKRD12   |
| ENSACAP00000009853 | ENSACAG00000010057 | ENSACAT00000010055 | SKA1      |
| ENSACAP00000013205 | ENSACAG00000013451 | ENSACAT00000013471 | GJA4      |
| ENSACAP00000000998 | ENSACAG00000001095 | ENSACAT00000001026 | KIAA0895L |
| ENSACAP00000000281 | ENSACAG00000000317 | ENSACAT00000000288 | C17orf58  |
| ENSACAP00000001060 | ENSACAG00000001118 | ENSACAT00000001089 | POLG2     |
| ENSACAP00000010499 | ENSACAG00000010552 | ENSACAT00000010716 | DVL3      |
| ENSACAP00000012483 | ENSACAG00000012625 | ENSACAT00000012739 | AQP3      |
| ENSACAP00000014597 | ENSACAG00000014876 | ENSACAT00000014892 | SPATA22   |
| ENSACAP00000000214 | ENSACAG00000000225 | ENSACAT00000000218 | BRF2      |
| ENSACAP00000015062 | ENSACAG00000015305 | ENSACAT00000015366 |           |
| ENSACAP00000021940 | ENSACAG00000028558 | ENSACAT00000029358 | EIF4EBP1  |
| ENSACAP00000011037 | ENSACAG00000011272 | ENSACAT00000011265 | C3AR1     |
| ENSACAP00000005668 | ENSACAG00000005806 | ENSACAT00000005792 | HGFAC     |
| ENSACAP00000007661 | ENSACAG00000007830 | ENSACAT00000007825 | FETUB     |
| ENSACAP00000008430 | ENSACAG00000008564 | ENSACAT00000008612 | GLE1      |
| ENSACAP00000017509 | ENSACAG00000017781 | ENSACAT00000017854 | CNKSR1    |
| ENSACAP00000015047 | ENSACAG00000015242 | ENSACAT00000015351 | MYO1E     |
| ENSACAP00000019631 | ENSACAG00000000549 | ENSACAT00000028168 | DENND3    |
| ENSACAP00000010841 | ENSACAG00000010764 | ENSACAT00000011065 | P2RX6     |
| ENSACAP00000019300 | ENSACAG00000024425 | ENSACAT00000022888 | EMC1      |
| ENSACAP00000006188 | ENSACAG00000006279 | ENSACAT00000006325 | GLYR1     |
| ENSACAP00000007179 | ENSACAG00000007342 | ENSACAT00000007334 |           |
| ENSACAP00000013818 | ENSACAG00000013984 | ENSACAT00000014100 | LRRCC1    |
| ENSACAP00000004437 | ENSACAG00000004560 | ENSACAT00000004537 | IQCD      |
| ENSACAP00000011352 | ENSACAG00000011361 | ENSACAT00000011591 | MAPK8     |
| ENSACAP00000007549 | ENSACAG00000007617 | ENSACAT00000007710 | LMAN1     |
| ENSACAP00000004704 | ENSACAG00000004785 | ENSACAT00000004811 | RASGEF1A  |



|                    |                    |                    |          |
|--------------------|--------------------|--------------------|----------|
| ENSACAP0000008436  | ENSACAG0000008572  | ENSACAT0000008618  | MAGT1    |
| ENSACAP00000017488 | ENSACAG00000017762 | ENSACAT00000017833 | ARHGEF16 |
| ENSACAP00000017417 | ENSACAG00000017674 | ENSACAT00000017759 | STX12    |
| ENSACAP00000017385 | ENSACAG00000017653 | ENSACAT00000017726 |          |
| ENSACAP00000008212 | ENSACAG00000008373 | ENSACAT00000008389 | CRK      |
| ENSACAP00000006308 | ENSACAG00000006461 | ENSACAT00000006448 | NUFIP1   |
| ENSACAP00000015300 | ENSACAG00000015568 | ENSACAT00000015612 | C7orf26  |
| ENSACAP00000007053 | ENSACAG00000007195 | ENSACAT00000007205 | GPAA1    |
| ENSACAP00000016401 | ENSACAG00000016644 | ENSACAT00000016726 | ZDHHC18  |
| ENSACAP00000020153 | ENSACAG00000014990 | ENSACAT00000022361 | LRSAM1   |
| ENSACAP00000002176 | ENSACAG00000002229 | ENSACAT00000002235 | SERPINH1 |
| ENSACAP00000007984 | ENSACAG00000008166 | ENSACAT00000008155 | COMMD10  |
| ENSACAP00000003831 | ENSACAG00000003908 | ENSACAT00000003923 | MDM1     |
| ENSACAP00000004473 | ENSACAG00000004492 | ENSACAT00000004576 | CCT2     |
| ENSACAP00000018624 | ENSACAG00000001148 | ENSACAT00000022260 | CTDP1    |
| ENSACAP00000022810 | ENSACAG00000028873 | ENSACAT00000030228 | NME4     |
| ENSACAP00000009111 | ENSACAG00000009325 | ENSACAT00000009304 | PSMD5    |
| ENSACAP00000003383 | ENSACAG00000003402 | ENSACAT00000003466 | ATP1A1   |
| ENSACAP00000002430 | ENSACAG00000002451 | ENSACAT00000002493 | TBL3     |
| ENSACAP00000007154 | ENSACAG00000007239 | ENSACAT00000007309 |          |
| ENSACAP00000020020 | ENSACAG00000023926 | ENSACAT00000025106 |          |
| ENSACAP00000006499 | ENSACAG00000006640 | ENSACAT00000006644 | NFXL1    |
| ENSACAP00000016709 | ENSACAG00000016978 | ENSACAT00000017039 | RHBDL2   |
| ENSACAP00000019497 | ENSACAG00000026822 | ENSACAT00000025669 |          |
| ENSACAP00000004411 | ENSACAG00000004517 | ENSACAT00000004511 | MRPL47   |
| ENSACAP00000013551 | ENSACAG00000013799 | ENSACAT00000013829 | YIPF5    |
| ENSACAP00000005833 | ENSACAG00000005770 | ENSACAT00000005962 | STXBP3   |
| ENSACAP00000021056 | ENSACAG00000016378 | ENSACAT00000022547 | FBXO43   |
| ENSACAP00000011360 | ENSACAG00000011582 | ENSACAT00000011599 | NSRP1    |
| ENSACAP00000000775 | ENSACAG00000000756 | ENSACAT00000000799 | CDC45    |

|                    |                    |                    |          |
|--------------------|--------------------|--------------------|----------|
| ENSACAP00000012662 | ENSACAG00000012768 | ENSACAT00000012918 |          |
| ENSACAP00000002209 | ENSACAG00000001756 | ENSACAT00000002269 | ATP2C1   |
| ENSACAP00000002352 | ENSACAG00000002469 | ENSACAT00000002412 | ADIPOQ   |
| ENSACAP00000022445 | ENSACAG00000029434 | ENSACAT00000029862 |          |
| ENSACAP00000009871 | ENSACAG00000009938 | ENSACAT00000010074 |          |
| ENSACAP00000008472 | ENSACAG00000008565 | ENSACAT00000008654 | EXOC3    |
| ENSACAP00000023118 | ENSACAG00000029342 | ENSACAT00000030538 | ITGB3BP  |
| ENSACAP00000008789 | ENSACAG00000008914 | ENSACAT00000008977 | USO1     |
| ENSACAP00000010441 | ENSACAG00000010644 | ENSACAT00000010655 |          |
| ENSACAP00000012885 | ENSACAG00000013098 | ENSACAT00000013143 |          |
| ENSACAP00000012965 | ENSACAG00000013012 | ENSACAT00000013224 | APAF1    |
| ENSACAP00000013079 | ENSACAG00000013303 | ENSACAT00000013339 | TMEM106A |
| ENSACAP00000022598 | ENSACAG00000016414 | ENSACAT00000030015 |          |
| ENSACAP00000001815 | ENSACAG00000001870 | ENSACAT00000001859 | MKNK1    |
| ENSACAP00000014276 | ENSACAG00000014491 | ENSACAT00000014569 | NUAK2    |
| ENSACAP00000019602 | ENSACAG00000022624 | ENSACAT00000027362 | GSDMA    |
| ENSACAP00000000780 | ENSACAG00000000798 | ENSACAT00000000804 | WBP4     |
| ENSACAP00000001520 | ENSACAG00000001618 | ENSACAT00000001556 | XRCC6BP1 |
| ENSACAP00000002162 | ENSACAG00000002060 | ENSACAT00000002221 | SLC38A2  |
| ENSACAP00000016104 | ENSACAG00000016245 | ENSACAT00000016424 |          |
| ENSACAP00000022931 | ENSACAG00000002987 | ENSACAT00000030350 | TPP2     |
| ENSACAP00000000748 | ENSACAG00000000689 | ENSACAT00000000772 | GAS6     |
| ENSACAP00000001185 | ENSACAG00000001294 | ENSACAT00000001218 | PACRGL   |
| ENSACAP00000001539 | ENSACAG00000001584 | ENSACAT00000001575 | PRPS2    |
| ENSACAP00000008255 | ENSACAG00000008338 | ENSACAT00000008432 | EDEM2    |
| ENSACAP00000014380 | ENSACAG00000014456 | ENSACAT00000014673 | FBLN1    |
| ENSACAP00000015430 | ENSACAG00000015683 | ENSACAT00000015743 | NUP50    |
| ENSACAP00000015610 | ENSACAG00000015880 | ENSACAT00000015924 | TSPO     |
| ENSACAP00000016592 | ENSACAG00000016869 | ENSACAT00000016918 | SERINC3  |
| ENSACAP00000015866 | ENSACAG00000016035 | ENSACAT00000016184 | GNAI1    |

|                    |                    |                    |           |
|--------------------|--------------------|--------------------|-----------|
| ENSACAP00000017579 | ENSACAG00000017853 | ENSACAT00000017925 | PDXK      |
| ENSACAP00000004938 | ENSACAG00000005042 | ENSACAT00000005051 |           |
| ENSACAP00000014949 | ENSACAG00000015225 | ENSACAT00000015252 | C3orf38   |
| ENSACAP00000022414 | ENSACAG00000029246 | ENSACAT00000029831 | CD47      |
| ENSACAP00000011059 | ENSACAG00000011149 | ENSACAT00000011288 | TBC1D23   |
| ENSACAP00000016261 | ENSACAG00000016502 | ENSACAT00000016585 | ETFDH     |
| ENSACAP00000004459 | ENSACAG00000004541 | ENSACAT00000004560 | BRCA2     |
| ENSACAP00000004913 | ENSACAG00000004925 | ENSACAT00000005026 | HSPH1     |
| ENSACAP00000004935 | ENSACAG00000005067 | ENSACAT00000005048 | TEX26     |
| ENSACAP00000003266 | ENSACAG00000003023 | ENSACAT00000003349 | LRBA      |
| ENSACAP00000016452 | ENSACAG00000016683 | ENSACAT00000016777 | PAPD4     |
| ENSACAP00000005994 | ENSACAG00000006074 | ENSACAT00000006128 | PSAT1     |
| ENSACAP00000002234 | ENSACAG00000002270 | ENSACAT00000002294 | KANK1     |
| ENSACAP00000022348 | ENSACAG00000029075 | ENSACAT00000029765 | CD274     |
| ENSACAP00000006487 | ENSACAG00000006636 | ENSACAT00000006632 | ABT1      |
| ENSACAP00000006592 | ENSACAG00000006650 | ENSACAT00000006739 | ESPL1     |
| ENSACAP00000008633 | ENSACAG00000008781 | ENSACAT00000008816 |           |
| ENSACAP00000009667 | ENSACAG00000009814 | ENSACAT00000009864 | C14orf159 |
| ENSACAP00000014905 | ENSACAG00000014786 | ENSACAT00000015208 |           |
| ENSACAP00000014848 | ENSACAG00000015126 | ENSACAT00000015149 |           |
| ENSACAP00000016045 | ENSACAG00000016309 | ENSACAT00000016365 | ZFYVE1    |
| ENSACAP00000014599 | ENSACAG00000014815 | ENSACAT00000014894 | PEX16     |
| ENSACAP00000004222 | ENSACAG00000004323 | ENSACAT00000004321 | CD44      |
| ENSACAP00000008602 | ENSACAG00000008776 | ENSACAT00000008785 | KANSL2    |
| ENSACAP00000008205 | ENSACAG00000007961 | ENSACAT00000008381 | KRT7      |
| ENSACAP00000021933 | ENSACAG00000029485 | ENSACAT00000029351 |           |
| ENSACAP00000009525 | ENSACAG00000009732 | ENSACAT00000009722 | DTX3L     |
| ENSACAP00000010337 | ENSACAG00000010381 | ENSACAT00000010550 | KALRN     |
| ENSACAP00000004880 | ENSACAG00000004997 | ENSACAT00000004992 | HSPBAP1   |
| ENSACAP00000008191 | ENSACAG00000008318 | ENSACAT00000008367 | UBE2O     |

|                    |                    |                    |          |
|--------------------|--------------------|--------------------|----------|
| ENSACAP0000007651  | ENSACAG0000007663  | ENSACAT0000007814  | ADRBK1   |
| ENSACAP0000008347  | ENSACAG0000008489  | ENSACAT0000008528  | ACY3     |
| ENSACAP0000008796  | ENSACAG0000008948  | ENSACAT0000008984  |          |
| ENSACAP0000002970  | ENSACAG0000003082  | ENSACAT0000003047  | GTDC1    |
| ENSACAP00000021654 | ENSACAG00000023811 | ENSACAT00000026478 | ZEB2     |
| ENSACAP00000015946 | ENSACAG00000016212 | ENSACAT00000016264 | SPDL1    |
| ENSACAP00000012528 | ENSACAG00000012723 | ENSACAT00000012784 | RAD50    |
| ENSACAP00000001750 | ENSACAG00000001863 | ENSACAT00000001790 | CEP68    |
| ENSACAP00000001097 | ENSACAG00000001044 | ENSACAT00000001129 |          |
| ENSACAP00000005633 | ENSACAG00000005737 | ENSACAT00000005756 | FAM193B  |
| ENSACAP00000003415 | ENSACAG00000003413 | ENSACAT00000003499 | RB1      |
| ENSACAP00000006790 | ENSACAG00000006937 | ENSACAT00000006938 | GFRA3    |
| ENSACAP00000011479 | ENSACAG00000011679 | ENSACAT00000011719 | RNASEH2B |
| ENSACAP00000009033 | ENSACAG00000009153 | ENSACAT00000009226 | OASL     |
| ENSACAP00000007772 | ENSACAG00000007499 | ENSACAT00000007938 |          |
| ENSACAP00000020536 | ENSACAG00000005884 | ENSACAT00000025744 | CCDC66   |
| ENSACAP00000010137 | ENSACAG00000010294 | ENSACAT00000010345 | SUMF1    |
| ENSACAP00000014659 | ENSACAG00000014913 | ENSACAT00000014956 | TCAIM    |
| ENSACAP00000008284 | ENSACAG00000008420 | ENSACAT00000008463 | VTA1     |
| ENSACAP00000019777 | ENSACAG00000026326 | ENSACAT00000022565 |          |
| ENSACAP00000010774 | ENSACAG00000011003 | ENSACAT00000010997 |          |
| ENSACAP00000001376 | ENSACAG00000001463 | ENSACAT00000001409 | GGPS1    |
| ENSACAP00000001348 | ENSACAG00000001289 | ENSACAT00000001381 | ARID4B   |
| ENSACAP00000002671 | ENSACAG00000002728 | ENSACAT00000002738 | DISC1    |
| ENSACAP00000012781 | ENSACAG00000012647 | ENSACAT00000013037 |          |
| ENSACAP00000008325 | ENSACAG00000008473 | ENSACAT00000008506 | RMDN2    |
| ENSACAP00000016112 | ENSACAG00000016371 | ENSACAT00000016433 | TRAF5    |
| ENSACAP00000013794 | ENSACAG00000013917 | ENSACAT00000014076 | MSH2     |

---

**Table S36. GO terms associated with PSGs identified on lizard branch 4.**

| category   | pvalue      | numDE<br>InCat | numIn<br>Cat | term                                                       | GeneNames                                                                                                          |
|------------|-------------|----------------|--------------|------------------------------------------------------------|--------------------------------------------------------------------------------------------------------------------|
| GO:0036462 | 0.000111602 | 2              | 2            | TRAIL-activated apoptotic signaling pathway                | FADD,ENSACAG00000029485                                                                                            |
| GO:0071470 | 0.000147044 | 4              | 20           | cellular response to osmotic stress                        | ENSACAG00000017928,RELB,OXSRI,XRCC5                                                                                |
| GO:0035795 | 0.000274784 | 2              | 2            | negative regulation of mitochondrial membrane permeability | ACAA2,HK2                                                                                                          |
| GO:1904430 | 0.00029842  | 2              | 2            | negative regulation of t-circle formation                  | TERF2,XRCC5                                                                                                        |
| GO:0006081 | 0.001064851 | 5              | 55           | cellular aldehyde metabolic process                        | G6PD,TKT,GPI,DLAT,GRHPR                                                                                            |
| GO:0006957 | 0.001105394 | 3              | 14           | complement activation, alternative pathway                 | C8A,CFP,ENSACAG00000011208                                                                                         |
| GO:0038026 | 0.001209879 | 2              | 3            | reelin-mediated signaling pathway                          | RELN,VLDLR                                                                                                         |
| GO:0046184 | 0.001257641 | 2              | 4            | aldehyde biosynthetic process                              | TKT,GPI                                                                                                            |
| GO:0001945 | 0.001288649 | 2              | 4            | lymph vessel development                                   | EFNB2,SYK                                                                                                          |
| GO:0006006 | 0.001696709 | 6              | 84           | glucose metabolic process                                  | G6PD,GPI,DLAT,ENSACAG00000003255,HK2, BRAT1                                                                        |
| GO:0060236 | 0.001864445 | 3              | 16           | regulation of mitotic spindle organization                 | TPX2,CHMP5,ANKRD53                                                                                                 |
| GO:0033555 | 0.002850564 | 4              | 43           | multicellular organismal response to stress                | PRKCG,NEUROD2,RELN,EIF4G1                                                                                          |
| GO:0050999 | 0.003771516 | 3              | 22           | regulation of nitric-oxide synthase activity               | NOSIP,DDAH2,TERF2                                                                                                  |
| GO:0006970 | 0.004009937 | 4              | 45           | response to osmotic stress                                 | ENSACAG00000017928,RELB,OXSRI,XRCC5                                                                                |
| GO:0031175 | 0.0043879   | 7              | 137          | neuron projection development                              | EFHD1,AREG,PTPRF,RELN,CDK16,HERC1,PL P1                                                                            |
| GO:1902857 | 0.004948652 | 2              | 7            | positive regulation of nonmotile primary cilium assembly   | SEPT12,CENPJ                                                                                                       |
| GO:0042129 | 0.006033309 | 5              | 85           | regulation of T cell proliferation                         | FADD,PAWR,SYK,DNAJA3,CD276                                                                                         |
| GO:0045087 | 0.00606838  | 11             | 316          | innate immune response                                     | FADD,C8A,SERINC3,ENSACAG00000017928, ENSACAG00000021135,SYK,CFP,TOLLIP,RELB,ENSACAG00000011208,ENSACAG00000007 262 |
| GO:0006090 | 0.007123617 | 4              | 50           | pyruvate metabolic process                                 | GPI,DLAT,ENSACAG00000003255,HK2                                                                                    |
| GO:0097049 | 0.007383836 | 1              | 1            | motor neuron apoptotic process                             | FADD                                                                                                               |
| GO:2000454 | 0.007383836 | 1              | 1            | positive regulation of CD8-positive, alpha-beta            | FADD                                                                                                               |

|            |             |    |     |                                                                                           |                                                                                                   |
|------------|-------------|----|-----|-------------------------------------------------------------------------------------------|---------------------------------------------------------------------------------------------------|
| GO:0021517 | 0.008225599 | 2  | 8   | cytotoxic T cell extravasation<br>ventral spinal cord development                         | RELN,VLDLR                                                                                        |
| GO:0046034 | 0.008958334 | 4  | 63  | ATP metabolic process                                                                     | ATP6V0A1,HSPA5,AK2,ENSACAG00000021101                                                             |
| GO:0035562 | 0.00921317  | 2  | 9   | negative regulation of chromatin binding                                                  | FBXO18,BTAF1                                                                                      |
| GO:0060598 | 0.009435699 | 1  | 1   | dichotomous subdivision of terminal units<br>involved in mammary gland duct morphogenesis | AREG                                                                                              |
| GO:0032787 | 0.009538867 | 13 | 417 | monocarboxylic acid metabolic process                                                     | ACAA2,SLC27A6,ACOX1,ENSACAG00000004847,GPI,DLAT,ENSACAG00000003255,PLP1,LDUA,GRHPR,NPC1,ACAD8,HK2 |
| GO:0048265 | 0.010396075 | 2  | 11  | response to pain                                                                          | PRKCG,RELN                                                                                        |
| GO:0046487 | 0.010592178 | 2  | 11  | glyoxylate metabolic process                                                              | DLAT,GRHPR                                                                                        |
| GO:0033869 | 0.011169222 | 1  | 1   | nucleoside bisphosphate catabolic process                                                 | NUDT7                                                                                             |
| GO:0034034 | 0.011169222 | 1  | 1   | purine nucleoside bisphosphate catabolic<br>process                                       | NUDT7                                                                                             |
| GO:0046356 | 0.011169222 | 1  | 1   | acetyl-CoA catabolic process                                                              | NUDT7                                                                                             |
| GO:0021680 | 0.011623862 | 2  | 11  | cerebellar Purkinje cell layer development                                                | MYH10,HSPA5                                                                                       |
| GO:0072027 | 0.011896872 | 1  | 1   | connecting tubule development                                                             | CALB1                                                                                             |
| GO:0072286 | 0.011896872 | 1  | 1   | metanephric connecting tubule development                                                 | CALB1                                                                                             |
| GO:0006480 | 0.012660835 | 1  | 1   | N-terminal protein amino acid methylation                                                 | METTL11B                                                                                          |
| GO:0006924 | 0.013094653 | 1  | 1   | activation-induced cell death of T cells                                                  | DNAJA3                                                                                            |
| GO:0072755 | 0.013281179 | 1  | 1   | cellular response to benomyl                                                              | IMPACT                                                                                            |
| GO:1901561 | 0.013281179 | 1  | 1   | response to benomyl                                                                       | IMPACT                                                                                            |
| GO:1903849 | 0.013859234 | 1  | 1   | positive regulation of aorta morphogenesis                                                | EFNB2                                                                                             |
| GO:0035786 | 0.014007207 | 1  | 1   | protein complex oligomerization                                                           | MCU                                                                                               |
| GO:0010035 | 0.014271971 | 10 | 299 | response to inorganic substance                                                           | AREG,AHCYL1,NEUROD2,SYK,KCNC1,COL18A1,GPI,ENSACAG00000017266,IMPACT,NPC1                          |
| GO:0048857 | 0.014548543 | 3  | 37  | neural nucleus development                                                                | KCNC1,HSPA5,PLP1                                                                                  |
| GO:0061620 | 0.014932553 | 2  | 12  | glycolytic process through glucose-6-phosphate                                            | GPI,HK2                                                                                           |
| GO:0051346 | 0.015290738 | 7  | 179 | negative regulation of hydrolase activity                                                 | SPOCK2,ENSACAG00000017928,SPRED1,GPI,                                                             |

|            |             |   |     |                                                                              |                                      |
|------------|-------------|---|-----|------------------------------------------------------------------------------|--------------------------------------|
| GO:0061300 | 0.015404067 | 1 | 2   | cerebellum vasculature development                                           | TERF2,FICD,TMED2                     |
| GO:0001680 | 0.015516298 | 1 | 1   | tRNA 3'-terminal CCA addition                                                | ENSACAG00000005218                   |
| GO:0051156 | 0.015814385 | 2 | 14  | glucose 6-phosphate metabolic process                                        | TRNT1                                |
| GO:0018117 | 0.015841793 | 1 | 1   | protein adenylylation                                                        | G6PD,GPI                             |
| GO:0018175 | 0.015841793 | 1 | 1   | protein nucleotidylation                                                     | FICD                                 |
| GO:0070613 | 0.016499143 | 7 | 185 | regulation of protein processing                                             | FICD                                 |
| GO:0019242 | 0.01673979  | 1 | 1   | methylglyoxal biosynthetic process                                           | N4BP1,PRKCG,C8A,SPOCK2,ENSACAG00000  |
| GO:0006099 | 0.016983803 | 3 | 36  | tricarboxylic acid cycle                                                     | 017928,ENSACAG00000011208,GPI        |
| GO:0001820 | 0.017145152 | 1 | 1   | serotonin secretion                                                          | GPI                                  |
| GO:0071226 | 0.017145152 | 1 | 1   | cellular response to molecule of fungal origin                               | MDH2,ENSACAG00000015409,DLAT         |
| GO:0030209 | 0.017226685 | 1 | 1   | dermatan sulfate catabolic process                                           | SYK                                  |
| GO:0032799 | 0.017277767 | 1 | 1   | low-density lipoprotein receptor particle metabolic process                  | SYK                                  |
| GO:2000646 | 0.017277767 | 1 | 1   | positive regulation of receptor catabolic process                            | IDUA                                 |
| GO:1903770 | 0.017288441 | 1 | 1   | negative regulation of beta-galactosidase activity                           | PCSK9                                |
| GO:0034447 | 0.017346009 | 1 | 1   | very-low-density lipoprotein particle clearance                              | PCSK9                                |
| GO:0035037 | 0.017346009 | 1 | 1   | sperm entry                                                                  | TERF2                                |
| GO:1902396 | 0.017346009 | 1 | 1   | protein localization to bicellular tight junction                            | VLDLR                                |
| GO:1904925 | 0.017346009 | 1 | 1   | positive regulation of mitophagy in response to mitochondrial depolarization | UBE3A                                |
| GO:0030954 | 0.017347767 | 1 | 1   | astral microtubule nucleation                                                | ACTN4                                |
| GO:0051300 | 0.017347767 | 1 | 1   | spindle pole body organization                                               | HK2                                  |
| GO:1903320 | 0.019252433 | 7 | 192 | regulation of protein modification by small protein conjugation or removal   | CENPJ                                |
| GO:0043278 | 0.019642871 | 2 | 16  | response to morphine                                                         | CENPJ                                |
| GO:0045948 | 0.020702823 | 2 | 15  | positive regulation of translational initiation                              | N4BP1,PRKCG,UBE2L3,UBE3A,TOLLIP,UBX  |
| GO:0032886 | 0.021115779 | 6 | 144 | regulation of microtubule-based process                                      | N2A,HSPA5                            |
| GO:2000452 | 0.021183419 | 1 | 2   | regulation of CD8-positive, alpha-beta cytotoxic                             | PRKCG,GPI                            |
|            |             |   |     |                                                                              | ENSACAG00000017928,IMPACT            |
|            |             |   |     |                                                                              | TPX2,CHMP5,MID1IP1,CENPJ,ANKRD53,INP |
|            |             |   |     |                                                                              | P5J                                  |
|            |             |   |     |                                                                              | FADD                                 |

|            |             |   |     |                                                                       |                                                                                                   |
|------------|-------------|---|-----|-----------------------------------------------------------------------|---------------------------------------------------------------------------------------------------|
|            |             |   |     | T cell extravasation                                                  |                                                                                                   |
| GO:0018107 | 0.021340109 | 3 | 38  | peptidyl-threonine phosphorylation                                    | PKN1,ENSACAG00000014806,OXSR1                                                                     |
| GO:0090129 | 0.021361991 | 2 | 14  | positive regulation of synapse maturation                             | NEUROD2,RELN                                                                                      |
| GO:2000451 | 0.021370434 | 1 | 2   | positive regulation of CD8-positive, alpha-beta T cell extravasation  | FADD                                                                                              |
| GO:0051341 | 0.021526069 | 3 | 42  | regulation of oxidoreductase activity                                 | NOSIP,DDAH2,TERF2                                                                                 |
| GO:0006891 | 0.021756999 | 3 | 42  | intra-Golgi vesicle-mediated transport                                | COPB2,ENSACAG00000017858,PACS1                                                                    |
| GO:0007613 | 0.021814209 | 4 | 70  | memory                                                                | RELN,VLDLR,ENSACAG00000016987,CALB1                                                               |
| GO:0042986 | 0.022103676 | 1 | 2   | positive regulation of amyloid precursor protein biosynthetic process | PAWR                                                                                              |
| GO:0072376 | 0.022507535 | 4 | 94  | protein activation cascade                                            | C8A,CFP,ENSACAG00000011208,ENSACAG0000007262                                                      |
| GO:0035561 | 0.022567455 | 2 | 15  | regulation of chromatin binding                                       | FBXO18,BTAF1                                                                                      |
| GO:0042094 | 0.022698409 | 1 | 2   | interleukin-2 biosynthetic process                                    | PAWR                                                                                              |
| GO:0072350 | 0.022884787 | 3 | 40  | tricarboxylic acid metabolic process                                  | MDH2,ENSACAG00000015409,DLAT                                                                      |
| GO:0001912 | 0.023026387 | 2 | 17  | positive regulation of leukocyte mediated cytotoxicity                | FADD,CADM1                                                                                        |
| GO:0097327 | 0.023105093 | 1 | 2   | response to antineoplastic agent                                      | PTGR1                                                                                             |
| GO:0010447 | 0.023203718 | 2 | 16  | response to acidic pH                                                 | ENSACAG00000016987,IMPACT                                                                         |
| GO:0006413 | 0.023229974 | 4 | 86  | translational initiation                                              | EIF2B3,MRPL19,EIF4G1,EIF2D                                                                        |
| GO:0031330 | 0.024274741 | 5 | 110 | negative regulation of cellular catabolic process                     | N4BP1,PRKCG,TOB1,HERC1,NPC1                                                                       |
| GO:0033539 | 0.024678395 | 2 | 16  | fatty acid beta-oxidation using acyl-CoA dehydrogenase                | ACOX1,ACAD8                                                                                       |
| GO:0006391 | 0.025416402 | 1 | 2   | transcription initiation from mitochondrial promoter                  | TFAM                                                                                              |
| GO:1902078 | 0.026050719 | 1 | 1   | positive regulation of lateral motor column neuron migration          | RELN                                                                                              |
| GO:0006414 | 0.026210392 | 3 | 58  | translational elongation                                              | GTPBP1,RPLP2,MRPL19                                                                               |
| GO:2000483 | 0.026399167 | 1 | 2   | negative regulation of interleukin-8 secretion                        | ANXA4                                                                                             |
| GO:0015672 | 0.02708898  | 9 | 293 | monovalent inorganic cation transport                                 | ATP6V0A1,ENSACAG00000017858,SYK,ENSACAG00000016987,COMMD9,KCNC1,SLC17A7,ENSACAG00000021101,COMMD3 |



|            |             |   |     |                                                                                                  |                                                                 |
|------------|-------------|---|-----|--------------------------------------------------------------------------------------------------|-----------------------------------------------------------------|
| GO:0006814 | 0.027147063 | 5 | 108 | sodium ion transport                                                                             | ENSACAG00000017858,ENSACAG0000001698<br>7,COMMD9,SLC17A7,COMMD3 |
| GO:0007512 | 0.027964815 | 2 | 11  | adult heart development                                                                          | MYH10,ENSACAG00000017266                                        |
| GO:0046166 | 0.028448545 | 1 | 2   | glyceraldehyde-3-phosphate biosynthetic process                                                  | TKT                                                             |
| GO:0021762 | 0.028619536 | 2 | 20  | substantia nigra development                                                                     | HSPA5,PLP1                                                      |
| GO:0071649 | 0.028887326 | 1 | 2   | regulation of chemokine (C-C motif) ligand 5 production                                          | ENSACAG00000017928                                              |
| GO:0031581 | 0.030174085 | 2 | 11  | hemidesmosome assembly                                                                           | ENSACAG00000005967,LAMA3                                        |
| GO:0018210 | 0.030232141 | 3 | 43  | peptidyl-threonine modification                                                                  | PKN1,ENSACAG00000014806,OXSR1                                   |
| GO:0071494 | 0.030330313 | 1 | 2   | cellular response to UV-C                                                                        | IMPACT                                                          |
| GO:0006084 | 0.030457606 | 2 | 18  | acetyl-CoA metabolic process                                                                     | NUDT7,DLAT                                                      |
| GO:1900152 | 0.030514019 | 1 | 2   | negative regulation of nuclear-transcribed mRNA catabolic process, deadenylation-dependent decay | TOB1                                                            |
| GO:0031123 | 0.031572269 | 4 | 81  | RNA 3'-end processing                                                                            | AHCYL1,CSTF3,TRNT1,EIF4G1                                       |
| GO:0045113 | 0.032044776 | 1 | 3   | regulation of integrin biosynthetic process                                                      | TMEFF2                                                          |
| GO:0046686 | 0.032379888 | 2 | 19  | response to cadmium ion                                                                          | GPI,NPC1                                                        |
| GO:1902412 | 0.03258221  | 1 | 2   | regulation of mitotic cytokinesis                                                                | ANKRD53                                                         |
| GO:0001682 | 0.033462908 | 1 | 2   | tRNA 5'-leader removal                                                                           | ENSACAG00000001929                                              |
| GO:0071600 | 0.033857467 | 1 | 2   | otic vesicle morphogenesis                                                                       | SHARPIN                                                         |
| GO:1902903 | 0.034061414 | 1 | 2   | regulation of fibril organization                                                                | HSPA5                                                           |
| GO:0070207 | 0.034157869 | 2 | 20  | protein homotrimerization                                                                        | ENSACAG00000016987,HSF1                                         |
| GO:0071873 | 0.034394106 | 1 | 2   | response to norepinephrine                                                                       | COL1A2                                                          |
| GO:2000449 | 0.034976281 | 1 | 3   | regulation of CD8-positive, alpha-beta T cell extravasation                                      | FADD                                                            |
| GO:0003351 | 0.035499433 | 2 | 18  | epithelial cilium movement                                                                       | CCDC39,DNAI1                                                    |
| GO:0006658 | 0.035829569 | 2 | 20  | phosphatidylserine metabolic process                                                             | SERINC3,PTDSS1                                                  |
| GO:0006091 | 0.035992015 | 6 | 179 | generation of precursor metabolites and energy                                                   | ENSACAG00000005218,NDUFB3,ACOX1,GPI,<br>ENSACAG00000003255,HK2  |
| GO:0015985 | 0.036334539 | 2 | 26  | energy coupled proton transport, down electrochemical gradient                                   | ATP6V0A1,ENSACAG00000021101                                     |

|            |             |    |     |                                                                |                                                                             |
|------------|-------------|----|-----|----------------------------------------------------------------|-----------------------------------------------------------------------------|
| GO:0055003 | 0.037311755 | 2  | 14  | cardiac myofibril assembly                                     | MYH10,ENSACAG00000017266                                                    |
| GO:1903445 | 0.038832855 | 1  | 3   | protein transport from ciliary membrane to plasma membrane     | RILPL2                                                                      |
| GO:0051452 | 0.038881033 | 2  | 25  | intracellular pH reduction                                     | ATP6V0A1,ENSACAG00000013950                                                 |
| GO:0051258 | 0.039002358 | 3  | 56  | protein polymerization                                         | MID1IP1,FGB,CENPJ<br>FBXO18,PTPRF,PDCD4,PAWR,NUP50,SERIN                    |
| GO:0080135 | 0.039499082 | 12 | 463 | regulation of cellular response to stress                      | C3,SPRED1,TERF2,ENSACAG00000004565,IMPACT,NPC1,CAPN1                        |
| GO:0042149 | 0.039651164 | 2  | 21  | cellular response to glucose starvation                        | HSPA5,IMPACT                                                                |
| GO:1901033 | 0.039701641 | 1  | 3   | positive regulation of response to reactive oxygen species     | PAWR                                                                        |
| GO:0009132 | 0.039723333 | 2  | 24  | nucleoside diphosphate metabolic process                       | NUDT7,AK2                                                                   |
| GO:0072429 | 0.040243661 | 1  | 3   | response to intra-S DNA damage checkpoint signaling            | FBXO18                                                                      |
| GO:0070681 | 0.040883428 | 1  | 3   | glutaminyI-tRNA <sup>Gln</sup> biosynthesis via transamidation | GATB                                                                        |
| GO:0022411 | 0.042246886 | 6  | 175 | cellular component disassembly                                 | NUP50,CASP6,ICT1,LAMA3,EIF2D,CAPN1                                          |
| GO:0006574 | 0.042399324 | 1  | 3   | valine catabolic process                                       | ACAD8                                                                       |
| GO:0007080 | 0.042727231 | 2  | 23  | mitotic metaphase plate congression                            | CHMP5,ANKRD53                                                               |
| GO:0009826 | 0.043786731 | 1  | 3   | unidimensional cell growth                                     | CADM1                                                                       |
| GO:0034436 | 0.044025394 | 1  | 3   | glycoprotein transport                                         | VLDLR                                                                       |
| GO:0034508 | 0.044420402 | 1  | 3   | centromere complex assembly                                    | CENPN                                                                       |
| GO:0030538 | 0.044739211 | 1  | 4   | embryonic genitalia morphogenesis                              | ROR2                                                                        |
| GO:0090342 | 0.045077091 | 2  | 26  | regulation of cell aging                                       | PAWR,TERF2                                                                  |
| GO:0030198 | 0.045772926 | 7  | 210 | extracellular matrix organization                              | COL1A2,SPOCK2,ABI3BP,COL18A1,LAMA3,S<br>PINT1,CAPN1                         |
| GO:0060670 | 0.045838069 | 1  | 4   | branching involved in labyrinthine layer morphogenesis         | SPINT1                                                                      |
| GO:0046395 | 0.045874003 | 6  | 172 | carboxylic acid catabolic process                              | ACAA2,ACOX1,ENSACAG00000004847,DDA<br>H2,IDUA,ACAD8                         |
| GO:0030162 | 0.04646724  | 10 | 384 | regulation of proteolysis                                      | N4BP1,PRKCG,FADD,SPOCK2,UBE3A,ENSA<br>CAG00000017928,ENSACAG00000015126,ENS |

|            |             |   |     |                                                |                                                     |
|------------|-------------|---|-----|------------------------------------------------|-----------------------------------------------------|
|            |             |   |     |                                                | ACAG00000029485,GPI,ENSACAG0000001480<br>6          |
| GO:0032200 | 0.046917447 | 3 | 52  | telomere organization                          | TERF2,POLA2,XRCC5                                   |
| GO:0033387 | 0.047045378 | 1 | 3   | putrescine biosynthetic process from ornithine | ODC1                                                |
| GO:0034334 | 0.047327023 | 1 | 3   | adherens junction maintenance                  | RASSF8                                              |
| GO:0043062 | 0.047338548 | 7 | 212 | extracellular structure organization           | COL1A2,SPOCK2,ABI3BP,COL18A1,LAMA3,S<br>PINT1,CAPN1 |
| GO:0034620 | 0.048675433 | 1 | 4   | cellular response to unfolded protein          | PACRG                                               |
| GO:2000189 | 0.048956469 | 1 | 3   | positive regulation of cholesterol homeostasis | NPC1                                                |
| GO:0097475 | 0.048990869 | 1 | 3   | motor neuron migration                         | RELN                                                |
| GO:0060546 | 0.049267568 | 1 | 4   | negative regulation of necroptotic process     | FADD                                                |

---

**Additional data table S1 (separate file)**

Dataset S1
